# Supplementary material for: High Ambient Temperature Regulated the Plant Systemic Response to the Beneficial Endophytic Fungus Serendipita indica
Source: Frontiers journal article supplement (doi:10.3389/fpls.2022.844572), 2022-03-16
Supplement: Data_Sheet_1.pdf [file Data_Sheet_1.pdf]

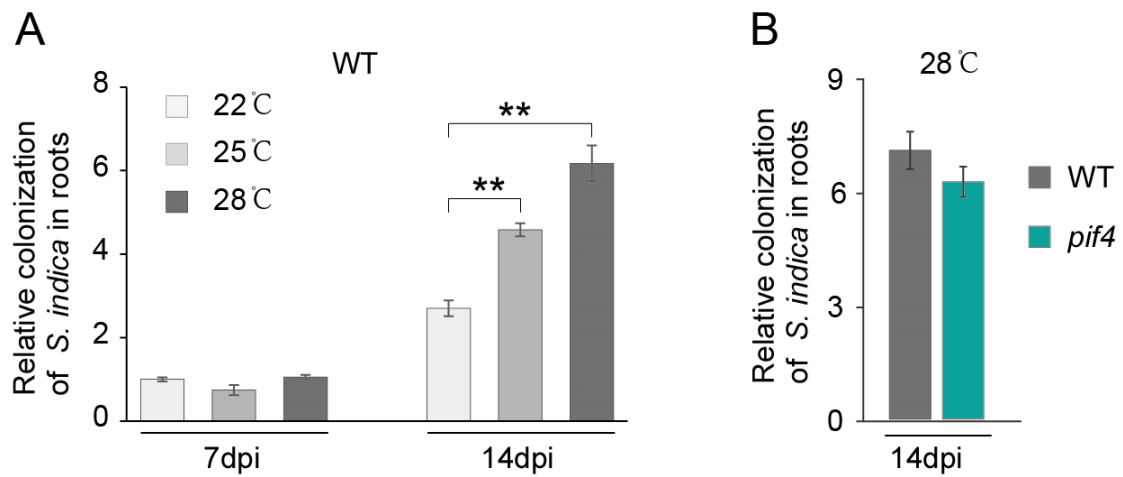

**Figure S1. The relative colonization level of *S. indica* in Arabidopsis roots**

(A) The relative colonization level of *S. indica* in wild type (WT) Arabidopsis roots at 7 days post incubation (dpi) or 14dpi under 22°C, 25°C and 28°C. (B) The relative colonization level of *S. indica* in the roots of WT and *pif4* mutant (*pif4-101*) plants at 14 dpi under 28°C. The relative colonization level of *S. indica* were detected by RT-qPCR analysis of *SiTef1* normalized to the expression of *AtUBQ5* (Nizam et al., 2019). Error bars indicate SE ( $n \geq 3$ ). Significance analysis of differences were performed by t-test (\*\*,  $P < 0.01$ ).

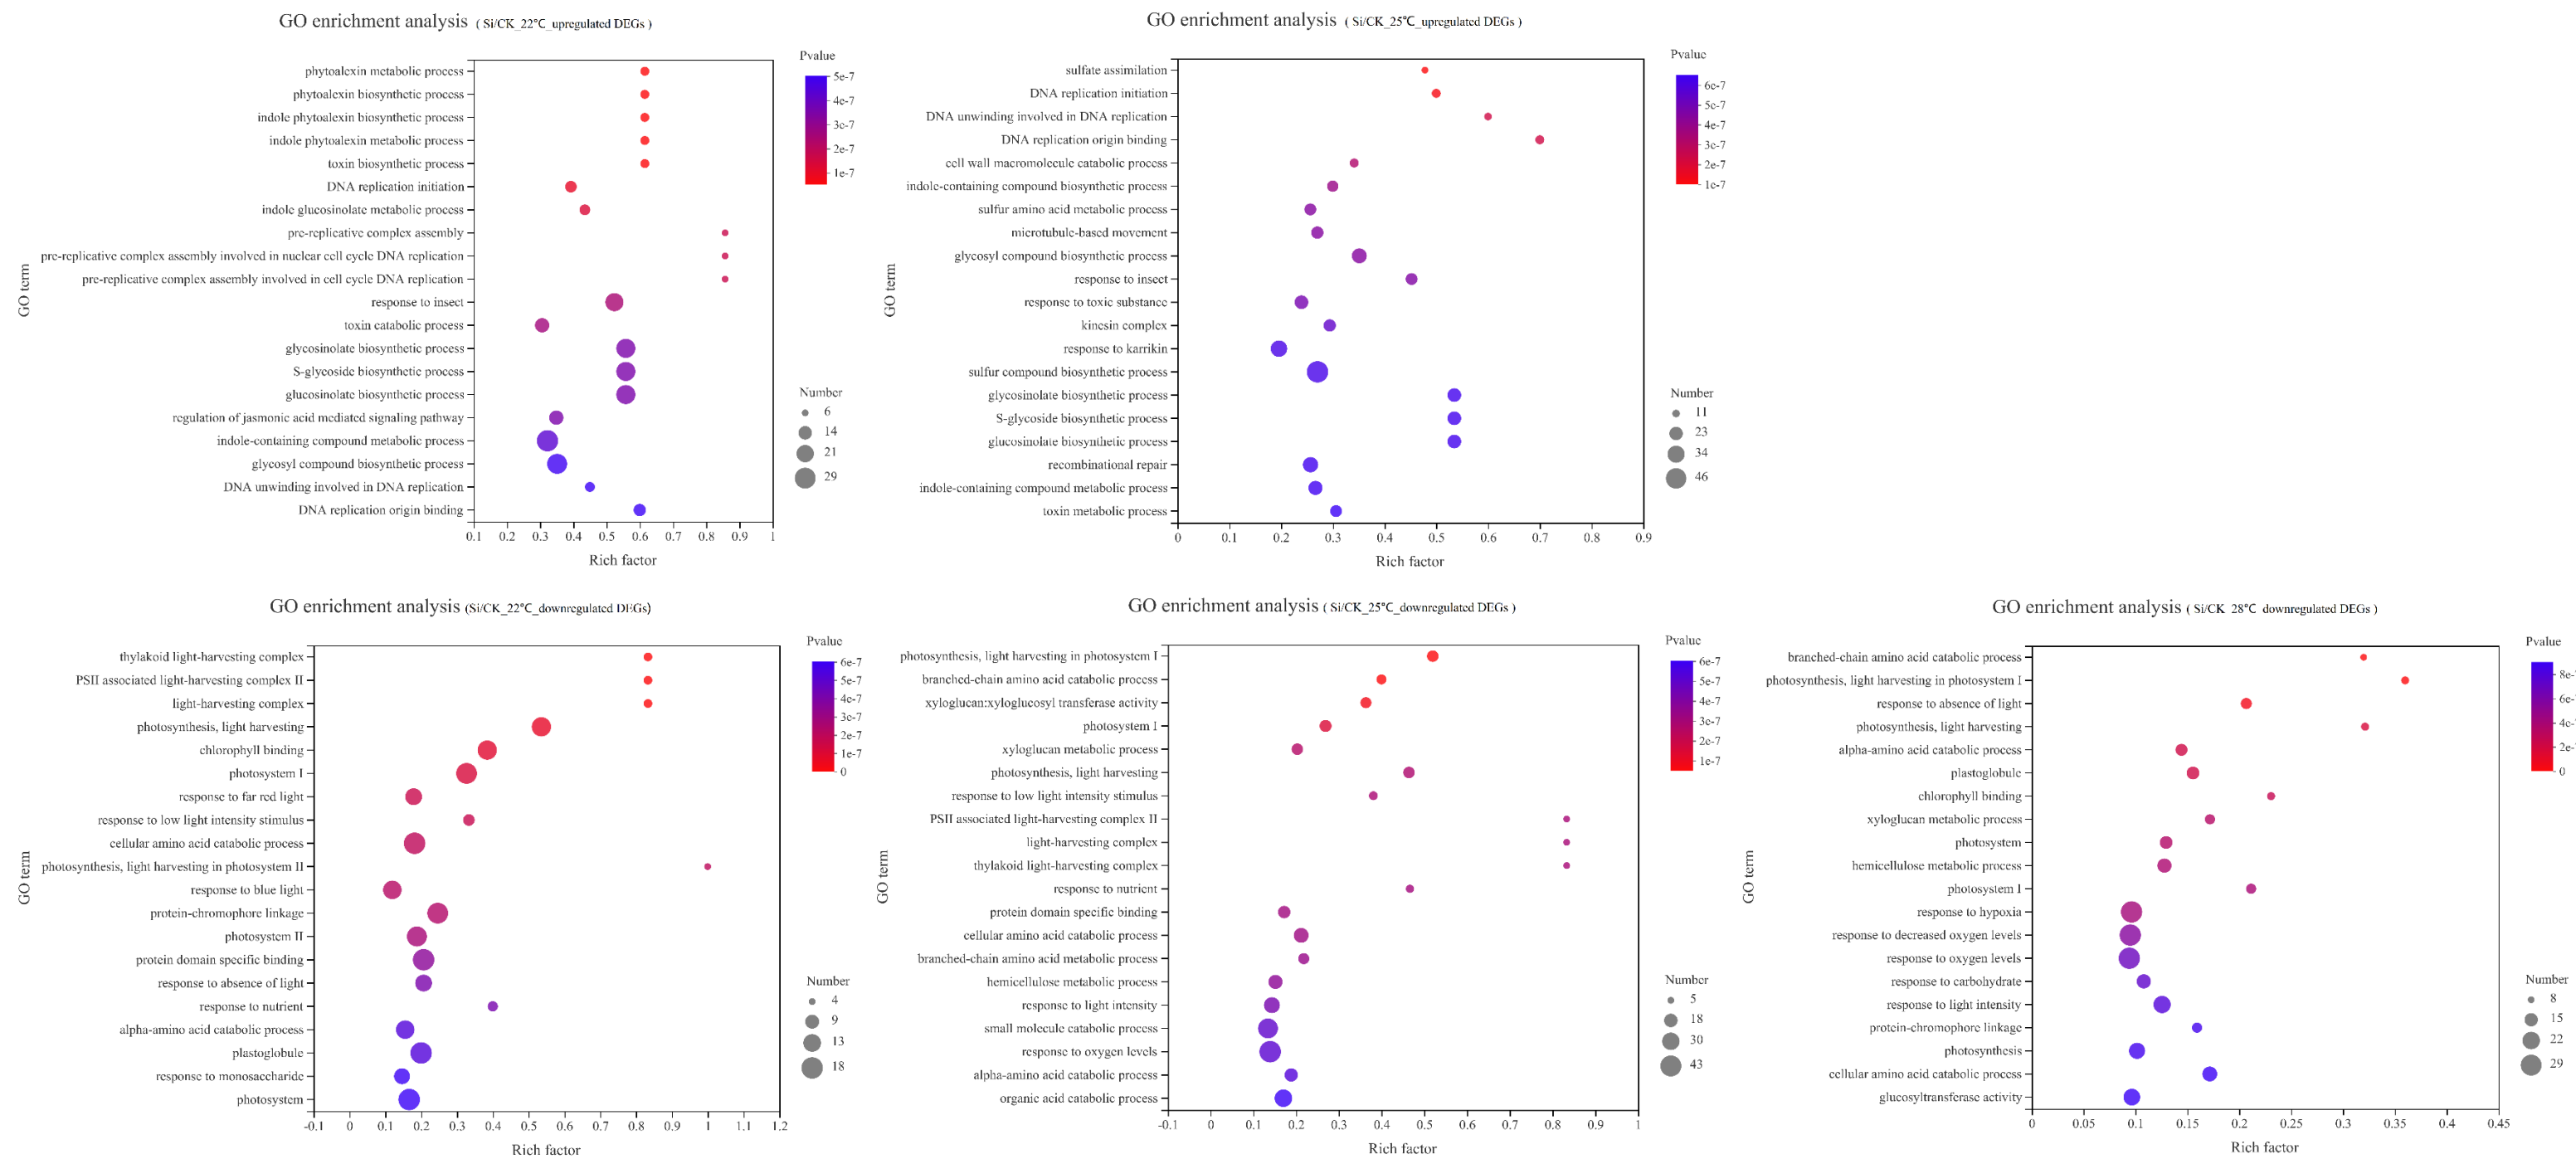

**Figure S2. GO enrichment analysis of the upregulated and downregulated DEGs**

Gene ontology (GO) enrichment analysis were performed for the upregulated differentially expressed genes (DEGs) between mycorrhizal symbiotic and nonsymbiotic plants at 22°C and 25°C, and the downregulated DEGs at 22°C, 25°C and 28°C.

**Table S4: Primers used in this study**

| Name          | Sequence (5'-3')         | Remarks                                   |
|---------------|--------------------------|-------------------------------------------|
| AtUBQ5-F257   | CCAAGCCGAAGAAGATCAAG     | qPCR for AT3G62250<br>( <i>AtUBQ5</i> )   |
| AtUBQ5-R361   | ACTCCTTCCTCAAACGCTGA     |                                           |
| MCM2-F2423    | GGCAATATGTCACAGAAGAGGAT  | qPCR for AT1G44900<br>( <i>MCM2</i> )     |
| MCM2-R2583    | GAGAAGAACGAGCAGCAATGA    |                                           |
| MCM4-F1830    | CCTTCCTCCAACCTTGCTATC    | qPCR for AT2G16440<br>( <i>MCM4</i> )     |
| MCM4-R1907    | CTTCGGTCAGTCTGCTCATC     |                                           |
| ORC2-F568     | CTAAGAGATCCCGAATCACAACAA | qPCR for AT2G37560<br>( <i>ORC2</i> )     |
| ORC2-R642     | AATAGAGGCAACCAAGCGTATG   |                                           |
| SiTef1-qF3089 | GCAAGTTCTCCGAGCTCATC     | RT-qPCR for AJ249911<br>( <i>SiTef1</i> ) |
| SiTef1-qR3245 | CCAAGTGGTGGGTACTCGTT     |                                           |
