# Supplementary material for: High Ambient Temperature Regulated the Plant Systemic Response to the Beneficial Endophytic Fungus Serendipita indica
Source: Front Plant Sci. 2022 Mar 16;13:844572. doi: 10.3389/fpls.2022.844572 (PMC8966885; doi:10.3389/fpls.2022.844572)
Supplement: Supplementary file 1 [file Table_1.XLSX]

## Sheet: WT_22C_Si_vs_CK DEGs
Gene_id	Gene name	Gene description	FC(WT_Si_22C/WT_CK_22C)	Log2FC(WT_Si_22C/WT_CK_22C)	Pvalue	Padjust	Significant	Regulate	WT_CK_22C_1	WT_CK_22C_2	WT_CK_22C_3	WT_Si_22C_1	WT_Si_22C_2	WT_Si_22C_3	Mean expression level in WT_CK_22C	Mean expression level in WT_Si_22C	GO_id	GO_term	KO_id	KO_name	Pathway_id	Pathway_definition	COG_id	COG_Functional Categories	NR_hit-name	NR_description	Swiss-Prot_hit-name	Swiss-Prot_description	Pfam_id	Domain	Domain description
AT1G55820	GIP1L	GBF-interacting protein 1-like [Source:UniProtKB/Swiss-Prot;Acc:A4FVR1]	683.632	9.41708	1.20496e-14	2.81345e-13	yes	up	0	0	0	4.67	4.05	2.86	0	3.86	GO:0008150;GO:0009116;GO:0005634;GO:0016301;GO:0051082;GO:0005515;GO:000552	BP:biological_process;BP:nucleoside metabolic process;CC:nucleus;MF:kinase activity;MF:unfolded protein binding;MF:protein binding;MF:ATP binding;	K00876	udk, UCK	map00240	Pyrimidine metabolism	ENOG41104R4;COG0035	U:Intracellular trafficking, secretion, and vesicular transport;	NP_175978.2	lysine-specific demethylase, putative (DUF1296) [Arabidopsis thaliana]	sp|A4FVR1|GIP1L_ARATH;	GBF-interacting protein 1-like OS=Arabidopsis thaliana OX=3702 GN=GIP1L PE=1 SV=1;	PF06972.12	DUF1296	Protein of unknown function
AT1G73740		Putative UDP-N-acetylglucosamine--N-acetylmuramyl-(Pentapeptide)-pyrophosphoryl-undecaprenol N-acetylglucosamine transferase; 62395-63952 [Source:UniProtKB/TrEMBL;Acc:Q9C9T8]	566.563	9.14609	1.50113e-13	3.07395e-12	yes	up	0	0	0	2	3.89	4.01	0	3.3	GO:0005975;GO:0071555;GO:0008360;GO:0051301;GO:0030259;GO:0007049;GO:0016020;GO:0005886;GO:0016740;GO:0016757;GO:0016758;GO:005051	BP:carbohydrate metabolic process;BP:cell wall organization;BP:regulation of cell shape;BP:cell division;BP:lipid glycosylation;BP:cell cycle;CC:membrane;CC:plasma membrane;MF:transferase activity;MF:transferase activity, transferring glycosyl groups;MF:transferase activity, transferring hexosyl groups;MF:undecaprenyldiphospho-muramoylpentapeptide beta-N-acetylglucosaminyltransferase activity;	K02563	murG	map01502	Vancomycin resistance	COG0707	K:Transcription	NP_177515.1	UDP-Glycosyltransferase superfamily protein [Arabidopsis thaliana]	sp|A0M527|MURG_GRAFK;	UDP-N-acetylglucosamine--N-acetylmuramyl;	PF04101.17;PF03033.21	Glyco_tran_28_C;Glyco_transf_28	Glycosyltransferase family 28 C-terminal domain;Glycosyltransferase family 28 N-terminal domain
AT5G33370		GDSL esterase/lipase At5g33370 [Source:UniProtKB/Swiss-Prot;Acc:Q8LB81]	314.42	8.29655	3.80591e-11	5.96314e-10	yes	up	0	0	0	2.99	1.86	2.73	0	2.52667	GO:0042335;GO:0006629;GO:0016042;GO:0005576;GO:0016787;GO:001678	BP:cuticle development;BP:lipid metabolic process;BP:lipid catabolic process;CC:extracellular region;MF:hydrolase activity;MF:hydrolase activity, acting on ester bonds;	------	------	------	------	COG3240	S:Function unknown	NP_198322.1	GDSL-like Lipase/Acylhydrolase superfamily protein [Arabidopsis thaliana]	sp|Q8LB81|GDL79_ARATH;	GDSL esterase/lipase At5g33370 OS=Arabidopsis thaliana OX=3702 GN=At5g33370 PE=2 SV=1;	PF00657.23	Lipase_GDSL	GDSL-like Lipase/Acylhydrolase
AT4G22030		F-box family protein with a domain of unknown function (DUF295) [Source:TAIR;Acc:AT4G22030]	299.029	8.22414	0.000281669	0.00130709	yes	up	0	0	0	0.39	7.23	0.67	0	2.76333	GO:0005975;GO:0016021;GO:000455	BP:carbohydrate metabolic process;CC:integral component of membrane;MF:hydrolase activity, hydrolyzing O-glycosyl compounds;	------	------	------	------	ENOG410YBD5	S:Function unknown	NP_193934.2	F-box protein with a domain protein [Arabidopsis thaliana]	sp|O65451|FB333_ARATH;	Probable F-box protein At4g22030 OS=Arabidopsis thaliana OX=3702 GN=At4g22030 PE=4 SV=1;	PF14476.7;PF18142.2	Chloroplast_duf;SLATT_fungal	Petal formation-expressed;SMODS and SLOG-associating 2TM effector domain
AT1G06137		unknown protein; FUNCTIONS IN: molecular_function unknown; INVOLVED IN: biological_process unknown; LOCATED IN: endomembrane system; BEST Arabidopsis thaliana protein match is: unknown protein (TAIR:AT1G06135.1); Ha. [Source:TAIR;Acc:AT1G06137]	261.768	8.03214	0.00489291	0.0161675	yes	up	0	0	0	0.26	46.08	3.01	0	16.45	GO:0008150;GO:0019243;GO:0016021;GO:0009507;GO:0004416;GO:0003674;GO:004687	BP:biological_process;BP:methylglyoxal catabolic process to D-lactate via S-lactoyl-glutathione;CC:integral component of membrane;CC:chloroplast;MF:hydroxyacylglutathione hydrolase activity;MF:molecular_function;MF:metal ion binding;	K01069	gloB, gloC, HAGH	map00620	Pyruvate metabolism	ENOG4111FEZ	Q:Secondary metabolites biosynthesis, transport and catabolism	NP_001117237.1	transmembrane protein [Arabidopsis thaliana]	------	------	------	------	------
AT2G28780		p-hydroxybenzoic acid efflux pump subunit [Source:UniProtKB/TrEMBL;Acc:Q84W96]	154.234	7.26898	1.00184e-07	9.36081e-07	yes	up	0	0	0	0.46	1.11	0.36	0	0.643333	GO:0055085;GO:0016021;GO:0016020;GO:0005886;GO:002285	BP:transmembrane transport;CC:integral component of membrane;CC:membrane;CC:plasma membrane;MF:transmembrane transporter activity;	------	------	------	------	ENOG4111M1Q	S:Function unknown	NP_180444.2	P-hydroxybenzoic acid efflux pump subunit [Arabidopsis thaliana]	------	------	PF13515.7;PF04632.13	FUSC_2;FUSC	Fusaric acid resistance protein-like;Fusaric acid resistance protein family
AT3G22275	JAZ13	Protein JAZ13 [Source:UniProtKB/Swiss-Prot;Acc:F4J078]	151.138	7.23972	1.32802e-07	1.21392e-06	yes	up	0	0	0	1.08	3.93	3.15	0	2.72	GO:2000022;GO:0009867;GO:0009611;GO:0006952;GO:0045892;GO:0031347;GO:0005634;GO:0003714;GO:000551	BP:regulation of jasmonic acid mediated signaling pathway;BP:jasmonic acid mediated signaling pathway;BP:response to wounding;BP:defense response;BP:negative regulation of transcription, DNA-templated;BP:regulation of defense response;CC:nucleus;MF:transcription corepressor activity;MF:protein binding;	------	------	------	------	ENOG41108DA	S:Function unknown	NP_001078200.1	jasmonate ZIM-domain protein [Arabidopsis thaliana]	sp|F4J078|JAZ13_ARATH;	Protein JAZ13 OS=Arabidopsis thaliana OX=3702 GN=JAZ13 PE=1 SV=1;	------	------	------
AT1G65310	ATXTH17	xyloglucan endotransglucosylase/hydrolase 17 [Source:TAIR;Acc:AT1G65310]	140.124	7.13057	1.2626e-07	1.15856e-06	yes	up	0	0	0	2.15	1.09	1.49	0	1.57667	GO:0071456;GO:0042546;GO:0005975;GO:0006073;GO:0071555;GO:0008152;GO:0010411;GO:0005794;GO:0005618;GO:0005886;GO:0048046;GO:0005576;GO:0009505;GO:0016787;GO:0016798;GO:0016762;GO:0016740;GO:000455	BP:cellular response to hypoxia;BP:cell wall biogenesis;BP:carbohydrate metabolic process;BP:cellular glucan metabolic process;BP:cell wall organization;BP:metabolic process;BP:xyloglucan metabolic process;CC:Golgi apparatus;CC:cell wall;CC:plasma membrane;CC:apoplast;CC:extracellular region;CC:plant-type cell wall;MF:hydrolase activity;MF:hydrolase activity, acting on glycosyl bonds;MF:xylogluca…	K08235	E2.4.1.207	------	------	COG2273	G:Carbohydrate transport and metabolism	NP_001321436.1	xyloglucan endotransglucosylase/hydrolase 17 [Arabidopsis thaliana]	sp|O80803|XTH17_ARATH;	Probable xyloglucan endotransglucosylase/hydrolase protein 17 OS=Arabidopsis thaliana OX=3702 GN=XTH17 PE=1 SV=1;	PF00722.22;PF06955.13	Glyco_hydro_16;XET_C	Glycosyl hydrolases family 16;Xyloglucan endo-transglycosylase
AT3G50800		Uncharacterized protein At3g50800 [Source:UniProtKB/TrEMBL;Acc:Q9SVL8]	128.929	7.01043	2.39634e-06	1.76226e-05	yes	up	0	0.37	0	30.57	6.87	16.92	0.123333	18.12	GO:0005575;GO:000551	CC:cellular_component;MF:protein binding;	------	------	------	------	ENOG410Z0XV	S:Function unknown	NP_190649.1	hypothetical protein AT3G50800 [Arabidopsis thaliana]	------	------	PF14009.7	DUF4228	Domain of unknown function
AT2G04860	PCMP-E74	Pentatricopeptide repeat-containing protein At2g04860 [Source:UniProtKB/Swiss-Prot;Acc:Q9SJ73]	118.79	6.89227	9.86385e-06	6.42527e-05	yes	up	0	0	0	0.06	1.21	0.76	0	0.676667	GO:0009451;GO:0043231;GO:0005739;GO:0003723;GO:000551	BP:RNA modification;CC:intracellular membrane-bounded organelle;CC:mitochondrion;MF:RNA binding;MF:protein binding;	------	------	------	------	ENOG410Z7Z7	S:Function unknown	NP_178563.2	Tetratricopeptide repeat (TPR)-like superfamily protein [Arabidopsis thaliana]	sp|Q9SJ73|PP148_ARATH;	Pentatricopeptide repeat-containing protein At2g04860 OS=Arabidopsis thaliana OX=3702 GN=PCMP-E74 PE=2 SV=3;	PF13041.7;PF01535.21;PF12854.8;PF13812.7	PPR_2;PPR;PPR_1;PPR_3	PPR repeat family;PPR repeat;PPR repeat;Pentatricopeptide repeat domain
AT3G60120	BGLU27	Beta-glucosidase 27 [Source:UniProtKB/Swiss-Prot;Acc:Q9M1D1]	117.388	6.87515	1.25167e-05	7.96187e-05	yes	up	0	0	0	0.15	1.77	0.19	0	0.703333	GO:0019762;GO:0005975;GO:0008152;GO:0009651;GO:0016021;GO:0016020;GO:0016787;GO:0016798;GO:0008422;GO:0102483;GO:000455	BP:glucosinolate catabolic process;BP:carbohydrate metabolic process;BP:metabolic process;BP:response to salt stress;CC:integral component of membrane;CC:membrane;MF:hydrolase activity;MF:hydrolase activity, acting on glycosyl bonds;MF:beta-glucosidase activity;MF:scopolin beta-glucosidase activity;MF:hydrolase activity, hydrolyzing O-glycosyl compounds;	K01188;brp	E3.2.1.21;	map00460;map00940;map00500	Cyanoamino acid metabolism;Phenylpropanoid biosynthesis;Starch and sucrose metabolism	COG2723	S:Function unknown	NP_191571.4	beta glucosidase 27 [Arabidopsis thaliana]	sp|Q9M1D1|BGL27_ARATH;	Beta-glucosidase 27 OS=Arabidopsis thaliana OX=3702 GN=BGLU27 PE=2 SV=2;	PF00232.19	Glyco_hydro_1	Glycosyl hydrolase family 1
AT3G21305		-	109.238	6.77134	2.53518e-05	0.000150728	yes	up	0	0	0	1.53	14.61	0.74	0	5.62667	------	------	------	------	------	------	------	------	NP_001325661.1	hypothetical protein AT3G21305 [Arabidopsis thaliana]	------	------	------	------	------
AT1G56650	MYB75	Transcription factor MYB75 [Source:UniProtKB/Swiss-Prot;Acc:Q9FE25]	98.585	6.6233	2.79223e-06	2.03046e-05	yes	up	0	0	0	0.63	1.61	1.39	0	1.21	GO:0009733;GO:0009718;GO:0009745;GO:0080167;GO:0019430;GO:0030154;GO:0009867;GO:0009723;GO:0006355;GO:0002239;GO:0031542;GO:0031540;GO:0005634;GO:0003700;GO:0043565;GO:0044212;GO:0005515;GO:000367	BP:response to auxin;BP:anthocyanin-containing compound biosynthetic process;BP:sucrose mediated signaling;BP:response to karrikin;BP:removal of superoxide radicals;BP:cell differentiation;BP:jasmonic acid mediated signaling pathway;BP:response to ethylene;BP:regulation of transcription, DNA-templated;BP:response to oomycetes;BP:positive regulation of anthocyanin biosynthetic process;BP:regulatio…	K09422;K16166	MYBP;PAP1, MYB75	map04712	Circadian rhythm - plant	COG5147	K:Transcription	NP_176057.1	production of anthocyanin pigment 1 [Arabidopsis thaliana]	sp|Q9FE25|MYB75_ARATH;	Transcription factor MYB75 OS=Arabidopsis thaliana OX=3702 GN=MYB75 PE=1 SV=1;	PF00249.32;PF13921.7	Myb_DNA-binding;Myb_DNA-bind_6	Myb-like DNA-binding domain;Myb-like DNA-binding domain
AT5G14565	MIR398C	MIR398C; miRNA [Source:TAIR;Acc:AT5G14565]	96.355	6.59029	7.12759e-06	4.77418e-05	yes	up	0	0	0	3.71	0.97	4.86	0	3.18	------	------	------	------	------	------	------	------	OAO89851.1	hypothetical protein AXX17_AT5G14050 [Arabidopsis thaliana]	------	------	------	------	------
AT1G80315		-	94.744	6.56597	3.29657e-06	2.35261e-05	yes	up	0	0	0	1.2	1.81	0.8	0	1.27	GO:0090414;GO:0015689;GO:0005773;GO:0016021;GO:0005739;GO:0009705;GO:001509	BP:molybdate ion export from vacuole;BP:molybdate ion transport;CC:vacuole;CC:integral component of membrane;CC:mitochondrion;CC:plant-type vacuole membrane;MF:molybdate ion transmembrane transporter activity;	------	------	------	------	ENOG410XTGP	P:Inorganic ion transport and metabolism	NP_178147.1	sulfate transmembrane transporter [Arabidopsis thaliana]	sp|Q0WP36|MOT2_ARATH;	Molybdate transporter 2 OS=Arabidopsis thaliana OX=3702 GN=MOT2 PE=1 SV=2;	------	------	------
AT1G12610	DREB1F	Dehydration-responsive element-binding protein 1F [Source:UniProtKB/Swiss-Prot;Acc:Q9LN86]	94.609	6.5639	7.13443e-06	4.77727e-05	yes	up	0	0	0	0.46	0.96	1.95	0	1.12333	GO:0010371;GO:0019760;GO:0050826;GO:0048510;GO:0006355;GO:0009414;GO:0009408;GO:0051510;GO:0005634;GO:0043565;GO:0044212;GO:0003700;GO:0000976;GO:000367	BP:regulation of gibberellin biosynthetic process;BP:glucosinolate metabolic process;BP:response to freezing;BP:regulation of timing of transition from vegetative to reproductive phase;BP:regulation of transcription, DNA-templated;BP:response to water deprivation;BP:response to heat;BP:regulation of unidimensional cell growth;CC:nucleus;MF:sequence-specific DNA binding;MF:transcription regulatory…	------	------	------	------	ENOG41108HV	K:Transcription	NP_172721.1	Integrase-type DNA-binding superfamily protein [Arabidopsis thaliana]	sp|Q9LN86|DRE1F_ARATH;	Dehydration-responsive element-binding protein 1F OS=Arabidopsis thaliana OX=3702 GN=DREB1F PE=2 SV=1;	PF00847.21;PF04360.13	AP2;Serglycin	AP2 domain;Serglycin
AT3G23800	SBP3	SBP3 [Source:UniProtKB/TrEMBL;Acc:A0A178VEQ9]	85.832	6.42345	8.28764e-06	5.4727e-05	yes	up	0	0.01	0	0.87	0.36	0.76	0.00333333	0.663333	GO:000843	MF:selenium binding;	K17285	SELENBP1	map00920	Sulfur metabolism	ENOG410XP4F	K:Transcription	NP_189022.1	selenium-binding protein 3 [Arabidopsis thaliana]	sp|Q9LK38|SEBP3_ARATH;	Selenium-binding protein 3 OS=Arabidopsis thaliana OX=3702 GN=SBP3 PE=2 SV=1;	PF05694.12	SBP56	56kDa selenium binding protein
AT1G67328		other RNA [Source:TAIR;Acc:AT1G67328]	84.565	6.40199	9.81379e-05	0.00051093	yes	up	0	0	0	1.37	0.83	0.03	0	0.743333	GO:0009827;GO:0006479;GO:0009834;GO:0045492;GO:0045491;GO:0005794;GO:0016021;GO:0005802;GO:0005768;GO:003077	BP:plant-type cell wall modification;BP:protein methylation;BP:plant-type secondary cell wall biogenesis;BP:xylan biosynthetic process;BP:xylan metabolic process;CC:Golgi apparatus;CC:integral component of membrane;CC:trans-Golgi network;CC:endosome;MF:glucuronoxylan 4-O-methyltransferase activity;	------	------	------	------	ENOG410YA8E	S:Function unknown	NP_176901.1	glucuronoxylan 4-O-methyltransferase-like protein (DUF579) [Arabidopsis thaliana]	sp|Q9C7F9|MT127_ARATH;	Probable methyltransferase At1g27930 OS=Arabidopsis thaliana OX=3702 GN=At1g27930 PE=1 SV=1;	------	------	------
AT3G46660	UGT76E12	Glycosyltransferase (Fragment) [Source:UniProtKB/TrEMBL;Acc:W8QNL7]	82.487	6.3661	1.24986e-05	7.95502e-05	yes	up	0	0	0	0.89	0.34	0.42	0	0.55	GO:0043231;GO:0033836;GO:0102425;GO:0080044;GO:0047893;GO:0102360;GO:0080043;GO:0016740;GO:0016757;GO:0016758;GO:000819	CC:intracellular membrane-bounded organelle;MF:flavonol 7-O-beta-glucosyltransferase activity;MF:myricetin 3-O-glucosyltransferase activity;MF:quercetin 7-O-glucosyltransferase activity;MF:flavonol 3-O-glucosyltransferase activity;MF:daphnetin 3-O-glucosyltransferase activity;MF:quercetin 3-O-glucosyltransferase activity;MF:transferase activity;MF:transferase activity, transferring glycosyl group…	------	------	------	------	COG1819	S:Function unknown	NP_566885.1	UDP-glucosyl transferase 76E12 [Arabidopsis thaliana]	sp|Q94AB5|U7E12_ARATH;	Flavonol 3-O-glucosyltransferase UGT76E12 OS=Arabidopsis thaliana OX=3702 GN=UGT76E12 PE=1 SV=1;	PF00201.19	UDPGT	UDP-glucoronosyl and UDP-glucosyl transferase
AT2G36440		Uncharacterized protein At2g36440 [Source:UniProtKB/TrEMBL;Acc:Q9SJR1]	80.195	6.32545	6.8621e-05	0.000370085	yes	up	0	0	0	3.28	14.3	1.22	0	6.26667	GO:000815	BP:biological_process;	------	------	------	------	------	------	NP_181185.1	hypothetical protein AT2G36440 [Arabidopsis thaliana]	------	------	------	------	------
AT3G13433		Transmembrane protein [Source:UniProtKB/TrEMBL;Acc:F4JDB5]	79.875	6.31967	3.75635e-05	0.000214488	yes	up	0	0	0	1.63	6.94	1.4	0	3.32333	GO:0008150;GO:0016021;GO:000367	BP:biological_process;CC:integral component of membrane;MF:molecular_function;	------	------	------	------	------	------	NP_001154615.1	transmembrane protein [Arabidopsis thaliana]	------	------	------	------	------
AT5G43650	BHLH92	Transcription factor bHLH92 [Source:UniProtKB/Swiss-Prot;Acc:Q9FIX5]	76.555	6.25842	0.00437053	0.0146533	yes	up	0.15	0	0	1.35	10.99	0.13	0.05	4.15667	GO:0006355;GO:0005634;GO:0044212;GO:0003700;GO:0000976;GO:0005515;GO:0003677;GO:004698	BP:regulation of transcription, DNA-templated;CC:nucleus;MF:transcription regulatory region DNA binding;MF:transcription factor activity, sequence-specific DNA binding;MF:transcription regulatory region sequence-specific DNA binding;MF:protein binding;MF:DNA binding;MF:protein dimerization activity;	------	------	------	------	ENOG410YV10	K:Transcription	NP_199178.1	basic helix-loop-helix (bHLH) DNA-binding superfamily protein [Arabidopsis thaliana]	sp|Q9FIX5|BH092_ARATH;	Transcription factor bHLH92 OS=Arabidopsis thaliana OX=3702 GN=BHLH92 PE=1 SV=1;	PF00010.27	HLH	Helix-loop-helix DNA-binding domain
AT1G76640	CML39	Calcium-binding protein CML39 [Source:UniProtKB/Swiss-Prot;Acc:Q9SRE7]	71.847	6.16685	0.000139637	0.000699684	yes	up	0	0	0	0.89	0.58	4.57	0	2.01333	GO:0071456;GO:0005737;GO:0046872;GO:000550	BP:cellular response to hypoxia;CC:cytoplasm;MF:metal ion binding;MF:calcium ion binding;	K13448	CML	map04626	Plant-pathogen interaction	COG5126	S:Function unknown	NP_177790.1	Calcium-binding EF-hand family protein [Arabidopsis thaliana]	sp|Q9SRE7|CML39_ARATH;	Calcium-binding protein CML39 OS=Arabidopsis thaliana OX=3702 GN=CML39 PE=2 SV=1;	PF13499.7;PF13833.7;PF13202.7;PF00036.33;PF13405.7;PF12763.8	EF-hand_7;EF-hand_8;EF-hand_5;EF-hand_1;EF-hand_6;EF-hand_4	EF-hand domain pair;EF-hand domain pair;EF hand;EF hand;EF-hand domain;Cytoskeletal-regulatory complex EF hand
AT2G31180	MYB14	Transcription factor MYB14 [Source:UniProtKB/Swiss-Prot;Acc:Q9SJX8]	70.475	6.13904	3.95813e-05	0.000224933	yes	up	0	0	0	1.42	0.51	0.75	0	0.893333	GO:0030154;GO:0050826;GO:0045893;GO:0009409;GO:0005634;GO:0043565;GO:0044212;GO:0003700;GO:0000976;GO:000367	BP:cell differentiation;BP:response to freezing;BP:positive regulation of transcription, DNA-templated;BP:response to cold;CC:nucleus;MF:sequence-specific DNA binding;MF:transcription regulatory region DNA binding;MF:transcription factor activity, sequence-specific DNA binding;MF:transcription regulatory region sequence-specific DNA binding;MF:DNA binding;	K09422	MYBP	------	------	COG5147	K:Transcription	NP_180676.1	myb domain protein 14 [Arabidopsis thaliana]	sp|Q9SJX8|MYB14_ARATH;	Transcription factor MYB14 OS=Arabidopsis thaliana OX=3702 GN=MYB14 PE=2 SV=1;	PF00249.32;PF13921.7	Myb_DNA-binding;Myb_DNA-bind_6	Myb-like DNA-binding domain;Myb-like DNA-binding domain
AT5G47850	CCR4	Serine/threonine-protein kinase-like protein CCR4 [Source:UniProtKB/Swiss-Prot;Acc:Q9FIJ6]	58.216	5.86335	2.19704e-06	1.62852e-05	yes	up	0	0.02	0.02	0.42	2.04	0.49	0.0133333	0.983333	GO:0006468;GO:0016310;GO:0016021;GO:0016020;GO:0016301;GO:0000166;GO:0004674;GO:0016740;GO:0106311;GO:0004672;GO:0106310;GO:0005524;GO:004280	BP:protein phosphorylation;BP:phosphorylation;CC:integral component of membrane;CC:membrane;MF:kinase activity;MF:nucleotide binding;MF:protein serine/threonine kinase activity;MF:transferase activity;MF:old GO;MF:protein kinase activity;MF:old GO;MF:ATP binding;MF:protein homodimerization activity;	------	------	------	------	COG0515	F:Nucleotide transport and metabolism	NP_199596.1	CRINKLY4 related 4 [Arabidopsis thaliana]	sp|Q9FIJ6|ACCR4_ARATH;	Serine/threonine-protein kinase-like protein CCR4 OS=Arabidopsis thaliana OX=3702 GN=CCR4 PE=1 SV=1;	PF00069.26;PF07714.18;PF13540.7	Pkinase;PK_Tyr_Ser-Thr;RCC1_2	Protein kinase domain;Protein tyrosine and serine/threonine kinase;Regulator of chromosome condensation
AT1G30135	TIFY5A	Protein TIFY 5A [Source:UniProtKB/Swiss-Prot;Acc:Q8LBM2]	55.987	5.80702	3.4514e-11	5.45143e-10	yes	up	0.26	0	0.09	3.41	10.58	9.38	0.116667	7.79	GO:2000022;GO:0009611;GO:0006952;GO:0031347;GO:0005634;GO:000551	BP:regulation of jasmonic acid mediated signaling pathway;BP:response to wounding;BP:defense response;BP:regulation of defense response;CC:nucleus;MF:protein binding;	------	------	------	------	ENOG410Z61E;ENOG41105HQ	S:Function unknown;K:Transcription	NP_564349.1	jasmonate-zim-domain protein 8 [Arabidopsis thaliana]	sp|Q8LBM2|TIF5A_ARATH;	Protein TIFY 5A OS=Arabidopsis thaliana OX=3702 GN=TIFY5A PE=1 SV=1;	PF06200.15;PF09425.11	tify;Jas_motif	tify domain;Jas motif
AT1G74080	MYB122	Transcription factor MYB122 [Source:UniProtKB/Swiss-Prot;Acc:Q9C9C8]	52.2	5.70598	3.29887e-05	0.000190748	yes	up	0	0.03	0	0.9	1.02	0.55	0.01	0.823333	GO:0030154;GO:0009625;GO:0006355;GO:0005634;GO:0009506;GO:0043565;GO:0044212;GO:0003700;GO:0000976;GO:000367	BP:cell differentiation;BP:response to insect;BP:regulation of transcription, DNA-templated;CC:nucleus;CC:plasmodesma;MF:sequence-specific DNA binding;MF:transcription regulatory region DNA binding;MF:transcription factor activity, sequence-specific DNA binding;MF:transcription regulatory region sequence-specific DNA binding;MF:DNA binding;	K09422	MYBP	------	------	COG5147	O:Posttranslational modification, protein turnover, chaperones	NP_177548.1	myb domain protein 122 [Arabidopsis thaliana]	sp|Q9C9C8|MY122_ARATH;	Transcription factor MYB122 OS=Arabidopsis thaliana OX=3702 GN=MYB122 PE=1 SV=1;	PF00249.32;PF13921.7	Myb_DNA-binding;Myb_DNA-bind_6	Myb-like DNA-binding domain;Myb-like DNA-binding domain
AT5G59330		Bifunctional inhibitor/lipid-transfer protein/seed storage 2S albumin superfamily protein [Source:UniProtKB/TrEMBL;Acc:Q1PDH3]	52.093	5.70301	0.000219839	0.00104778	yes	up	0	0	0	1.75	1.63	1.14	0	1.50667	GO:0006869;GO:0016021;GO:000828	BP:lipid transport;CC:integral component of membrane;MF:lipid binding;	------	------	------	------	ENOG410YT63	U:Intracellular trafficking, secretion, and vesicular transport	NP_200741.2	Bifunctional inhibitor/lipid-transfer protein/seed storage 2S albumin superfamily protein [Arabidopsis thaliana]	sp|Q9LLR6|NLTP4_ARATH;	Non-specific lipid-transfer protein 4 OS=Arabidopsis thaliana OX=3702 GN=LTP4 PE=3 SV=1;	------	------	------
AT4G28460	PIP1	PAMP-induced secreted peptide 1 [Source:UniProtKB/Swiss-Prot;Acc:Q1PE40]	50.343	5.65373	4.59535e-10	6.26349e-09	yes	up	0.34	0.15	0.14	4.53	27.96	4.89	0.21	12.46	GO:0045087;GO:2000280;GO:0006952;GO:0042742;GO:0006955;GO:0048046;GO:0005576;GO:000551	BP:innate immune response;BP:regulation of root development;BP:defense response;BP:defense response to bacterium;BP:immune response;CC:apoplast;CC:extracellular region;MF:protein binding;	------	------	------	------	ENOG4110855	S:Function unknown	ABK28261.1	unknown, partial [Arabidopsis thaliana]	sp|Q1PE40|PIP1_ARATH;	PAMP-induced secreted peptide 1 OS=Arabidopsis thaliana OX=3702 GN=PIP1 PE=1 SV=1;	------	------	------
AT5G36970	NHL25	NHL25 [Source:UniProtKB/TrEMBL;Acc:A0A178UFH9]	49.634	5.63326	0.000795332	0.00328738	yes	up	0	0	0	0.29	1.43	0.31	0	0.676667	GO:0009863;GO:0009814;GO:0098542;GO:0016020;GO:0016021;GO:000367	BP:salicylic acid mediated signaling pathway;BP:defense response, incompatible interaction;BP:defense response to other organism;CC:membrane;CC:integral component of membrane;MF:molecular_function;	------	------	------	------	ENOG410YFY3;ENOG410Z5SU;COG2723	S:Function unknown;G:Carbohydrate transport and metabolism	NP_198513.1	NDR1/HIN1-like 25 [Arabidopsis thaliana]	sp|Q8LD98|NHL6_ARATH;	NDR1/HIN1-like protein 6 OS=Arabidopsis thaliana OX=3702 GN=NHL6 PE=1 SV=1;	PF03168.14	LEA_2	Late embryogenesis abundant protein
AT5G40990	GLIP1	GDSL esterase/lipase 1 [Source:UniProtKB/Swiss-Prot;Acc:Q9FLN0]	49.479	5.62875	1.82904e-06	1.37907e-05	yes	up	0	0.08	0.02	2.09	1.87	0.89	0.0333333	1.61667	GO:0042742;GO:0009751;GO:0009753;GO:0009734;GO:0009866;GO:0016042;GO:0006629;GO:0010930;GO:0050832;GO:0006952;GO:0009620;GO:0009814;GO:0009817;GO:0009627;GO:0009723;GO:0009871;GO:0009873;GO:0005774;GO:0005615;GO:0016021;GO:0016020;GO:0005576;GO:0016787;GO:0016788;GO:001629	BP:defense response to bacterium;BP:response to salicylic acid;BP:response to jasmonic acid;BP:auxin-activated signaling pathway;BP:induced systemic resistance, ethylene mediated signaling pathway;BP:lipid catabolic process;BP:lipid metabolic process;BP:negative regulation of auxin mediated signaling pathway;BP:defense response to fungus;BP:defense response;BP:response to fungus;BP:defense respon…	------	------	------	------	COG3240	S:Function unknown	NP_198915.1	GDSL lipase 1 [Arabidopsis thaliana]	sp|Q9FLN0|GLIP1_ARATH;	GDSL esterase/lipase 1 OS=Arabidopsis thaliana OX=3702 GN=GLIP1 PE=1 SV=1;	PF00657.23	Lipase_GDSL	GDSL-like Lipase/Acylhydrolase
AT5G03375		-	47.054	5.55625	0.000527486	0.00227666	yes	up	0	0	0	12.66	8.17	3.72	0	8.18333	GO:0016020;GO:001675	CC:membrane;MF:transferase activity, transferring glycosyl groups;	------	------	------	------	ENOG410YDIX	S:Function unknown	CAA0404057.1	unnamed protein product [Arabidopsis thaliana]	------	------	------	------	------
AT1G23720		Proline-rich extensin-like family protein [Source:TAIR;Acc:AT1G23720]	45.273	5.50058	0.000758146	0.00315615	yes	up	0	0	0.02	0.09	0.84	0.06	0.00666667	0.33	GO:0009664;GO:0016021;GO:0016020;GO:000519	BP:plant-type cell wall organization;CC:integral component of membrane;CC:membrane;MF:structural constituent of cell wall;	------	------	------	------	------	------	CAA0237153.1	unnamed protein product [Arabidopsis thaliana]	sp|Q9M1G9|EXTN2_ARATH;	Extensin-2 OS=Arabidopsis thaliana OX=3702 GN=EXT2 PE=2 SV=1;	PF04554.14	Extensin_2	Extensin-like region
AT2G35637		other RNA [Source:TAIR;Acc:AT2G35637]	44.88	5.48799	1.97591e-08	2.09087e-07	yes	up	0	0	0.15	2.64	2.52	1.47	0.05	2.21	GO:0006355;GO:0016021;GO:0003700;GO:000367	BP:regulation of transcription, DNA-templated;CC:integral component of membrane;MF:transcription factor activity, sequence-specific DNA binding;MF:DNA binding;	------	------	------	------	ENOG410YGIR	S:Function unknown	NP_181107.1	Homeodomain-like superfamily protein [Arabidopsis thaliana]	sp|Q8VZ20|ASR3_ARATH;	Trihelix transcription factor ASR3 OS=Arabidopsis thaliana OX=3702 GN=ASR3 PE=1 SV=1;	------	------	------
AT4G34410	ERF109	Ethylene-responsive transcription factor ERF109 [Source:UniProtKB/Swiss-Prot;Acc:Q9SZ06]	44.334	5.47033	1.75969e-21	8.25328e-20	yes	up	0	0.28	0.17	4.75	8.63	11.35	0.15	8.24333	GO:0010928;GO:0090357;GO:0062211;GO:0010200;GO:0010087;GO:0050832;GO:0006355;GO:0009873;GO:0051301;GO:0005634;GO:0044212;GO:0003700;GO:0003677;GO:000097	BP:regulation of auxin mediated signaling pathway;BP:regulation of tryptophan metabolic process;BP:root regeneration;BP:response to chitin;BP:phloem or xylem histogenesis;BP:defense response to fungus;BP:regulation of transcription, DNA-templated;BP:ethylene-activated signaling pathway;BP:cell division;CC:nucleus;MF:transcription regulatory region DNA binding;MF:transcription factor activity, seq…	------	------	------	------	ENOG410YN6X	K:Transcription	NP_195167.1	redox responsive transcription factor 1 [Arabidopsis thaliana]	sp|Q9SZ06|EF109_ARATH;	Ethylene-responsive transcription factor ERF109 OS=Arabidopsis thaliana OX=3702 GN=ERF109 PE=1 SV=1;	PF00847.21	AP2	AP2 domain
AT4G22880	LDOX	AT4G22880 protein [Source:UniProtKB/TrEMBL;Acc:Q0WWD6]	44.065	5.46155	0.000701605	0.00294359	yes	up	0	0	0	0.63	0.43	0.33	0	0.463333	GO:0007033;GO:0009753;GO:0009718;GO:0009813;GO:0009611;GO:0055114;GO:0010023;GO:0051213;GO:0050589;GO:0046872;GO:0031418;GO:001649	BP:vacuole organization;BP:response to jasmonic acid;BP:anthocyanin-containing compound biosynthetic process;BP:flavonoid biosynthetic process;BP:response to wounding;BP:oxidation-reduction process;BP:proanthocyanidin biosynthetic process;MF:dioxygenase activity;MF:leucocyanidin oxygenase activity;MF:metal ion binding;MF:L-ascorbic acid binding;MF:oxidoreductase activity;	K05277	ANS	map00941	Flavonoid biosynthesis	COG3491	S:Function unknown	NP_001031700.1	leucoanthocyanidin dioxygenase [Arabidopsis thaliana]	sp|Q96323|LDOX_ARATH;	Leucoanthocyanidin dioxygenase OS=Arabidopsis thaliana OX=3702 GN=LDOX PE=1 SV=1;	PF03171.21;PF14226.7	2OG-FeII_Oxy;DIOX_N	2OG-F;non-haem dioxygenase in morphine synthesis N-terminal
AT5G52320	CYP96A4	CYP96A4 [Source:UniProtKB/TrEMBL;Acc:A0A178UE51]	43.299	5.43625	4.59869e-18	1.56305e-16	yes	up	0.06	0.12	0.03	4.28	4	3.29	0.07	3.85667	GO:0055114;GO:0009536;GO:0016021;GO:0016020;GO:0005634;GO:0004497;GO:0020037;GO:0016705;GO:0005506;GO:0046872;GO:001649	BP:oxidation-reduction process;CC:plastid;CC:integral component of membrane;CC:membrane;CC:nucleus;MF:monooxygenase activity;MF:heme binding;MF:oxidoreductase activity, acting on paired donors, with incorporation or reduction of molecular oxygen;MF:iron ion binding;MF:metal ion binding;MF:oxidoreductase activity;	------	------	------	------	COG2124	Q:Secondary metabolites biosynthesis, transport and catabolism	NP_200045.1	cytochrome P450, family 96, subfamily A, polypeptide 4 [Arabidopsis thaliana]	sp|Q9FVS9|C96AF_ARATH;	Alkane hydroxylase MAH1 OS=Arabidopsis thaliana OX=3702 GN=CYP96A15 PE=2 SV=1;	PF00067.23	p450	Cytochrome P450
AT2G08730		-	40.494	5.33963	8.99631e-05	0.000473535	yes	up	0	0.08	0.13	8.66	1.05	0.87	0.07	3.52667	GO:0016567;GO:0016021;GO:0016740;GO:004687	BP:protein ubiquitination;CC:integral component of membrane;MF:transferase activity;MF:metal ion binding;	------	------	------	------	ENOG41121N2	O:Posttranslational modification, protein turnover, chaperones	NP_181085.2	RING/U-box superfamily protein [Arabidopsis thaliana]	sp|Q6NKR1|ATL28_ARATH;	RING-H2 finger protein ATL28 OS=Arabidopsis thaliana OX=3702 GN=ATL28 PE=2 SV=1;	------	------	------
AT3G56500		Serine-rich protein-like protein [Source:UniProtKB/TrEMBL;Acc:Q9LXZ0]	38.872	5.28068	0.00426526	0.0143406	yes	up	0	0	0	1.4	10.86	0.84	0	4.36667	GO:000815	BP:biological_process;	------	------	------	------	ENOG410ZFKG	S:Function unknown	NP_191209.1	serine-rich protein-like protein [Arabidopsis thaliana]	------	------	------	------	------
AT3G25250	OXI1	Serine/threonine-protein kinase OXI1 [Source:UniProtKB/Swiss-Prot;Acc:Q9LSF1]	38.703	5.27437	1.1386e-05	7.30752e-05	yes	up	0.17	0.06	0.1	1.49	12.95	1.23	0.11	5.22333	GO:0006468;GO:0071456;GO:0016310;GO:0009611;GO:0006952;GO:0006979;GO:0005737;GO:0005634;GO:0005886;GO:0019901;GO:0016301;GO:0000166;GO:0004674;GO:0016740;GO:0106311;GO:0005515;GO:0004672;GO:0005524;GO:010631	BP:protein phosphorylation;BP:cellular response to hypoxia;BP:phosphorylation;BP:response to wounding;BP:defense response;BP:response to oxidative stress;CC:cytoplasm;CC:nucleus;CC:plasma membrane;MF:protein kinase binding;MF:kinase activity;MF:nucleotide binding;MF:protein serine/threonine kinase activity;MF:transferase activity;MF:old GO;MF:protein binding;MF:protein kinase activity;MF:ATP bind…	K20714	OXI1	map04016	MAPK signaling pathway - plant	ENOG410XQ0C	T:Signal transduction mechanisms	NP_189162.1	AGC (cAMP-dependent, cGMP-dependent and protein kinase C) kinase family protein [Arabidopsis thaliana]	sp|Q9LSF1|OXI1_ARATH;	Serine/threonine-protein kinase OXI1 OS=Arabidopsis thaliana OX=3702 GN=OXI1 PE=1 SV=1;	PF00069.26;PF07714.18;PF10707.10;PF17667.2;PF01636.24	Pkinase;PK_Tyr_Ser-Thr;YrbL-PhoP_reg;Pkinase_fungal;APH	Protein kinase domain;Protein tyrosine and serine/threonine kinase;PhoP regulatory network protein YrbL;Fungal protein kinase;Phosphotransferase enzyme family
AT5G55150		Putative F-box protein At5g55150 [Source:UniProtKB/Swiss-Prot;Acc:Q9FLP7]	38.503	5.26689	0.00324112	0.011317	yes	up	0	0	0	0.2	1	0.16	0	0.453333	GO:0008150;GO:000551	BP:biological_process;MF:protein binding;	------	------	------	------	ENOG410ZMUJ	S:Function unknown	NP_200326.2	F-box SKIP23-like protein (DUF295) [Arabidopsis thaliana]	sp|Q9FLP7|FB294_ARATH;	Putative F-box protein At5g55150 OS=Arabidopsis thaliana OX=3702 GN=At5g55150 PE=4 SV=2;	PF03478.19;PF12937.8	DUF295;F-box-like	Protein of unknown function;F-box-like
AT1G59950		Aldo/keto reductase [Source:UniProtKB/TrEMBL;Acc:Q1PFI5]	37.762	5.23885	0.00198388	0.00734881	yes	up	0	0	0	0.32	0.9	0.47	0	0.563333	GO:0055114;GO:0005829;GO:0004032;GO:0016616;GO:0008106;GO:0047834;GO:001649	BP:oxidation-reduction process;CC:cytosol;MF:aldito;MF:oxidoreductase activity, acting on the CH-OH group of donors, NAD or NADP as acceptor;MF:alcohol dehydrogenas;MF:D-threo-aldose 1-dehydrogenase activity;MF:oxidoreductase activity;	K22374	DMAS1	------	------	COG0656	T:Signal transduction mechanisms	NP_176203.1	NAD(P)-linked oxidoreductase superfamily protein [Arabidopsis thaliana]	sp|Q9SQ64|COR2_PAPSO;	Non-functional NADPH-dependent codeinone reductase 2 OS=Papaver somniferum OX=3469 GN=COR2 PE=1 SV=1;	PF00248.22	Aldo_ket_red	Aldo/keto reductase family
AT5G44430	PDF1.2C	PDF1.2c [Source:UniProtKB/TrEMBL;Acc:A0A178UR42]	37.619	5.23337	1.33654e-20	5.7306e-19	yes	up	0.48	0.77	0.16	21.19	23.83	18.7	0.47	21.24	GO:0050832;GO:0009753;GO:0009625;GO:0009861;GO:0031640;GO:0009723;GO:0006952;GO:0099503;GO:0005576;GO:000367	BP:defense response to fungus;BP:response to jasmonic acid;BP:response to insect;BP:jasmonic acid and ethylene-dependent systemic resistance;BP:killing of cells of other organism;BP:response to ethylene;BP:defense response;CC:secretory vesicle;CC:extracellular region;MF:molecular_function;	K20727	PDF1.2	map04016	MAPK signaling pathway - plant	ENOG41104P4	U:Intracellular trafficking, secretion, and vesicular transport	NP_199256.1	plant defensin 1.2C [Arabidopsis thaliana]	sp|Q9FI22|DEF17_ARATH;	Defensin-like protein 17 OS=Arabidopsis thaliana OX=3702 GN=PDF1.2C PE=2 SV=1;	PF00304.21	Gamma-thionin	Gamma-thionin family
AT5G05840		Emb [Source:UniProtKB/TrEMBL;Acc:Q9FFJ4]	37.409	5.22529	0.00424635	0.0142884	yes	up	0	0	0	0.31	0.47	0.03	0	0.27	------	------	------	------	------	------	ENOG410YE9P	S:Function unknown	AAU44541.1	hypothetical protein AT5G05840 [Arabidopsis thaliana]	------	------	PF04788.13	DUF620	Protein of unknown function
AT1G35290	ALT1	Acyl-acyl carrier protein thioesterase ATL1, chloroplastic [Source:UniProtKB/Swiss-Prot;Acc:Q9C7I5]	37.08	5.21256	0.00177093	0.00664944	yes	up	0	0	0	0.5	0.67	0.67	0	0.613333	GO:0006629;GO:0009536;GO:0005634;GO:0009507;GO:0016787;GO:0016295;GO:0016296;GO:0016297;GO:004738	BP:lipid metabolic process;CC:plastid;CC:nucleus;CC:chloroplast;MF:hydrolase activity;MF:myristoyl-[acyl-carrier-protein] hydrolase activity;MF:palmitoyl-[acyl-carrier-protein] hydrolase activity;MF:acyl-[acyl-carrier-protein] hydrolase activity;MF:dodecanoyl-[acyl-carrier-protein] hydrolase activity;	------	------	------	------	ENOG4111REW	S:Function unknown	NP_564457.1	Thioesterase superfamily protein [Arabidopsis thaliana]	sp|Q9C7I5|ALT1_ARATH;	Acyl-acyl carrier protein thioesterase ATL1, chloroplastic OS=Arabidopsis thaliana OX=3702 GN=ALT1 PE=1 SV=1;	PF03061.23;PF13279.7	4HBT;4HBT_2	Thioesterase superfamily;Thioesterase-like superfamily
AT4G08985		-	36.919	5.20629	0.0180036	0.0489971	yes	up	0	0	0	0	0.17	2.58	0	0.916667	GO:0010928;GO:0010200;GO:0009873;GO:0050832;GO:0010087;GO:0090357;GO:0051301;GO:0005634;GO:0044212;GO:0003700;GO:000367	BP:regulation of auxin mediated signaling pathway;BP:response to chitin;BP:ethylene-activated signaling pathway;BP:defense response to fungus;BP:phloem or xylem histogenesis;BP:regulation of tryptophan metabolic process;BP:cell division;CC:nucleus;MF:transcription regulatory region DNA binding;MF:transcription factor activity, sequence-specific DNA binding;MF:DNA binding;	------	------	------	------	ENOG410YN6X	K:Transcription	OAO97234.1	RRTF1 [Arabidopsis thaliana]	sp|Q9SZ06|EF109_ARATH;	Ethylene-responsive transcription factor ERF109 OS=Arabidopsis thaliana OX=3702 GN=ERF109 PE=1 SV=1;	------	------	------
AT1G21890		WAT1-related protein At1g21890 [Source:UniProtKB/Swiss-Prot;Acc:F4HZQ7]	36.908	5.20586	0.00199061	0.00737004	yes	up	0	0	0	0.37	0.39	0.27	0	0.343333	GO:0055085;GO:0016021;GO:0016020;GO:0005886;GO:002285	BP:transmembrane transport;CC:integral component of membrane;CC:membrane;CC:plasma membrane;MF:transmembrane transporter activity;	------	------	------	------	ENOG410YBPN	S:Function unknown	NP_173607.1	nodulin MtN21 /EamA-like transporter family protein [Arabidopsis thaliana]	sp|F4HZQ7|WTR5_ARATH;	WAT1-related protein At1g21890 OS=Arabidopsis thaliana OX=3702 GN=At1g21890 PE=2 SV=1;	PF00892.21	EamA	EamA-like transporter family
AT3G10527		-	36.889	5.20511	0.00948535	0.0284415	yes	up	0	0	0	6.52	0	4.73	0	3.75	GO:0090393;GO:0045786;GO:0042742;GO:0032875;GO:0045839;GO:0007049;GO:0032877;GO:0016021;GO:0005634;GO:000486	BP:sepal giant cell development;BP:negative regulation of cell cycle;BP:defense response to bacterium;BP:regulation of DNA endoreduplication;BP:negative regulation of mitotic nuclear division;BP:cell cycle;BP:positive regulation of DNA endoreduplication;CC:integral component of membrane;CC:nucleus;MF:protein kinase inhibitor activity;	------	------	------	------	ENOG4111BPR	K:Transcription	NP_001326181.1	hypothetical protein AT3G10527 [Arabidopsis thaliana]	sp|Q9LPP4|SMR1_ARATH;	Cyclin-dependent protein kinase inhibitor SMR1 OS=Arabidopsis thaliana OX=3702 GN=SMR1 PE=1 SV=1;	------	------	------
AT5G64790		Beta-1,3-glucanase [Source:UniProtKB/TrEMBL;Acc:Q9LV98]	35.945	5.16771	0.000356562	0.00160876	yes	up	0.03	0.03	0	0.11	2.22	0.21	0.02	0.846667	GO:0005975;GO:0008152;GO:0016021;GO:0016020;GO:0046658;GO:0031225;GO:0016787;GO:0016798;GO:0004553;GO:004297	BP:carbohydrate metabolic process;BP:metabolic process;CC:integral component of membrane;CC:membrane;CC:anchored component of plasma membrane;CC:anchored component of membrane;MF:hydrolase activity;MF:hydrolase activity, acting on glycosyl bonds;MF:hydrolase activity, hydrolyzing O-glycosyl compounds;MF:glucan endo-1,3-beta-D-glucosidase activity;	------	------	------	------	ENOG410YBX5	G:Carbohydrate transport and metabolism	NP_201284.1	O-Glycosyl hydrolases family 17 protein [Arabidopsis thaliana]	sp|Q6NKW9|E138_ARATH;	Glucan endo-1,3-beta-glucosidase 8 OS=Arabidopsis thaliana OX=3702 GN=At1g64760 PE=2 SV=2;	PF00332.19;PF07983.14	Glyco_hydro_17;X8	Glycosyl hydrolases family 17;X8 domain
AT1G09935		Phosphoglycerate mutase family protein [Source:UniProtKB/TrEMBL;Acc:F4I2N3]	35.315	5.1422	0.00526329	0.0171746	yes	up	0	0	0	0.31	1.46	0.14	0	0.636667	GO:0008150;GO:0005737;GO:0003824;GO:001686	BP:biological_process;CC:cytoplasm;MF:catalytic activity;MF:intramolecular transferase activity, phosphotransferases;	------	------	------	------	COG0406;ENOG4111QJY	S:Function unknown;	NP_683294.2	Phosphoglycerate mutase family protein [Arabidopsis thaliana]	sp|Q9FGF0|PGML1_ARATH;	Phosphoglycerate mutase-like protein 1 OS=Arabidopsis thaliana OX=3702 GN=At5g64460 PE=2 SV=1;	PF00300.23	His_Phos_1	Histidine phosphatase superfamily
AT1G21850	sks8	Sks8 [Source:UniProtKB/TrEMBL;Acc:A0A178W9U5]	35.225	5.13851	0.00650829	0.020672	yes	up	0	0	0	0.16	0.63	0.04	0	0.276667	GO:0055072;GO:0006826;GO:0055114;GO:0005886;GO:0004322;GO:0005507;GO:001649	BP:iron ion homeostasis;BP:iron ion transport;BP:oxidation-reduction process;CC:plasma membrane;MF:ferroxidase activity;MF:copper ion binding;MF:oxidoreductase activity;	------	------	------	------	COG2132	O:Posttranslational modification, protein turnover, chaperones	NP_173603.1	SKU5 similar 8 [Arabidopsis thaliana]	sp|Q00624|ASOL_BRANA;	L-ascorbate oxidase homolog OS=Brassica napus OX=3708 GN=Bp10 PE=2 SV=1;	PF00394.23;PF07732.16;PF07731.15	Cu-oxidase;Cu-oxidase_3;Cu-oxidase_2	Multicopper oxidase;Multicopper oxidase;Multicopper oxidase
AT2G28085		Auxin-responsive family protein [Source:UniProtKB/TrEMBL;Acc:Q8S8L5]	34.464	5.10701	0.00055795	0.00239402	yes	up	0.09	0	0	1.9	1.54	0.63	0.03	1.35667	GO:0009733;GO:0005575;GO:000367	BP:response to auxin;CC:cellular_component;MF:molecular_function;	rsz;K14488	;SAUR	map04075	Plant hormone signal transduction	ENOG4111EEH	S:Function unknown	ABK28516.1	unknown, partial [Arabidopsis thaliana]	sp|O65695|SAU50_ARATH;	Auxin-responsive protein SAUR50 OS=Arabidopsis thaliana OX=3702 GN=SAUR50 PE=1 SV=1;	PF02519.15	Auxin_inducible	Auxin responsive protein
AT4G28680	TYRDC	L-tyrosine decarboxylase [Source:TAIR;Acc:AT4G28680]	34.056	5.08985	2.93244e-05	0.00017178	yes	up	0.06	0	0	0.61	1.04	0.58	0.02	0.743333	GO:0009611;GO:1901695;GO:0006520;GO:0019752;GO:0009414;GO:0005737;GO:0016021;GO:0016829;GO:0016831;GO:0004058;GO:0003824;GO:0030170;GO:0004672;GO:0004837;GO:000552	BP:response to wounding;BP:tyramine biosynthetic process;BP:cellular amino acid metabolic process;BP:carboxylic acid metabolic process;BP:response to water deprivation;CC:cytoplasm;CC:integral component of membrane;MF:lyase activity;MF:carboxy-lyase activity;MF:aromatic-L-amino-acid decarboxylase activity;MF:catalytic activity;MF:pyridoxal phosphate binding;MF:protein kinase activity;MF:tyrosine …	K01592	TYDC	map00950;map00350	Isoquinoline alkaloid biosynthesis;Tyrosine metabolism	COG0076	T:Signal transduction mechanisms	NP_001329473.1	L-tyrosine decarboxylase [Arabidopsis thaliana]	sp|Q9M0G4|TYDC2_ARATH;	Probable tyrosine decarboxylase 2 OS=Arabidopsis thaliana OX=3702 GN=At4g28680 PE=3 SV=1;	PF00282.20;PF01212.22	Pyridoxal_deC;Beta_elim_lyase	Pyridoxal-dependent decarboxylase conserved domain;Beta-eliminating lyase
AT2G30770	CYP71A13	Indoleacetaldoxime dehydratase [Source:UniProtKB/Swiss-Prot;Acc:O49342]	33.721	5.07557	0.00339535	0.0117638	yes	up	0	0	0	0.36	0.34	0.16	0	0.286667	GO:0006952;GO:0055114;GO:0016021;GO:0016020;GO:0004497;GO:0016705;GO:0020037;GO:0047720;GO:0005506;GO:0046872;GO:0016829;GO:001649	BP:defense response;BP:oxidation-reduction process;CC:integral component of membrane;CC:membrane;MF:monooxygenase activity;MF:oxidoreductase activity, acting on paired donors, with incorporation or reduction of molecular oxygen;MF:heme binding;MF:indoleacetaldoxime dehydratase activity;MF:iron ion binding;MF:metal ion binding;MF:lyase activity;MF:oxidoreductase activity;	K11868	CYP71A13	map00380	Tryptophan metabolism	COG2124	Q:Secondary metabolites biosynthesis, transport and catabolism	NP_180635.3	cytochrome P450 family 71 polypeptide [Arabidopsis thaliana]	sp|O49342|C71AD_ARATH;	Indoleacetaldoxime dehydratase OS=Arabidopsis thaliana OX=3702 GN=CYP71A13 PE=1 SV=1;	PF00067.23	p450	Cytochrome P450
AT1G65450		HXXXD-type acyl-transferase family protein [Source:UniProtKB/TrEMBL;Acc:O80816]	32.998	5.04432	3.16914e-05	0.000184089	yes	up	0	0.06	0	1.03	0.92	0.65	0.02	0.866667	GO:0009567;GO:0005737;GO:0005634;GO:0016740;GO:001674	BP:double fertilization forming a zygote and endosperm;CC:cytoplasm;CC:nucleus;MF:transferase activity;MF:transferase activity, transferring acyl groups other than amino-acyl groups;	K15400	HHT1	map00073	Cutin, suberine and wax biosynthesis	ENOG4111F55	S:Function unknown	NP_564853.2	HXXXD-type acyl-transferase family protein [Arabidopsis thaliana]	sp|Q94CD1|HHT1_ARATH;	Omega-hydroxypalmitate O-feruloyl transferase OS=Arabidopsis thaliana OX=3702 GN=HHT1 PE=1 SV=1;	PF02458.16	Transferase	Transferase family
AT1G43605		-	32.89	5.03956	0.00501125	0.0164925	yes	up	0	0	0	0.57	0.22	0.58	0	0.456667	------	------	------	------	------	------	------	------	NP_001321007.1	hypothetical protein AT1G43605 [Arabidopsis thaliana]	------	------	------	------	------
AT1G79960	OFP14	OFP14 [Source:UniProtKB/TrEMBL;Acc:A0A178W942]	32.132	5.00593	0.00952916	0.0285489	yes	up	0	0	0	0.31	1.23	0.07	0	0.536667	GO:0045892;GO:000563	BP:negative regulation of transcription, DNA-templated;CC:nucleus;	------	------	------	------	ENOG410YP0A	S:Function unknown	NP_178114.1	ovate family protein 14 [Arabidopsis thaliana]	sp|Q9S7T5|OFP14_ARATH;	Transcription repressor OFP14 OS=Arabidopsis thaliana OX=3702 GN=OFP14 PE=1 SV=1;	PF04844.14	Ovate	Transcriptional repressor, ovate
AT5G38550	JAL44	Jacalin-related lectin 44 [Source:UniProtKB/Swiss-Prot;Acc:Q9FFW6]	31.982	4.99918	0.0010697	0.00428061	yes	up	0	0.02	0	0.29	0.14	0.62	0.00666667	0.35	GO:003024	MF:carbohydrate binding;	------	------	------	------	ENOG41104AJ	S:Function unknown	NP_198671.1	Mannose-binding lectin superfamily protein [Arabidopsis thaliana]	sp|Q9FFW6|JAL44_ARATH;	Jacalin-related lectin 44 OS=Arabidopsis thaliana OX=3702 GN=JAL44 PE=2 SV=1;	PF01419.18	Jacalin	Jacalin-like lectin domain
AT2G40740	WRKY55	WRKY DNA-binding protein 55 [Source:TAIR;Acc:AT2G40740]	31.072	4.95754	0.000330617	0.00150375	yes	up	0.05	0.31	0.48	1.11	20.39	2.1	0.28	7.86667	GO:0006355;GO:0005634;GO:0043565;GO:0044212;GO:0003700;GO:000367	BP:regulation of transcription, DNA-templated;CC:nucleus;MF:sequence-specific DNA binding;MF:transcription regulatory region DNA binding;MF:transcription factor activity, sequence-specific DNA binding;MF:DNA binding;	------	------	------	------	ENOG410YNE8	S:Function unknown	NP_001324304.1	WRKY DNA-binding protein 55 [Arabidopsis thaliana]	sp|Q9SHB5|WRK55_ARATH;	WRKY transcription factor 55 OS=Arabidopsis thaliana OX=3702 GN=WRKY55 PE=2 SV=1;	PF03106.16	WRKY	WRKY DNA -binding domain
AT4G01390		TRAF-like family protein [Source:UniProtKB/TrEMBL;Acc:F4JI18]	29.028	4.85937	0.00277055	0.00986476	yes	up	0.66	0	0	7.69	8.38	5.91	0.22	7.32667	GO:0022900;GO:0005737;GO:0005634;GO:0005515;GO:000905	BP:electron transport chain;CC:cytoplasm;CC:nucleus;MF:protein binding;MF:electron carrier activity;	------	------	------	------	ENOG410XQV8	S:Function unknown	NP_192048.2	TRAF-like family protein [Arabidopsis thaliana]	sp|Q84WU2|UBP13_ARATH;	Ubiquitin carboxyl-terminal hydrolase 13 OS=Arabidopsis thaliana OX=3702 GN=UBP13 PE=1 SV=1;	PF00917.27	MATH	MATH domain
AT5G55720		Putative pectate lyase 21 [Source:UniProtKB/Swiss-Prot;Acc:Q9FM66]	28.1	4.81251	0.00876412	0.0266057	yes	up	0	0	0	0.22	0.4	0.12	0	0.246667	GO:0045490;GO:0030570;GO:0016829;GO:004687	BP:pectin catabolic process;MF:pectate lyase activity;MF:lyase activity;MF:metal ion binding;	K01728	pel	map00040	Pentose and glucuronate interconversions	COG3866	G:Carbohydrate transport and metabolism	NP_200383.1	Pectin lyase-like superfamily protein [Arabidopsis thaliana]	sp|Q9FM66|PLY21_ARATH;	Putative pectate lyase 21 OS=Arabidopsis thaliana OX=3702 GN=At5g55720 PE=3 SV=1;	PF00544.20;PF13229.7	Pectate_lyase_4;Beta_helix	Pectate lyase;Right handed beta helix region
AT5G36260		At5g36260 [Source:UniProtKB/TrEMBL;Acc:Q4V3D2]	26.542	4.7302	0.0103223	0.0306134	yes	up	0	0	0	0.14	0.26	0.12	0	0.173333	GO:0009860;GO:0009555;GO:0009846;GO:0010183;GO:0006508;GO:0030163;GO:0005737;GO:0016020;GO:0005829;GO:0090406;GO:0005886;GO:0031225;GO:0016021;GO:0016787;GO:0004190;GO:000823	BP:pollen tube growth;BP:pollen development;BP:pollen germination;BP:pollen tube guidance;BP:proteolysis;BP:protein catabolic process;CC:cytoplasm;CC:membrane;CC:cytosol;CC:pollen tube;CC:plasma membrane;CC:anchored component of membrane;CC:integral component of membrane;MF:hydrolase activity;MF:aspartic-type endopeptidase activity;MF:peptidase activity;	------	------	------	------	ENOG410XNV7	O:Posttranslational modification, protein turnover, chaperones	NP_198475.2	Eukaryotic aspartyl protease family protein [Arabidopsis thaliana]	sp|Q9S9K4|ASPL2_ARATH;	Aspartic proteinase-like protein 2 OS=Arabidopsis thaliana OX=3702 GN=At1g65240 PE=3 SV=2;	PF14543.7;PF00026.24;PF14541.7	TAXi_N;Asp;TAXi_C	Xylanase inhibitor N-terminal;Eukaryotic aspartyl protease;Xylanase inhibitor C-terminal
AT4G36950	MAPKKK21	Mitogen-activated protein kinase kinase kinase 21 [Source:UniProtKB/TrEMBL;Acc:Q6K1M3]	26.519	4.72893	0.0100708	0.0299795	yes	up	0	0	0	0.16	0.32	0.25	0	0.243333	GO:0006468;GO:0006629;GO:0016310;GO:0007346;GO:0023014;GO:0031098;GO:0032147;GO:0005737;GO:0008081;GO:0016301;GO:0000166;GO:0004674;GO:0016740;GO:0004672;GO:000552	BP:protein phosphorylation;BP:lipid metabolic process;BP:phosphorylation;BP:regulation of mitotic cell cycle;BP:signal transduction by protein phosphorylation;BP:stress-activated protein kinase signaling cascade;BP:activation of protein kinase activity;CC:cytoplasm;MF:phosphoric diester hydrolase activity;MF:kinase activity;MF:nucleotide binding;MF:protein serine/threonine kinase activity;MF:tran…	------	------	------	------	ENOG410XQGS;ENOG4111H2I	S:Function unknown;	NP_001078504.1	mitogen-activated protein kinase kinase kinase 21 [Arabidopsis thaliana]	sp|Q9SND6|M3K20_ARATH;	Mitogen-activated protein kinase kinase kinase 20 OS=Arabidopsis thaliana OX=3702 GN=MAPKKK20 PE=1 SV=1;	PF00069.26;PF07714.18	Pkinase;PK_Tyr_Ser-Thr	Protein kinase domain;Protein tyrosine and serine/threonine kinase
AT3G01190	PER27	Peroxidase [Source:UniProtKB/TrEMBL;Acc:A0A178V802]	26.318	4.71797	0.00266408	0.00952991	yes	up	0	0.04	0	0.53	0.77	0.17	0.0133333	0.49	GO:0098869;GO:0042744;GO:0055114;GO:0006979;GO:0005773;GO:0005576;GO:0009505;GO:0009506;GO:0020037;GO:0004601;GO:0046872;GO:001649	BP:cellular oxidant detoxification;BP:hydrogen peroxide catabolic process;BP:oxidation-reduction process;BP:response to oxidative stress;CC:vacuole;CC:extracellular region;CC:plant-type cell wall;CC:plasmodesma;MF:heme binding;MF:peroxidase activity;MF:metal ion binding;MF:oxidoreductase activity;	K00430	E1.11.1.7	map00940	Phenylpropanoid biosynthesis	ENOG410YCC5	G:Carbohydrate transport and metabolism	NP_186768.1	Peroxidase superfamily protein [Arabidopsis thaliana]	sp|Q43735|PER27_ARATH;	Peroxidase 27 OS=Arabidopsis thaliana OX=3702 GN=PER27 PE=1 SV=1;	PF00141.24	peroxidase	Peroxidase
AT1G66370	MYB113	Transcription factor MYB113 [Source:UniProtKB/Swiss-Prot;Acc:Q9FNV9]	25.964	4.69844	0.0107009	0.0315581	yes	up	0	0	0	0.39	0.31	0.48	0	0.393333	GO:0009733;GO:0019430;GO:0009745;GO:0080167;GO:0030154;GO:0009867;GO:0009718;GO:0031542;GO:0006355;GO:0002239;GO:0009723;GO:0007275;GO:0031540;GO:0005634;GO:0043565;GO:0044212;GO:0003700;GO:0005515;GO:000367	BP:response to auxin;BP:removal of superoxide radicals;BP:sucrose mediated signaling;BP:response to karrikin;BP:cell differentiation;BP:jasmonic acid mediated signaling pathway;BP:anthocyanin-containing compound biosynthetic process;BP:positive regulation of anthocyanin biosynthetic process;BP:regulation of transcription, DNA-templated;BP:response to oomycetes;BP:response to ethylene;BP:multicell…	K09422	MYBP	------	------	COG5147	K:Transcription	NP_176811.1	myb domain protein 113 [Arabidopsis thaliana]	sp|Q9FNV9|MY113_ARATH;	Transcription factor MYB113 OS=Arabidopsis thaliana OX=3702 GN=MYB113 PE=1 SV=1;	PF00249.32;PF13921.7	Myb_DNA-binding;Myb_DNA-bind_6	Myb-like DNA-binding domain;Myb-like DNA-binding domain
AT4G24010	CSLG1	Glycosyltransferase (Fragment) [Source:UniProtKB/TrEMBL;Acc:W8QNF0]	25.76	4.68708	0.00354694	0.0122142	yes	up	0	0.02	0	0.21	0.4	0.06	0.00666667	0.223333	GO:0097502;GO:0071555;GO:0009833;GO:0030244;GO:0005794;GO:0005802;GO:0016021;GO:0016020;GO:0000139;GO:0005886;GO:0051753;GO:0016740;GO:0016760;GO:0016757;GO:001675	BP:mannosylation;BP:cell wall organization;BP:plant-type primary cell wall biogenesis;BP:cellulose biosynthetic process;CC:Golgi apparatus;CC:trans-Golgi network;CC:integral component of membrane;CC:membrane;CC:Golgi membrane;CC:plasma membrane;MF:mannan synthase activity;MF:transferase activity;MF:cellulose synthas;MF:transferase activity, transferring glycosyl groups;MF:cellulose synthase activ…	------	------	------	------	COG1215	M:Cell wall/membrane/envelope biogenesis	NP_194132.3	cellulose synthase like G1 [Arabidopsis thaliana]	sp|Q570S7|CSLG1_ARATH;	Cellulose synthase-like protein G1 OS=Arabidopsis thaliana OX=3702 GN=CSLG1 PE=2 SV=1;	PF03552.15;PF13632.7	Cellulose_synt;Glyco_trans_2_3	Cellulose synthase;Glycosyl transferase family group 2
AT3G25855		At3g25855 [Source:UniProtKB/TrEMBL;Acc:Q8LBL7]	25.494	4.67207	0.0173517	0.0475	yes	up	0	0	0	0.99	0.17	1.28	0	0.813333	GO:0030001;GO:004687	BP:metal ion transport;MF:metal ion binding;	------	------	------	------	ENOG410Z040	S:Function unknown	NP_566781.1	Copper transport protein family [Arabidopsis thaliana]	------	------	------	------	------
AT1G52830	IAA6	SHY1 [Source:UniProtKB/TrEMBL;Acc:A0A384LEJ2]	25.415	4.66763	0.0181679	0.0493818	yes	up	0	0	0	0.07	0.7	0.54	0	0.436667	GO:0009733;GO:0009734;GO:0009704;GO:0006355;GO:0005634;GO:0044212;GO:0003700;GO:0000976;GO:0005515;GO:004280	BP:response to auxin;BP:auxin-activated signaling pathway;BP:de-etiolation;BP:regulation of transcription, DNA-templated;CC:nucleus;MF:transcription regulatory region DNA binding;MF:transcription factor activity, sequence-specific DNA binding;MF:transcription regulatory region sequence-specific DNA binding;MF:protein binding;MF:identical protein binding;	K14484	IAA	map04075	Plant hormone signal transduction	ENOG41108UH;ENOG4111813	K:Transcription;	NP_175692.1	indole-3-acetic acid 6 [Arabidopsis thaliana]	sp|Q38824|IAA6_ARATH;	Auxin-responsive protein IAA6 OS=Arabidopsis thaliana OX=3702 GN=IAA6 PE=1 SV=2;	PF02309.17	AUX_IAA	AUX/IAA family
AT2G40435		Transcription factor SCREAM-like protein [Source:UniProtKB/TrEMBL;Acc:Q8RUZ5]	25.23	4.65709	0.014362	0.0406202	yes	up	0	0	0	0.24	0.65	0.26	0	0.383333	GO:0006355;GO:0005634;GO:0003700;GO:004356	BP:regulation of transcription, DNA-templated;CC:nucleus;MF:transcription factor activity, sequence-specific DNA binding;MF:sequence-specific DNA binding;	------	------	------	------	ENOG410YJUZ	S:Function unknown	NP_565932.1	transcription factor SCREAM-like protein [Arabidopsis thaliana]	------	------	------	------	------
AT4G14700	ORC1A	Origin of replication complex subunit 1A [Source:UniProtKB/Swiss-Prot;Acc:Q710E8]	25.01	4.64441	0.0140061	0.0398496	yes	up	0	0	0	0.1	0.19	0.07	0	0.12	GO:0033314;GO:0000278;GO:0006355;GO:0006270;GO:0009567;GO:0006260;GO:0000808;GO:0005634;GO:0000784;GO:0005664;GO:0046872;GO:0016887;GO:0000166;GO:0003688;GO:0010385;GO:0042393;GO:0005515;GO:0003677;GO:0003682;GO:000552	BP:mitotic DNA replication checkpoint;BP:mitotic cell cycle;BP:regulation of transcription, DNA-templated;BP:DNA replication initiation;BP:double fertilization forming a zygote and endosperm;BP:DNA replication;CC:origin recognition complex;CC:nucleus;CC:nuclear chromosome, telomeric region;CC:nuclear origin of replication recognition complex;MF:metal ion binding;MF:ATPase activity;MF:nucleotide b…	K02603	ORC1	------	------	COG1474	S:Function unknown	NP_567440.1	origin recognition complex 1 [Arabidopsis thaliana]	sp|Q710E8|ORC1A_ARATH;	Origin of replication complex subunit 1A OS=Arabidopsis thaliana OX=3702 GN=ORC1A PE=1 SV=1;	PF00004.30;PF17872.2;PF01426.19;PF00628.30;PF13191.7;PF13401.7	AAA;AAA_lid_10;BAH;PHD;AAA_16;AAA_22	ATPase family associated with various cellular activities;AAA lid domain;BAH domain;PHD-finger;AAA ATPase domain;AAA domain
AT1G20990		Cysteine/Histidine-rich C1 domain family protein [Source:UniProtKB/TrEMBL;Acc:F4HWC5]	24.745	4.62906	0.0133886	0.0383468	yes	up	0	0	0	0.16	0.24	0.3	0	0.233333	GO:0008150;GO:0005575;GO:000367	BP:biological_process;CC:cellular_component;MF:molecular_function;	------	------	------	------	ENOG410YCZW	S:Function unknown	OAP15358.1	hypothetical protein AXX17_AT1G22060 [Arabidopsis thaliana]	------	------	PF03107.17;PF00130.23;PF00628.30	C1_2;C1_1;PHD	C1 domain;Phorbol esters/diacylglycerol binding domain;PHD-finger
AT1G63710	CYP86A7	Cytochrome P450 86A7 [Source:UniProtKB/Swiss-Prot;Acc:Q9CAD6]	24.603	4.62074	0.0167168	0.046045	yes	up	0	0	0	0.08	0.1	0.3	0	0.16	GO:0006631;GO:0055114;GO:0016021;GO:0016020;GO:0004497;GO:0016705;GO:0020037;GO:0070330;GO:0018685;GO:0005506;GO:0046872;GO:001649	BP:fatty acid metabolic process;BP:oxidation-reduction process;CC:integral component of membrane;CC:membrane;MF:monooxygenase activity;MF:oxidoreductase activity, acting on paired donors, with incorporation or reduction of molecular oxygen;MF:heme binding;MF:aromatase activity;MF:alkane 1-monooxygenase activity;MF:iron ion binding;MF:metal ion binding;MF:oxidoreductase activity;	K15398	CYP86A4S	map00073	Cutin, suberine and wax biosynthesis	COG2124	T:Signal transduction mechanisms	NP_176558.1	cytochrome P450, family 86, subfamily A, polypeptide 7 [Arabidopsis thaliana]	sp|Q9CAD6|C86A7_ARATH;	Cytochrome P450 86A7 OS=Arabidopsis thaliana OX=3702 GN=CYP86A7 PE=2 SV=1;	PF00067.23	p450	Cytochrome P450
AT5G17390		Adenine nucleotide alpha hydrolases-like superfamily protein [Source:UniProtKB/TrEMBL;Acc:Q9LF45]	24.499	4.61463	0.00420472	0.0141681	yes	up	0	0.06	0	0.35	1.31	0.31	0.02	0.656667	GO:001678	MF:hydrolase activity;	------	------	------	------	ENOG4111DMV	S:Function unknown	NP_197241.1	Adenine nucleotide alpha hydrolases-like superfamily protein [Arabidopsis thaliana]	------	------	PF00582.27	Usp	Universal stress protein family
AT1G17380	TIFY11A	Protein TIFY 11A [Source:UniProtKB/Swiss-Prot;Acc:Q9LDU5]	24.129	4.59267	4.07005e-22	2.01449e-20	yes	up	0.44	0.25	0.2	4.04	10.96	7.45	0.296667	7.48333	GO:2000022;GO:0009753;GO:0009611;GO:0006952;GO:0031347;GO:0005634;GO:000551	BP:regulation of jasmonic acid mediated signaling pathway;BP:response to jasmonic acid;BP:response to wounding;BP:defense response;BP:regulation of defense response;CC:nucleus;MF:protein binding;	K13464	JAZ	map04075	Plant hormone signal transduction	ENOG41108B8	K:Transcription	NP_564019.1	jasmonate-zim-domain protein 5 [Arabidopsis thaliana]	sp|Q9LDU5|TI11A_ARATH;	Protein TIFY 11A OS=Arabidopsis thaliana OX=3702 GN=TIFY11A PE=1 SV=1;	PF06200.15;PF09425.11	tify;Jas_motif	tify domain;Jas motif
AT4G15330	CYP705A1	Cytochrome P450 705A1 [Source:UniProtKB/Swiss-Prot;Acc:Q0WQ07]	23.55	4.55768	0.017428	0.0476541	yes	up	0	0	0	0.1	0.23	0.15	0	0.16	GO:0050832;GO:0046246;GO:0006952;GO:0055114;GO:0016021;GO:0016020;GO:0004497;GO:0016705;GO:0020037;GO:0016709;GO:0005506;GO:0046872;GO:001649	BP:defense response to fungus;BP:terpene biosynthetic process;BP:defense response;BP:oxidation-reduction process;CC:integral component of membrane;CC:membrane;MF:monooxygenase activity;MF:oxidoreductase activity, acting on paired donors, with incorporation or reduction of molecular oxygen;MF:heme binding;MF:oxidoreductase activity, acting on paired donors, with incorporation or reduction of molec…	K23814	CYP705A	------	------	COG2124	M:Cell wall/membrane/envelope biogenesis	NP_193268.3	cytochrome P450, family 705, subfamily A, polypeptide 1 [Arabidopsis thaliana]	sp|Q0WQ07|C7051_ARATH;	Cytochrome P450 705A1 OS=Arabidopsis thaliana OX=3702 GN=CYP705A1 PE=2 SV=1;	PF00067.23	p450	Cytochrome P450
AT1G15760		At1g15760 [Source:UniProtKB/TrEMBL;Acc:Q9LMQ8]	23.441	4.55098	0.00342427	0.0118449	yes	up	0	0.06	0	0.62	0.4	0.78	0.02	0.6	GO:0008150;GO:000551	BP:biological_process;MF:protein binding;	------	------	------	------	ENOG410Y1R0	S:Function unknown	NP_173028.1	Sterile alpha motif (SAM) domain-containing protein [Arabidopsis thaliana]	------	------	PF07647.18	SAM_2	SAM domain
AT4G11190	DIR13	Dirigent protein 13 [Source:UniProtKB/Swiss-Prot;Acc:Q9T017]	23.355	4.54565	0.0178306	0.048594	yes	up	0	0	0	0.41	0.68	0.25	0	0.446667	GO:0048046;GO:000557	CC:apoplast;CC:extracellular region;	------	------	------	------	ENOG41107HW	S:Function unknown	NP_192858.1	Disease resistance-responsive (dirigent-like protein) family protein [Arabidopsis thaliana]	sp|Q9T017|DIR13_ARATH;	Dirigent protein 13 OS=Arabidopsis thaliana OX=3702 GN=DIR13 PE=2 SV=1;	PF03018.15	Dirigent	Dirigent-like protein
AT4G28420		Probable aminotransferase TAT1 [Source:UniProtKB/Swiss-Prot;Acc:Q67Y55]	22.334	4.48117	1.1488e-07	1.06309e-06	yes	up	0	0.19	0.04	1.35	2.3	1.3	0.0766667	1.65	GO:0006520;GO:0009058;GO:0008483;GO:0016740;GO:0003824;GO:003017	BP:cellular amino acid metabolic process;BP:biosynthetic process;MF:transaminase activity;MF:transferase activity;MF:catalytic activity;MF:pyridoxal phosphate binding;	K00815	TAT	map00270;map00130;map00950;map00360;map00350;map00960;map00400	Cysteine and methionine metabolism;Ubiquinone and other terpenoid-quinone biosynthesis;Isoquinoline alkaloid biosynthesis;Phenylalanine metabolism;Tyrosine metabolism;Tropane, piperidine and pyridine alkaloid biosynthesis;Phenylalanine, tyrosine and tryptophan biosynthesis	COG0436	E:Amino acid transport and metabolism	NP_001031739.1	Tyrosine transaminase family protein [Arabidopsis thaliana]	sp|Q67Y55|TAT1_ARATH;	Probable aminotransferase TAT1 OS=Arabidopsis thaliana OX=3702 GN=At4g28420 PE=2 SV=1;	PF00155.22;PF01212.22	Aminotran_1_2;Beta_elim_lyase	Aminotransferase class I and II;Beta-eliminating lyase
AT5G27765		Transmembrane protein [Source:UniProtKB/TrEMBL;Acc:A0A1P8BD36]	22.137	4.46841	0.00277969	0.00988911	yes	up	0	0	0.67	1.56	15.03	1.46	0.223333	6.01667	GO:001602	CC:integral component of membrane;	------	------	------	------	------	------	NP_001331193.1	transmembrane protein [Arabidopsis thaliana]	------	------	------	------	------
AT5G06235		-	21.994	4.45903	0.00603541	0.0193758	yes	up	0	0	0.18	0.69	2.52	0.85	0.06	1.35333	GO:001602	CC:integral component of membrane;	------	------	------	------	ENOG411046N	S:Function unknown	NP_199001.1	transmembrane protein [Arabidopsis thaliana]	------	------	------	------	------
AT2G32990	AtGH9B8	Endoglucanase 11 [Source:UniProtKB/Swiss-Prot;Acc:O48766]	21.306	4.41321	1.42079e-18	5.04464e-17	yes	up	0.21	0.1	0.05	3.74	2.96	2.93	0.12	3.21	GO:0005975;GO:0030245;GO:0000272;GO:0071555;GO:0008152;GO:0016021;GO:0005576;GO:0016787;GO:0008810;GO:0016798;GO:000455	BP:carbohydrate metabolic process;BP:cellulose catabolic process;BP:polysaccharide catabolic process;BP:cell wall organization;BP:metabolic process;CC:integral component of membrane;CC:extracellular region;MF:hydrolase activity;MF:cellulase activity;MF:hydrolase activity, acting on glycosyl bonds;MF:hydrolase activity, hydrolyzing O-glycosyl compounds;	------	------	------	------	ENOG410XPC9	S:Function unknown	NP_180858.1	glycosyl hydrolase 9B8 [Arabidopsis thaliana]	sp|O48766|GUN11_ARATH;	Endoglucanase 11 OS=Arabidopsis thaliana OX=3702 GN=At2g32990 PE=2 SV=1;	PF00759.20	Glyco_hydro_9	Glycosyl hydrolase family 9
AT3G03050	CSLD3	Glycosyltransferase (Fragment) [Source:UniProtKB/TrEMBL;Acc:W8Q6V3]	20.984	4.39124	0.000162526	0.000800922	yes	up	0.19	0.04	0	1.77	2.54	1.58	0.0766667	1.96333	GO:0009833;GO:0097502;GO:0071555;GO:0009409;GO:0030244;GO:0005794;GO:0005783;GO:0016021;GO:0005802;GO:0000139;GO:0005886;GO:0016020;GO:0005768;GO:0016740;GO:0051753;GO:0016760;GO:001675	BP:plant-type primary cell wall biogenesis;BP:mannosylation;BP:cell wall organization;BP:response to cold;BP:cellulose biosynthetic process;CC:Golgi apparatus;CC:endoplasmic reticulum;CC:integral component of membrane;CC:trans-Golgi network;CC:Golgi membrane;CC:plasma membrane;CC:membrane;CC:endosome;MF:transferase activity;MF:mannan synthase activity;MF:cellulose synthas;MF:transferase activity,…	K20924	CSLD	------	------	COG1215	S:Function unknown	NP_186955.1	cellulose synthase-like D3 [Arabidopsis thaliana]	sp|Q9M9M4|CSLD3_ARATH;	Cellulose synthase-like protein D3 OS=Arabidopsis thaliana OX=3702 GN=CSLD3 PE=1 SV=1;	PF03552.15;PF14570.7;PF13632.7	Cellulose_synt;zf-RING_4;Glyco_trans_2_3	Cellulose synthase;RING/Ubox like zinc-binding domain;Glycosyl transferase family group 2
AT2G44578		RING/U-box superfamily protein [Source:UniProtKB/TrEMBL;Acc:A8MS73]	20.891	4.38482	7.40083e-05	0.000395958	yes	up	0.21	0	0.11	1.82	1.68	4.39	0.106667	2.63	GO:0016567;GO:0006260;GO:0007064;GO:0016021;GO:0016020;GO:003139	BP:protein ubiquitination;BP:DNA replication;BP:mitotic sister chromatid cohesion;CC:integral component of membrane;CC:membrane;CC:Ctf18 RFC-like complex;	------	------	------	------	ENOG41121N2	O:Posttranslational modification, protein turnover, chaperones	NP_001078058.1	RING/U-box superfamily protein [Arabidopsis thaliana]	sp|O22755|ATL44_ARATH;	Probable E3 ubiquitin-protein ligase ATL44 OS=Arabidopsis thaliana OX=3702 GN=ATL44 PE=2 SV=1;	PF13639.7;PF12678.8;PF17123.6;PF13923.7;PF00097.26;PF14634.7;PF13920.7;PF14447.7;PF12861.8;PF13445.7	zf-RING_2;zf-rbx1;zf-RING_11;zf-C3HC4_2;zf-C3HC4;zf-RING_5;zf-C3HC4_3;Prok-RING_4;zf-ANAPC11;zf-RING_UBOX	Ring finger domain;RING-H2 zinc finger domain;RING-like zinc finger;Zinc finger, C3HC4 type;Zinc finger, C3HC4 type;zinc-RING finger domain;Zinc finger, C3HC4 type;Prokaryotic RING finger family 4;Anaphase-promoting complex subunit 11 RING-H2 finger;RING-type zinc-finger
AT5G38010	UGT76E9	UDP-glycosyltransferase 76E9 [Source:UniProtKB/Swiss-Prot;Acc:Q9LS21]	19.702	4.30028	0.00757269	0.0235275	yes	up	0.03	0	0	0.22	0.22	0.4	0.01	0.28	GO:0043231;GO:0016757;GO:0080043;GO:0016740;GO:0080044;GO:0016758;GO:000819	CC:intracellular membrane-bounded organelle;MF:transferase activity, transferring glycosyl groups;MF:quercetin 3-O-glucosyltransferase activity;MF:transferase activity;MF:quercetin 7-O-glucosyltransferase activity;MF:transferase activity, transferring hexosyl groups;MF:UDP-glycosyltransferase activity;	------	------	------	------	COG1819	S:Function unknown	NP_198617.1	UDP-Glycosyltransferase superfamily protein [Arabidopsis thaliana]	sp|Q9LS21|U76E9_ARATH;	UDP-glycosyltransferase 76E9 OS=Arabidopsis thaliana OX=3702 GN=UGT76E9 PE=2 SV=1;	PF00201.19	UDPGT	UDP-glucoronosyl and UDP-glucosyl transferase
AT4G15320	ATCSLB06	cellulose synthase-like B6 [Source:TAIR;Acc:AT4G15320]	18.875	4.23838	5.26035e-05	0.000291156	yes	up	0.02	0.02	0.02	0.52	0.46	0.52	0.02	0.5	GO:0009833;GO:0048767;GO:0071555;GO:0030244;GO:0005794;GO:0016021;GO:0016020;GO:0000139;GO:0005886;GO:0005802;GO:0016760;GO:001675	BP:plant-type primary cell wall biogenesis;BP:root hair elongation;BP:cell wall organization;BP:cellulose biosynthetic process;CC:Golgi apparatus;CC:integral component of membrane;CC:membrane;CC:Golgi membrane;CC:plasma membrane;CC:trans-Golgi network;MF:cellulose synthas;MF:cellulose synthase activity;	------	------	------	------	COG1215	M:Cell wall/membrane/envelope biogenesis	NP_193267.1	cellulose synthase-like B6 [Arabidopsis thaliana]	sp|O23386|CSLB6_ARATH;	Cellulose synthase-like protein B6 OS=Arabidopsis thaliana OX=3702 GN=CSLB6 PE=2 SV=2;	PF03552.15;PF13632.7	Cellulose_synt;Glyco_trans_2_3	Cellulose synthase;Glycosyl transferase family group 2
AT5G19100		Eukaryotic aspartyl protease family protein [Source:UniProtKB/TrEMBL;Acc:Q3E9C8]	18.646	4.22079	0.000253498	0.00118791	yes	up	0.1	0	0	0.42	0.68	1.17	0.0333333	0.756667	GO:0030163;GO:0006508;GO:0005829;GO:0016787;GO:0004190;GO:000823	BP:protein catabolic process;BP:proteolysis;CC:cytosol;MF:hydrolase activity;MF:aspartic-type endopeptidase activity;MF:peptidase activity;	------	------	------	------	ENOG410XNV7	S:Function unknown	ABK28703.1	unknown, partial [Arabidopsis thaliana]	sp|P0DO21|GIP2_NICBE;	Probable aspartic proteinase GIP2 OS=Nicotiana benthamiana OX=4100 GN=GIP2 PE=1 SV=1;	PF14541.7;PF14543.7	TAXi_C;TAXi_N	Xylanase inhibitor C-terminal;Xylanase inhibitor N-terminal
AT1G69920	GSTU12	Glutathione S-transferase U12 [Source:UniProtKB/Swiss-Prot;Acc:Q6NMS0]	18.501	4.20954	9.88785e-09	1.09995e-07	yes	up	0.25	0.06	0.19	3	6.23	2.09	0.166667	3.77333	GO:0006749;GO:0009636;GO:0009407;GO:0005737;GO:0005634;GO:0004364;GO:0016740;GO:000551	BP:glutathione metabolic process;BP:response to toxic substance;BP:toxin catabolic process;CC:cytoplasm;CC:nucleus;MF:glutathione transferase activity;MF:transferase activity;MF:protein binding;	K00799	GST, gst	map00480	Glutathione metabolism	ENOG410XSIX	S:Function unknown	NP_177150.2	glutathione S-transferase TAU 12 [Arabidopsis thaliana]	sp|Q6NMS0|GSTUC_ARATH;	Glutathione S-transferase U12 OS=Arabidopsis thaliana OX=3702 GN=GSTU12 PE=2 SV=2;	PF13417.7;PF02798.21;PF13409.7;PF14497.7	GST_N_3;GST_N;GST_N_2;GST_C_3	Glutathione S-transferase, N-terminal domain;Glutathione S-transferase, N-terminal domain;Glutathione S-transferase, N-terminal domain;Glutathione S-transferase, C-terminal domain
AT2G34600	TIFY 5B	Protein TIFY 5B [Source:UniProtKB/Swiss-Prot;Acc:O64687]	18.489	4.20856	2.45339e-09	2.99609e-08	yes	up	1.41	4.13	6.54	49.03	96.57	126.83	4.02667	90.81	GO:2000022;GO:0010200;GO:0009753;GO:0009611;GO:0006952;GO:0031347;GO:0005634;GO:0016021;GO:000551	BP:regulation of jasmonic acid mediated signaling pathway;BP:response to chitin;BP:response to jasmonic acid;BP:response to wounding;BP:defense response;BP:regulation of defense response;CC:nucleus;CC:integral component of membrane;MF:protein binding;	------	------	------	------	ENOG41105HQ;ENOG410Z61E	K:Transcription;S:Function unknown	NP_181007.1	jasmonate-zim-domain protein 7 [Arabidopsis thaliana]	sp|O64687|TIF5B_ARATH;	Protein TIFY 5B OS=Arabidopsis thaliana OX=3702 GN=TIFY 5B PE=2 SV=1;	PF06200.15;PF09425.11	tify;Jas_motif	tify domain;Jas motif
AT3G03190	GSTF11	Glutathione S-transferase F11 [Source:UniProtKB/Swiss-Prot;Acc:Q96324]	18.474	4.20741	7.58442e-27	5.65698e-25	yes	up	0.81	0.59	0.61	10.09	19.48	16.49	0.67	15.3533	GO:0009636;GO:0009407;GO:0006749;GO:0006979;GO:0005737;GO:0005829;GO:0004364;GO:0005515;GO:0016740;GO:004329	BP:response to toxic substance;BP:toxin catabolic process;BP:glutathione metabolic process;BP:response to oxidative stress;CC:cytoplasm;CC:cytosol;MF:glutathione transferase activity;MF:protein binding;MF:transferase activity;MF:glutathione binding;	K00799	GST, gst	map00480	Glutathione metabolism	COG0625	U:Intracellular trafficking, secretion, and vesicular transport	NP_186969.1	glutathione S-transferase F11 [Arabidopsis thaliana]	sp|Q96324|GSTFB_ARATH;	Glutathione S-transferase F11 OS=Arabidopsis thaliana OX=3702 GN=GSTF11 PE=2 SV=1;	PF02798.21;PF00043.26;PF13417.7;PF13410.7;PF13409.7;PF14497.7	GST_N;GST_C;GST_N_3;GST_C_2;GST_N_2;GST_C_3	Glutathione S-transferase, N-terminal domain;Glutathione S-transferase, C-terminal domain;Glutathione S-transferase, N-terminal domain;Glutathione S-transferase, C-terminal domain;Glutathione S-transferase, N-terminal domain;Glutathione S-transferase, C-terminal domain
AT4G37290	PIP2	unknown protein; FUNCTIONS IN: molecular_function unknown; INVOLVED IN: response to karrikin; LOCATED IN: endomembrane system; EXPRESSED IN: cotyledon, hypocotyl, leaf; EXPRESSED DURING: LP.04 four leaves visible; BEST Arabidopsis thaliana protein m /.../s: unknown protein (TAIR:AT2G23270.1); Ha. [Source:TAIR;Acc:AT4G37290]	17.993	4.16936	0.000636713	0.00269449	yes	up	0.38	0	0	3.41	3.59	0.66	0.126667	2.55333	GO:0045087;GO:2000280;GO:0080167;GO:0048046;GO:000557	BP:innate immune response;BP:regulation of root development;BP:response to karrikin;CC:apoplast;CC:extracellular region;	------	------	------	------	ENOG4111317	S:Function unknown	NP_568022.1	transmembrane protein [Arabidopsis thaliana]	sp|F4JRC5|PIP2_ARATH;	PAMP-induced secreted peptide 2 OS=Arabidopsis thaliana OX=3702 GN=PIP2 PE=1 SV=1;	------	------	------
AT3G05980		At3g05980 [Source:UniProtKB/TrEMBL;Acc:Q9SFG2]	17.812	4.1548	1.09406e-05	7.0596e-05	yes	up	0	0.04	0.13	1.32	1.07	1.36	0.0566667	1.25	GO:000815	BP:biological_process;	------	------	------	------	ENOG41116B2	S:Function unknown	NP_566266.1	hypothetical protein AT3G05980 [Arabidopsis thaliana]	------	------	PF07816.12	DUF1645	Protein of unknown function
AT2G25810	TIP4-1	Aquaporin TIP4-1 [Source:UniProtKB/Swiss-Prot;Acc:O82316]	17.778	4.15205	0.0140802	0.0399969	yes	up	0	0	0.05	0.69	0.35	0.16	0.0166667	0.4	GO:0006833;GO:0055085;GO:0042807;GO:0005773;GO:0016021;GO:0016020;GO:0009705;GO:0005774;GO:0015250;GO:001526	BP:water transport;BP:transmembrane transport;CC:central vacuole;CC:vacuole;CC:integral component of membrane;CC:membrane;CC:plant-type vacuole membrane;CC:vacuolar membrane;MF:water channel activity;MF:channel activity;	K09873	TIP	------	------	COG0580	S:Function unknown	NP_180152.1;	;[Arabidopsis thaliana]	sp|O82316|TIP41_ARATH;	Aquaporin TIP4-1 OS=Arabidopsis thaliana OX=3702 GN=TIP4-1 PE=2 SV=1;	PF00230.21	MIP	Major intrinsic protein
AT5G37690		GDSL esterase/lipase At5g37690 [Source:UniProtKB/Swiss-Prot;Acc:Q9FHQ1]	17.686	4.14457	5.41401e-10	7.30059e-09	yes	up	0.12	0.12	0.08	2.38	1.72	2.56	0.106667	2.22	GO:0006629;GO:0016042;GO:0005576;GO:0016787;GO:001678	BP:lipid metabolic process;BP:lipid catabolic process;CC:extracellular region;MF:hydrolase activity;MF:hydrolase activity, acting on ester bonds;	------	------	------	------	COG3240	S:Function unknown	NP_198585.2	SGNH hydrolase-type esterase superfamily protein [Arabidopsis thaliana]	sp|Q9FHQ1|GDL80_ARATH;	GDSL esterase/lipase At5g37690 OS=Arabidopsis thaliana OX=3702 GN=At5g37690 PE=2 SV=1;	PF00657.23	Lipase_GDSL	GDSL-like Lipase/Acylhydrolase
AT5G38970	CYP85A1	Cytochrome P450 85A1 [Source:UniProtKB/Swiss-Prot;Acc:Q9FMA5]	17.585	4.1363	0.00181688	0.00679937	yes	up	0.03	0.03	0	0.63	0.28	0.34	0.02	0.416667	GO:0006629;GO:0016132;GO:0010268;GO:0016125;GO:0006694;GO:0007275;GO:0055114;GO:0016020;GO:0016021;GO:0004497;GO:0020037;GO:0016705;GO:0005506;GO:0046872;GO:001649	BP:lipid metabolic process;BP:brassinosteroid biosynthetic process;BP:brassinosteroid homeostasis;BP:sterol metabolic process;BP:steroid biosynthetic process;BP:multicellular organism development;BP:oxidation-reduction process;CC:membrane;CC:integral component of membrane;MF:monooxygenase activity;MF:heme binding;MF:oxidoreductase activity, acting on paired donors, with incorporation or reduction…	K09590	CYP85A1, BR6OX1	map00905	Brassinosteroid biosynthesis	COG2124	Q:Secondary metabolites biosynthesis, transport and catabolism	NP_851105.1	brassinosteroid-6-oxidase 1 [Arabidopsis thaliana]	sp|Q9FMA5|C85A1_ARATH;	Cytochrome P450 85A1 OS=Arabidopsis thaliana OX=3702 GN=CYP85A1 PE=2 SV=1;	PF00067.23	p450	Cytochrome P450
AT3G14225	GLIP4	GDSL esterase/lipase 4 [Source:UniProtKB/Swiss-Prot;Acc:Q9LJP1]	17.54	4.13259	0.000622252	0.00264005	yes	up	0	0.15	0	0.36	1.77	1.08	0.05	1.07	GO:0006629;GO:0016042;GO:0016021;GO:0005576;GO:0005774;GO:0016787;GO:0016788;GO:001629	BP:lipid metabolic process;BP:lipid catabolic process;CC:integral component of membrane;CC:extracellular region;CC:vacuolar membrane;MF:hydrolase activity;MF:hydrolase activity, acting on ester bonds;MF:lipase activity;	------	------	------	------	ENOG410YF1N;COG3240	S:Function unknown;	NP_188039.1	GDSL-motif lipase 4 [Arabidopsis thaliana]	sp|Q9LJP1|GRIP4_ARATH;	GDSL esterase/lipase 4 OS=Arabidopsis thaliana OX=3702 GN=GLIP4 PE=2 SV=2;	PF00657.23	Lipase_GDSL	GDSL-like Lipase/Acylhydrolase
AT5G44420	PDF1.2A	Defensin-like protein 16 [Source:UniProtKB/Swiss-Prot;Acc:Q9FI23]	17.19	4.10352	6.73058e-39	1.01105e-36	yes	up	1.45	3.63	1.75	53.86	48.95	38.46	2.27667	47.09	GO:0050832;GO:0009753;GO:0031640;GO:0009861;GO:0009625;GO:0009723;GO:0006952;GO:0005576;GO:000551	BP:defense response to fungus;BP:response to jasmonic acid;BP:killing of cells of other organism;BP:jasmonic acid and ethylene-dependent systemic resistance;BP:response to insect;BP:response to ethylene;BP:defense response;CC:extracellular region;MF:protein binding;	K20727	PDF1.2	map04016	MAPK signaling pathway - plant	ENOG41104P4	U:Intracellular trafficking, secretion, and vesicular transport	NP_199255.1	plant defensin 1.2 [Arabidopsis thaliana]	sp|Q9FI23|DEF16_ARATH;	Defensin-like protein 16 OS=Arabidopsis thaliana OX=3702 GN=PDF1.2A PE=2 SV=1;	PF00304.21	Gamma-thionin	Gamma-thionin family
AT1G17745	PGDH	D-3-phosphoglycerate dehydrogenase [Source:TAIR;Acc:AT1G17745]	17.117	4.09738	2.59212e-93	4.64011e-90	yes	up	0.82	0.74	0.89	15.95	19.76	16.4	0.816667	17.37	GO:0006564;GO:0006520;GO:0055114;GO:0005829;GO:0009570;GO:0005634;GO:0009507;GO:0016616;GO:0051287;GO:000461	BP:L-serine biosynthetic process;BP:cellular amino acid metabolic process;BP:oxidation-reduction process;CC:cytosol;CC:chloroplast stroma;CC:nucleus;CC:chloroplast;MF:oxidoreductase activity, acting on the CH-OH group of donors, NAD or NADP as acceptor;MF:NAD binding;MF:phosphoglycerate dehydrogenase activity;	K00058	serA, PHGDH	map00270;map00260	Cysteine and methionine metabolism;Glycine, serine and threonine metabolism	COG0111	E:Amino acid transport and metabolism	NP_001031061.2	D-3-phosphoglycerate dehydrogenase [Arabidopsis thaliana]	sp|O04130|SERA2_ARATH;	D-3-phosphoglycerate dehydrogenase 2, chloroplastic OS=Arabidopsis thaliana OX=3702 GN=PGDH2 PE=1 SV=2;	PF02826.20;PF00389.31;PF01842.26;PF07991.13;PF00670.22	2-Hacid_dh_C;2-Hacid_dh;ACT;IlvN;AdoHcyase_NAD	D-isomer specific 2-hydroxyacid dehydrogenase, NAD binding domain;D-isomer specific 2-hydroxyacid dehydrogenase, catalytic domain;ACT domain;Acetohydroxy acid isomeroreductase, NADPH-binding domain;S-adenosyl-L-homocysteine hydrolase, NAD binding domain
AT2G27402		At2g27402 [Source:UniProtKB/TrEMBL;Acc:Q8GX30]	16.681	4.06013	4.19712e-24	2.55406e-22	yes	up	0.69	0.84	0.13	10.69	11.12	12.07	0.553333	11.2933	GO:0008150;GO:0005575;GO:0042644;GO:0009508;GO:000367	BP:biological_process;CC:cellular_component;CC:chloroplast nucleoid;CC:plastid chromosome;MF:molecular_function;	------	------	------	------	ENOG4112CJ0	S:Function unknown	NP_001323810.1	plastid transcriptionally active 18 [Arabidopsis thaliana]	sp|Q1G3B8|Y2272_ARATH;	B3 domain-containing protein At2g32645 OS=Arabidopsis thaliana OX=3702 GN=At2g32645 PE=2 SV=2;	------	------	------
AT5G14700		Cinnamoyl CoA reductase-like protein [Source:UniProtKB/TrEMBL;Acc:Q9LYJ0]	16.676	4.05972	3.82294e-25	2.57432e-23	yes	up	0.71	0.78	0.29	6.65	17.03	12.58	0.593333	12.0867	GO:0006694;GO:0005575;GO:0050662;GO:0016616;GO:0003824;GO:0003854;GO:001649	BP:steroid biosynthetic process;CC:cellular_component;MF:coenzyme binding;MF:oxidoreductase activity, acting on the CH-OH group of donors, NAD or NADP as acceptor;MF:catalytic activity;MF:3-beta-hydroxy-delta5-steroid dehydrogenase activity;MF:oxidoreductase activity;	------	------	------	------	COG0451	S:Function unknown	NP_196974.1	NAD(P)-binding Rossmann-fold superfamily protein [Arabidopsis thaliana]	sp|Q0JKZ0|SNL6_ORYSJ;	Cinnamoyl-CoA reductase-like SNL6 OS=Oryza sativa subsp. japonica OX=39947 GN=SNL6 PE=3 SV=1;	PF01370.22;PF01073.20;PF13460.7;PF00106.26	Epimerase;3Beta_HSD;NAD_binding_10;adh_short	NAD dependent epimerase/dehydratase family;3-beta hydroxysteroid dehydrogenase/isomerase family;NA;short chain dehydrogenase
AT3G15270	SPL5	SPL5 [Source:UniProtKB/TrEMBL;Acc:A0A178VL13]	16.596	4.05276	0.00216854	0.00792621	yes	up	0	0.03	0.03	0.36	0.49	0.33	0.02	0.393333	GO:0010321;GO:0006355;GO:0009908;GO:0005737;GO:0005634;GO:0003700;GO:0003677;GO:004687	BP:regulation of vegetative phase change;BP:regulation of transcription, DNA-templated;BP:flower development;CC:cytoplasm;CC:nucleus;MF:transcription factor activity, sequence-specific DNA binding;MF:DNA binding;MF:metal ion binding;	------	------	------	------	ENOG410YKCI	T:Signal transduction mechanisms	EOA31451.1	hypothetical protein CARUB_v10014636mg, partial [Capsella rubella]	sp|Q9S758|SPL5_ARATH;	Squamosa promoter-binding-like protein 5 OS=Arabidopsis thaliana OX=3702 GN=SPL5 PE=2 SV=1;	PF03110.15	SBP	SBP domain
AT4G14380		Cotton fiber protein [Source:UniProtKB/TrEMBL;Acc:O23294]	16.573	4.05074	1.50043e-05	9.38029e-05	yes	up	0.1	0.05	0.05	1.2	1.3	1.52	0.0666667	1.34	GO:000815	BP:biological_process;	------	------	------	------	ENOG4111DT3	S:Function unknown	NP_193174.1	cotton fiber protein [Arabidopsis thaliana]	------	------	PF05553.12	DUF761	Cotton fibre expressed protein
AT3G50280		Uncharacterized acetyltransferase At3g50280 [Source:UniProtKB/Swiss-Prot;Acc:Q9SND9]	16.414	4.03686	9.16565e-13	1.70909e-11	yes	up	0.19	0.06	0.16	2.04	2.51	3.75	0.136667	2.76667	GO:0016740;GO:0016746;GO:001674	MF:transferase activity;MF:transferase activity, transferring acyl groups;MF:transferase activity, transferring acyl groups other than amino-acyl groups;	------	------	------	------	ENOG410YEZS	S:Function unknown	NP_190597.1	HXXXD-type acyl-transferase family protein [Arabidopsis thaliana]	sp|Q9SND9|Y3028_ARATH;	Uncharacterized acetyltransferase At3g50280 OS=Arabidopsis thaliana OX=3702 GN=At3g50280 PE=3 SV=1;	PF02458.16	Transferase	Transferase family
AT5G21960	ERF016	Ethylene-responsive transcription factor ERF016 [Source:UniProtKB/Swiss-Prot;Acc:Q9C591]	16.389	4.03464	0.000633533	0.00268178	yes	up	0.07	0.04	0	0.49	1.37	0.34	0.0366667	0.733333	GO:0006355;GO:0009873;GO:0005634;GO:0003700;GO:000367	BP:regulation of transcription, DNA-templated;BP:ethylene-activated signaling pathway;CC:nucleus;MF:transcription factor activity, sequence-specific DNA binding;MF:DNA binding;	------	------	------	------	ENOG410YZF0	K:Transcription	NP_680184.1	Integrase-type DNA-binding superfamily protein [Arabidopsis thaliana]	sp|Q9C591|ERF16_ARATH;	Ethylene-responsive transcription factor ERF016 OS=Arabidopsis thaliana OX=3702 GN=ERF016 PE=2 SV=1;	PF00847.21	AP2	AP2 domain
AT1G66860		Class I glutamine amidotransferase-like superfamily protein [Source:UniProtKB/TrEMBL;Acc:Q9C9N8]	16.261	4.02335	2.00676e-08	2.11829e-07	yes	up	0.11	0.11	0.08	1.14	1.9	2.87	0.1	1.97	GO:0006541;GO:0016787;GO:001674	BP:glutamine metabolic process;MF:hydrolase activity;MF:transferase activity;	------	------	------	------	COG2071	S:Function unknown	NP_564885.1	Class I glutamine amidotransferase-like superfamily protein [Arabidopsis thaliana]	sp|Q8H0Z4|GT121_ARATH;	Putative glutamine amidotransferase GAT1_2.1 OS=Arabidopsis thaliana OX=3702 GN=GAT1_2.1 PE=2 SV=1;	PF07722.14;PF00117.29	Peptidase_C26;GATase	Peptidase C26;Glutamine amidotransferase class-I
AT2G42370		Uncharacterized protein At2g42370 [Source:UniProtKB/TrEMBL;Acc:Q9SLC2]	15.871	3.98833	0.0126721	0.0365678	yes	up	0	0	0.06	0.82	0.13	0.06	0.02	0.336667	GO:0009718;GO:0030674;GO:003037	BP:anthocyanin-containing compound biosynthetic process;MF:protein binding, bridging;MF:translation repressor activity;	------	------	------	------	ENOG410XQS3	S:Function unknown	NP_181766.1	hypothetical protein AT2G42370 [Arabidopsis thaliana]	------	------	------	------	------
AT1G30370		DLAH [Source:UniProtKB/TrEMBL;Acc:A0A178W2K8]	15.747	3.97699	0.00156373	0.00596315	yes	up	0.28	0.15	0.03	0.59	7.11	1.11	0.153333	2.93667	GO:0010214;GO:0006629;GO:0005739;GO:0016787;GO:0008970;GO:000462	BP:seed coat development;BP:lipid metabolic process;CC:mitochondrion;MF:hydrolase activity;MF:phosphatidylcholine 1-acylhydrolase activity;MF:phospholipase activity;	------	------	------	------	ENOG410Y1GR	S:Function unknown	NP_174326.1	alpha/beta-Hydrolases superfamily protein [Arabidopsis thaliana]	sp|Q941F1|PLA15_ARATH;	Phospholipase A1-Igamma1, chloroplastic OS=Arabidopsis thaliana OX=3702 GN=At1g06800 PE=1 SV=2;	PF01764.26	Lipase_3	Lipase
AT5G43890	YUC5	Flavin-containing monooxygenase [Source:UniProtKB/TrEMBL;Acc:A0A178UK83]	15.263	3.93198	0.000575885	0.0024623	yes	up	0	0.06	0.03	0.38	0.45	0.88	0.03	0.57	GO:0009723;GO:0009851;GO:0055114;GO:0016021;GO:0016020;GO:0005575;GO:0004497;GO:0050660;GO:0103075;GO:0004499;GO:0050661;GO:001649	BP:response to ethylene;BP:auxin biosynthetic process;BP:oxidation-reduction process;CC:integral component of membrane;CC:membrane;CC:cellular_component;MF:monooxygenase activity;MF:flavin adenine dinucleotide binding;MF:indole-3-pyruvate monooxygenase activity;MF:N,N-dimethylaniline monooxygenase activity;MF:NADP binding;MF:oxidoreductase activity;	K11816	YUCCA	map00380	Tryptophan metabolism	COG2072	S:Function unknown	NP_199202.1	Flavin-binding monooxygenase family protein [Arabidopsis thaliana]	sp|Q9LKC0|YUC5_ARATH;	Probable indole-3-pyruvate monooxygenase YUCCA5 OS=Arabidopsis thaliana OX=3702 GN=YUC5 PE=2 SV=1;	PF00743.20;PF13738.7;PF13434.7;PF07992.15;PF13450.7;PF01494.20;PF01266.25	FMO-like;Pyr_redox_3;K_oxygenase;Pyr_redox_2;NAD_binding_8;FAD_binding_3;DAO	Flavin-binding monooxygenase-like;Pyridine nucleotide-disulphide oxidoreductase;L-lysine 6-monooxygenase;Pyridine nucleotide-disulphide oxidoreductase;NA;FAD binding domain;FAD dependent oxidoreductase
AT5G64905	PEP3	Elicitor peptide 3 [Source:UniProtKB/Swiss-Prot;Acc:Q8LAX3]	15.203	3.92624	0.00341187	0.0118077	yes	up	0	1.88	0.36	6.15	26.59	8.77	0.746667	13.8367	GO:0006952;GO:0045087;GO:007145	BP:defense response;BP:innate immune response;BP:cellular response to hypoxia;	------	------	------	------	ENOG41107BR	S:Function unknown	AAM65093.1	unknown [Arabidopsis thaliana]	sp|Q8LAX3|PEP3_ARATH;	Elicitor peptide 3 OS=Arabidopsis thaliana OX=3702 GN=PEP3 PE=3 SV=2;	PF17232.3	Pep1_7	Elicitor peptide 1-7
AT4G00670		At4g00670 [Source:UniProtKB/TrEMBL;Acc:Q6IDB4]	15.059	3.91251	6.05489e-07	4.98907e-06	yes	up	0.53	0.38	0.18	5.58	6.67	6.61	0.363333	6.28667	GO:0030042;GO:0015629;GO:000377	BP:actin filament depolymerization;CC:actin cytoskeleton;MF:actin binding;	------	------	------	------	ENOG41122P5	L:Replication, recombination and repair	NP_191976.2	Remorin family protein [Arabidopsis thaliana]	------	------	PF03763.14	Remorin_C	Remorin, C-terminal region
AT3G26830	CYP71B15	Bifunctional dihydrocamalexate synthase/camalexin synthase [Source:UniProtKB/Swiss-Prot;Acc:Q9LW27]	14.971	3.90413	4.54741e-30	4.1924e-28	yes	up	0.59	0.41	0.35	6.85	11.14	6.88	0.45	8.29	GO:0010120;GO:0009414;GO:0009737;GO:0009617;GO:0050832;GO:0055114;GO:0010112;GO:0006952;GO:0009700;GO:0009625;GO:0005783;GO:0016021;GO:0016020;GO:0043231;GO:0005576;GO:0004497;GO:0016705;GO:0010298;GO:0016491;GO:0016709;GO:0005506;GO:0046872;GO:002003	BP:camalexin biosynthetic process;BP:response to water deprivation;BP:response to abscisic acid;BP:response to bacterium;BP:defense response to fungus;BP:oxidation-reduction process;BP:regulation of systemic acquired resistance;BP:defense response;BP:indole phytoalexin biosynthetic process;BP:response to insect;CC:endoplasmic reticulum;CC:integral component of membrane;CC:membrane;CC:intracellula…	K20559	CYP71B15	map04016	MAPK signaling pathway - plant	COG2124	I:Lipid transport and metabolism	NP_189318.1	Cytochrome P450 superfamily protein [Arabidopsis thaliana]	sp|Q9LW27|C71BF_ARATH;	Bifunctional dihydrocamalexate synthase/camalexin synthase OS=Arabidopsis thaliana OX=3702 GN=CYP71B15 PE=1 SV=1;	PF00067.23	p450	Cytochrome P450
AT1G76620		At1g76620/F14G6_22 [Source:UniProtKB/TrEMBL;Acc:Q8W4R7]	14.608	3.86865	2.20219e-20	9.27555e-19	yes	up	0.13	0.25	0.19	3.56	3.34	3.31	0.19	3.40333	------	------	------	------	------	------	ENOG410YF33	S:Function unknown	NP_565137.1	Serine/Threonine-kinase, putative (Protein of unknown function, DUF547) [Arabidopsis thaliana]	------	------	PF04784.15;PF14389.7	DUF547;Lzipper-MIP1	Protein of unknown function, DUF547;Leucine-zipper of ternary complex factor MIP1
AT1G75300		At1g75300 [Source:UniProtKB/TrEMBL;Acc:Q9FRM1]	14.602	3.86805	0.00914971	0.0275806	yes	up	0	0.11	0	0.64	0.2	1.03	0.0366667	0.623333	GO:000573	CC:mitochondrion;	K23050	PCBER1	------	------	ENOG41129ZG;ENOG410Y0DY	S:Function unknown;	NP_177665.1	NmrA-like negative transcriptional regulator family protein [Arabidopsis thaliana]	sp|P52577|IFRH_ARATH;	Isoflavone reductase homolog P3 OS=Arabidopsis thaliana OX=3702 GN=At1g75280 PE=2 SV=1;	PF05368.14;PF13460.7;PF01370.22;PF01073.20;PF16363.6;PF03435.19	NmrA;NAD_binding_10;Epimerase;3Beta_HSD;GDP_Man_Dehyd;Sacchrp_dh_NADP	NmrA-like family;NA;NAD dependent epimerase/dehydratase family;3-beta hydroxysteroid dehydrogenase/isomerase family;GDP-mannose 4,6 dehydratase;Saccharopine dehydrogenase NADP binding domain
AT2G30670		Tropinone reductase homolog At2g30670 [Source:UniProtKB/Swiss-Prot;Acc:O49332]	14.164	3.82417	0.0071804	0.0224516	yes	up	0.06	0.06	0	1.22	0.55	0.31	0.04	0.693333	GO:0055114;GO:0005575;GO:001649	BP:oxidation-reduction process;CC:cellular_component;MF:oxidoreductase activity;	K08081	TR1	map00960	Tropane, piperidine and pyridine alkaloid biosynthesis	COG1028	I:Lipid transport and metabolism	NP_180625.1	NAD(P)-binding Rossmann-fold superfamily protein [Arabidopsis thaliana]	sp|O49332|TRNHE_ARATH;	Tropinone reductase homolog At2g30670 OS=Arabidopsis thaliana OX=3702 GN=At2g30670 PE=3 SV=1;	PF13561.7;PF00106.26;PF08659.11	adh_short_C2;adh_short;KR	Enoyl;short chain dehydrogenase;KR domain
AT4G12735		At4g12735 [Source:UniProtKB/TrEMBL;Acc:Q8LCC1]	14.123	3.81997	0.00563086	0.0181972	yes	up	0	0.17	0.18	2.99	1.59	1.32	0.116667	1.96667	GO:0008150;GO:0005777;GO:0005886;GO:000367	BP:biological_process;CC:peroxisome;CC:plasma membrane;MF:molecular_function;	------	------	------	------	ENOG411086N;COG5648	S:Function unknown;B:Chromatin structure and dynamics	NP_974539.1	hypothetical protein AT4G12735 [Arabidopsis thaliana]	------	------	------	------	------
AT5G28237		Tryptophan synthase [Source:UniProtKB/TrEMBL;Acc:F4K727]	14.055	3.81299	0.00905857	0.0273297	yes	up	0.07	0	0	0.16	0.61	0.38	0.0233333	0.383333	GO:0008652;GO:0000162;GO:0006568;GO:0009073;GO:0005737;GO:0016829;GO:000483	BP:cellular amino acid biosynthetic process;BP:tryptophan biosynthetic process;BP:tryptophan metabolic process;BP:aromatic amino acid family biosynthetic process;CC:cytoplasm;MF:lyase activity;MF:tryptophan synthase activity;	K01696	trpB	map00400;map00260	Phenylalanine, tyrosine and tryptophan biosynthesis;Glycine, serine and threonine metabolism	COG0133	O:Posttranslational modification, protein turnover, chaperones	NP_974844.1	Pyridoxal-5'-phosphate-dependent enzyme family protein [Arabidopsis thaliana]	sp|O50046|TRPB_CAMAC;	Tryptophan synthase beta chain 2, chloroplastic OS=Camptotheca acuminata OX=16922 GN=TSB PE=2 SV=1;	PF00291.26	PALP	Pyridoxal-phosphate dependent enzyme
AT1G25422		Putative uncharacterized protein [Source:UniProtKB/TrEMBL;Acc:Q1G3T8]	13.979	3.80515	0.0108362	0.031911	yes	up	0	0.11	0	0.48	1.19	0.22	0.0366667	0.63	GO:0008150;GO:000367	BP:biological_process;MF:molecular_function;	------	------	------	------	ENOG41106ER	S:Function unknown	NP_001154366.1	hypothetical protein AT1G25422 [Arabidopsis thaliana]	------	------	------	------	------
AT5G07690	MYB29	Transcription factor MYB29 [Source:UniProtKB/Swiss-Prot;Acc:Q9FLR1]	13.789	3.78546	9.60405e-20	3.77157e-18	yes	up	0.32	0.27	0.19	4.46	5.47	3.48	0.26	4.47	GO:0031930;GO:0030154;GO:2000070;GO:0009414;GO:0010105;GO:0009755;GO:0009617;GO:0009867;GO:0009611;GO:0009682;GO:0050832;GO:0009644;GO:0009819;GO:0009625;GO:0006355;GO:0010438;GO:0010439;GO:1905255;GO:0005634;GO:0003677;GO:0043565;GO:0044212;GO:0003700;GO:0000976;GO:000551	BP:mitochondria-nucleus signaling pathway;BP:cell differentiation;BP:regulation of response to water deprivation;BP:response to water deprivation;BP:negative regulation of ethylene-activated signaling pathway;BP:hormone-mediated signaling pathway;BP:response to bacterium;BP:jasmonic acid mediated signaling pathway;BP:response to wounding;BP:induced systemic resistance;BP:defense response to fungu…	K09422	MYBP	------	------	COG5147	S:Function unknown	NP_196386.1	myb domain protein 29 [Arabidopsis thaliana]	sp|Q9FLR1|MYB29_ARATH;	Transcription factor MYB29 OS=Arabidopsis thaliana OX=3702 GN=MYB29 PE=1 SV=1;	PF00249.32;PF13921.7	Myb_DNA-binding;Myb_DNA-bind_6	Myb-like DNA-binding domain;Myb-like DNA-binding domain
AT2G29470	GSTU3	Glutathione S-transferase U3 [Source:UniProtKB/Swiss-Prot;Acc:Q9ZW28]	13.665	3.77246	0.0015759	0.00600532	yes	up	0	0.17	0.18	0.71	5	0.12	0.116667	1.94333	GO:0006749;GO:0009636;GO:0009407;GO:0005737;GO:0005829;GO:0004364;GO:0016740;GO:000551	BP:glutathione metabolic process;BP:response to toxic substance;BP:toxin catabolic process;CC:cytoplasm;CC:cytosol;MF:glutathione transferase activity;MF:transferase activity;MF:protein binding;	K00799	GST, gst	map00480	Glutathione metabolism	ENOG410XSIX	O:Posttranslational modification, protein turnover, chaperones	NP_180508.1	glutathione S-transferase tau 3 [Arabidopsis thaliana]	sp|Q9ZW28|GSTU3_ARATH;	Glutathione S-transferase U3 OS=Arabidopsis thaliana OX=3702 GN=GSTU3 PE=2 SV=1;	PF13417.7;PF02798.21;PF13409.7;PF13410.7;PF17172.5;PF00043.26	GST_N_3;GST_N;GST_N_2;GST_C_2;GST_N_4;GST_C	Glutathione S-transferase, N-terminal domain;Glutathione S-transferase, N-terminal domain;Glutathione S-transferase, N-terminal domain;Glutathione S-transferase, C-terminal domain;Glutathione S-transferase N-terminal domain;Glutathione S-transferase, C-terminal domain
AT1G19940	AtGH9B5	Endoglucanase 2 [Source:UniProtKB/Swiss-Prot;Acc:Q9FXI9]	13.646	3.7704	0.00757659	0.0235328	yes	up	0.05	0	0	0.28	0.29	0.35	0.0166667	0.306667	GO:0005975;GO:0030245;GO:0000272;GO:0071555;GO:0008152;GO:0016021;GO:0005576;GO:0016787;GO:0008810;GO:0016798;GO:000455	BP:carbohydrate metabolic process;BP:cellulose catabolic process;BP:polysaccharide catabolic process;BP:cell wall organization;BP:metabolic process;CC:integral component of membrane;CC:extracellular region;MF:hydrolase activity;MF:cellulase activity;MF:hydrolase activity, acting on glycosyl bonds;MF:hydrolase activity, hydrolyzing O-glycosyl compounds;	------	------	------	------	ENOG410XPC9	G:Carbohydrate transport and metabolism	NP_001321680.1	glycosyl hydrolase 9B5 [Arabidopsis thaliana]	sp|Q9FXI9|GUN2_ARATH;	Endoglucanase 2 OS=Arabidopsis thaliana OX=3702 GN=At1g19940 PE=2 SV=1;	PF00759.20	Glyco_hydro_9	Glycosyl hydrolase family 9
AT5G24640		Gb [Source:UniProtKB/TrEMBL;Acc:Q9FLU0]	13.618	3.7674	0.00843801	0.0257577	yes	up	0	0	0.33	1.52	2.72	1.07	0.11	1.77	GO:0009061;GO:0008150;GO:0005737;GO:000563	BP:anaerobic respiration;BP:biological_process;CC:cytoplasm;CC:nucleus;	------	------	------	------	ENOG411057S	S:Function unknown	NP_197852.1	hypothetical protein AT5G24640 [Arabidopsis thaliana]	------	------	------	------	------
AT3G12145	FLR1	FTM4 [Source:UniProtKB/TrEMBL;Acc:A0A178V9V7]	13.563	3.76162	1.58381e-24	9.94788e-23	yes	up	0.65	0.73	0.62	6.98	9.83	16.73	0.666667	11.18	GO:0048574;GO:0048510;GO:0010228;GO:0005737;GO:0016020;GO:0005634;GO:0005886;GO:0048471;GO:0005515;GO:000813	BP:long-day photoperiodism, flowering;BP:regulation of timing of transition from vegetative to reproductive phase;BP:vegetative to reproductive phase transition of meristem;CC:cytoplasm;CC:membrane;CC:nucleus;CC:plasma membrane;CC:perinuclear region of cytoplasm;MF:protein binding;MF:transcription factor binding;	------	------	------	------	ENOG41107RG	S:Function unknown	NP_974291.4	Leucine-rich repeat (LRR) family protein [Arabidopsis thaliana]	sp|Q9LH52|FLOR1_ARATH;	Leucine-rich repeat protein FLOR 1 OS=Arabidopsis thaliana OX=3702 GN=FLR1 PE=1 SV=1;	PF13855.7;PF08263.13;PF12799.8	LRR_8;LRRNT_2;LRR_4	Leucine rich repeat;Leucine rich repeat N-terminal domain;Leucine Rich repeats
AT4G23200	CRK12	cysteine-rich RLK (RECEPTOR-like protein kinase) 12 [Source:TAIR;Acc:AT4G23200]	13.538	3.75899	5.61658e-06	3.83746e-05	yes	up	0.18	0.83	0.13	6.49	4.49	8.49	0.38	6.49	GO:0006468;GO:0016310;GO:0042742;GO:0016020;GO:0016021;GO:0005886;GO:0004672;GO:0106311;GO:0000166;GO:0004674;GO:0016740;GO:0016301;GO:0005524;GO:010631	BP:protein phosphorylation;BP:phosphorylation;BP:defense response to bacterium;CC:membrane;CC:integral component of membrane;CC:plasma membrane;MF:protein kinase activity;MF:old GO;MF:nucleotide binding;MF:protein serine/threonine kinase activity;MF:transferase activity;MF:kinase activity;MF:ATP binding;MF:old GO;	K04733	IRAK4	------	------	COG0515	T:Signal transduction mechanisms	NP_001320040.1	cysteine-rich RLK (RECEPTOR-like protein kinase) 12 [Arabidopsis thaliana]	sp|O65472|CRK12_ARATH;	Putative cysteine-rich receptor-like protein kinase 12 OS=Arabidopsis thaliana OX=3702 GN=CRK12 PE=3 SV=3;	PF07714.18;PF00069.26;PF01657.18;PF08693.11	PK_Tyr_Ser-Thr;Pkinase;Stress-antifung;SKG6	Protein tyrosine and serine/threonine kinase;Protein kinase domain;Salt stress response/antifungal;Transmembrane alpha-helix domain
AT1G27940	ABCB13	PGP13 [Source:UniProtKB/TrEMBL;Acc:A0A178W4F4]	13.535	3.75866	5.44172e-05	0.000300035	yes	up	0	0.01	0.05	0.45	0.37	0.24	0.02	0.353333	GO:0055085;GO:0016021;GO:0016020;GO:0042626;GO:0000166;GO:0016887;GO:000552	BP:transmembrane transport;CC:integral component of membrane;CC:membrane;MF:ATPase activity, coupled to transmembrane movement of substances;MF:nucleotide binding;MF:ATPase activity;MF:ATP binding;	K05658	ABCB1, CD243	map02010	ABC transporters	COG1132	V:Defense mechanisms	NP_174115.1	P-glycoprotein 13 [Arabidopsis thaliana]	sp|Q9C7F8|AB13B_ARATH;	ABC transporter B family member 13 OS=Arabidopsis thaliana OX=3702 GN=ABCB13 PE=3 SV=1;	PF00664.24;PF00005.28;PF02463.20;PF13191.7;PF13555.7;PF13401.7;PF03193.17;PF09818.10	ABC_membrane;ABC_tran;SMC_N;AAA_16;AAA_29;AAA_22;RsgA_GTPase;ABC_ATPase	ABC transporter transmembrane region;ABC transporter;RecF/RecN/SMC N terminal domain;AAA ATPase domain;P-loop containing region of AAA domain;AAA domain;RsgA GTPase;Predicted ATPase of the ABC class
AT2G39030	NATA1	L-ornithine N5-acetyltransferase NATA1 [Source:UniProtKB/Swiss-Prot;Acc:Q9ZV05]	13.137	3.71554	2.25772e-05	0.000135973	yes	up	0.17	0	0.23	3.79	1.39	1.07	0.133333	2.08333	GO:0009753;GO:0006591;GO:0006952;GO:0008080;GO:0016740;GO:0016746;GO:001674	BP:response to jasmonic acid;BP:ornithine metabolic process;BP:defense response;MF:N-acetyltransferase activity;MF:transferase activity;MF:transferase activity, transferring acyl groups;MF:transferase activity, transferring acyl groups other than amino-acyl groups;	K22883	NATA1	------	------	COG0454;ENOG4111PFJ	K:Transcription;S:Function unknown	NP_565898.1	Acyl-CoA N-acyltransferases (NAT) superfamily protein [Arabidopsis thaliana]	sp|Q9ZV05|NATA1_ARATH;	L-ornithine N5-acetyltransferase NATA1 OS=Arabidopsis thaliana OX=3702 GN=NATA1 PE=2 SV=1;	PF00583.26;PF13508.8;PF13673.8;PF08445.11	Acetyltransf_1;Acetyltransf_7;Acetyltransf_10;FR47	Acetyltransferase;Acetyltransferase;Acetyltransferase;FR47-like protein
AT1G33760	ERF022	Ethylene-responsive transcription factor ERF022 [Source:UniProtKB/Swiss-Prot;Acc:Q9LQ28]	12.917	3.69122	0.000123603	0.000627093	yes	up	0.05	0	0.26	1.14	0.82	2.94	0.103333	1.63333	GO:0006355;GO:0009873;GO:0005634;GO:0003700;GO:000367	BP:regulation of transcription, DNA-templated;BP:ethylene-activated signaling pathway;CC:nucleus;MF:transcription factor activity, sequence-specific DNA binding;MF:DNA binding;	------	------	------	------	ENOG4111977	K:Transcription	NP_174636.1	Integrase-type DNA-binding superfamily protein [Arabidopsis thaliana]	sp|Q9LQ28|ERF22_ARATH;	Ethylene-responsive transcription factor ERF022 OS=Arabidopsis thaliana OX=3702 GN=ERF022 PE=2 SV=1;	PF00847.21	AP2	AP2 domain
AT1G66390	MYB90	Transcription factor MYB90 [Source:UniProtKB/Swiss-Prot;Acc:Q9ZTC3]	12.786	3.67653	2.60795e-10	3.64722e-09	yes	up	0.38	0.12	0.38	6.13	2.98	4.5	0.293333	4.53667	GO:0009733;GO:0019430;GO:0009745;GO:0030154;GO:0009867;GO:0009718;GO:0009723;GO:0006355;GO:0080167;GO:0002239;GO:0031542;GO:0031540;GO:0005634;GO:0043565;GO:0005515;GO:0044212;GO:0003700;GO:000367	BP:response to auxin;BP:removal of superoxide radicals;BP:sucrose mediated signaling;BP:cell differentiation;BP:jasmonic acid mediated signaling pathway;BP:anthocyanin-containing compound biosynthetic process;BP:response to ethylene;BP:regulation of transcription, DNA-templated;BP:response to karrikin;BP:response to oomycetes;BP:positive regulation of anthocyanin biosynthetic process;BP:regulatio…	K09422	MYBP	------	------	COG5147	K:Transcription	NP_176813.1	myb domain protein 90 [Arabidopsis thaliana]	sp|Q9ZTC3|MYB90_ARATH;	Transcription factor MYB90 OS=Arabidopsis thaliana OX=3702 GN=MYB90 PE=1 SV=1;	PF00249.32;PF13921.7	Myb_DNA-binding;Myb_DNA-bind_6	Myb-like DNA-binding domain;Myb-like DNA-binding domain
AT2G45930		Expressed protein [Source:UniProtKB/TrEMBL;Acc:O80826]	12.585	3.65366	9.64937e-07	7.68266e-06	yes	up	0.12	0.08	0.08	1.38	1.31	1.6	0.0933333	1.43	------	------	------	------	------	------	ENOG41106AI;ENOG411081W	S:Function unknown;	NP_566057.1	hypothetical protein AT2G45930 [Arabidopsis thaliana]	------	------	------	------	------
AT4G15390		HSR201-like protein [Source:UniProtKB/TrEMBL;Acc:O23392]	12.473	3.64071	0.00148674	0.0057224	yes	up	0.07	0.06	0	0.24	1.5	0.44	0.0433333	0.726667	GO:0016740;GO:001674	MF:transferase activity;MF:transferase activity, transferring acyl groups other than amino-acyl groups;	------	------	------	------	ENOG41106M9	S:Function unknown	BAF02069.1	HSR201 like protein [Arabidopsis thaliana]	sp|Q9FI40|BAHD1_ARATH;	BAHD acyltransferase At5g47980 OS=Arabidopsis thaliana OX=3702 GN=BAHD1 PE=2 SV=1;	PF02458.16	Transferase	Transferase family
AT2G27690	CYP94C1	Cytochrome P450 94C1 [Source:UniProtKB/Swiss-Prot;Acc:Q9ZUX1]	12.409	3.63331	1.0071e-26	7.4087e-25	yes	up	1.4	0.64	0.85	8.3	14.06	21.67	0.963333	14.6767	GO:0009611;GO:0055114;GO:0043231;GO:0005783;GO:0016021;GO:0016020;GO:0005789;GO:0004497;GO:0016705;GO:0020037;GO:0018685;GO:0005506;GO:0046872;GO:001649	BP:response to wounding;BP:oxidation-reduction process;CC:intracellular membrane-bounded organelle;CC:endoplasmic reticulum;CC:integral component of membrane;CC:membrane;CC:endoplasmic reticulum membrane;MF:monooxygenase activity;MF:oxidoreductase activity, acting on paired donors, with incorporation or reduction of molecular oxygen;MF:heme binding;MF:alkane 1-monooxygenase activity;MF:iron ion b…	K20624	CYP94C1	------	------	COG2124	C:Energy production and conversion	NP_180337.1	cytochrome P450, family 94, subfamily C, polypeptide 1 [Arabidopsis thaliana]	sp|Q9ZUX1|C94C1_ARATH;	Cytochrome P450 94C1 OS=Arabidopsis thaliana OX=3702 GN=CYP94C1 PE=1 SV=1;	PF00067.23	p450	Cytochrome P450
AT5G26660	MYB86	Transcription factor MYB86 [Source:UniProtKB/Swiss-Prot;Acc:Q8LPH6]	12.168	3.60499	0.0134105	0.038389	yes	up	0.04	0.04	0	0.32	0.64	0.15	0.0266667	0.37	GO:0030154;GO:0010119;GO:0005634;GO:0043565;GO:0044212;GO:0003700;GO:0003677;GO:000097	BP:cell differentiation;BP:regulation of stomatal movement;CC:nucleus;MF:sequence-specific DNA binding;MF:transcription regulatory region DNA binding;MF:transcription factor activity, sequence-specific DNA binding;MF:DNA binding;MF:transcription regulatory region sequence-specific DNA binding;	K09422	MYBP	------	------	COG5147	S:Function unknown	NP_850879.1	myb domain protein 86 [Arabidopsis thaliana]	sp|Q8LPH6|MYB86_ARATH;	Transcription factor MYB86 OS=Arabidopsis thaliana OX=3702 GN=MYB86 PE=2 SV=1;	PF00249.32;PF13921.7	Myb_DNA-binding;Myb_DNA-bind_6	Myb-like DNA-binding domain;Myb-like DNA-binding domain
AT3G49570	LSU3	Protein RESPONSE TO LOW SULFUR 3 [Source:UniProtKB/Swiss-Prot;Acc:Q9SCK2]	12.166	3.60479	2.6606e-15	6.70015e-14	yes	up	0.67	0.92	0.39	8.21	11.02	10.11	0.66	9.78	GO:0098869;GO:000557	BP:cellular oxidant detoxification;CC:cellular_component;	------	------	------	------	ENOG410ZF0Z	S:Function unknown	NP_190526.1	response to low sulfur 3 [Arabidopsis thaliana]	sp|Q9SCK2|LSU3_ARATH;	Protein RESPONSE TO LOW SULFUR 3 OS=Arabidopsis thaliana OX=3702 GN=LSU3 PE=4 SV=1;	------	------	------
AT2G23270		At2g23270 [Source:UniProtKB/TrEMBL;Acc:O22181]	12.099	3.59678	0.000114007	0.000582952	yes	up	0.37	0.12	0.03	2.1	4.33	1.93	0.173333	2.78667	GO:0009814;GO:0098542;GO:0071456;GO:001602	BP:defense response, incompatible interaction;BP:defense response to other organism;BP:cellular response to hypoxia;CC:integral component of membrane;	------	------	------	------	ENOG4111317	S:Function unknown	NP_565549.1	transmembrane protein [Arabidopsis thaliana]	sp|F4JRC5|PIP2_ARATH;	PAMP-induced secreted peptide 2 OS=Arabidopsis thaliana OX=3702 GN=PIP2 PE=1 SV=1;	------	------	------
AT1G01600	CYP86A4	Cytochrome P450 86A4 [Source:UniProtKB/Swiss-Prot;Acc:Q9LMM1]	11.784	3.55882	1.29095e-06	1.00547e-05	yes	up	0.05	0.07	0.07	1.14	0.93	0.57	0.0633333	0.88	GO:0006631;GO:0055114;GO:0016021;GO:0016020;GO:0004497;GO:0016705;GO:0020037;GO:0070330;GO:0018685;GO:0005506;GO:0046872;GO:001649	BP:fatty acid metabolic process;BP:oxidation-reduction process;CC:integral component of membrane;CC:membrane;MF:monooxygenase activity;MF:oxidoreductase activity, acting on paired donors, with incorporation or reduction of molecular oxygen;MF:heme binding;MF:aromatase activity;MF:alkane 1-monooxygenase activity;MF:iron ion binding;MF:metal ion binding;MF:oxidoreductase activity;	K15398	CYP86A4S	map00073	Cutin, suberine and wax biosynthesis	COG2124	U:Intracellular trafficking, secretion, and vesicular transport	NP_171666.1	cytochrome P450, family 86, subfamily A, polypeptide 4 [Arabidopsis thaliana]	sp|Q9LMM1|C86A4_ARATH;	Cytochrome P450 86A4 OS=Arabidopsis thaliana OX=3702 GN=CYP86A4 PE=1 SV=1;	PF00067.23	p450	Cytochrome P450
AT3G48450		At3g48450 [Source:UniProtKB/TrEMBL;Acc:Q8LCF4]	11.621	3.53863	0.00202211	0.00747108	yes	up	0	0.19	0.15	0.73	3.49	0.87	0.113333	1.69667	GO:0002758;GO:000588	BP:innate immune response-activating signal transduction;CC:plasma membrane;	------	------	------	------	ENOG4111597	S:Function unknown	NP_001325747.1	RPM1-interacting protein 4 (RIN4) family protein [Arabidopsis thaliana]	sp|O22633|NOI4_ARATH;	Protein NOI4 OS=Arabidopsis thaliana OX=3702 GN=NOI4 PE=1 SV=1;	PF05627.12	AvrRpt-cleavage	Cleavage site for pathogenic type III effector avirulence factor Avr
AT3G06020	FAF4	Protein FANTASTIC FOUR 4 [Source:UniProtKB/Swiss-Prot;Acc:Q9SFG6]	11.593	3.53519	5.77921e-12	9.93941e-11	yes	up	0.55	0.29	0.1	3.47	5.33	4.45	0.313333	4.41667	GO:001007	BP:regulation of meristem growth;	------	------	------	------	ENOG411077P;ENOG41114KZ	S:Function unknown;	NP_187253.1	FANTASTIC four-like protein (DUF3049) [Arabidopsis thaliana]	sp|Q9SFG6|FAF4_ARATH;	Protein FANTASTIC FOUR 4 OS=Arabidopsis thaliana OX=3702 GN=FAF4 PE=2 SV=1;	PF11250.9	FAF	Fantastic Four meristem regulator
AT1G65860	FMOGS-OX1	Flavin-containing monooxygenase FMO GS-OX1 [Source:UniProtKB/Swiss-Prot;Acc:Q9SS04]	11.568	3.53206	5.59945e-17	1.6989e-15	yes	up	0.99	0.55	0.16	5.55	11.03	7.5	0.566667	8.02667	GO:0019761;GO:0033506;GO:0055114;GO:0080105;GO:0080106;GO:0004497;GO:0050660;GO:0080103;GO:0080102;GO:0004499;GO:0050661;GO:0080104;GO:0080107;GO:001649	BP:glucosinolate biosynthetic process;BP:glucosinolate biosynthetic process from homomethionine;BP:oxidation-reduction process;MF:6-methylthiopropyl glucosinolate S-oxygenase activity;MF:7-methylthiopropyl glucosinolate S-oxygenase activity;MF:monooxygenase activity;MF:flavin adenine dinucleotide binding;MF:4-methylthiopropyl glucosinolate S-oxygenase activity;MF:3-methylthiopropyl glucosinolate …	K22324	GS-OX	------	------	COG2072	P:Inorganic ion transport and metabolism	NP_176761.1	flavin-monooxygenase glucosinolate S-oxygenase 1 [Arabidopsis thaliana]	sp|Q9SS04|GSOX1_ARATH;	Flavin-containing monooxygenase FMO GS-OX1 OS=Arabidopsis thaliana OX=3702 GN=FMOGS-OX1 PE=1 SV=1;	PF00743.20;PF13738.7;PF07992.15;PF01266.25;PF13450.7;PF13454.7;PF13434.7;PF00890.25;PF03486.15;PF00070.28;PF01494.20;PF12831.8;PF01593.25	FMO-like;Pyr_redox_3;Pyr_redox_2;DAO;NAD_binding_8;NAD_binding_9;K_oxygenase;FAD_binding_2;HI0933_like;Pyr_redox;FAD_binding_3;FAD_oxidored;Amino_oxidase	Flavin-binding monooxygenase-like;Pyridine nucleotide-disulphide oxidoreductase;Pyridine nucleotide-disulphide oxidoreductase;FAD dependent oxidoreductase;NA;FAD-NA;L-lysine 6-monooxygenase;FAD binding domain;HI0933-like protein;Pyridine nucleotide-disulphide oxidoreductase;FAD binding domain;FAD dependent oxidoreductase;Flavin containing amine oxidoreductase
AT1G35310	MLP168	MLP-like protein 168 [Source:UniProtKB/Swiss-Prot;Acc:Q9C7I3]	11.471	3.51993	0.0156191	0.0436014	yes	up	0.08	0.08	0	1.01	0.92	0.32	0.0533333	0.75	GO:000695	BP:defense response;	------	------	------	------	ENOG41104BF	S:Function unknown	NP_174764.1	MLP-like protein 168 [Arabidopsis thaliana]	sp|Q9C7I3|ML168_ARATH;	MLP-like protein 168 OS=Arabidopsis thaliana OX=3702 GN=MLP168 PE=2 SV=1;	PF00407.20;PF10604.10	Bet_v_1;Polyketide_cyc2	Pathogenesis-related protein Bet v 1 family;Polyketide cyclase / dehydrase and lipid transport
AT3G58990	IPMI1	3-isopropylmalate dehydratase small subunit 2 [Source:UniProtKB/Swiss-Prot;Acc:Q9LYT7]	11.439	3.51595	8.88266e-63	4.89253e-60	yes	up	4.21	3.42	4.75	41.22	69.51	62.43	4.12667	57.72	GO:0008652;GO:0019761;GO:0048229;GO:0009658;GO:0009098;GO:0009082;GO:0009536;GO:0009570;GO:0009507;GO:0016829;GO:0003861;GO:001683	BP:cellular amino acid biosynthetic process;BP:glucosinolate biosynthetic process;BP:gametophyte development;BP:chloroplast organization;BP:leucine biosynthetic process;BP:branched-chain amino acid biosynthetic process;CC:plastid;CC:chloroplast stroma;CC:chloroplast;MF:lyase activity;MF:3-isopropylmalate dehydratase activity;MF:hydro-lyase activity;	K21359	MAM-IS, IPMI2	map00966;map00290	Glucosinolate biosynthesis;Valine, leucine and isoleucine biosynthesis	COG0066	E:Amino acid transport and metabolism	NP_191458.1	isopropylmalate isomerase 1 [Arabidopsis thaliana]	sp|Q9LYT7|LEUD2_ARATH;	3-isopropylmalate dehydratase small subunit 3 OS=Arabidopsis thaliana OX=3702 GN=SSU3 PE=1 SV=1;	PF00694.20	Aconitase_C	Aconitase C-terminal domain
AT1G50590		Pirin-like protein At1g50590 [Source:UniProtKB/Swiss-Prot;Acc:Q9LPS9]	11.225	3.48869	4.96731e-07	4.16157e-06	yes	up	0.15	0.3	0.1	2.89	2.74	2.3	0.183333	2.64333	GO:0008150;GO:000563	BP:biological_process;CC:nucleus;	K06911	PIR	------	------	COG1741	S:Function unknown	NP_175474.1	RmlC-like cupins superfamily protein [Arabidopsis thaliana]	sp|Q9LPS9|PRNL1_ARATH;	Pirin-like protein At1g50590 OS=Arabidopsis thaliana OX=3702 GN=At1g50590 PE=2 SV=1;	PF05726.14;PF02678.17	Pirin_C;Pirin	Pirin C-terminal cupin domain;Pirin
AT3G16410	NSP4	Nitrile-specifier protein 4 [Source:UniProtKB/Swiss-Prot;Acc:O04316]	10.965	3.45482	0.00100907	0.00406219	yes	up	0	0.11	0.05	0.56	0.57	0.48	0.0533333	0.536667	GO:0050790;GO:0080027;GO:0080028;GO:0019762;GO:0005829;GO:0005634;GO:0009507;GO:0009506;GO:0030246;GO:0005515;GO:0030234;GO:000372	BP:regulation of catalytic activity;BP:response to herbivore;BP:nitrile biosynthetic process;BP:glucosinolate catabolic process;CC:cytosol;CC:nucleus;CC:chloroplast;CC:plasmodesma;MF:carbohydrate binding;MF:protein binding;MF:enzyme regulator activity;MF:mRNA binding;	------	------	------	------	ENOG410Y2DF	K:Transcription	NP_188262.1	nitrile specifier protein 4 [Arabidopsis thaliana]	sp|O04316|JAL29_ARATH;	Nitrile-specifier protein 4 OS=Arabidopsis thaliana OX=3702 GN=NSP4 PE=2 SV=1;	PF01419.18;PF01344.26;PF13418.7;PF13964.7;PF13415.7;PF13854.7	Jacalin;Kelch_1;Kelch_4;Kelch_6;Kelch_3;Kelch_5	Jacalin-like lectin domain;Kelch motif;Galactose oxidase, central domain;Kelch motif;Galactose oxidase, central domain;Kelch motif
AT4G30170	PER45	Peroxidase 45 [Source:UniProtKB/Swiss-Prot;Acc:Q96522]	10.912	3.44787	0.00847685	0.0258616	yes	up	0.1	0	0.05	0.28	1.35	0.29	0.05	0.64	GO:0006979;GO:0098869;GO:0042744;GO:0055114;GO:0005773;GO:0005576;GO:0020037;GO:0046872;GO:0004601;GO:001649	BP:response to oxidative stress;BP:cellular oxidant detoxification;BP:hydrogen peroxide catabolic process;BP:oxidation-reduction process;CC:vacuole;CC:extracellular region;MF:heme binding;MF:metal ion binding;MF:peroxidase activity;MF:oxidoreductase activity;	K00430	E1.11.1.7	map00940	Phenylpropanoid biosynthesis	ENOG4111S7R	S:Function unknown	NP_194746.1	Peroxidase family protein [Arabidopsis thaliana]	sp|Q96522|PER45_ARATH;	Peroxidase 45 OS=Arabidopsis thaliana OX=3702 GN=PER45 PE=1 SV=1;	PF00141.24	peroxidase	Peroxidase
AT4G38340	NLP3	Protein NLP3 [Source:UniProtKB/Swiss-Prot;Acc:Q9SVF1]	10.81	3.43435	5.20044e-06	3.57474e-05	yes	up	0.02	0.1	0.04	0.56	0.89	0.75	0.0533333	0.733333	GO:0006355;GO:0005634;GO:0003700;GO:0005515;GO:000367	BP:regulation of transcription, DNA-templated;CC:nucleus;MF:transcription factor activity, sequence-specific DNA binding;MF:protein binding;MF:DNA binding;	------	------	------	------	ENOG4110HDW	S:Function unknown	NP_195547.1	Plant regulator RWP-RK family protein [Arabidopsis thaliana]	sp|Q9SVF1|NLP3_ARATH;	Protein NLP3 OS=Arabidopsis thaliana OX=3702 GN=NLP3 PE=2 SV=1;	PF02042.16;PF00564.25;PF13185.7	RWP-RK;PB1;GAF_2	RWP-RK domain;PB1 domain;GAF domain
AT1G67750		Probable pectate lyase 5 [Source:UniProtKB/Swiss-Prot;Acc:Q9FXD8]	10.648	3.41247	2.41362e-23	1.38628e-21	yes	up	0.46	0.44	0.28	5.72	4.91	4.76	0.393333	5.13	GO:0045490;GO:0005739;GO:0030570;GO:0016829;GO:004687	BP:pectin catabolic process;CC:mitochondrion;MF:pectate lyase activity;MF:lyase activity;MF:metal ion binding;	K01728	pel	map00040	Pentose and glucuronate interconversions	COG3866	I:Lipid transport and metabolism	NP_564906.1	Pectate lyase family protein [Arabidopsis thaliana]	sp|Q9FXD8|PLY5_ARATH;	Probable pectate lyase 5 OS=Arabidopsis thaliana OX=3702 GN=At1g67750 PE=2 SV=2;	PF00544.20;PF13229.7	Pectate_lyase_4;Beta_helix	Pectate lyase;Right handed beta helix region
AT1G16410	CYP79F1	Dihomomethionine N-hydroxylase [Source:UniProtKB/Swiss-Prot;Acc:Q949U1]	10.624	3.40919	1.14769e-55	4.04155e-53	yes	up	3.05	2.15	1.65	24.73	37.85	25.57	2.28333	29.3833	GO:0019761;GO:0009625;GO:0055114;GO:0005783;GO:0005634;GO:0016020;GO:0005789;GO:0016021;GO:0004497;GO:0016705;GO:0020037;GO:0016709;GO:0103096;GO:0103097;GO:0005506;GO:0046872;GO:001649	BP:glucosinolate biosynthetic process;BP:response to insect;BP:oxidation-reduction process;CC:endoplasmic reticulum;CC:nucleus;CC:membrane;CC:endoplasmic reticulum membrane;CC:integral component of membrane;MF:monooxygenase activity;MF:oxidoreductase activity, acting on paired donors, with incorporation or reduction of molecular oxygen;MF:heme binding;MF:oxidoreductase activity, acting on paired …	K12154	CYP79F1	map00966	Glucosinolate biosynthesis	COG2124	Q:Secondary metabolites biosynthesis, transport and catabolism	NP_563996.2	cytochrome p450 79f1 [Arabidopsis thaliana]	sp|Q949U1|C79F1_ARATH;	Dihomomethionine N-hydroxylase OS=Arabidopsis thaliana OX=3702 GN=CYP79F1 PE=1 SV=1;	PF00067.23	p450	Cytochrome P450
AT1G31690		Amine oxidase [Source:UniProtKB/TrEMBL;Acc:F4IAX0]	10.559	3.40036	1.09902e-11	1.83292e-10	yes	up	0.27	0.06	0.12	2.21	1.71	1.9	0.15	1.94	GO:0009308;GO:0055114;GO:0005634;GO:0016021;GO:0052593;GO:0005507;GO:0052595;GO:0052594;GO:0008131;GO:0052596;GO:0048038;GO:0046872;GO:001649	BP:amine metabolic process;BP:oxidation-reduction process;CC:nucleus;CC:integral component of membrane;MF:tryptamin;MF:copper ion binding;MF:aliphatic-amine oxidase activity;MF:aminoaceton;MF:primary amine oxidase activity;MF:phenethylamin;MF:quinone binding;MF:metal ion binding;MF:oxidoreductase activity;	K00276	AOC3, AOC2, tynA	map00260;map00960;map00950;map00360;map00350;map00410	Glycine, serine and threonine metabolism;Tropane, piperidine and pyridine alkaloid biosynthesis;Isoquinoline alkaloid biosynthesis;Phenylalanine metabolism;Tyrosine metabolism;beta-Alanine metabolism	COG3733	Q:Secondary metabolites biosynthesis, transport and catabolism	NP_174450.2	Copper amine oxidase family protein [Arabidopsis thaliana]	sp|P0DO00|AMO2_ARATH;	Primary amine oxidase 2 OS=Arabidopsis thaliana OX=3702 GN=At1g31672 PE=3 SV=1;	PF01179.21;PF02728.17;PF02727.17	Cu_amine_oxid;Cu_amine_oxidN3;Cu_amine_oxidN2	Copper amine oxidase, enzyme domain;Copper amine oxidase, N3 domain;Copper amine oxidase, N2 domain
AT2G37430	ZAT11	ZAT11 [Source:UniProtKB/TrEMBL;Acc:A0A178VNJ8]	10.537	3.39735	0.00272382	0.00972313	yes	up	0.55	1.05	0.49	1.77	22.73	2.75	0.696667	9.08333	GO:0010200;GO:0071289;GO:2000280;GO:0006355;GO:0005634;GO:0044212;GO:0003700;GO:0000976;GO:0003676;GO:004687	BP:response to chitin;BP:cellular response to nickel ion;BP:regulation of root development;BP:regulation of transcription, DNA-templated;CC:nucleus;MF:transcription regulatory region DNA binding;MF:transcription factor activity, sequence-specific DNA binding;MF:transcription regulatory region sequence-specific DNA binding;MF:nucleic acid binding;MF:metal ion binding;	------	------	------	------	COG5048	S:Function unknown	NP_181279.1	C2H2 and C2HC zinc fingers superfamily protein [Arabidopsis thaliana]	sp|Q9SLD4|ZAT11_ARATH;	Zinc finger protein ZAT11 OS=Arabidopsis thaliana OX=3702 GN=ZAT11 PE=2 SV=1;	PF13912.7;PF13894.7;PF12756.8;PF12171.9	zf-C2H2_6;zf-C2H2_4;zf-C2H2_2;zf-C2H2_jaz	C2H2-type zinc finger;C2H2-type zinc finger;C2H2 type zinc-finger;Zinc-finger double-stranded RNA-binding
AT5G45340	CYP707A3	Abscisic acid 8'-hydroxylase 3 [Source:UniProtKB/Swiss-Prot;Acc:Q9FH76]	10.38	3.3757	1.43489e-40	2.37099e-38	yes	up	0.89	0.94	1.5	12.33	12.38	17.82	1.11	14.1767	GO:0009639;GO:0009687;GO:0046345;GO:0016125;GO:0009414;GO:0071456;GO:0055114;GO:0016020;GO:0016021;GO:0004497;GO:0020037;GO:0016709;GO:0016705;GO:0010295;GO:0005506;GO:0046872;GO:001649	BP:response to red or far red light;BP:abscisic acid metabolic process;BP:abscisic acid catabolic process;BP:sterol metabolic process;BP:response to water deprivation;BP:cellular response to hypoxia;BP:oxidation-reduction process;CC:membrane;CC:integral component of membrane;MF:monooxygenase activity;MF:heme binding;MF:oxidoreductase activity, acting on paired donors, with incorporation or reduct…	K09843	CYP707A	map00906	Carotenoid biosynthesis	COG2124	S:Function unknown	NP_851136.1	cytochrome P450, family 707, subfamily A, polypeptide 3 [Arabidopsis thaliana]	sp|Q9FH76|ABAH3_ARATH;	Abscisic acid 8'-hydroxylase 3 OS=Arabidopsis thaliana OX=3702 GN=CYP707A3 PE=1 SV=1;	PF00067.23	p450	Cytochrome P450
AT1G66700	PXMT1	Paraxanthine methyltransferase 1 [Source:UniProtKB/Swiss-Prot;Acc:Q9C9M3]	10.346	3.37102	1.57398e-17	5.09965e-16	yes	up	0.42	0.6	0.51	4.22	7.83	7.36	0.51	6.47	GO:0010029;GO:0032259;GO:0009751;GO:0080027;GO:0009617;GO:2000280;GO:0009416;GO:0042742;GO:0035195;GO:0002238;GO:0007275;GO:1900140;GO:0008757;GO:0046872;GO:0016740;GO:000816	BP:regulation of seed germination;BP:methylation;BP:response to salicylic acid;BP:response to herbivore;BP:response to bacterium;BP:regulation of root development;BP:response to light stimulus;BP:defense response to bacterium;BP:gene silencing by miRNA;BP:response to molecule of fungal origin;BP:multicellular organism development;BP:regulation of seedling development;MF:S-adenosylmethionine-depen…	------	------	------	------	ENOG41106YX	S:Function unknown	NP_564881.3	S-adenosyl-L-methionine-dependent methyltransferases superfamily protein [Arabidopsis thaliana]	sp|Q9C9M3|PXMT1_ARATH;	Paraxanthine methyltransferase 1 OS=Arabidopsis thaliana OX=3702 GN=PXMT1 PE=2 SV=1;	PF03492.16	Methyltransf_7	SAM dependent carboxyl methyltransferase
AT3G48850	MPT2	Mitochondrial phosphate carrier protein 2, mitochondrial [Source:UniProtKB/Swiss-Prot;Acc:Q9M2Z8]	10.269	3.36016	1.51949e-05	9.49118e-05	yes	up	0.04	0.11	0.2	0.92	2.44	1.03	0.116667	1.46333	GO:0009651;GO:0035435;GO:0016021;GO:0016020;GO:0005739;GO:0031305;GO:0005743;GO:0005315;GO:000372	BP:response to salt stress;BP:phosphate ion transmembrane transport;CC:integral component of membrane;CC:membrane;CC:mitochondrion;CC:integral component of mitochondrial inner membrane;CC:mitochondrial inner membrane;MF:inorganic phosphate transmembrane transporter activity;MF:mRNA binding;	K15102	SLC25A3, PHC, PIC	------	------	ENOG410XPST	S:Function unknown	NP_190454.1;	;[Arabidopsis thaliana]	sp|Q9M2Z8|MPCP2_ARATH;	Mitochondrial phosphate carrier protein 2, mitochondrial OS=Arabidopsis thaliana OX=3702 GN=MPT2 PE=2 SV=1;	PF00153.28	Mito_carr	Mitochondrial carrier protein
AT5G39110		Germin-like protein subfamily 1 member 14 [Source:UniProtKB/Swiss-Prot;Acc:Q9FID0]	10.245	3.35679	0.000244395	0.00115103	yes	up	0.25	0	0.27	1.18	2.05	2.84	0.173333	2.02333	GO:0005618;GO:0048046;GO:0005576;GO:0030145;GO:0045735;GO:004687	CC:cell wall;CC:apoplast;CC:extracellular region;MF:manganese ion binding;MF:nutrient reservoir activity;MF:metal ion binding;	------	------	------	------	ENOG410YERY	S:Function unknown	NP_198727.1	RmlC-like cupins superfamily protein [Arabidopsis thaliana]	sp|Q9FID0|GL114_ARATH;	Germin-like protein subfamily 1 member 14 OS=Arabidopsis thaliana OX=3702 GN=At5g39110 PE=3 SV=1;	PF00190.23;PF07883.12	Cupin_1;Cupin_2	Cupin;Cupin domain
AT5G42840		CHP-rich zinc finger protein-like [Source:UniProtKB/TrEMBL;Acc:Q9FMN5]	10.155	3.34416	0.00940863	0.0282349	yes	up	0	0.04	0.03	0.1	0.44	0.33	0.0233333	0.29	GO:0035556;GO:004687	BP:intracellular signal transduction;MF:metal ion binding;	------	------	------	------	------	------	NP_199098.1	Cysteine/Histidine-rich C1 domain family protein [Arabidopsis thaliana]	------	------	PF03107.17	C1_2	C1 domain
AT4G29700		Alkaline-phosphatase-like family protein [Source:UniProtKB/TrEMBL;Acc:Q9SU81]	10.006	3.32281	2.01043e-50	5.1412e-48	yes	up	0.86	1.29	1.25	12.91	12.59	16.63	1.13333	14.0433	GO:0005773;GO:0016021;GO:0016020;GO:0016787;GO:0003824;GO:0004551;GO:0005515;GO:0047429;GO:0036218;GO:003552	CC:vacuole;CC:integral component of membrane;CC:membrane;MF:hydrolase activity;MF:catalytic activity;MF:nucleotide diphosphatase activity;MF:protein binding;MF:nucleoside-triphosphate diphosphatase activity;MF:dTTP diphosphatase activity;MF:NADH pyrophosphatase activity;	------	------	------	------	COG1524	O:Posttranslational modification, protein turnover, chaperones	NP_194699.1	Alkaline-phosphatase-like family protein [Arabidopsis thaliana]	sp|O14638|ENPP3_HUMAN;	Ectonucleotide pyrophosphatase/phosphodiesterase family member 3 OS=Homo sapiens OX=9606 GN=ENPP3 PE=1 SV=2;	PF01663.23;PF00884.24;PF01676.19	Phosphodiest;Sulfatase;Metalloenzyme	Type I phosphodiesterase / nucleotide pyrophosphatase;Sulfatase;Metalloenzyme superfamily
AT5G07700	MYB76	MYB76 [Source:UniProtKB/TrEMBL;Acc:A0A178UB51]	9.983	3.31948	0.00218031	0.00796248	yes	up	0	0.04	0.12	0.65	0.98	0.55	0.0533333	0.726667	GO:0030154;GO:0009625;GO:0009611;GO:0006355;GO:0010439;GO:0009414;GO:0005634;GO:0043565;GO:0044212;GO:0003700;GO:0000976;GO:000367	BP:cell differentiation;BP:response to insect;BP:response to wounding;BP:regulation of transcription, DNA-templated;BP:regulation of glucosinolate biosynthetic process;BP:response to water deprivation;CC:nucleus;MF:sequence-specific DNA binding;MF:transcription regulatory region DNA binding;MF:transcription factor activity, sequence-specific DNA binding;MF:transcription regulatory region sequence…	K09422	MYBP	------	------	COG5147	K:Transcription	NP_001318501.1	myb domain protein 76 [Arabidopsis thaliana]	sp|Q9SPG5|MYB76_ARATH;	Transcription factor MYB76 OS=Arabidopsis thaliana OX=3702 GN=MYB76 PE=1 SV=1;	PF00249.32;PF13921.7	Myb_DNA-binding;Myb_DNA-bind_6	Myb-like DNA-binding domain;Myb-like DNA-binding domain
AT1G68238		Putative uncharacterized protein [Source:UniProtKB/TrEMBL;Acc:Q1G3X3]	9.896	3.30688	1.75681e-14	4.01896e-13	yes	up	3.24	1.8	1.39	31.79	22.32	20.17	2.14333	24.76	GO:0008150;GO:0016021;GO:0016020;GO:000367	BP:biological_process;CC:integral component of membrane;CC:membrane;MF:molecular_function;	------	------	------	------	------	------	NP_001117569.1	transmembrane protein [Arabidopsis thaliana]	------	------	------	------	------
AT1G13430	STO9	Cytosolic sulfotransferase 9 [Source:UniProtKB/Swiss-Prot;Acc:Q9FX55]	9.829	3.29701	1.06186e-07	9.87863e-07	yes	up	0.46	0.13	0.42	4.17	1.4	6.45	0.336667	4.00667	GO:0016131;GO:0009735;GO:0051923;GO:0005737;GO:0080118;GO:0008146;GO:001674	BP:brassinosteroid metabolic process;BP:response to cytokinin;BP:sulfation;CC:cytoplasm;MF:brassinosteroid sulfotransferase activity;MF:sulfotransferase activity;MF:transferase activity;	------	------	------	------	ENOG4111H56	S:Function unknown	NP_172800.2	sulfotransferase 4C [Arabidopsis thaliana]	sp|Q9FX55|SOT9_ARATH;	Cytosolic sulfotransferase 9 OS=Arabidopsis thaliana OX=3702 GN=STO9 PE=2 SV=1;	PF00685.28;PF13469.7	Sulfotransfer_1;Sulfotransfer_3	Sulfotransferase domain;Sulfotransferase family
AT5G22460		Alpha/beta-Hydrolases superfamily protein [Source:UniProtKB/TrEMBL;Acc:Q9FMQ5]	9.774	3.28889	4.07129e-06	2.85989e-05	yes	up	0.25	0.23	0	2	1.37	2.33	0.16	1.9	GO:0005618;GO:0005773;GO:0009505;GO:0009506;GO:001678	CC:cell wall;CC:vacuole;CC:plant-type cell wall;CC:plasmodesma;MF:hydrolase activity;	------	------	------	------	ENOG4111K8Y	S:Function unknown	NP_001332031.1	alpha/beta-Hydrolases superfamily protein [Arabidopsis thaliana]	------	------	PF12146.9;PF12697.8;PF00561.21	Hydrolase_4;Abhydrolase_6;Abhydrolase_1	Serine aminopeptidase, S33;Alpha/beta hydrolase family;alpha/beta hydrolase fold
AT1G62560	FMOGS-OX3	Flavin-containing monooxygenase FMO GS-OX3 [Source:UniProtKB/Swiss-Prot;Acc:Q9SXE1]	9.531	3.25264	1.95523e-29	1.70041e-27	yes	up	1.06	1.09	0.53	8.81	13.24	9.16	0.893333	10.4033	GO:0019761;GO:0055114;GO:0016021;GO:0016020;GO:0080105;GO:0080106;GO:0004497;GO:0050660;GO:0080103;GO:0080102;GO:0004499;GO:0050661;GO:0080104;GO:0080107;GO:001649	BP:glucosinolate biosynthetic process;BP:oxidation-reduction process;CC:integral component of membrane;CC:membrane;MF:6-methylthiopropyl glucosinolate S-oxygenase activity;MF:7-methylthiopropyl glucosinolate S-oxygenase activity;MF:monooxygenase activity;MF:flavin adenine dinucleotide binding;MF:4-methylthiopropyl glucosinolate S-oxygenase activity;MF:3-methylthiopropyl glucosinolate S-oxygenase …	K22324	GS-OX	------	------	COG2072	P:Inorganic ion transport and metabolism	NP_176444.1	flavin-monooxygenase glucosinolate S-oxygenase 3 [Arabidopsis thaliana]	sp|Q9SXE1|GSOX3_ARATH;	Flavin-containing monooxygenase FMO GS-OX3 OS=Arabidopsis thaliana OX=3702 GN=FMOGS-OX3 PE=1 SV=1;	PF00743.20;PF13738.7;PF07992.15;PF01266.25;PF13454.7;PF13450.7;PF13434.7;PF01593.25;PF03486.15;PF01494.20;PF12831.8;PF00890.25;PF01946.18	FMO-like;Pyr_redox_3;Pyr_redox_2;DAO;NAD_binding_9;NAD_binding_8;K_oxygenase;Amino_oxidase;HI0933_like;FAD_binding_3;FAD_oxidored;FAD_binding_2;Thi4	Flavin-binding monooxygenase-like;Pyridine nucleotide-disulphide oxidoreductase;Pyridine nucleotide-disulphide oxidoreductase;FAD dependent oxidoreductase;FAD-NA;NA;L-lysine 6-monooxygenase;Flavin containing amine oxidoreductase;HI0933-like protein;FAD binding domain;FAD dependent oxidoreductase;FAD binding domain;Thi4 family
AT5G37490	PUB21	U-box domain-containing protein 21 [Source:UniProtKB/Swiss-Prot;Acc:Q5PNY6]	9.465	3.24267	0.00186992	0.00697599	yes	up	0.06	0.12	0	0.37	1.52	0.33	0.06	0.74	GO:0016567;GO:0010200;GO:0016740;GO:000484	BP:protein ubiquitination;BP:response to chitin;MF:transferase activity;MF:ubiquitin-protein transferase activity;	------	------	------	------	ENOG410Y3P9	S:Function unknown	NP_198565.1	ARM repeat superfamily protein [Arabidopsis thaliana]	sp|Q5PNY6|PUB21_ARATH;	U-box domain-containing protein 21 OS=Arabidopsis thaliana OX=3702 GN=PUB21 PE=2 SV=1;	PF04564.16;PF11789.9	U-box;zf-Nse	U-box domain;Zinc-finger of the MIZ type in Nse subunit
AT1G71200		basic helix-loop-helix (bHLH) DNA-binding superfamily protein [Source:TAIR;Acc:AT1G71200]	9.423	3.23617	0.00264992	0.00948875	yes	up	0.07	0.03	0.03	0.3	0.52	0.6	0.0433333	0.473333	GO:0071280;GO:0006355;GO:0006357;GO:0005634;GO:0090575;GO:0003700;GO:0000977;GO:0003677;GO:0046983;GO:000813	BP:cellular response to copper ion;BP:regulation of transcription, DNA-templated;BP:regulation of transcription from RNA polymerase II promoter;CC:nucleus;CC:RNA polymerase II transcription factor complex;MF:transcription factor activity, sequence-specific DNA binding;MF:RNA polymerase II regulatory region sequence-specific DNA binding;MF:DNA binding;MF:protein dimerization activity;MF:transcript…	------	------	------	------	ENOG4111A1M	K:Transcription	NP_001322926.1	basic helix-loop-helix (bHLH) DNA-binding superfamily protein [Arabidopsis thaliana]	sp|F4I8F9|BH160_ARATH;	Transcription factor bHLH160 OS=Arabidopsis thaliana OX=3702 GN=BHLH160 PE=3 SV=1;	PF00010.27	HLH	Helix-loop-helix DNA-binding domain
AT2G35859		Potential natural antisense gene, locus overlaps with AT2G35860 [Source:TAIR;Acc:AT2G35859]	9.4	3.23263	0.000860936	0.00352598	yes	up	0	0	0.25	1.05	1.25	0.61	0.0833333	0.97	GO:000557	CC:extracellular region;	------	------	------	------	COG2335	S:Function unknown	NP_850253.1	FASCICLIN-like arabinogalactan protein 16 precursor [Arabidopsis thaliana]	sp|Q8RWC5|FLA16_ARATH;	Fasciclin-like arabinogalactan protein 16 OS=Arabidopsis thaliana OX=3702 GN=FLA16 PE=2 SV=1;	------	------	------
AT1G20510	4CLL5	4-coumarate--CoA ligase-like 5 [Source:UniProtKB/Swiss-Prot;Acc:Q84P21]	9.37	3.22809	6.71941e-64	3.90107e-61	yes	up	6.55	5.85	7.45	51.78	96.25	80.77	6.61667	76.2667	GO:0009753;GO:0009617;GO:0009611;GO:0009695;GO:0016020;GO:0016021;GO:0005777;GO:0102391;GO:0003824;GO:0000166;GO:0016405;GO:0016874;GO:000552	BP:response to jasmonic acid;BP:response to bacterium;BP:response to wounding;BP:jasmonic acid biosynthetic process;CC:membrane;CC:integral component of membrane;CC:peroxisome;MF:decanoate--CoA ligase activity;MF:catalytic activity;MF:nucleotide binding;MF:CoA-ligase activity;MF:ligase activity;MF:ATP binding;	K10526	OPCL1	map00592	alpha-Linolenic acid metabolism	COG0318;COG0318	I:Lipid transport and metabolism;Q:Secondary metabolites biosynthesis, transport and catabolism	NP_564115.1	OPC-8:0 CoA ligase1 [Arabidopsis thaliana]	sp|Q84P21|4CLL5_ARATH;	4-coumarate--CoA ligase-like 5 OS=Arabidopsis thaliana OX=3702 GN=4CLL5 PE=1 SV=2;	PF00501.29;PF13193.7	AMP-binding;AMP-binding_C	AMP-binding enzyme;AMP-binding enzyme C-terminal domain
AT5G54720		Ankyrin repeat family protein [Source:UniProtKB/TrEMBL;Acc:Q9FH33]	9.356	3.22596	4.77619e-17	1.4615e-15	yes	up	1.73	0.28	1.21	9.69	12.19	14.67	1.07333	12.1833	GO:0016021;GO:0016020;GO:000551	CC:integral component of membrane;CC:membrane;MF:protein binding;	------	------	------	------	COG0666	S:Function unknown	NP_200283.1	Ankyrin repeat family protein [Arabidopsis thaliana]	------	------	PF13637.7;PF13857.7;PF12796.8;PF00023.31	Ank_4;Ank_5;Ank_2;Ank	Ankyrin repeats;Ankyrin repeats;Ankyrin repeats;Ankyrin repeat
AT4G39250	RL1	RSM2 [Source:UniProtKB/TrEMBL;Acc:A0A178UXD0]	9.337	3.22301	0.000253007	0.00118587	yes	up	0.32	0	0.25	3.09	2.1	1.21	0.19	2.13333	GO:0006355;GO:0005634;GO:0003700;GO:000367	BP:regulation of transcription, DNA-templated;CC:nucleus;MF:transcription factor activity, sequence-specific DNA binding;MF:DNA binding;	------	------	------	------	COG5269	S:Function unknown	NP_195636.2	RAD-like 1 [Arabidopsis thaliana]	sp|F4JVB8|RADL1_ARATH;	Protein RADIALIS-like 1 OS=Arabidopsis thaliana OX=3702 GN=RL1 PE=2 SV=1;	PF00249.32	Myb_DNA-binding	Myb-like DNA-binding domain
AT4G26950		At4g26950 [Source:UniProtKB/TrEMBL;Acc:Q9SZ34]	9.325	3.22109	8.9584e-06	5.87051e-05	yes	up	0.19	0.06	0.33	2.55	1.92	1.94	0.193333	2.13667	GO:0008150;GO:0009506;GO:000367	BP:biological_process;CC:plasmodesma;MF:molecular_function;	------	------	------	------	ENOG4111C6T;ENOG410YVRG	S:Function unknown;	NP_001190851.1	senescence regulator (Protein of unknown function, DUF584) [Arabidopsis thaliana]	------	------	PF04520.14	Senescence_reg	Senescence regulator
AT1G28480	GRXC9	Glutaredoxin-C9 [Source:UniProtKB/Swiss-Prot;Acc:Q9SGP6]	9.287	3.2152	2.76435e-06	2.01155e-05	yes	up	0.51	0.4	0.76	2.81	14.66	4	0.556667	7.15667	GO:0009751;GO:0000122;GO:0009863;GO:0009867;GO:0045454;GO:0005737;GO:0005634;GO:0005623;GO:0005515;GO:0015035;GO:000905	BP:response to salicylic acid;BP:negative regulation of transcription from RNA polymerase II promoter;BP:salicylic acid mediated signaling pathway;BP:jasmonic acid mediated signaling pathway;BP:cell redox homeostasis;CC:cytoplasm;CC:nucleus;CC:cell;MF:protein binding;MF:protein disulfide oxidoreductase activity;MF:electron carrier activity;	------	------	------	------	COG0695	K:Transcription	NP_174170.1	Thioredoxin superfamily protein [Arabidopsis thaliana]	sp|Q9SGP6|GRXC9_ARATH;	Glutaredoxin-C9 OS=Arabidopsis thaliana OX=3702 GN=GRXC9 PE=1 SV=1;	PF00462.25	Glutaredoxin	Glutaredoxin
AT4G04610	APR1	5'-adenylylsulfate reductase 1, chloroplastic [Source:UniProtKB/Swiss-Prot;Acc:P92979]	9.215	3.20398	2.69285e-106	9.64085e-103	yes	up	7.42	6.29	7.22	66.38	95.31	75.82	6.97667	79.17	GO:0008652;GO:0019419;GO:0019344;GO:0045454;GO:0000103;GO:0055114;GO:0009536;GO:0009570;GO:0005623;GO:0009507;GO:0051539;GO:0046872;GO:0051536;GO:0033741;GO:0009973;GO:0003824;GO:0016671;GO:001649	BP:cellular amino acid biosynthetic process;BP:sulfate reduction;BP:cysteine biosynthetic process;BP:cell redox homeostasis;BP:sulfate assimilation;BP:oxidation-reduction process;CC:plastid;CC:chloroplast stroma;CC:cell;CC:chloroplast;MF:4 iron, 4 sulfur cluster binding;MF:metal ion binding;MF:iron-sulfur cluster binding;MF:adenylyl-sulfate reductas;MF:adenylyl-sulfate reductase activity;MF:catal…	K05907	APR	map00920	Sulfur metabolism	COG0175	K:Transcription	NP_192370.1	APS reductase 1 [Arabidopsis thaliana]	sp|P92979|APR1_ARATH;	5'-adenylylsulfate reductase 1, chloroplastic OS=Arabidopsis thaliana OX=3702 GN=APR1 PE=1 SV=2;	PF01507.20;PF00085.21;PF13098.7	PAPS_reduct;Thioredoxin;Thioredoxin_2	Phosphoadenosine phosphosulfate reductase family;Thioredoxin;Thioredoxin-like domain
AT3G06890		At3g06890 [Source:UniProtKB/TrEMBL;Acc:Q9M910]	9.162	3.19559	5.74798e-07	4.75626e-06	yes	up	0.25	0.24	0.41	3.12	3.41	3.42	0.3	3.31667	GO:0008150;GO:0016021;GO:001602	BP:biological_process;CC:integral component of membrane;CC:membrane;	------	------	------	------	ENOG410Z0WX	S:Function unknown	NP_566295.1	transmembrane protein [Arabidopsis thaliana]	------	------	------	------	------
AT5G42860		Emb [Source:UniProtKB/TrEMBL;Acc:Q9FMN3]	9.093	3.18483	7.84949e-07	6.34606e-06	yes	up	0.12	0.19	0.12	1.79	1.78	1.37	0.143333	1.64667	GO:0008150;GO:0016020;GO:0016021;GO:0005802;GO:000588	BP:biological_process;CC:membrane;CC:integral component of membrane;CC:trans-Golgi network;CC:plasma membrane;	------	------	------	------	ENOG41108AY;ENOG410YGAR	S:Function unknown;	NP_199100.1	late embryogenesis abundant protein, group 2 [Arabidopsis thaliana]	------	------	PF03168.14	LEA_2	Late embryogenesis abundant protein
AT5G16190	ATCSLA11	cellulose synthase like A11 [Source:TAIR;Acc:AT5G16190]	9.034	3.1753	1.33272e-11	2.20727e-10	yes	up	0.31	0.26	0.13	2.02	3.03	3.48	0.233333	2.84333	GO:0016021;GO:001602	CC:integral component of membrane;CC:membrane;	K13680	CSLA	------	------	COG1215	M:Cell wall/membrane/envelope biogenesis	NP_001330941.1	cellulose synthase like A11 [Arabidopsis thaliana]	sp|Q9LF09|CSLAB_ARATH;	Probable glucomannan 4-beta-mannosyltransferase 11 OS=Arabidopsis thaliana OX=3702 GN=CSLA11 PE=2 SV=2;	PF13632.7;PF13641.7;PF00535.27;PF13506.7	Glyco_trans_2_3;Glyco_tranf_2_3;Glycos_transf_2;Glyco_transf_21	Glycosyl transferase family group 2;Glycosyltransferase like family 2;Glycosyl transferase family 2;Glycosyl transferase family 21
AT4G16820	PLA-I{beta]2	Phospholipase A1-Ibeta2, chloroplastic [Source:UniProtKB/Swiss-Prot;Acc:O23522]	9.03	3.17476	0.00560026	0.0181092	yes	up	0.06	0.03	0.03	0.16	0.8	0.29	0.04	0.416667	GO:0006629;GO:0016042;GO:0009536;GO:0009507;GO:0016787;GO:0004806;GO:0008970;GO:0047714;GO:000462	BP:lipid metabolic process;BP:lipid catabolic process;CC:plastid;CC:chloroplast;MF:hydrolase activity;MF:triglyceride lipase activity;MF:phosphatidylcholine 1-acylhydrolase activity;MF:galactolipase activity;MF:phospholipase activity;	------	------	------	------	ENOG4111RPC	S:Function unknown	NP_567515.1	alpha/beta-Hydrolases superfamily protein [Arabidopsis thaliana]	sp|O23522|PLA14_ARATH;	Phospholipase A1-Ibeta2, chloroplastic OS=Arabidopsis thaliana OX=3702 GN=At4g16820 PE=1 SV=2;	PF01764.26	Lipase_3	Lipase
AT1G26240		Proline-rich extensin-like family protein [Source:UniProtKB/TrEMBL;Acc:Q9C668]	8.962	3.16385	7.5376e-07	6.11001e-06	yes	up	0.25	0.03	0.35	1.16	3.61	2.07	0.21	2.28	GO:0009664;GO:000519	BP:plant-type cell wall organization;MF:structural constituent of cell wall;	------	------	------	------	------	------	NP_173948.1	Proline-rich extensin-like family protein [Arabidopsis thaliana]	------	------	PF04554.14	Extensin_2	Extensin-like region
AT1G68740	PHO1-H1	Phosphate transporter PHO1 homolog 1 [Source:UniProtKB/Swiss-Prot;Acc:Q93ZF5]	8.957	3.16294	0.000309323	0.00141887	yes	up	0.03	0.05	0.02	0.28	0.36	0.46	0.0333333	0.366667	GO:0006817;GO:0016036;GO:0035435;GO:0005737;GO:0005794;GO:0016021;GO:0016020;GO:0005886;GO:0000822;GO:001511	BP:phosphate ion transport;BP:cellular response to phosphate starvation;BP:phosphate ion transmembrane transport;CC:cytoplasm;CC:Golgi apparatus;CC:integral component of membrane;CC:membrane;CC:plasma membrane;MF:inositol hexakisphosphate binding;MF:phosphate ion transmembrane transporter activity;	------	------	------	------	COG5409	U:Intracellular trafficking, secretion, and vesicular transport	NP_564940.1	EXS (ERD1/XPR1/SYG1) family protein [Arabidopsis thaliana]	sp|Q93ZF5|PHO11_ARATH;	Phosphate transporter PHO1 homolog 1 OS=Arabidopsis thaliana OX=3702 GN=PHO1-H1 PE=2 SV=1;	PF03124.15;PF03105.20	EXS;SPX	EXS family;SPX domain
AT5G55340	AT5	Probable long-chain-alcohol O-fatty-acyltransferase 5 [Source:UniProtKB/Swiss-Prot;Acc:Q9FJ76]	8.955	3.16271	0.0120573	0.035024	yes	up	0.08	0.04	0	0.35	0.65	0.34	0.04	0.446667	GO:0006629;GO:0016021;GO:0016020;GO:0102966;GO:0016740;GO:0016746;GO:0008374;GO:004719	BP:lipid metabolic process;CC:integral component of membrane;CC:membrane;MF:arachidoyl-Co;MF:transferase activity;MF:transferase activity, transferring acyl groups;MF:O-acyltransferase activity;MF:long-chain-alcohol O-fatty-acyltransferase activity;	------	------	------	------	ENOG410Y3K5	S:Function unknown	NP_200345.1	MBOAT (membrane bound O-acyl transferase) family protein [Arabidopsis thaliana]	sp|Q9FJ76|WAXS5_ARATH;	Probable long-chain-alcohol O-fatty-acyltransferase 5 OS=Arabidopsis thaliana OX=3702 GN=AT5 PE=2 SV=1;	PF13813.7	MBOAT_2	Membrane bound O-acyl transferase family
AT4G39950	CYP79B2	cytochrome P450, family 79, subfamily B, polypeptide 2 [Source:TAIR;Acc:AT4G39950]	8.943	3.16072	4.80309e-52	1.33994e-49	yes	up	6.68	6.33	6.32	56.91	104.88	55.38	6.44333	72.39	GO:0009617;GO:0006952;GO:0052544;GO:0002229;GO:0009682;GO:0009625;GO:0006569;GO:0009684;GO:0010120;GO:0042742;GO:0009414;GO:0055114;GO:0016020;GO:0016021;GO:0004497;GO:0020037;GO:0016709;GO:0016705;GO:0005506;GO:0046872;GO:001649	BP:response to bacterium;BP:defense response;BP:defense response by callose deposition in cell wall;BP:defense response to oomycetes;BP:induced systemic resistance;BP:response to insect;BP:tryptophan catabolic process;BP:indoleacetic acid biosynthetic process;BP:camalexin biosynthetic process;BP:defense response to bacterium;BP:response to water deprivation;BP:oxidation-reduction process;CC:membr…	K11812	CYP79B1_2	map00380;map00966	Tryptophan metabolism;Glucosinolate biosynthesis	COG2124	G:Carbohydrate transport and metabolism	NP_001328605.1	cytochrome P450, family 79, subfamily B, polypeptide 2 [Arabidopsis thaliana]	sp|O81346|C79B2_ARATH;	Tryptophan N-monooxygenase 1 OS=Arabidopsis thaliana OX=3702 GN=CYP79B2 PE=1 SV=2;	PF00067.23	p450	Cytochrome P450
AT1G06090		Delta-9 desaturase-like 1 protein [Source:UniProtKB/Swiss-Prot;Acc:Q9LND9]	8.912	3.15581	0.000802532	0.0033076	yes	up	0.09	0.04	0	0.66	0.52	0.31	0.0433333	0.496667	GO:0006633;GO:0006631;GO:0006629;GO:0055114;GO:0006636;GO:0016021;GO:0016020;GO:0005789;GO:0005783;GO:0009979;GO:0016491;GO:001671	BP:fatty acid biosynthetic process;BP:fatty acid metabolic process;BP:lipid metabolic process;BP:oxidation-reduction process;BP:unsaturated fatty acid biosynthetic process;CC:integral component of membrane;CC:membrane;CC:endoplasmic reticulum membrane;CC:endoplasmic reticulum;MF:1;MF:oxidoreductase activity;MF:oxidoreductase activity, acting on paired donors, with oxidation of a pair of donors re…	K20416	FAD5	------	------	COG1398	I:Lipid transport and metabolism	NP_172099.1	Fatty acid desaturase family protein [Arabidopsis thaliana]	sp|Q9LND9|ADSL1_ARATH;	Delta-9 desaturase-like 1 protein OS=Arabidopsis thaliana OX=3702 GN=At1g06090 PE=2 SV=1;	PF00487.25	FA_desaturase	Fatty acid desaturase
AT1G26380	FOX1	Berberine bridge enzyme-like 3 [Source:UniProtKB/Swiss-Prot;Acc:Q9FZC4]	8.902	3.15407	1.32498e-07	1.21166e-06	yes	up	3.06	4.19	5.23	26.54	83.48	27.53	4.16	45.85	GO:0071456;GO:0055114;GO:0005783;GO:0005618;GO:0016020;GO:0005576;GO:0005886;GO:0050660;GO:0000166;GO:0071949;GO:001649	BP:cellular response to hypoxia;BP:oxidation-reduction process;CC:endoplasmic reticulum;CC:cell wall;CC:membrane;CC:extracellular region;CC:plasma membrane;MF:flavin adenine dinucleotide binding;MF:nucleotide binding;MF:FAD binding;MF:oxidoreductase activity;	------	------	------	------	COG0277	S:Function unknown	NP_564244.1	FAD-binding Berberine family protein [Arabidopsis thaliana]	sp|Q9FZC4|FOX1_ARATH;	Berberine bridge enzyme-like 3 OS=Arabidopsis thaliana OX=3702 GN=FOX1 PE=2 SV=1;	PF01565.24;PF08031.13	FAD_binding_4;BBE	FAD binding domain;Berberine and berberine like
AT1G78370	GSTU20	Glutathione S-transferase U20 [Source:UniProtKB/Swiss-Prot;Acc:Q8L7C9]	8.898	3.15344	1.15763e-68	8.57488e-66	yes	up	5.81	5.1	3.86	47.48	63.33	50.04	4.92333	53.6167	GO:0009629;GO:0006749;GO:0009636;GO:0040008;GO:2000030;GO:0009407;GO:0005737;GO:0005634;GO:0005739;GO:0048046;GO:0005829;GO:0009507;GO:0004364;GO:0016740;GO:0019899;GO:0005515;GO:004329	BP:response to gravity;BP:glutathione metabolic process;BP:response to toxic substance;BP:regulation of growth;BP:regulation of response to red or far red light;BP:toxin catabolic process;CC:cytoplasm;CC:nucleus;CC:mitochondrion;CC:apoplast;CC:cytosol;CC:chloroplast;MF:glutathione transferase activity;MF:transferase activity;MF:enzyme binding;MF:protein binding;MF:glutathione binding;	K00799	GST, gst	map00480	Glutathione metabolism	ENOG410XSIX	O:Posttranslational modification, protein turnover, chaperones	NP_177958.1	glutathione S-transferase TAU 20 [Arabidopsis thaliana]	sp|Q8L7C9|GSTUK_ARATH;	Glutathione S-transferase U20 OS=Arabidopsis thaliana OX=3702 GN=GSTU20 PE=1 SV=1;	PF02798.21;PF13417.7;PF13410.7;PF00043.26;PF13409.7;PF14497.7	GST_N;GST_N_3;GST_C_2;GST_C;GST_N_2;GST_C_3	Glutathione S-transferase, N-terminal domain;Glutathione S-transferase, N-terminal domain;Glutathione S-transferase, C-terminal domain;Glutathione S-transferase, C-terminal domain;Glutathione S-transferase, N-terminal domain;Glutathione S-transferase, C-terminal domain
AT3G13650	DIR7	Dirigent protein 7 [Source:UniProtKB/Swiss-Prot;Acc:Q9LID5]	8.873	3.14939	0.000605233	0.00257332	yes	up	0.22	0	0.11	1.41	1.17	0.94	0.11	1.17333	GO:0048046;GO:000557	CC:apoplast;CC:extracellular region;	------	------	------	------	ENOG410ZQVA	S:Function unknown	NP_187974.1	Disease resistance-responsive (dirigent-like protein) family protein [Arabidopsis thaliana]	sp|Q9LID5|DIR7_ARATH;	Dirigent protein 7 OS=Arabidopsis thaliana OX=3702 GN=DIR7 PE=2 SV=1;	PF03018.15	Dirigent	Dirigent-like protein
AT4G21760	BGLU47	beta-glucosidase 47 [Source:TAIR;Acc:AT4G21760]	8.833	3.14287	0.000288902	0.00133518	yes	up	0	0.09	0.13	0.83	1.04	0.56	0.0733333	0.81	GO:0005975;GO:0008152;GO:0016021;GO:0016787;GO:0016798;GO:0008422;GO:0102483;GO:000455	BP:carbohydrate metabolic process;BP:metabolic process;CC:integral component of membrane;MF:hydrolase activity;MF:hydrolase activity, acting on glycosyl bonds;MF:beta-glucosidase activity;MF:scopolin beta-glucosidase activity;MF:hydrolase activity, hydrolyzing O-glycosyl compounds;	K05350	bglB	map00460;map00940;map00500	Cyanoamino acid metabolism;Phenylpropanoid biosynthesis;Starch and sucrose metabolism	COG2723	K:Transcription	NP_001328261.1	beta-glucosidase 47 [Arabidopsis thaliana]	sp|Q9SVS1|BGL47_ARATH;	Beta-glucosidase 47 OS=Arabidopsis thaliana OX=3702 GN=BGLU47 PE=3 SV=2;	PF00232.19	Glyco_hydro_1	Glycosyl hydrolase family 1
AT1G06620		1-aminocyclopropane-1-carboxylate oxidase homolog 1 [Source:UniProtKB/Swiss-Prot;Acc:Q84MB3]	8.761	3.13114	4.18808e-31	4.18438e-29	yes	up	1.18	1.42	1.43	9.8	16.41	15.54	1.34333	13.9167	GO:0055114;GO:0005576;GO:0046872;GO:0051213;GO:001649	BP:oxidation-reduction process;CC:extracellular region;MF:metal ion binding;MF:dioxygenase activity;MF:oxidoreductase activity;	------	------	------	------	COG3491	O:Posttranslational modification, protein turnover, chaperones	NP_172147.2	2-oxoglutarate (2OG) and Fe(II)-dependent oxygenase superfamily protein [Arabidopsis thaliana]	sp|Q84MB3|ACCH1_ARATH;	1-aminocyclopropane-1-carboxylate oxidase homolog 1 OS=Arabidopsis thaliana OX=3702 GN=At1g06620 PE=2 SV=1;	PF03171.21;PF14226.7	2OG-FeII_Oxy;DIOX_N	2OG-F;non-haem dioxygenase in morphine synthesis N-terminal
AT2G44840	ERF13	Ethylene-responsive transcription factor 13 [Source:UniProtKB/Swiss-Prot;Acc:Q8L9K1]	8.705	3.12191	1.25411e-15	3.28932e-14	yes	up	0.99	0.37	1.11	11.31	7.73	7.05	0.823333	8.69667	GO:0010200;GO:0009873;GO:0006952;GO:0006355;GO:0005634;GO:0044212;GO:0003700;GO:0000976;GO:0005515;GO:000367	BP:response to chitin;BP:ethylene-activated signaling pathway;BP:defense response;BP:regulation of transcription, DNA-templated;CC:nucleus;MF:transcription regulatory region DNA binding;MF:transcription factor activity, sequence-specific DNA binding;MF:transcription regulatory region sequence-specific DNA binding;MF:protein binding;MF:DNA binding;	K09286	EREBP	------	------	ENOG41116MW	K:Transcription	NP_182011.1	ethylene-responsive element binding factor 13 [Arabidopsis thaliana]	sp|Q8L9K1|ERF99_ARATH;	Ethylene-responsive transcription factor 13 OS=Arabidopsis thaliana OX=3702 GN=ERF13 PE=2 SV=2;	PF00847.21	AP2	AP2 domain
AT4G14680	APS3	Pseudouridine synthase/archaeosine transglycosylase-like family protein [Source:TAIR;Acc:AT4G14680]	8.563	3.0981	4.18587e-52	1.19889e-49	yes	up	5.03	3.32	2.68	30.55	44.13	41.17	3.67667	38.6167	GO:0070206;GO:0000103;GO:0009970;GO:0070814;GO:0009570;GO:0009507;GO:0016779;GO:0000166;GO:0016740;GO:0004781;GO:000552	BP:protein trimerization;BP:sulfate assimilation;BP:cellular response to sulfate starvation;BP:hydrogen sulfide biosynthetic process;CC:chloroplast stroma;CC:chloroplast;MF:nucleotidyltransferase activity;MF:nucleotide binding;MF:transferase activity;MF:sulfate adenylyltransferas;MF:ATP binding;	K13811	PAPSS	map00450;map00261;map00230;map00920	Selenocompound metabolism;Monobactam biosynthesis;Purine metabolism;Sulfur metabolism	COG2046	P:Inorganic ion transport and metabolism	NP_001329676.1	Pseudouridine synthase/archaeosine transglycosylase-like family protein [Arabidopsis thaliana]	sp|O23324|APS3_ARATH;	ATP-sulfurylase 3, chloroplastic OS=Arabidopsis thaliana OX=3702 GN=APS3 PE=1 SV=1;	PF01747.18;PF14306.7	ATP-sulfurylase;PUA_2	ATP-sulfurylase;PUA-like domain
AT4G11460	CRK30	Putative cysteine-rich receptor-like protein kinase 30 [Source:UniProtKB/Swiss-Prot;Acc:Q9LDT0]	8.492	3.08609	8.54219e-39	1.25681e-36	yes	up	1.92	1.76	1.54	22.71	11.96	19.77	1.74	18.1467	GO:0006468;GO:0016310;GO:0042742;GO:0016020;GO:0016021;GO:0005886;GO:0004672;GO:0106311;GO:0000166;GO:0004674;GO:0016740;GO:0016301;GO:0005524;GO:010631	BP:protein phosphorylation;BP:phosphorylation;BP:defense response to bacterium;CC:membrane;CC:integral component of membrane;CC:plasma membrane;MF:protein kinase activity;MF:old GO;MF:nucleotide binding;MF:protein serine/threonine kinase activity;MF:transferase activity;MF:kinase activity;MF:ATP binding;MF:old GO;	------	------	------	------	COG0515	T:Signal transduction mechanisms	NP_192885.1	cysteine-rich RLK (RECEPTOR-like protein kinase) 30 [Arabidopsis thaliana]	sp|Q9LDT0|CRK30_ARATH;	Putative cysteine-rich receptor-like protein kinase 30 OS=Arabidopsis thaliana OX=3702 GN=CRK30 PE=3 SV=1;	PF07714.18;PF00069.26;PF01657.18	PK_Tyr_Ser-Thr;Pkinase;Stress-antifung	Protein tyrosine and serine/threonine kinase;Protein kinase domain;Salt stress response/antifungal
AT1G51920		unknown protein; FUNCTIONS IN: molecular_function unknown; INVOLVED IN: biological_process unknown; LOCATED IN: endomembrane system; EXPRESSED IN: stem, stamen; EXPRESSED DURING: 4 anthesis; Ha. [Source:TAIR;Acc:AT1G51920]	8.482	3.08432	0.00491047	0.016208	yes	up	0.51	1.6	0.45	4.43	21.68	4.02	0.853333	10.0433	GO:0008150;GO:0016021;GO:000367	BP:biological_process;CC:integral component of membrane;MF:molecular_function;	------	------	------	------	ENOG411153R;ENOG41115TU	S:Function unknown;	NP_175604.1	transmembrane protein [Arabidopsis thaliana]	------	------	------	------	------
AT5G67080	MAPKKK19	Mitogen-activated protein kinase kinase kinase 19 [Source:UniProtKB/TrEMBL;Acc:Q9FHA5]	8.373	3.06581	6.49574e-19	2.361e-17	yes	up	0.65	0.79	0.66	5.87	6.68	9.15	0.7	7.23333	GO:0006468;GO:0031098;GO:0016310;GO:0007346;GO:0023014;GO:0032147;GO:0005737;GO:0016301;GO:0000166;GO:0019901;GO:0004674;GO:0016740;GO:0004672;GO:000552	BP:protein phosphorylation;BP:stress-activated protein kinase signaling cascade;BP:phosphorylation;BP:regulation of mitotic cell cycle;BP:signal transduction by protein phosphorylation;BP:activation of protein kinase activity;CC:cytoplasm;MF:kinase activity;MF:nucleotide binding;MF:protein kinase binding;MF:protein serine/threonine kinase activity;MF:transferase activity;MF:protein kinase activit…	------	------	------	------	ENOG410XQGS	T:Signal transduction mechanisms	NP_201509.1	mitogen-activated protein kinase kinase kinase 19 [Arabidopsis thaliana]	sp|Q9SND6|M3K20_ARATH;	Mitogen-activated protein kinase kinase kinase 20 OS=Arabidopsis thaliana OX=3702 GN=MAPKKK20 PE=1 SV=1;	PF00069.26;PF07714.18	Pkinase;PK_Tyr_Ser-Thr	Protein kinase domain;Protein tyrosine and serine/threonine kinase
AT5G11140		Phospholipase-like protein (PEARLI 4) family protein [Source:UniProtKB/TrEMBL;Acc:Q9LFP2]	8.361	3.06363	0.00152666	0.00584671	yes	up	0.2	0.19	0.07	0.7	3.31	0.74	0.153333	1.58333	GO:0006486;GO:0005575;GO:0016021;GO:001675	BP:protein glycosylation;CC:cellular_component;CC:integral component of membrane;MF:transferase activity, transferring glycosyl groups;	------	------	------	------	ENOG410XTFH;ENOG41105EW;ENOG410Z5M3;ENOG41106MP	S:Function unknown;	NP_196675.1	phospholipase-like protein (PEARLI 4) family protein [Arabidopsis thaliana]	------	------	PF05278.13	PEARLI-4	Arabidopsis phospholipase-like protein
AT1G45010		TRAM, LAG1 and CLN8 (TLC) lipid-sensing domain containing protein [Source:UniProtKB/TrEMBL;Acc:Q8VZR3]	8.328	3.05803	1.43526e-14	3.31514e-13	yes	up	1.29	0.87	0.35	9.08	9.34	7.78	0.836667	8.73333	GO:0008150;GO:0016021;GO:001602	BP:biological_process;CC:integral component of membrane;CC:membrane;	------	------	------	------	ENOG410Z5I9	O:Posttranslational modification, protein turnover, chaperones	NP_175121.2	TRAM, LAG1 and CLN8 (TLC) lipid-sensing domain containing protein [Arabidopsis thaliana]	sp|Q6ZRR5|TLCD5_HUMAN;	TLC domain-containing protein 5 OS=Homo sapiens OX=9606 GN=TLCD5 PE=2 SV=2;	PF03798.17	TRAM_LAG1_CLN8	TLC domain
AT1G24020	MLP423	MLP-like protein 423 [Source:UniProtKB/Swiss-Prot;Acc:Q93VR4]	8.313	3.05543	1.22696e-35	1.5413e-33	yes	up	5.73	3.65	2.71	44.81	30.82	44.85	4.03	40.16	GO:0032515;GO:0009738;GO:0006952;GO:0005634;GO:0005829;GO:0004864;GO:0038023;GO:001042	BP:negative regulation of phosphoprotein phosphatase activity;BP:abscisic acid-activated signaling pathway;BP:defense response;CC:nucleus;CC:cytosol;MF:protein phosphatase inhibitor activity;MF:signaling receptor activity;MF:abscisic acid binding;	------	------	------	------	ENOG410YSJN	S:Function unknown	NP_001185075.1	MLP-like protein 423 [Arabidopsis thaliana]	sp|Q93VR4|ML423_ARATH;	MLP-like protein 423 OS=Arabidopsis thaliana OX=3702 GN=MLP423 PE=2 SV=1;	PF00407.20;PF10604.10	Bet_v_1;Polyketide_cyc2	Pathogenesis-related protein Bet v 1 family;Polyketide cyclase / dehydrase and lipid transport
AT1G07160		PP2C-type phosphatase AP2C2 [Source:UniProtKB/TrEMBL;Acc:F6LPR6]	8.31	3.05476	0.00843462	0.0257565	yes	up	0.4	0.46	0.67	1.44	13.45	0.86	0.51	5.25	GO:0006470;GO:0016787;GO:0016791;GO:0043169;GO:0004724;GO:0004722;GO:0004721;GO:0046872;GO:0106306;GO:010630	BP:protein dephosphorylation;MF:hydrolase activity;MF:phosphatase activity;MF:cation binding;MF:magnesium-dependent protein serine/threonine phosphatase activity;MF:protein serine/threonine phosphatase activity;MF:phosphoprotein phosphatase activity;MF:metal ion binding;MF:old GO;MF:old GO;	K17506	PPM1L, PP2CE	------	------	COG0631	T:Signal transduction mechanisms	NP_172196.1	Protein phosphatase 2C family protein [Arabidopsis thaliana]	sp|Q8RX37|P2C02_ARATH;	Probable protein phosphatase 2C 2 OS=Arabidopsis thaliana OX=3702 GN=At1g07160 PE=2 SV=1;	PF00481.22;PF13672.7	PP2C;PP2C_2	Protein phosphatase 2C;Protein phosphatase 2C
AT5G59580	UGT76E1	UDP-glycosyltransferase 76E1 [Source:UniProtKB/Swiss-Prot;Acc:Q9LTH3]	8.306	3.05412	0.0159736	0.0443892	yes	up	0	0.04	0.07	0.39	0.23	0.27	0.0366667	0.296667	GO:0043231;GO:0016757;GO:0080043;GO:0016740;GO:0080044;GO:0016758;GO:000819	CC:intracellular membrane-bounded organelle;MF:transferase activity, transferring glycosyl groups;MF:quercetin 3-O-glucosyltransferase activity;MF:transferase activity;MF:quercetin 7-O-glucosyltransferase activity;MF:transferase activity, transferring hexosyl groups;MF:UDP-glycosyltransferase activity;	------	------	------	------	COG1819	S:Function unknown	NP_200766.2	UDP-glucosyl transferase 76E1 [Arabidopsis thaliana]	sp|Q9LTH3|U76E1_ARATH;	UDP-glycosyltransferase 76E1 OS=Arabidopsis thaliana OX=3702 GN=UGT76E1 PE=2 SV=1;	PF00201.19	UDPGT	UDP-glucoronosyl and UDP-glucosyl transferase
AT3G21240	4CL2	Cinnamyl alcohol dehydrogenase [Source:UniProtKB/TrEMBL;Acc:B1GUZ3]	8.266	3.04725	0.00156193	0.0059584	yes	up	0.26	0	0	1.2	0.86	0.6	0.0866667	0.886667	GO:0009698;GO:0016207;GO:0000166;GO:0016405;GO:0003824;GO:0016874;GO:000552	BP:phenylpropanoid metabolic process;MF:4-coumarate-CoA ligase activity;MF:nucleotide binding;MF:CoA-ligase activity;MF:catalytic activity;MF:ligase activity;MF:ATP binding;	K01904	4CL	map00130;map00940	Ubiquinone and other terpenoid-quinone biosynthesis;Phenylpropanoid biosynthesis	COG0318;COG0318	I:Lipid transport and metabolism;Q:Secondary metabolites biosynthesis, transport and catabolism	NP_188761.1	4-coumarate:CoA ligase 2 [Arabidopsis thaliana]	sp|Q9S725|4CL2_ARATH;	4-coumarate--CoA ligase 2 OS=Arabidopsis thaliana OX=3702 GN=4CL2 PE=1 SV=2;	PF00501.29;PF13193.7	AMP-binding;AMP-binding_C	AMP-binding enzyme;AMP-binding enzyme C-terminal domain
AT1G32640	MYC2	ZBF1 [Source:UniProtKB/TrEMBL;Acc:A0A178W7C3]	8.217	3.0386	1.6894e-09	2.11604e-08	yes	up	5.27	2.85	9.49	48.27	70.73	59.58	5.87	59.5267	GO:0051289;GO:0009963;GO:0010374;GO:0009737;GO:0009753;GO:0009738;GO:0009611;GO:0043619;GO:0090357;GO:0045893;GO:0009269;GO:0106167;GO:0051090;GO:0010200;GO:2000068;GO:0006355;GO:2000652;GO:0005634;GO:0003677;GO:0043565;GO:0019900;GO:0044212;GO:0003700;GO:0000976;GO:0005515;GO:004698	BP:protein homotetramerization;BP:positive regulation of flavonoid biosynthetic process;BP:stomatal complex development;BP:response to abscisic acid;BP:response to jasmonic acid;BP:abscisic acid-activated signaling pathway;BP:response to wounding;BP:regulation of transcription from RNA polymerase II promoter in response to oxidative stress;BP:regulation of tryptophan metabolic process;BP:positive…	K13422	MYC2	map04016;map04075	MAPK signaling pathway - plant;Plant hormone signal transduction	ENOG410YCJJ	K:Transcription	NP_174541.1	Basic helix-loop-helix (bHLH) DNA-binding family protein [Arabidopsis thaliana]	sp|Q39204|MYC2_ARATH;	Transcription factor MYC2 OS=Arabidopsis thaliana OX=3702 GN=MYC2 PE=1 SV=2;	PF14215.7;PF00010.27	bHLH-MYC_N;HLH	bHLH-MYC and R2R3-MYB transcription factors N-terminal;Helix-loop-helix DNA-binding domain
AT2G29460	GSTU4	Glutathione S-transferase U4 [Source:UniProtKB/Swiss-Prot;Acc:Q9ZW27]	8.14	3.02511	2.92454e-25	2.0007e-23	yes	up	2.5	1.51	2.02	13.8	27.56	18.69	2.01	20.0167	GO:0006749;GO:0009636;GO:0009407;GO:1900367;GO:0005737;GO:0005829;GO:0004364;GO:0016740;GO:000551	BP:glutathione metabolic process;BP:response to toxic substance;BP:toxin catabolic process;BP:positive regulation of defense response to insect;CC:cytoplasm;CC:cytosol;MF:glutathione transferase activity;MF:transferase activity;MF:protein binding;	K00799	GST, gst	map00480	Glutathione metabolism	ENOG410XSIX	O:Posttranslational modification, protein turnover, chaperones	NP_180507.1	glutathione S-transferase tau 4 [Arabidopsis thaliana]	sp|Q9ZW27|GSTU4_ARATH;	Glutathione S-transferase U4 OS=Arabidopsis thaliana OX=3702 GN=GSTU4 PE=1 SV=1;	PF02798.21;PF13417.7;PF13409.7;PF13410.7;PF00043.26	GST_N;GST_N_3;GST_N_2;GST_C_2;GST_C	Glutathione S-transferase, N-terminal domain;Glutathione S-transferase, N-terminal domain;Glutathione S-transferase, N-terminal domain;Glutathione S-transferase, C-terminal domain;Glutathione S-transferase, C-terminal domain
AT5G13990	ATEXO70C2	Exocyst subunit Exo70 family protein [Source:UniProtKB/TrEMBL;Acc:A0A178UPG0]	7.966	2.99392	0.00323316	0.0112911	yes	up	0.05	0.04	0.02	0.59	0.21	0.31	0.0366667	0.37	GO:0080092;GO:0006887;GO:0015031;GO:0000145;GO:0005634;GO:0090406;GO:0005829;GO:000551	BP:regulation of pollen tube growth;BP:exocytosis;BP:protein transport;CC:exocyst;CC:nucleus;CC:pollen tube;CC:cytosol;MF:protein binding;	K07195	EXOC7, EXO70	------	------	ENOG410YIGI	G:Carbohydrate transport and metabolism	NP_196903.1	exocyst subunit exo70 family protein C2 [Arabidopsis thaliana]	sp|Q9FGH9|E70B1_ARATH;	Exocyst complex component EXO70B1 OS=Arabidopsis thaliana OX=3702 GN=EXO70B1 PE=1 SV=1;	PF03081.16	Exo70	Exo70 exocyst complex subunit
AT3G02840		ARM repeat superfamily protein [Source:UniProtKB/TrEMBL;Acc:Q9M8S5]	7.889	2.97983	0.00407561	0.0137871	yes	up	0.64	1.43	0.88	2.81	17.16	2.44	0.983333	7.47	GO:0010193;GO:0005737;GO:000563	BP:response to ozone;CC:cytoplasm;CC:nucleus;	------	------	------	------	ENOG41105F6	S:Function unknown	NP_566184.1	ARM repeat superfamily protein [Arabidopsis thaliana]	sp|Q5PNY6|PUB21_ARATH;	U-box domain-containing protein 21 OS=Arabidopsis thaliana OX=3702 GN=PUB21 PE=2 SV=1;	------	------	------
AT3G19615		Beta-1,4-xylosidase [Source:UniProtKB/TrEMBL;Acc:A8MR54]	7.888	2.97971	0.000212031	0.00101621	yes	up	0.5	0.47	1.51	3.75	13.81	5.88	0.826667	7.81333	GO:0045493;GO:0005975;GO:0008150;GO:0031222;GO:0005618;GO:0009505;GO:0005576;GO:0046556;GO:0004553;GO:0003674;GO:000904	BP:xylan catabolic process;BP:carbohydrate metabolic process;BP:biological_process;BP:arabinan catabolic process;CC:cell wall;CC:plant-type cell wall;CC:extracellular region;MF:alpha-L-arabinofuranosidase activity;MF:hydrolase activity, hydrolyzing O-glycosyl compounds;MF:molecular_function;MF:xylan 1,4-beta-xylosidase activity;	K15920	XYL4	map00520	Amino sugar and nucleotide sugar metabolism	COG1472;ENOG4111EDR	G:Carbohydrate transport and metabolism;S:Function unknown	BAB02547.1	beta-1,4-xylosidase [Arabidopsis thaliana]	------	------	------	------	------
AT5G65230	AtMYB53	Transcription factor MYB53 [Source:UniProtKB/Swiss-Prot;Acc:Q9FJP2]	7.884	2.97891	0.00382163	0.0130306	yes	up	0	0.08	0.13	0.86	0.77	0.44	0.07	0.69	GO:0030154;GO:0006355;GO:0005634;GO:0043565;GO:0044212;GO:0003700;GO:0000976;GO:0005515;GO:000367	BP:cell differentiation;BP:regulation of transcription, DNA-templated;CC:nucleus;MF:sequence-specific DNA binding;MF:transcription regulatory region DNA binding;MF:transcription factor activity, sequence-specific DNA binding;MF:transcription regulatory region sequence-specific DNA binding;MF:protein binding;MF:DNA binding;	K09422	MYBP	------	------	COG5147	K:Transcription	NP_201326.1	myb domain protein 53 [Arabidopsis thaliana]	sp|Q9FJP2|MYB53_ARATH;	Transcription factor MYB53 OS=Arabidopsis thaliana OX=3702 GN=MYB53 PE=1 SV=1;	PF00249.32;PF13921.7	Myb_DNA-binding;Myb_DNA-bind_6	Myb-like DNA-binding domain;Myb-like DNA-binding domain
AT1G19670	CLH1	Chlorophyllase-1 [Source:UniProtKB/Swiss-Prot;Acc:O22527]	7.84	2.97077	8.46856e-118	4.54783e-114	yes	up	10.5	7.54	8.63	79.62	92.97	83.63	8.89	85.4067	GO:0015996;GO:0050832;GO:0006952;GO:0042742;GO:0005737;GO:0005773;GO:0005634;GO:0005829;GO:0102293;GO:0016787;GO:004774	BP:chlorophyll catabolic process;BP:defense response to fungus;BP:defense response;BP:defense response to bacterium;CC:cytoplasm;CC:vacuole;CC:nucleus;CC:cytosol;MF:pheophytinase b activity;MF:hydrolase activity;MF:chlorophyllase activity;	K08099	E3.1.1.14	map00860	Porphyrin and chlorophyll metabolism	ENOG410XWBW	I:Lipid transport and metabolism	NP_564094.1	chlorophyllase 1 [Arabidopsis thaliana]	sp|O22527|CLH1_ARATH;	Chlorophyllase-1 OS=Arabidopsis thaliana OX=3702 GN=CLH1 PE=1 SV=1;	PF07224.12;PF12740.8;PF03403.14;PF00756.21	Chlorophyllase;Chlorophyllase2;PAF-AH_p_II;Esterase	Chlorophyllase;Chlorophyllase enzyme;Platelet-activating factor acetylhydrolase, isoform II;Putative esterase
AT4G24580	REN1	Rho GTPase-activating protein REN1 [Source:UniProtKB/Swiss-Prot;Acc:F4JQZ3]	7.838	2.97052	0.000321437	0.00146786	yes	up	0.11	0.06	0	0.3	1.03	0.48	0.0566667	0.603333	GO:0043547;GO:0090630;GO:0040008;GO:0009860;GO:0009865;GO:0048868;GO:0035024;GO:0009846;GO:0007165;GO:0045177;GO:0016020;GO:0016324;GO:0070382;GO:0005938;GO:0005886;GO:0090406;GO:0017048;GO:0005096;GO:003126	BP:positive regulation of GTPase activity;BP:activation of GTPase activity;BP:regulation of growth;BP:pollen tube growth;BP:pollen tube adhesion;BP:pollen tube development;BP:negative regulation of Rho protein signal transduction;BP:pollen germination;BP:signal transduction;CC:apical part of cell;CC:membrane;CC:apical plasma membrane;CC:exocytic vesicle;CC:cell cortex;CC:plasma membrane;CC:pollen…	------	------	------	------	ENOG410XR4E	S:Function unknown	NP_001320057.1	Rho GTPase activation protein (RhoGAP) with PH domain-containing protein [Arabidopsis thaliana]	sp|F4JQZ3|REN1_ARATH;	Rho GTPase-activating protein REN1 OS=Arabidopsis thaliana OX=3702 GN=REN1 PE=1 SV=2;	PF00620.28;PF14389.7;PF00169.30	RhoGAP;Lzipper-MIP1;PH	RhoGAP domain;Leucine-zipper of ternary complex factor MIP1;PH domain
AT4G30570		Probable mannose-1-phosphate guanylyltransferase 3 [Source:UniProtKB/Swiss-Prot;Acc:Q8H1Q7]	7.817	2.96669	3.20974e-05	0.000186196	yes	up	0.29	0	0.37	1.84	2.92	1.6	0.22	2.12	GO:0009298;GO:0009058;GO:0016779;GO:0016740;GO:0004475;GO:0000166;GO:000552	BP:GDP-mannose biosynthetic process;BP:biosynthetic process;MF:nucleotidyltransferase activity;MF:transferase activity;MF:mannose-1-phosphate guanylyltransferase activity;MF:nucleotide binding;MF:GTP binding;	K00966	GMPP	map00520;map00051	Amino sugar and nucleotide sugar metabolism;Fructose and mannose metabolism	COG1208	U:Intracellular trafficking, secretion, and vesicular transport	CAB79775.1	GDP-mannose pyrophosphorylase like protein, partial [Arabidopsis thaliana]	sp|Q8H1Q7|GMPP3_ARATH;	Probable mannose-1-phosphate guanylyltransferase 3 OS=Arabidopsis thaliana OX=3702 GN=At4g30570 PE=2 SV=1;	PF00483.24;PF00132.25;PF12804.8	NTP_transferase;Hexapep;NTP_transf_3	Nucleotidyl transferase;Bacterial transferase hexapeptide;MobA-like NTP transferase domain
AT1G03200		At1g03200 [Source:UniProtKB/TrEMBL;Acc:B6IDH7]	7.743	2.95297	0.00921637	0.0277628	yes	up	0.19	0	0.78	3.35	2.71	3.06	0.323333	3.04	GO:0008150;GO:000557	BP:biological_process;CC:cellular_component;	------	------	------	------	------	------	NP_001318912.1	hypothetical protein AT1G03200 [Arabidopsis thaliana]	------	------	------	------	------
AT1G65790	SD17	Receptor-like serine/threonine-protein kinase SD1-7 [Source:UniProtKB/Swiss-Prot;Acc:Q39086]	7.719	2.94846	0.000740777	0.00309091	yes	up	0.17	0	0.05	0.25	1.17	0.65	0.0733333	0.69	GO:0009738;GO:0016310;GO:0046777;GO:0106311;GO:0106310;GO:0071215;GO:0006468;GO:0034613;GO:0048544;GO:0005634;GO:0016020;GO:0005886;GO:0005829;GO:0016021;GO:0030246;GO:0000166;GO:0004675;GO:0004674;GO:0016740;GO:0004672;GO:0005524;GO:0016301;GO:003162	BP:abscisic acid-activated signaling pathway;BP:phosphorylation;BP:protein autophosphorylation;BP:old GO;BP:old GO;BP:cellular response to abscisic acid stimulus;BP:protein phosphorylation;BP:cellular protein localization;BP:recognition of pollen;CC:nucleus;CC:membrane;CC:plasma membrane;CC:cytosol;CC:integral component of membrane;MF:carbohydrate binding;MF:nucleotide binding;MF:transmembrane re…	------	------	------	------	COG0515	T:Signal transduction mechanisms	AAF23832.1	F1E22.15 [Arabidopsis thaliana]	sp|Q39086|SD17_ARATH;	Receptor-like serine/threonine-protein kinase SD1-7 OS=Arabidopsis thaliana OX=3702 GN=SD17 PE=1 SV=1;	PF07714.18;PF00069.26;PF00954.21;PF01453.25;PF08276.12;PF11883.9;PF12398.9	PK_Tyr_Ser-Thr;Pkinase;S_locus_glycop;B_lectin;PAN_2;DUF3403;DUF3660	Protein tyrosine and serine/threonine kinase;Protein kinase domain;S-locus glycoprotein domain;D-mannose binding lectin;PAN-like domain;Domain of unknown function;Receptor serine/threonine kinase
AT4G37800	XTH7	Probable xyloglucan endotransglucosylase/hydrolase protein 7 [Source:UniProtKB/Swiss-Prot;Acc:Q8LER3]	7.632	2.93215	1.97359e-10	2.82068e-09	yes	up	18.44	9.1	9.87	164.3	71.21	111.51	12.47	115.673	GO:0042546;GO:0005975;GO:0006073;GO:0071555;GO:0008152;GO:0010411;GO:0005618;GO:0016021;GO:0048046;GO:0005576;GO:0016787;GO:0016798;GO:0016762;GO:0016740;GO:000455	BP:cell wall biogenesis;BP:carbohydrate metabolic process;BP:cellular glucan metabolic process;BP:cell wall organization;BP:metabolic process;BP:xyloglucan metabolic process;CC:cell wall;CC:integral component of membrane;CC:apoplast;CC:extracellular region;MF:hydrolase activity;MF:hydrolase activity, acting on glycosyl bonds;MF:xylogluca;MF:transferase activity;MF:hydrolase activity, hydrolyzing …	K08235	E2.4.1.207	------	------	COG2273	K:Transcription	NP_195494.1	xyloglucan endotransglucosylase/hydrolase 7 [Arabidopsis thaliana]	sp|Q8LER3|XTH7_ARATH;	Probable xyloglucan endotransglucosylase/hydrolase protein 7 OS=Arabidopsis thaliana OX=3702 GN=XTH7 PE=2 SV=2;	PF00722.22;PF06955.13	Glyco_hydro_16;XET_C	Glycosyl hydrolases family 16;Xyloglucan endo-transglycosylase
AT5G57010	IQM5	IQ domain-containing protein IQM5 [Source:UniProtKB/Swiss-Prot;Acc:Q058N0]	7.626	2.93085	5.58623e-05	0.00030745	yes	up	0.32	0.25	0.16	0.87	5.39	0.64	0.243333	2.3	GO:0008150;GO:0005737;GO:000563	BP:biological_process;CC:cytoplasm;CC:nucleus;	------	------	------	------	ENOG410XYNX	S:Function unknown	NP_200511.1	calmodulin-binding family protein [Arabidopsis thaliana]	sp|Q058N0|IQM5_ARATH;	IQ domain-containing protein IQM5 OS=Arabidopsis thaliana OX=3702 GN=IQM5 PE=2 SV=1;	------	------	------
AT1G02205	CER1	Fatty acid hydroxylase superfamily [Source:TAIR;Acc:AT1G02205]	7.588	2.92364	1.0424e-22	5.66883e-21	yes	up	0.33	0.51	0.45	4.65	3.86	3.7	0.43	4.07	GO:0050832;GO:0009414;GO:0042742;GO:0055114;GO:0010025;GO:0008610;GO:0043447;GO:0016021;GO:0016020;GO:0005789;GO:0009924;GO:0005506;GO:1990465;GO:001649	BP:defense response to fungus;BP:response to water deprivation;BP:defense response to bacterium;BP:oxidation-reduction process;BP:wax biosynthetic process;BP:lipid biosynthetic process;BP:alkane biosynthetic process;CC:integral component of membrane;CC:membrane;CC:endoplasmic reticulum membrane;MF:octadecanal decarbonylase activity;MF:iron ion binding;MF:aldehyde oxygenas;MF:oxidoreductase activi…	K15404	K15404, CER1	map00073	Cutin, suberine and wax biosynthesis	ENOG4111G66	S:Function unknown	NP_001184890.1	Fatty acid hydroxylase superfamily [Arabidopsis thaliana]	sp|F4HVY0|CER1_ARATH;	Very-long-chain aldehyde decarbonylase CER1 OS=Arabidopsis thaliana OX=3702 GN=CER1 PE=1 SV=1;	PF12076.9;PF04116.14	Wax2_C;FA_hydroxylase	WAX2 C-terminal domain;Fatty acid hydroxylase superfamily
AT5G61160	ACT	Agmatine coumaroyltransferase [Source:UniProtKB/Swiss-Prot;Acc:Q9FNP9]	7.51	2.90886	9.1987e-82	1.31731e-78	yes	up	3.37	3.52	3.03	30.67	33.22	27.96	3.30667	30.6167	GO:0047634;GO:0016740;GO:0016746;GO:001674	MF:agmatine N4-coumaroyltransferase activity;MF:transferase activity;MF:transferase activity, transferring acyl groups;MF:transferase activity, transferring acyl groups other than amino-acyl groups;	K14329	ACT	map00330	Arginine and proline metabolism	ENOG410Z33Z	S:Function unknown	NP_200924.1	anthocyanin 5-aromatic acyltransferase 1 [Arabidopsis thaliana]	sp|Q9FNP9|AGCT_ARATH;	Agmatine coumaroyltransferase OS=Arabidopsis thaliana OX=3702 GN=ACT PE=1 SV=1;	PF02458.16	Transferase	Transferase family
AT4G29030		Glycine-rich protein like [Source:UniProtKB/TrEMBL;Acc:Q9SZD3]	7.477	2.90251	1.29811e-21	6.16918e-20	yes	up	1.81	1.42	1.33	13.81	13.48	13.93	1.52	13.74	GO:000815	BP:biological_process;	------	------	------	------	ENOG41118QS	S:Function unknown	XP_002869457.2	glycine-rich protein 5 [Arabidopsis lyrata subsp. lyrata]	------	------	------	------	------
AT1G22470		At1g22470/F12K8_18 [Source:UniProtKB/TrEMBL;Acc:Q8L443]	7.45	2.89723	1.24025e-06	9.71971e-06	yes	up	0.33	0.31	0.83	3.9	3.05	6.27	0.49	4.40667	GO:0008150;GO:000557	BP:biological_process;CC:cellular_component;	------	------	------	------	ENOG41108D8;ENOG41103UV	C:Energy production and conversion;S:Function unknown	NP_173663.2	hypothetical protein AT1G22470 [Arabidopsis thaliana]	------	------	------	------	------
AT4G11280	ACS6	1-aminocyclopropane-1-carboxylate synthase 6 [Source:UniProtKB/Swiss-Prot;Acc:Q9SAR0]	7.446	2.89656	3.06492e-07	2.65795e-06	yes	up	2.3	3.52	7.46	49.04	46.57	27.25	4.42667	40.9533	GO:0009733;GO:0009835;GO:0009753;GO:0051301;GO:0010087;GO:0009611;GO:0009612;GO:0042218;GO:0006952;GO:0009058;GO:0009693;GO:0006979;GO:0016847;GO:0016829;GO:0003824;GO:0030170;GO:0005515;GO:004280	BP:response to auxin;BP:fruit ripening;BP:response to jasmonic acid;BP:cell division;BP:phloem or xylem histogenesis;BP:response to wounding;BP:response to mechanical stimulus;BP:1-aminocyclopropane-1-carboxylate biosynthetic process;BP:defense response;BP:biosynthetic process;BP:ethylene biosynthetic process;BP:response to oxidative stress;MF:1-aminocyclopropane-1-carboxylate synthase activity;M…	K20772	ACS1_2_6	map00270;map04016	Cysteine and methionine metabolism;MAPK signaling pathway - plant	COG0436	S:Function unknown	NP_192867.1	1-aminocyclopropane-1-carboxylic acid (acc) synthase 6 [Arabidopsis thaliana]	sp|Q9SAR0|1A16_ARATH;	1-aminocyclopropane-1-carboxylate synthase 6 OS=Arabidopsis thaliana OX=3702 GN=ACS6 PE=1 SV=2;	PF00155.22	Aminotran_1_2	Aminotransferase class I and II
AT3G04300		At3g04300 [Source:UniProtKB/TrEMBL;Acc:Q9M8Y6]	7.44	2.89531	0.011834	0.0344757	yes	up	0.08	0.24	0	1.11	1.04	0.83	0.106667	0.993333	GO:0008150;GO:000551	BP:biological_process;MF:protein binding;	------	------	------	------	COG3450	T:Signal transduction mechanisms	XP_009124999.2	uncharacterized protein LOC103850049 [Brassica rapa]	------	------	PF05899.13	Cupin_3	Protein of unknown function
AT3G15540	IAA19	Auxin-responsive protein [Source:UniProtKB/TrEMBL;Acc:Q2VWA2]	7.392	2.88602	9.83574e-09	1.09529e-07	yes	up	0.44	0.66	0.25	3.57	4.91	3.76	0.45	4.08	GO:0009733;GO:0080086;GO:0009734;GO:0006355;GO:0005634;GO:0003700;GO:0005515;GO:004280	BP:response to auxin;BP:stamen filament development;BP:auxin-activated signaling pathway;BP:regulation of transcription, DNA-templated;CC:nucleus;MF:transcription factor activity, sequence-specific DNA binding;MF:protein binding;MF:identical protein binding;	K14484	IAA	map04075	Plant hormone signal transduction	ENOG4111813	K:Transcription	NP_188173.1	indole-3-acetic acid inducible 19 [Arabidopsis thaliana]	sp|O24409|IAA19_ARATH;	Auxin-responsive protein IAA19 OS=Arabidopsis thaliana OX=3702 GN=IAA19 PE=1 SV=2;	PF02309.17	AUX_IAA	AUX/IAA family
AT1G60270	BGLU6	Putative beta-glucosidase 6 [Source:UniProtKB/Swiss-Prot;Acc:Q682B4]	7.392	2.88596	7.29851e-15	1.74524e-13	yes	up	0.63	0.69	0.31	5.09	3.46	6.08	0.543333	4.87667	GO:0005975;GO:0080167;GO:0008152;GO:0016787;GO:0016798;GO:0008422;GO:0102483;GO:0016740;GO:000455	BP:carbohydrate metabolic process;BP:response to karrikin;BP:metabolic process;MF:hydrolase activity;MF:hydrolase activity, acting on glycosyl bonds;MF:beta-glucosidase activity;MF:scopolin beta-glucosidase activity;MF:transferase activity;MF:hydrolase activity, hydrolyzing O-glycosyl compounds;	K01188;rsz	E3.2.1.21;	map00460;map00940;map00500	Cyanoamino acid metabolism;Phenylpropanoid biosynthesis;Starch and sucrose metabolism	COG2723	G:Carbohydrate transport and metabolism	CAA0304312.1	unnamed protein product [Arabidopsis thaliana]	sp|Q8RXN9|BGL05_ARATH;	Putative beta-glucosidase 5 OS=Arabidopsis thaliana OX=3702 GN=BGLU5 PE=5 SV=2;	PF00232.19	Glyco_hydro_1	Glycosyl hydrolase family 1
AT1G16490	MYB58	Transcription factor MYB58 [Source:UniProtKB/Swiss-Prot;Acc:Q9SA47]	7.367	2.88116	0.00800345	0.0246307	yes	up	0	0.28	0	0.9	1.05	0.78	0.0933333	0.91	GO:0009809;GO:0030154;GO:0009416;GO:0045893;GO:2000652;GO:0005634;GO:0043565;GO:0044212;GO:0003700;GO:0003677;GO:000097	BP:lignin biosynthetic process;BP:cell differentiation;BP:response to light stimulus;BP:positive regulation of transcription, DNA-templated;BP:regulation of secondary cell wall biogenesis;CC:nucleus;MF:sequence-specific DNA binding;MF:transcription regulatory region DNA binding;MF:transcription factor activity, sequence-specific DNA binding;MF:DNA binding;MF:transcription regulatory region sequen…	K09422	MYBP	------	------	COG5147	K:Transcription	NP_173098.1	myb domain protein 58 [Arabidopsis thaliana]	sp|Q9SA47|MYB58_ARATH;	Transcription factor MYB58 OS=Arabidopsis thaliana OX=3702 GN=MYB58 PE=2 SV=1;	PF00249.32;PF13921.7	Myb_DNA-binding;Myb_DNA-bind_6	Myb-like DNA-binding domain;Myb-like DNA-binding domain
AT4G27654		At4g27654 [Source:UniProtKB/TrEMBL;Acc:Q3E9V5]	7.36	2.87964	0.000351961	0.00158967	yes	up	0.54	0.7	0.18	4.39	5.04	3.02	0.473333	4.15	GO:0008150;GO:0071456;GO:0016021;GO:001602	BP:biological_process;BP:cellular response to hypoxia;CC:integral component of membrane;CC:membrane;	------	------	------	------	ENOG411058I;ENOG4111C9K	S:Function unknown;	NP_567783.1	transmembrane protein [Arabidopsis thaliana]	------	------	------	------	------
AT1G51915		Cryptdin protein-like protein [Source:UniProtKB/TrEMBL;Acc:Q8L9S8]	7.251	2.85814	0.000327053	0.00149096	yes	up	0.75	0.35	0.37	1.04	9.87	1.08	0.49	3.99667	GO:0008150;GO:001602	BP:biological_process;CC:integral component of membrane;	------	------	------	------	ENOG41107MY	S:Function unknown	ABK28437.1	unknown, partial [Arabidopsis thaliana]	------	------	------	------	------
AT1G72920		Similar to part of disease resistance protein [Source:UniProtKB/TrEMBL;Acc:Q9SSN4]	7.206	2.84918	2.04538e-07	1.8169e-06	yes	up	4.1	6.29	13.81	80.07	54.44	72.05	8.06667	68.8533	GO:0009611;GO:0007165;GO:0071456;GO:0016021;GO:0005789;GO:0005515;GO:0003924;GO:0043531;GO:000552	BP:response to wounding;BP:signal transduction;BP:cellular response to hypoxia;CC:integral component of membrane;CC:endoplasmic reticulum membrane;MF:protein binding;MF:GTPase activity;MF:ADP binding;MF:GTP binding;	------	------	------	------	------	------	NP_177435.1	Toll-Interleukin-Resistance (TIR) domain family protein [Arabidopsis thaliana]	sp|Q9SSN3|TIR_ARATH;	Toll/interleukin-1 receptor-like protein OS=Arabidopsis thaliana OX=3702 GN=TIR PE=1 SV=1;	PF01582.21;PF13676.7	TIR;TIR_2	TIR domain;TIR domain
AT1G02970	WEE1	Wee1-like protein kinase [Source:UniProtKB/Swiss-Prot;Acc:Q8L4H0]	7.198	2.84762	3.27011e-06	2.33761e-05	yes	up	0.11	0.16	0.12	1.35	1.29	0.89	0.13	1.17667	GO:0006468;GO:0000076;GO:0051301;GO:0007049;GO:0016310;GO:0018108;GO:0007050;GO:0007093;GO:0005634;GO:0016301;GO:0016740;GO:0000166;GO:0004674;GO:0004714;GO:0004715;GO:0004713;GO:0005515;GO:0004672;GO:0046872;GO:000552	BP:protein phosphorylation;BP:DNA replication checkpoint;BP:cell division;BP:cell cycle;BP:phosphorylation;BP:peptidyl-tyrosine phosphorylation;BP:cell cycle arrest;BP:mitotic cell cycle checkpoint;CC:nucleus;MF:kinase activity;MF:transferase activity;MF:nucleotide binding;MF:protein serine/threonine kinase activity;MF:transmembrane receptor protein tyrosine kinase activity;MF:non-membrane spanni…	K06632	WEE1	------	------	ENOG410XS1M	S:Function unknown	AAF02869.1	Similar to Wee1 protein kinase [Arabidopsis thaliana]	sp|Q8L4H0|WEE1_ARATH;	Wee1-like protein kinase OS=Arabidopsis thaliana OX=3702 GN=WEE1 PE=1 SV=1;	PF00069.26;PF07714.18;PF14531.7	Pkinase;PK_Tyr_Ser-Thr;Kinase-like	Protein kinase domain;Protein tyrosine and serine/threonine kinase;Kinase-like
AT2G15220		At2g15220/F15A23.4 [Source:UniProtKB/TrEMBL;Acc:Q9SKL6]	7.164	2.84084	2.94774e-05	0.000172488	yes	up	2.01	1.25	2.57	7.37	31.87	12.15	1.94333	17.13	------	------	------	------	------	------	ENOG4111I5H	S:Function unknown	NP_565369.1	Plant basic secretory protein (BSP) family protein [Arabidopsis thaliana]	sp|C0HJG8|BSP_BOSSE;	Basic secretory protease;	PF04450.13	BSP	Peptidase of plants and bacteria
AT1G32350	AOX3	AOX1D [Source:UniProtKB/TrEMBL;Acc:A0A384LFI3]	7.133	2.83454	0.000473474	0.00207074	yes	up	1.45	1.56	2.05	6.82	31.65	5.41	1.68667	14.6267	GO:0010230;GO:0055114;GO:0016021;GO:0016020;GO:0005739;GO:0005743;GO:0070469;GO:0009916;GO:0102721;GO:0046872;GO:001649	BP:alternative respiration;BP:oxidation-reduction process;CC:integral component of membrane;CC:membrane;CC:mitochondrion;CC:mitochondrial inner membrane;CC:respiratory chain;MF:alternative oxidase activity;MF:ubiquino;MF:metal ion binding;MF:oxidoreductase activity;	K17893	AOX1, AOX2	------	------	ENOG410YFEH	S:Function unknown	NP_564395.1	alternative oxidase 1D [Arabidopsis thaliana]	sp|Q8LEE7|AOX3_ARATH;	Ubiquinol oxidase 3, mitochondrial OS=Arabidopsis thaliana OX=3702 GN=AOX3 PE=1 SV=2;	PF01786.18;PF03232.14	AOX;COQ7	Alternative oxidase;Ubiquinone biosynthesis protein COQ7
AT1G04680		Pectate lyase [Source:UniProtKB/TrEMBL;Acc:A0A178W464]	7.11	2.82991	2.44036e-30	2.27919e-28	yes	up	3.11	2	1.27	21.04	15.38	19.25	2.12667	18.5567	GO:0045490;GO:0030570;GO:0016829;GO:004687	BP:pectin catabolic process;MF:pectate lyase activity;MF:lyase activity;MF:metal ion binding;	K01728	pel	map00040	Pentose and glucuronate interconversions	COG3866	S:Function unknown	NP_563715.1	Pectin lyase-like superfamily protein [Arabidopsis thaliana]	sp|Q940Q1|PLY1_ARATH;	Probable pectate lyase 1 OS=Arabidopsis thaliana OX=3702 GN=At1g04680 PE=2 SV=2;	PF00544.20;PF13229.7	Pectate_lyase_4;Beta_helix	Pectate lyase;Right handed beta helix region
AT5G03760	CSLA9	Glucomannan 4-beta-mannosyltransferase 9 [Source:UniProtKB/Swiss-Prot;Acc:Q9LZR3]	7.075	2.82264	9.61036e-08	9.00306e-07	yes	up	2.58	0.89	0.82	14.95	10.04	11.92	1.43	12.3033	GO:0009617;GO:0071555;GO:0097502;GO:0009294;GO:0005794;GO:0016021;GO:0016020;GO:0000139;GO:0047259;GO:0016740;GO:0051753;GO:001675	BP:response to bacterium;BP:cell wall organization;BP:mannosylation;BP:DNA mediated transformation;CC:Golgi apparatus;CC:integral component of membrane;CC:membrane;CC:Golgi membrane;MF:glucomannan 4-beta-mannosyltransferase activity;MF:transferase activity;MF:mannan synthase activity;MF:transferase activity, transferring glycosyl groups;	K13680	CSLA	------	------	COG1215	S:Function unknown	NP_195996.1	Nucleotide-diphospho-sugar transferases superfamily protein [Arabidopsis thaliana]	sp|Q9LZR3|CSLA9_ARATH;	Glucomannan 4-beta-mannosyltransferase 9 OS=Arabidopsis thaliana OX=3702 GN=CSLA9 PE=1 SV=1;	PF13641.7;PF13632.7;PF00535.27	Glyco_tranf_2_3;Glyco_trans_2_3;Glycos_transf_2	Glycosyltransferase like family 2;Glycosyl transferase family group 2;Glycosyl transferase family 2
AT5G63450	CYP94B1	cytochrome P450, family 94, subfamily B, polypeptide 1 [Source:TAIR;Acc:AT5G63450]	7.055	2.81859	2.23057e-07	1.97425e-06	yes	up	0.39	0.2	0.41	1.29	2.45	5	0.333333	2.91333	GO:0009611;GO:0009694;GO:0055114;GO:0016020;GO:0016021;GO:0004497;GO:0052694;GO:0020037;GO:0016705;GO:000550	BP:response to wounding;BP:jasmonic acid metabolic process;BP:oxidation-reduction process;CC:membrane;CC:integral component of membrane;MF:monooxygenase activity;MF:jasmonoyl-isoleucine-12-hydroxylase activity;MF:heme binding;MF:oxidoreductase activity, acting on paired donors, with incorporation or reduction of molecular oxygen;MF:iron ion binding;	K20665	CYP94B	------	------	COG2124	S:Function unknown	NP_001331365.1	cytochrome P450, family 94, subfamily B, polypeptide 1 [Arabidopsis thaliana]	sp|Q9FMV7|C94B1_ARATH;	Cytochrome P450 94B1 OS=Arabidopsis thaliana OX=3702 GN=CYP94B1 PE=1 SV=1;	PF00067.23	p450	Cytochrome P450
AT5G24110	WRKY30	Probable WRKY transcription factor 30 [Source:UniProtKB/Swiss-Prot;Acc:Q9FL62]	7.051	2.81789	2.7989e-06	2.03463e-05	yes	up	0.23	0.87	0.42	2.09	8.31	2.92	0.506667	4.44	GO:0010150;GO:0009751;GO:0010193;GO:0042542;GO:0006355;GO:0005737;GO:0005634;GO:0003700;GO:0043565;GO:0044212;GO:0000976;GO:0005515;GO:000367	BP:leaf senescence;BP:response to salicylic acid;BP:response to ozone;BP:response to hydrogen peroxide;BP:regulation of transcription, DNA-templated;CC:cytoplasm;CC:nucleus;MF:transcription factor activity, sequence-specific DNA binding;MF:sequence-specific DNA binding;MF:transcription regulatory region DNA binding;MF:transcription regulatory region sequence-specific DNA binding;MF:protein bindin…	------	------	------	------	ENOG410YZU1	T:Signal transduction mechanisms	NP_568439.1	WRKY DNA-binding protein 30 [Arabidopsis thaliana]	sp|Q9FL62|WRK30_ARATH;	Probable WRKY transcription factor 30 OS=Arabidopsis thaliana OX=3702 GN=WRKY30 PE=1 SV=1;	PF03106.16	WRKY	WRKY DNA -binding domain
AT4G28940		Phosphorylase superfamily protein [Source:UniProtKB/TrEMBL;Acc:F4JM51]	7.02	2.81148	0.00796893	0.0245808	yes	up	0.16	0	0.12	0.44	1.41	0.58	0.0933333	0.81	GO:0009116;GO:000382	BP:nucleoside metabolic process;MF:catalytic activity;	------	------	------	------	COG0775	F:Nucleotide transport and metabolism	NP_194623.2	Phosphorylase superfamily protein [Arabidopsis thaliana]	sp|Q07469|BSPA_POPDE;	Bark storage protein A OS=Populus deltoides OX=3696 GN=BSPA PE=2 SV=1;	PF01048.21	PNP_UDP_1	Phosphorylase superfamily
AT4G14690	ELIP2	Early light-induced protein 2, chloroplastic [Source:UniProtKB/Swiss-Prot;Acc:Q94K66]	7.016	2.81071	0.0122674	0.0355671	yes	up	0.14	0.07	0.15	2.12	0.49	0.43	0.12	1.01333	GO:0071490;GO:0071492;GO:0071491;GO:0071486;GO:0010218;GO:0034605;GO:0010380;GO:0071483;GO:0010114;GO:0010117;GO:0010224;GO:0015979;GO:0010030;GO:0009535;GO:0009579;GO:0009536;GO:0009522;GO:0009523;GO:0016021;GO:0016020;GO:000950	BP:cellular response to far red light;BP:cellular response to UV-A;BP:cellular response to red light;BP:cellular response to high light intensity;BP:response to far red light;BP:cellular response to heat;BP:regulation of chlorophyll biosynthetic process;BP:cellular response to blue light;BP:response to red light;BP:photoprotection;BP:response to UV-B;BP:photosynthesis;BP:positive regulation of se…	------	------	------	------	ENOG410Y0RG	S:Function unknown	NP_567438.1	Chlorophyll A-B binding family protein [Arabidopsis thaliana]	sp|Q94K66|ELIP2_ARATH;	Early light-induced protein 2, chloroplastic OS=Arabidopsis thaliana OX=3702 GN=ELIP2 PE=1 SV=1;	PF00504.22	Chloroa_b-bind	Chlorophyll A-B binding protein
AT5G07030		Eukaryotic aspartyl protease family protein [Source:UniProtKB/TrEMBL;Acc:F4K5B9]	6.987	2.80472	1.78992e-43	3.40259e-41	yes	up	1.84	1.78	1.17	13.19	14.59	13.56	1.59667	13.78	GO:0030163;GO:0006508;GO:0005618;GO:0016787;GO:0004190;GO:0003677;GO:000823	BP:protein catabolic process;BP:proteolysis;CC:cell wall;MF:hydrolase activity;MF:aspartic-type endopeptidase activity;MF:DNA binding;MF:peptidase activity;	------	------	------	------	ENOG410XNV7	S:Function unknown	NP_196320.2	Eukaryotic aspartyl protease family protein [Arabidopsis thaliana]	sp|O04496|AED3_ARATH;	Aspartyl protease AED3 OS=Arabidopsis thaliana OX=3702 GN=AED3 PE=1 SV=1;	PF14543.7;PF14541.7;PF00026.24	TAXi_N;TAXi_C;Asp	Xylanase inhibitor N-terminal;Xylanase inhibitor C-terminal;Eukaryotic aspartyl protease
AT1G04040		At1g04040/F21M11_2 [Source:UniProtKB/TrEMBL;Acc:Q9ZWC4]	6.954	2.79781	1.63362e-30	1.55963e-28	yes	up	10.18	9.95	5.03	91.84	53.27	68.54	8.38667	71.2167	GO:0016311;GO:0005618;GO:0005774;GO:0005773;GO:0005576;GO:0009506;GO:0009505;GO:0045735;GO:000399	BP:dephosphorylation;CC:cell wall;CC:vacuolar membrane;CC:vacuole;CC:extracellular region;CC:plasmodesma;CC:plant-type cell wall;MF:nutrient reservoir activity;MF:acid phosphatase activity;	------	------	------	------	ENOG410Y9AU	S:Function unknown	NP_563698.1	HAD superfamily, subfamily IIIB acid phosphatase [Arabidopsis thaliana]	sp|P27061|PPA1_SOLLC;	Acid phosphatase 1 OS=Solanum lycopersicum OX=4081 GN=APS1 PE=2 SV=1;	PF03767.15	Acid_phosphat_B	HAD superfamily, subfamily IIIB
AT3G52370	FLA15	FASCICLIN-like arabinogalactan protein 15 [Source:UniProtKB/TrEMBL;Acc:A0A1I9LLN6]	6.907	2.78804	2.4605e-10	3.44999e-09	yes	up	0.28	0.23	0.34	2.84	2.17	2.2	0.283333	2.40333	GO:0016021;GO:000557	CC:integral component of membrane;CC:extracellular region;	------	------	------	------	COG2335	M:Cell wall/membrane/envelope biogenesis	NP_001325578.1	FASCICLIN-like arabinogalactan protein 15 precursor [Arabidopsis thaliana]	sp|Q9FT45|FLA15_ARATH;	Fasciclin-like arabinogalactan protein 15 OS=Arabidopsis thaliana OX=3702 GN=FLA15 PE=2 SV=1;	PF02469.23	Fasciclin	Fasciclin domain
AT3G50060	MYB77	Transcription factor MYB77 [Source:UniProtKB/Swiss-Prot;Acc:Q9SN12]	6.906	2.78795	6.63355e-07	5.42839e-06	yes	up	3.92	3.71	8.9	51.61	26.16	63.04	5.51	46.9367	GO:0010929;GO:0010200;GO:0006355;GO:0006357;GO:0048527;GO:0005634;GO:0044212;GO:0003700;GO:0000976;GO:0005515;GO:0003677;GO:0000978;GO:000098	BP:positive regulation of auxin mediated signaling pathway;BP:response to chitin;BP:regulation of transcription, DNA-templated;BP:regulation of transcription from RNA polymerase II promoter;BP:lateral root development;CC:nucleus;MF:transcription regulatory region DNA binding;MF:transcription factor activity, sequence-specific DNA binding;MF:transcription regulatory region sequence-specific DNA bi…	K09422	MYBP	------	------	COG5147	O:Posttranslational modification, protein turnover, chaperones	NP_190575.1	myb domain protein 77 [Arabidopsis thaliana]	sp|Q9SN12|MYB77_ARATH;	Transcription factor MYB77 OS=Arabidopsis thaliana OX=3702 GN=MYB77 PE=1 SV=1;	PF00249.32;PF13921.7	Myb_DNA-binding;Myb_DNA-bind_6	Myb-like DNA-binding domain;Myb-like DNA-binding domain
AT1G57650		ATP binding protein [Source:UniProtKB/TrEMBL;Acc:F4I847]	6.85	2.77618	0.000126872	0.000642315	yes	up	0.09	0.15	0.04	0.14	1.21	0.21	0.0933333	0.52	GO:0006952;GO:0007165;GO:0006412;GO:0005840;GO:0016787;GO:0003735;GO:0050135;GO:0043531;GO:0003953;GO:006180	BP:defense response;BP:signal transduction;BP:translation;CC:ribosome;MF:hydrolase activity;MF:structural constituent of ribosome;MF:NA;MF:ADP binding;MF:NAD+ nucleosidase activity;MF:NAD+ nucleotidase, cyclic ADP-ribose generating;	------	------	------	------	ENOG410ZSQ7;ENOG410XYF5;COG4886	S:Function unknown;	NP_176078.4	ATP binding protein [Arabidopsis thaliana]	sp|Q9FI14|TAO1_ARATH;	Disease resistance protein TAO1 OS=Arabidopsis thaliana OX=3702 GN=TAO1 PE=3 SV=1;	PF07725.13	LRR_3	Leucine Rich Repeat
AT5G47220	ERF2	ERF2 [Source:UniProtKB/TrEMBL;Acc:A0A178UCP3]	6.839	2.77384	1.98219e-15	5.06897e-14	yes	up	16.07	16.83	32.99	187.17	193.23	174.05	21.9633	184.817	GO:0010200;GO:0009873;GO:0009864;GO:0006952;GO:0006355;GO:0010087;GO:0045893;GO:0051301;GO:0005634;GO:0044212;GO:0003700;GO:0000976;GO:000367	BP:response to chitin;BP:ethylene-activated signaling pathway;BP:induced systemic resistance, jasmonic acid mediated signaling pathway;BP:defense response;BP:regulation of transcription, DNA-templated;BP:phloem or xylem histogenesis;BP:positive regulation of transcription, DNA-templated;BP:cell division;CC:nucleus;MF:transcription regulatory region DNA binding;MF:transcription factor activity, se…	K14517	ERF2	map04075	Plant hormone signal transduction	ENOG410YRS5	K:Transcription	NP_199533.1	ethylene responsive element binding factor 2 [Arabidopsis thaliana]	sp|O80338|EF101_ARATH;	Ethylene-responsive transcription factor 2 OS=Arabidopsis thaliana OX=3702 GN=ERF2 PE=2 SV=1;	PF00847.21	AP2	AP2 domain
AT2G28500	LBD11	LOB domain-containing protein 11 [Source:UniProtKB/Swiss-Prot;Acc:Q9SK08]	6.799	2.76525	0.0156648	0.0436951	yes	up	0.05	0.05	0.1	0.33	0.5	0.8	0.0666667	0.543333	GO:000815	BP:biological_process;	------	------	------	------	ENOG410YHTF	S:Function unknown	NP_180417.2	LOB domain-containing protein 11 [Arabidopsis thaliana]	sp|Q9SK08|LBD11_ARATH;	LOB domain-containing protein 11 OS=Arabidopsis thaliana OX=3702 GN=LBD11 PE=2 SV=2;	PF03195.15	LOB	Lateral organ boundaries
AT5G57510		Cotton fiber protein [Source:UniProtKB/TrEMBL;Acc:Q9FKM0]	6.77	2.75912	2.45711e-05	0.000146574	yes	up	0.95	1.09	0.86	4.95	17.04	2.15	0.966667	8.04667	GO:007145	BP:cellular response to hypoxia;	------	------	------	------	ENOG410Z7H4	S:Function unknown	ABK28297.1	unknown, partial [Arabidopsis thaliana]	------	------	PF05553.12	DUF761	Cotton fibre expressed protein
AT1G78990		HXXXD-type acyl-transferase family protein [Source:UniProtKB/TrEMBL;Acc:F4IDH0]	6.746	2.754	1.83447e-10	2.6341e-09	yes	up	0.37	0.84	1.52	7.65	10.92	4.48	0.91	7.68333	GO:0016740;GO:001674	MF:transferase activity;MF:transferase activity, transferring acyl groups other than amino-acyl groups;	------	------	------	------	ENOG410YESS	S:Function unknown	AAC17079.1	Contains similarity to C2-HC type zinc finger protein C.e-MyT1 gb|U67079 from C. elegans and to hypersensitivity-related gene 201 isolog T28M21.14 from A. thaliana BAC gb|AF002109 [Arabidopsis thaliana]	sp|Q9FI78|HST_ARATH;	Shikimate O-hydroxycinnamoyltransferase OS=Arabidopsis thaliana OX=3702 GN=HST PE=1 SV=1;	PF02458.16	Transferase	Transferase family
AT1G11545	XTH8	Xyloglucan endotransglucosylase/hydrolase [Source:UniProtKB/TrEMBL;Acc:A0A178W0W2]	6.737	2.75203	2.90122e-27	2.20997e-25	yes	up	3.41	1.97	1.52	20.21	16.42	19.71	2.3	18.78	GO:0042546;GO:0005975;GO:0006073;GO:0071555;GO:0008152;GO:0010411;GO:0005618;GO:0048046;GO:0005576;GO:0016787;GO:0016798;GO:0016762;GO:0016740;GO:000455	BP:cell wall biogenesis;BP:carbohydrate metabolic process;BP:cellular glucan metabolic process;BP:cell wall organization;BP:metabolic process;BP:xyloglucan metabolic process;CC:cell wall;CC:apoplast;CC:extracellular region;MF:hydrolase activity;MF:hydrolase activity, acting on glycosyl bonds;MF:xylogluca;MF:transferase activity;MF:hydrolase activity, hydrolyzing O-glycosyl compounds;	K08235	E2.4.1.207	------	------	ENOG410YAVH	G:Carbohydrate transport and metabolism	NP_563892.1	xyloglucan endotransglucosylase/hydrolase 8 [Arabidopsis thaliana]	sp|Q8L9A9|XTH8_ARATH;	Probable xyloglucan endotransglucosylase/hydrolase protein 8 OS=Arabidopsis thaliana OX=3702 GN=XTH8 PE=2 SV=2;	PF00722.22;PF06955.13	Glyco_hydro_16;XET_C	Glycosyl hydrolases family 16;Xyloglucan endo-transglycosylase
AT1G74930	ERF018	Ethylene-responsive transcription factor ERF018 [Source:UniProtKB/Swiss-Prot;Acc:Q9S7L5]	6.712	2.74671	5.17779e-05	0.000286956	yes	up	4.81	10.72	25.24	123.63	133.79	81.16	13.59	112.86	GO:0009873;GO:0009611;GO:0010087;GO:0006355;GO:0002213;GO:0051301;GO:0005634;GO:0044212;GO:0003700;GO:0000976;GO:000367	BP:ethylene-activated signaling pathway;BP:response to wounding;BP:phloem or xylem histogenesis;BP:regulation of transcription, DNA-templated;BP:defense response to insect;BP:cell division;CC:nucleus;MF:transcription regulatory region DNA binding;MF:transcription factor activity, sequence-specific DNA binding;MF:transcription regulatory region sequence-specific DNA binding;MF:DNA binding;	------	------	------	------	ENOG410YNX4	K:Transcription	NP_177631.1	Integrase-type DNA-binding superfamily protein [Arabidopsis thaliana]	sp|Q9S7L5|ERF18_ARATH;	Ethylene-responsive transcription factor ERF018 OS=Arabidopsis thaliana OX=3702 GN=ERF018 PE=2 SV=1;	PF00847.21	AP2	AP2 domain
AT1G45201	ATTLL1	triacylglycerol lipase-like 1 [Source:TAIR;Acc:AT1G45201]	6.69	2.74198	2.58959e-09	3.14277e-08	yes	up	9.41	3.92	3.3	51.88	45.11	38.26	5.54333	45.0833	GO:0006629;GO:0099503;GO:0005773;GO:0005634;GO:0016020;GO:001602	BP:lipid metabolic process;CC:secretory vesicle;CC:vacuole;CC:nucleus;CC:membrane;CC:integral component of membrane;	------	------	------	------	ENOG4111WA2	S:Function unknown	NP_001323068.1	triacylglycerol lipase-like 1 [Arabidopsis thaliana]	sp|F4JFU8|OBL1_ARATH;	Triacylglycerol lipase OBL1 OS=Arabidopsis thaliana OX=3702 GN=OBL1 PE=1 SV=1;	PF01764.26;PF11187.9	Lipase_3;DUF2974	Lipase;Protein of unknown function
AT4G11070	WRKY41	Probable WRKY transcription factor 41 [Source:UniProtKB/Swiss-Prot;Acc:Q8H0Y8]	6.676	2.73897	0.00605668	0.0194213	yes	up	0.23	0.12	0.11	0.54	2.97	0.51	0.153333	1.34	GO:0006355;GO:0005634;GO:0043565;GO:0044212;GO:0003700;GO:0000976;GO:0005515;GO:000367	BP:regulation of transcription, DNA-templated;CC:nucleus;MF:sequence-specific DNA binding;MF:transcription regulatory region DNA binding;MF:transcription factor activity, sequence-specific DNA binding;MF:transcription regulatory region sequence-specific DNA binding;MF:protein binding;MF:DNA binding;	------	------	------	------	ENOG410YZU1	K:Transcription	NP_192845.1	WRKY family transcription factor [Arabidopsis thaliana]	sp|Q8H0Y8|WRK41_ARATH;	Probable WRKY transcription factor 41 OS=Arabidopsis thaliana OX=3702 GN=WRKY41 PE=2 SV=2;	PF03106.16	WRKY	WRKY DNA -binding domain
AT5G39100	GLP6	germin-like protein 6 [Source:TAIR;Acc:AT5G39100]	6.661	2.73563	0.0165581	0.0456943	yes	up	0	0.16	0.43	0.4	3.73	0.76	0.196667	1.63	GO:0048046;GO:0005618;GO:0030145;GO:004573	CC:apoplast;CC:cell wall;MF:manganese ion binding;MF:nutrient reservoir activity;	------	------	------	------	ENOG410YERY	S:Function unknown	P92997.2;	;Flags: Precursor [Arabidopsis thaliana]	sp|P92997|GL113_ARATH;	Germin-like protein subfamily 1 member 13 OS=Arabidopsis thaliana OX=3702 GN=GLP6 PE=2 SV=2;	------	------	------
AT1G24140	3MMP	Metalloendoproteinase 3-MMP [Source:UniProtKB/Swiss-Prot;Acc:Q5XF51]	6.65	2.73339	2.56441e-13	5.11952e-12	yes	up	0.71	0.65	1.13	4.85	10.55	5.01	0.83	6.80333	GO:0030574;GO:0030198;GO:0006508;GO:0016020;GO:0031012;GO:0005886;GO:0031225;GO:0016787;GO:0004222;GO:0008270;GO:0008233;GO:0046872;GO:000823	BP:collagen catabolic process;BP:extracellular matrix organization;BP:proteolysis;CC:membrane;CC:extracellular matrix;CC:plasma membrane;CC:anchored component of membrane;MF:hydrolase activity;MF:metalloendopeptidase activity;MF:zinc ion binding;MF:peptidase activity;MF:metal ion binding;MF:metallopeptidase activity;	------	------	------	------	ENOG410XQ5D	O:Posttranslational modification, protein turnover, chaperones	NP_173824.2	Matrixin family protein [Arabidopsis thaliana]	sp|Q5XF51|3MMP_ARATH;	Metalloendoproteinase 3-MMP OS=Arabidopsis thaliana OX=3702 GN=3MMP PE=1 SV=1;	PF00413.25;PF01471.19	Peptidase_M10;PG_binding_1	Matrixin;Putative peptidoglycan binding domain
AT1G11185		other RNA [Source:TAIR;Acc:AT1G11185]	6.644	2.73202	1.45143e-12	2.65798e-11	yes	up	2.93	5.5	2.94	24.63	22.44	41.7	3.79	29.59	GO:000388	MF:DNA-directed DNA polymerase activity;	------	------	------	------	ENOG41113CT	S:Function unknown	ABK28006.1	unknown, partial [Arabidopsis thaliana]	------	------	------	------	------
AT5G35525	PCR3	Protein PLANT CADMIUM RESISTANCE 3 [Source:UniProtKB/Swiss-Prot;Acc:P0CW97]	6.638	2.73078	9.66915e-06	6.31124e-05	yes	up	0.2	0.47	0.9	4.46	3.45	4.53	0.523333	4.14667	GO:0006979;GO:0005773;GO:0016021;GO:0016020;GO:0005576;GO:000588	BP:response to oxidative stress;CC:vacuole;CC:integral component of membrane;CC:membrane;CC:extracellular region;CC:plasma membrane;	------	------	------	------	ENOG410XUTP	S:Function unknown	NP_680337.2	PLAC8 family protein [Arabidopsis thaliana]	sp|P0CW97|PCR3_ARATH;	Protein PLANT CADMIUM RESISTANCE 3 OS=Arabidopsis thaliana OX=3702 GN=PCR3 PE=3 SV=1;	PF04749.18	PLAC8	PLAC8 family
AT1G07520		GRAS family transcription factor [Source:TAIR;Acc:AT1G07520]	6.615	2.72582	2.08193e-23	1.2022e-21	yes	up	0.68	1.06	2.11	11.18	11.22	10.46	1.28333	10.9533	GO:0010200;GO:0006355;GO:0009410;GO:0045893;GO:0080183;GO:0005829;GO:0005634;GO:0043565;GO:0044212;GO:000370	BP:response to chitin;BP:regulation of transcription, DNA-templated;BP:response to xenobiotic stimulus;BP:positive regulation of transcription, DNA-templated;BP:response to photooxidative stress;CC:cytosol;CC:nucleus;MF:sequence-specific DNA binding;MF:transcription regulatory region DNA binding;MF:transcription factor activity, sequence-specific DNA binding;	------	------	------	------	ENOG41104MH;ENOG410YMPH	K:Transcription;	AAF79548.1	F22G5.9 [Arabidopsis thaliana]	sp|Q3EDH0|SCL31_ARATH;	Scarecrow-like protein 31 OS=Arabidopsis thaliana OX=3702 GN=SCL31 PE=2 SV=3;	PF03514.15	GRAS	GRAS domain family
AT5G44990		Glutathione S-transferase family protein [Source:UniProtKB/TrEMBL;Acc:Q9FL98]	6.604	2.72338	0.00264435	0.00947196	yes	up	0.13	0.46	0.05	0.62	4.18	0.69	0.213333	1.83	GO:0007165;GO:0006749;GO:0005737;GO:0016021;GO:0016020;GO:0004364;GO:0005515;GO:001674	BP:signal transduction;BP:glutathione metabolic process;CC:cytoplasm;CC:integral component of membrane;CC:membrane;MF:glutathione transferase activity;MF:protein binding;MF:transferase activity;	K07393	ECM4, yqjG	------	------	COG0435	O:Posttranslational modification, protein turnover, chaperones	ABK28743.1	unknown, partial [Arabidopsis thaliana]	sp|P42620|YQJG_ECOLI;	Glutathionyl-hydroquinone reductase YqjG OS=Escherichia coli;	PF13409.7;PF13410.7;PF00043.26	GST_N_2;GST_C_2;GST_C	Glutathione S-transferase, N-terminal domain;Glutathione S-transferase, C-terminal domain;Glutathione S-transferase, C-terminal domain
AT4G11170		Putative disease resistance protein At4g11170 [Source:UniProtKB/Swiss-Prot;Acc:O82500]	6.599	2.72235	0.000717288	0.00300352	yes	up	0.36	0.41	0.53	1.72	7.65	1.34	0.433333	3.57	GO:0006952;GO:0007165;GO:0010193;GO:0009507;GO:0005829;GO:0005739;GO:0016787;GO:0005515;GO:0050135;GO:0003953;GO:0043022;GO:0043531;GO:0061809;GO:000374	BP:defense response;BP:signal transduction;BP:response to ozone;CC:chloroplast;CC:cytosol;CC:mitochondrion;MF:hydrolase activity;MF:protein binding;MF:NA;MF:NAD+ nucleosidase activity;MF:ribosome binding;MF:ADP binding;MF:NAD+ nucleotidase, cyclic ADP-ribose generating;MF:translation initiation factor activity;	------	------	------	------	ENOG41106B0;COG4886;ENOG410YG57	Z:Cytoskeleton;S:Function unknown	NP_192855.1	Disease resistance protein (TIR-NBS-LRR class) family [Arabidopsis thaliana]	sp|O82500|Y4117_ARATH;	Putative disease resistance protein At4g11170 OS=Arabidopsis thaliana OX=3702 GN=At4g11170 PE=2 SV=1;	PF01582.21;PF00931.23;PF13676.7;PF07725.13;PF13401.7;PF13191.7;PF00004.30;PF13173.7;PF01637.19;PF13238.7	TIR;NB-ARC;TIR_2;LRR_3;AAA_22;AAA_16;AAA;AAA_14;ATPase_2;AAA_18	TIR domain;NB-ARC domain;TIR domain;Leucine Rich Repeat;AAA domain;AAA ATPase domain;ATPase family associated with various cellular activities;AAA domain;ATPase domain predominantly from Archaea;AAA domain
AT1G50745		Plant mobile domain protein [Source:UniProtKB/TrEMBL;Acc:A0A1P8AP45]	6.572	2.71623	0.00450153	0.0150258	yes	up	0.04	0.1	0.09	0.8	0.55	0.35	0.0766667	0.566667	GO:000848	MF:transaminase activity;	------	------	------	------	ENOG410YCGI	S:Function unknown	NP_001320844.1	plant mobile domain protein [Arabidopsis thaliana]	------	------	------	------	------
AT4G39940	APK2	Adenylyl-sulfate kinase 2, chloroplastic [Source:UniProtKB/Swiss-Prot;Acc:O49196]	6.53	2.7071	1.77239e-54	5.85733e-52	yes	up	20.57	14.16	16.15	107.36	174.24	125.23	16.96	135.61	GO:0008652;GO:0016310;GO:0070814;GO:0019344;GO:0000103;GO:0009536;GO:0009507;GO:0016301;GO:0004020;GO:0000166;GO:0016740;GO:000552	BP:cellular amino acid biosynthetic process;BP:phosphorylation;BP:hydrogen sulfide biosynthetic process;BP:cysteine biosynthetic process;BP:sulfate assimilation;CC:plastid;CC:chloroplast;MF:kinase activity;MF:adenylylsulfate kinase activity;MF:nucleotide binding;MF:transferase activity;MF:ATP binding;	K00860	cysC	map00230;map00920	Purine metabolism;Sulfur metabolism	COG0529	G:Carbohydrate transport and metabolism	NP_195704.1	APS-kinase 2 [Arabidopsis thaliana]	sp|O49196|APK2_ARATH;	Adenylyl-sulfate kinase 2, chloroplastic OS=Arabidopsis thaliana OX=3702 GN=APK2 PE=1 SV=1;	PF01583.21;PF13671.7;PF13238.7;PF01656.24;PF13555.7	APS_kinase;AAA_33;AAA_18;CbiA;AAA_29	Adenylylsulphate kinase;AAA domain;AAA domain;CobQ/CobB/MinD/ParA nucleotide binding domain;P-loop containing region of AAA domain
AT2G44930		Expressed protein [Source:UniProtKB/TrEMBL;Acc:O22159]	6.525	2.70597	0.0165393	0.0456601	yes	up	0.03	0.06	0.03	0.37	0.27	0.31	0.04	0.316667	GO:0016021;GO:0016020;GO:000367	CC:integral component of membrane;CC:membrane;MF:molecular_function;	------	------	------	------	ENOG4111CHW	S:Function unknown	NP_566032.1	transmembrane protein, putative (DUF247) [Arabidopsis thaliana]	sp|Q9SD53|Y3720_ARATH;	UPF0481 protein At3g47200 OS=Arabidopsis thaliana OX=3702 GN=At3g47200 PE=2 SV=1;	PF03140.16	DUF247	Plant protein of unknown function
AT3G03780	MS2	5-methyltetrahydropteroyltriglutamate--homocysteine methyltransferase 2 [Source:UniProtKB/Swiss-Prot;Acc:Q9SRV5]	6.477	2.69542	1.62429e-45	3.32299e-43	yes	up	3.15	2.14	2.88	24.27	25.07	16.08	2.72333	21.8067	GO:0008652;GO:0009086;GO:0032259;GO:0046686;GO:0005737;GO:0009941;GO:0005829;GO:0048046;GO:0005576;GO:0009507;GO:0005886;GO:0009506;GO:0046872;GO:0016740;GO:0008705;GO:0008270;GO:0008168;GO:0003871;GO:000372	BP:cellular amino acid biosynthetic process;BP:methionine biosynthetic process;BP:methylation;BP:response to cadmium ion;CC:cytoplasm;CC:chloroplast envelope;CC:cytosol;CC:apoplast;CC:extracellular region;CC:chloroplast;CC:plasma membrane;CC:plasmodesma;MF:metal ion binding;MF:transferase activity;MF:methionine synthase activity;MF:zinc ion binding;MF:methyltransferase activity;MF:5-methyltetrahy…	K00549	metE	map00450;map00270	Selenocompound metabolism;Cysteine and methionine metabolism	COG0620	E:Amino acid transport and metabolism	NP_001118564.1	methionine synthase 2 [Arabidopsis thaliana]	sp|Q9SRV5|METE2_ARATH;	5-methyltetrahydropteroyltriglutamate--homocysteine methyltransferase 2 OS=Arabidopsis thaliana OX=3702 GN=MS2 PE=1 SV=1;	PF01717.19;PF08267.13	Meth_synt_2;Meth_synt_1	Cobalamin-independent synthase, Catalytic domain;Cobalamin-independent synthase, N-terminal domain
AT1G35260	MLP165	MLP-like protein 165 [Source:UniProtKB/Swiss-Prot;Acc:Q9C7I7]	6.469	2.69356	9.31934e-09	1.04157e-07	yes	up	0.73	1.5	0.84	7.5	5.57	10.96	1.02333	8.01	GO:000695	BP:defense response;	------	------	------	------	------	------	NP_564456.1	MLP-like protein 165 [Arabidopsis thaliana]	sp|Q9C7I7|ML165_ARATH;	MLP-like protein 165 OS=Arabidopsis thaliana OX=3702 GN=MLP165 PE=2 SV=1;	PF00407.20	Bet_v_1	Pathogenesis-related protein Bet v 1 family
AT2G46640		unknown protein; Ha. [Source:TAIR;Acc:AT2G46640]	6.467	2.69316	3.23879e-26	2.31138e-24	yes	up	1.89	2.02	1.23	12.95	12.41	14.98	1.71333	13.4467	GO:0001763;GO:0060771;GO:001602	BP:morphogenesis of a branching structure;BP:phyllotactic patterning;CC:integral component of membrane;	------	------	------	------	ENOG41113D4	S:Function unknown	NP_001323850.1	NAD-dependent protein deacetylase HST1-like protein [Arabidopsis thaliana]	------	------	------	------	------
AT5G25090	ENODL13	ENODL13 [Source:UniProtKB/TrEMBL;Acc:A0A178U9R8]	6.45	2.68921	3.42729e-08	3.46618e-07	yes	up	1.11	0.87	0.71	4.58	7.8	8.48	0.896667	6.95333	GO:0022900;GO:0009536;GO:0016020;GO:0046658;GO:0005886;GO:0031225;GO:0009506;GO:000905	BP:electron transport chain;CC:plastid;CC:membrane;CC:anchored component of plasma membrane;CC:plasma membrane;CC:anchored component of membrane;CC:plasmodesma;MF:electron carrier activity;	------	------	------	------	ENOG410YW92	S:Function unknown	NP_197891.1	early nodulin-like protein 13 [Arabidopsis thaliana]	sp|Q8LC95|ENL3_ARATH;	Early nodulin-like protein 3 OS=Arabidopsis thaliana OX=3702 GN=At5g25090 PE=2 SV=2;	PF02298.18	Cu_bind_like	Plastocyanin-like domain
AT3G02020	AK3	Aspartokinase 3, chloroplastic [Source:UniProtKB/Swiss-Prot;Acc:Q9S702]	6.433	2.68539	5.28544e-33	5.8524e-31	yes	up	2.63	1.58	1.36	11.64	19.06	13.54	1.85667	14.7467	GO:0008652;GO:0009090;GO:0009089;GO:0009088;GO:0016310;GO:0009451;GO:0005737;GO:0009536;GO:0043231;GO:0009570;GO:0009507;GO:0016715;GO:0016301;GO:0008270;GO:0000166;GO:0016740;GO:0004072;GO:000552	BP:cellular amino acid biosynthetic process;BP:homoserine biosynthetic process;BP:lysine biosynthetic process via diaminopimelate;BP:threonine biosynthetic process;BP:phosphorylation;BP:RNA modification;CC:cytoplasm;CC:plastid;CC:intracellular membrane-bounded organelle;CC:chloroplast stroma;CC:chloroplast;MF:oxidoreductase activity, acting on paired donors, with incorporation or reduction of mol…	------	------	------	------	ENOG410Z7Z7;COG0527	S:Function unknown;E:Amino acid transport and metabolism	NP_186850.1	Pentatricopeptide repeat (PPR) superfamily protein [Arabidopsis thaliana]	sp|Q9S7F4|PP206_ARATH;	Putative pentatricopeptide repeat-containing protein At2g01510 OS=Arabidopsis thaliana OX=3702 GN=PCMP-H36 PE=3 SV=1;	PF00696.29;PF01842.26;PF13840.7	AA_kinase;ACT;ACT_7	Amino acid kinase family;ACT domain;ACT domain
AT1G47890	AtRLP7	-	6.41	2.68043	2.96032e-07	2.57452e-06	yes	up	0.11	0.08	0.33	1.13	1.91	1.12	0.173333	1.38667	GO:0016021;GO:0016020;GO:0005886;GO:000551	CC:integral component of membrane;CC:membrane;CC:plasma membrane;MF:protein binding;	------	------	------	------	COG4886	K:Transcription	NP_175225.1	receptor like protein 7 [Arabidopsis thaliana]	sp|Q9C699|RLP7_ARATH;	Receptor-like protein 7 OS=Arabidopsis thaliana OX=3702 GN=RLP7 PE=3 SV=2;	PF13855.7;PF12799.8;PF08263.13	LRR_8;LRR_4;LRRNT_2	Leucine rich repeat;Leucine Rich repeats;Leucine rich repeat N-terminal domain
AT2G33130	RALFL18	Protein RALF-like 18 [Source:UniProtKB/Swiss-Prot;Acc:O49320]	6.405	2.6791	0.00994744	0.0296573	yes	up	0.22	0.43	0	1.06	2.76	1.3	0.216667	1.70667	GO:0019722;GO:0007267;GO:0048046;GO:0005576;GO:0009506;GO:000517	BP:calcium-mediated signaling;BP:cell-cell signaling;CC:apoplast;CC:extracellular region;CC:plasmodesma;MF:hormone activity;	------	------	------	------	ENOG411044X	U:Intracellular trafficking, secretion, and vesicular transport	NP_180872.1	ralf-like 18 [Arabidopsis thaliana]	sp|O49320|RLF18_ARATH;	Protein RALF-like 18 OS=Arabidopsis thaliana OX=3702 GN=RALFL18 PE=3 SV=1;	PF05498.12	RALF	Rapid ALkalinization Factor
AT2G47010		At2g47010/F14M4.16 [Source:UniProtKB/TrEMBL;Acc:Q944A3]	6.4	2.67811	3.01521e-13	5.97507e-12	yes	up	0.47	0.43	0.29	2.85	3.68	2.89	0.396667	3.14	GO:0016310;GO:001630	BP:phosphorylation;MF:kinase activity;	------	------	------	------	ENOG410YD8R	S:Function unknown	NP_566093.4	calcium/calcium/calmodulin-dependent Serine/Threonine-kinase [Arabidopsis thaliana]	------	------	------	------	------
AT5G55730	FLA1	Fasciclin-like arabinogalactan protein 1 [Source:UniProtKB/Swiss-Prot;Acc:Q9FM65]	6.383	2.6743	4.95604e-35	6.04891e-33	yes	up	2.96	1.95	1.65	19.68	15.4	16.53	2.18667	17.2033	GO:0048367;GO:0048364;GO:0009536;GO:0099503;GO:0005618;GO:0016020;GO:0048046;GO:0046658;GO:0005576;GO:0005886;GO:003122	BP:shoot system development;BP:root development;CC:plastid;CC:secretory vesicle;CC:cell wall;CC:membrane;CC:apoplast;CC:anchored component of plasma membrane;CC:extracellular region;CC:plasma membrane;CC:anchored component of membrane;	------	------	------	------	ENOG4111EHG	M:Cell wall/membrane/envelope biogenesis	NP_001190550.1	FASCICLIN-like arabinogalactan 1 [Arabidopsis thaliana]	sp|Q9FM65|FLA1_ARATH;	Fasciclin-like arabinogalactan protein 1 OS=Arabidopsis thaliana OX=3702 GN=FLA1 PE=1 SV=1;	PF02469.23	Fasciclin	Fasciclin domain
AT1G70170	2MMP	Metalloendoproteinase 2-MMP [Source:UniProtKB/Swiss-Prot;Acc:O04529]	6.378	2.67299	0.000460607	0.00201966	yes	up	0.12	0.26	0.9	1.03	7.44	1.57	0.426667	3.34667	GO:1900056;GO:0009753;GO:0009651;GO:0030574;GO:0080186;GO:0030198;GO:0046686;GO:0006508;GO:2000028;GO:0007275;GO:0016020;GO:0031012;GO:0005886;GO:0031225;GO:0016787;GO:0004222;GO:0008270;GO:0008233;GO:0046872;GO:000823	BP:negative regulation of leaf senescence;BP:response to jasmonic acid;BP:response to salt stress;BP:collagen catabolic process;BP:developmental vegetative growth;BP:extracellular matrix organization;BP:response to cadmium ion;BP:proteolysis;BP:regulation of photoperiodism, flowering;BP:multicellular organism development;CC:membrane;CC:extracellular matrix;CC:plasma membrane;CC:anchored component…	------	------	------	------	ENOG410XQ5D	S:Function unknown	NP_177174.1	matrix metalloproteinase [Arabidopsis thaliana]	sp|O04529|2MMP_ARATH;	Metalloendoproteinase 2-MMP OS=Arabidopsis thaliana OX=3702 GN=2MMP PE=1 SV=1;	PF00413.25;PF01471.19	Peptidase_M10;PG_binding_1	Matrixin;Putative peptidoglycan binding domain
AT3G08040	DTX43	Protein DETOXIFICATION 43 [Source:UniProtKB/Swiss-Prot;Acc:Q9SFB0]	6.358	2.66864	0.00199974	0.00739861	yes	up	0.1	0.02	0.08	0.41	0.78	0.37	0.0666667	0.52	GO:0042908;GO:0009737;GO:0055085;GO:0006811;GO:0055072;GO:0016036;GO:0030001;GO:0006879;GO:0034755;GO:0015746;GO:0016020;GO:0005623;GO:0005886;GO:0016021;GO:0015297;GO:0015137;GO:0005381;GO:0042910;GO:004687	BP:xenobiotic transport;BP:response to abscisic acid;BP:transmembrane transport;BP:ion transport;BP:iron ion homeostasis;BP:cellular response to phosphate starvation;BP:metal ion transport;BP:cellular iron ion homeostasis;BP:iron ion transmembrane transport;BP:citrate transport;CC:membrane;CC:cell;CC:plasma membrane;CC:integral component of membrane;MF:antiporter activity;MF:citrate transmembrane…	------	------	------	------	COG0534	S:Function unknown	NP_187461.1	MATE efflux family protein [Arabidopsis thaliana]	sp|Q9SFB0|DTX43_ARATH;	Protein DETOXIFICATION 43 OS=Arabidopsis thaliana OX=3702 GN=DTX43 PE=1 SV=1;	PF01554.19;PF14667.7	MatE;Polysacc_synt_C	MatE;Polysaccharide biosynthesis C-terminal domain
AT2G44070		NagB/RpiA/CoA transferase-like superfamily protein [Source:UniProtKB/TrEMBL;Acc:F4IT40]	6.33	2.66225	0.000498466	0.00216708	yes	up	0.17	0.2	0.08	0.59	1.16	1.73	0.15	1.16	GO:0044237;GO:0006413;GO:0005575;GO:0016740;GO:0003674;GO:000374	BP:cellular metabolic process;BP:translational initiation;CC:cellular_component;MF:transferase activity;MF:molecular_function;MF:translation initiation factor activity;	K03680	EIF2B4	map03013	RNA transport	COG1184	S:Function unknown	NP_181935.2	NagB/RpiA/CoA transferase-like superfamily protein [Arabidopsis thaliana]	sp|Q54FM3|EI2BD_DICDI;	Translation initiation factor eIF-2B subunit delta OS=Dictyostelium discoideum OX=44689 GN=eif2b4 PE=3 SV=1;	PF01008.18	IF-2B	Initiation factor 2 subunit family
AT2G43590		Endochitinase At2g43590 [Source:UniProtKB/Swiss-Prot;Acc:O24658]	6.327	2.66148	1.35223e-70	1.1172e-67	yes	up	11.02	9.06	7.66	64.75	79.58	70.04	9.24667	71.4567	GO:0005975;GO:0016998;GO:0000272;GO:0006952;GO:0008152;GO:0006032;GO:0099503;GO:0016787;GO:0016798;GO:0008061;GO:000456	BP:carbohydrate metabolic process;BP:cell wall macromolecule catabolic process;BP:polysaccharide catabolic process;BP:defense response;BP:metabolic process;BP:chitin catabolic process;CC:secretory vesicle;MF:hydrolase activity;MF:hydrolase activity, acting on glycosyl bonds;MF:chitin binding;MF:chitinase activity;	K01183	E3.2.1.14	map00520	Amino sugar and nucleotide sugar metabolism	COG3979	G:Carbohydrate transport and metabolism	XP_020884057.1	endochitinase At2g43590 [Arabidopsis lyrata subsp. lyrata]	sp|O24658|CHI59_ARATH;	Endochitinase At2g43590 OS=Arabidopsis thaliana OX=3702 GN=At2g43590 PE=2 SV=1;	PF00182.20;PF00187.20	Glyco_hydro_19;Chitin_bind_1	Chitinase class I;Chitin recognition protein
AT3G26840		Acyltransferase-like protein At3g26840, chloroplastic [Source:UniProtKB/Swiss-Prot;Acc:Q9LW26]	6.267	2.64776	2.57352e-19	9.71559e-18	yes	up	0.97	0.99	0.7	4.64	7.08	8.93	0.886667	6.88333	GO:0019432;GO:0033306;GO:0009536;GO:0010287;GO:0009507;GO:0016740;GO:0016746;GO:0016747;GO:0005515;GO:000414	BP:triglyceride biosynthetic process;BP:phytol metabolic process;CC:plastid;CC:plastoglobule;CC:chloroplast;MF:transferase activity;MF:transferase activity, transferring acyl groups;MF:transferase activity, transferring acyl groups other than amino-acyl groups;MF:protein binding;MF:diacylglycerol O-acyltransferase activity;	------	------	------	------	COG0204	I:Lipid transport and metabolism	NP_566801.1	Esterase/lipase/thioesterase family protein [Arabidopsis thaliana]	sp|Q9LW26|Y3684_ARATH;	Acyltransferase-like protein At3g26840, chloroplastic OS=Arabidopsis thaliana OX=3702 GN=At3g26840 PE=1 SV=1;	PF03982.14;PF12146.9;PF12697.8	DAGAT;Hydrolase_4;Abhydrolase_6	Diacylglycerol acyltransferase;Serine aminopeptidase, S33;Alpha/beta hydrolase family
AT5G22580		Stress-response A/B barrel domain-containing protein At5g22580 [Source:UniProtKB/Swiss-Prot;Acc:Q9FK81]	6.241	2.6417	9.2205e-07	7.36851e-06	yes	up	19.81	7.58	6.85	105.66	56.12	94.98	11.4133	85.5867	GO:0008150;GO:0005829;GO:0009536;GO:0009507;GO:004687	BP:biological_process;CC:cytosol;CC:plastid;CC:chloroplast;MF:metal ion binding;	------	------	------	------	ENOG410YNSU	S:Function unknown	NP_568422.1	Stress responsive A/B Barrel Domain-containing protein [Arabidopsis thaliana]	sp|Q9FK81|Y5258_ARATH;	Stress-response A/B barrel domain-containing protein At5g22580 OS=Arabidopsis thaliana OX=3702 GN=At5g22580 PE=1 SV=1;	PF07876.13	Dabb	Stress responsive A/B Barrel Domain
AT4G25760	GDU2	Protein GLUTAMINE DUMPER 2 [Source:UniProtKB/Swiss-Prot;Acc:Q9SW07]	6.233	2.63989	0.0056417	0.018224	yes	up	0.21	0.13	0.14	2.2	0.55	0.91	0.16	1.22	GO:0080143;GO:0006865;GO:0016020;GO:001602	BP:regulation of amino acid export;BP:amino acid transport;CC:membrane;CC:integral component of membrane;	------	------	------	------	ENOG41103SK;ENOG410YP3Q	U:Intracellular trafficking, secretion, and vesicular transport;	NP_567728.1	glutamine dumper 2 [Arabidopsis thaliana]	sp|Q9SW07|GDU2_ARATH;	Protein GLUTAMINE DUMPER 2 OS=Arabidopsis thaliana OX=3702 GN=GDU2 PE=2 SV=1;	------	------	------
AT4G23150	CRK7	Cysteine-rich receptor-like protein kinase 7 [Source:UniProtKB/Swiss-Prot;Acc:Q8L7G3]	6.223	2.63767	0.0103999	0.0308266	yes	up	0.02	0.08	0.02	0.27	0.57	0.2	0.04	0.346667	GO:0006468;GO:0016310;GO:0000302;GO:0042742;GO:0016020;GO:0016021;GO:0005886;GO:0004672;GO:0106311;GO:0004674;GO:0016740;GO:0016301;GO:0000166;GO:0005524;GO:010631	BP:protein phosphorylation;BP:phosphorylation;BP:response to reactive oxygen species;BP:defense response to bacterium;CC:membrane;CC:integral component of membrane;CC:plasma membrane;MF:protein kinase activity;MF:old GO;MF:protein serine/threonine kinase activity;MF:transferase activity;MF:kinase activity;MF:nucleotide binding;MF:ATP binding;MF:old GO;	------	------	------	------	COG0515	T:Signal transduction mechanisms	NP_194046.2	cysteine-rich RLK (RECEPTOR-like protein kinase) 7 [Arabidopsis thaliana]	sp|Q8L7G3|CRK7_ARATH;	Cysteine-rich receptor-like protein kinase 7 OS=Arabidopsis thaliana OX=3702 GN=CRK7 PE=2 SV=1;	PF07714.18;PF00069.26;PF01657.18;PF11883.9	PK_Tyr_Ser-Thr;Pkinase;Stress-antifung;DUF3403	Protein tyrosine and serine/threonine kinase;Protein kinase domain;Salt stress response/antifungal;Domain of unknown function
AT4G30290	XTH19	Xyloglucan endotransglucosylase/hydrolase [Source:UniProtKB/TrEMBL;Acc:A0A178UU22]	6.202	2.63265	0.00533555	0.0173867	yes	up	0.26	0.08	0	0.5	1.08	1.02	0.113333	0.866667	GO:0071365;GO:0042546;GO:0005975;GO:0006073;GO:0071456;GO:0071555;GO:0008152;GO:0010411;GO:0051301;GO:0005794;GO:0005618;GO:0048046;GO:0005576;GO:0016787;GO:0016798;GO:0016762;GO:0016740;GO:000455	BP:cellular response to auxin stimulus;BP:cell wall biogenesis;BP:carbohydrate metabolic process;BP:cellular glucan metabolic process;BP:cellular response to hypoxia;BP:cell wall organization;BP:metabolic process;BP:xyloglucan metabolic process;BP:cell division;CC:Golgi apparatus;CC:cell wall;CC:apoplast;CC:extracellular region;MF:hydrolase activity;MF:hydrolase activity, acting on glycosyl bonds…	K08235	E2.4.1.207	------	------	COG2273	U:Intracellular trafficking, secretion, and vesicular transport	NP_194758.1	xyloglucan endotransglucosylase/hydrolase 19 [Arabidopsis thaliana]	sp|Q9M0D1|XTH19_ARATH;	Xyloglucan endotransglucosylase/hydrolase protein 19 OS=Arabidopsis thaliana OX=3702 GN=XTH19 PE=1 SV=1;	PF00722.22;PF06955.13	Glyco_hydro_16;XET_C	Glycosyl hydrolases family 16;Xyloglucan endo-transglycosylase
AT2G27389		unknown protein; LOCATED IN: endomembrane system. [Source:TAIR;Acc:AT2G27389]	6.198	2.63174	7.88653e-05	0.000419333	yes	up	1.23	0.22	1.05	2.61	12.69	3.94	0.833333	6.41333	GO:001602	CC:integral component of membrane;	------	------	------	------	ENOG41107WP	S:Function unknown	NP_001189619.1	hypothetical protein AT2G27389 [Arabidopsis thaliana]	------	------	------	------	------
AT5G41740		Disease resistance protein (TIR-NBS-LRR class) family [Source:UniProtKB/TrEMBL;Acc:F4JYI4]	6.197	2.63167	9.95185e-39	1.44443e-36	yes	up	2.35	2.14	2.45	15.44	24.33	13.48	2.31333	17.75	GO:0007165;GO:0016787;GO:0043531;GO:0005515;GO:0050135;GO:0003953;GO:006180	BP:signal transduction;MF:hydrolase activity;MF:ADP binding;MF:protein binding;MF:NA;MF:NAD+ nucleosidase activity;MF:NAD+ nucleotidase, cyclic ADP-ribose generating;	------	------	------	------	ENOG410XRGK;ENOG4112BMQ;COG4886	S:Function unknown;	NP_001154757.1	Disease resistance protein (TIR-NBS-LRR class) family [Arabidopsis thaliana]	sp|F4I594|RLM1A_ARATH;	Disease resistance protein RML1A OS=Arabidopsis thaliana OX=3702 GN=RLM1A PE=3 SV=1;	PF01582.21;PF00931.23;PF13676.7;PF13191.7;PF13401.7;PF00004.30;PF07725.13;PF01637.19;PF05729.13	TIR;NB-ARC;TIR_2;AAA_16;AAA_22;AAA;LRR_3;ATPase_2;NACHT	TIR domain;NB-ARC domain;TIR domain;AAA ATPase domain;AAA domain;ATPase family associated with various cellular activities;Leucine Rich Repeat;ATPase domain predominantly from Archaea;NACHT domain
AT3G05150		Major facilitator superfamily protein [Source:UniProtKB/TrEMBL;Acc:A0A1I9LPR9]	6.174	2.62623	1.22811e-05	7.83527e-05	yes	up	0.1	0.26	0.35	1.95	0.87	2.36	0.236667	1.72667	GO:0046323;GO:0055085;GO:0016021;GO:0016020;GO:0005887;GO:0005634;GO:0005351;GO:002285	BP:glucose import;BP:transmembrane transport;CC:integral component of membrane;CC:membrane;CC:integral component of plasma membrane;CC:nucleus;MF:suga;MF:transmembrane transporter activity;	K08145	SLC2A8, GLUT8	------	------	ENOG410XNQK	G:Carbohydrate transport and metabolism	NP_001326594.1	Major facilitator superfamily protein [Arabidopsis thaliana]	sp|Q0WQ63|ERDL8_ARATH;	Sugar transporter ERD6-like 8 OS=Arabidopsis thaliana OX=3702 GN=At3g05150 PE=2 SV=1;	PF00083.25;PF07690.17	Sugar_tr;MFS_1	Sugar;Major Facilitator Superfamily
AT1G79310	AMC7	Metacaspase-7 [Source:UniProtKB/Swiss-Prot;Acc:Q6XPT5]	6.162	2.62346	0.000513767	0.00222639	yes	up	0.17	0.16	0.07	0.67	0.64	1.67	0.133333	0.993333	GO:0006508;GO:0008233;GO:0008234;GO:001678	BP:proteolysis;MF:peptidase activity;MF:cysteine-type peptidase activity;MF:hydrolase activity;	------	------	------	------	ENOG410Y41C	U:Intracellular trafficking, secretion, and vesicular transport	NP_178049.2	metacaspase 7 [Arabidopsis thaliana]	sp|Q6XPT5|MCA7_ARATH;	Metacaspase-7 OS=Arabidopsis thaliana OX=3702 GN=AMC7 PE=1 SV=1;	PF00656.23	Peptidase_C14	Caspase domain
AT4G35160	ASMT	Acetylserotonin O-methyltransferase [Source:UniProtKB/Swiss-Prot;Acc:Q9T003]	6.159	2.62279	1.13723e-05	7.30308e-05	yes	up	0.18	0.21	0.15	1.39	1.35	1.34	0.18	1.36	GO:0030187;GO:0019438;GO:0032259;GO:0005737;GO:0008757;GO:0016740;GO:0008171;GO:0017096;GO:0008168;GO:004698	BP:melatonin biosynthetic process;BP:aromatic compound biosynthetic process;BP:methylation;CC:cytoplasm;MF:S-adenosylmethionine-dependent methyltransferase activity;MF:transferase activity;MF:O-methyltransferase activity;MF:acetylserotonin O-methyltransferase activity;MF:methyltransferase activity;MF:protein dimerization activity;	K22588	ASMT	map00380	Tryptophan metabolism	ENOG410XS7T	S:Function unknown	NP_195242.1	O-methyltransferase family protein [Arabidopsis thaliana]	sp|Q9T003|ASMT_ARATH;	Acetylserotonin O-methyltransferase OS=Arabidopsis thaliana OX=3702 GN=ASMT PE=1 SV=1;	PF00891.19;PF08100.12;PF02082.21	Methyltransf_2;Dimerisation;Rrf2	O-methyltransferase domain;Dimerisation domain;Iron-dependent Transcriptional regulator
AT5G38900		Thioredoxin superfamily protein [Source:TAIR;Acc:AT5G38900]	6.091	2.60657	3.16727e-12	5.6043e-11	yes	up	1.79	2.42	2.22	9.81	27.65	11.64	2.14333	16.3667	GO:0009817;GO:0005829;GO:0015035;GO:001649	BP:defense response to fungus, incompatible interaction;CC:cytosol;MF:protein disulfide oxidoreductase activity;MF:oxidoreductase activity;	------	------	------	------	COG2761	Q:Secondary metabolites biosynthesis, transport and catabolism	NP_001331080.1	Thioredoxin superfamily protein [Arabidopsis thaliana]	sp|P39598|YWBO_BACSU;	Uncharacterized protein YwbO OS=Bacillus subtilis;	PF01323.21;PF13192.7	DSBA;Thioredoxin_3	DSBA-like thioredoxin domain;Thioredoxin domain
AT1G77200	ERF037	Ethylene-responsive transcription factor ERF037 [Source:UniProtKB/Swiss-Prot;Acc:O80654]	6.078	2.60361	0.000142846	0.000714429	yes	up	0.38	0.21	0.11	1.25	1.9	2.04	0.233333	1.73	GO:0006355;GO:0009873;GO:0005634;GO:0003700;GO:0003677;GO:000551	BP:regulation of transcription, DNA-templated;BP:ethylene-activated signaling pathway;CC:nucleus;MF:transcription factor activity, sequence-specific DNA binding;MF:DNA binding;MF:protein binding;	------	------	------	------	ENOG411060U	K:Transcription	NP_177844.1	Integrase-type DNA-binding superfamily protein [Arabidopsis thaliana]	sp|O80654|ERF37_ARATH;	Ethylene-responsive transcription factor ERF037 OS=Arabidopsis thaliana OX=3702 GN=ERF037 PE=2 SV=1;	PF00847.21	AP2	AP2 domain
AT4G07820		At4g07820 [Source:UniProtKB/TrEMBL;Acc:Q9ZPG2]	6.066	2.60065	0.00154898	0.00591574	yes	up	0.33	0.47	0.17	0.7	2.59	3.84	0.323333	2.37667	GO:0005576;GO:0005615;GO:000367	CC:extracellular region;CC:extracellular space;MF:molecular_function;	K13449	PR1	map04016;map04626;map04075	MAPK signaling pathway - plant;Plant-pathogen interaction;Plant hormone signal transduction	COG2340	S:Function unknown	NP_192524.1	CAP (Cysteine-rich secretory proteins, Antigen 5, and Pathogenesis-related 1 protein) superfamily protein [Arabidopsis thaliana]	sp|P33154|PR1_ARATH;	Pathogenesis-related protein 1 OS=Arabidopsis thaliana OX=3702 GN=At2g14610 PE=1 SV=1;	PF00188.27	CAP	Cysteine-rich secretory protein family
AT4G39670		ACD11 homolog protein [Source:UniProtKB/Swiss-Prot;Acc:Q8L7U7]	6.049	2.59662	0.00672015	0.0212434	yes	up	0.63	1.21	1.14	3.48	16.98	1.88	0.993333	7.44667	GO:1902389;GO:0035627;GO:0006869;GO:0120009;GO:0005737;GO:0005634;GO:0016020;GO:0005829;GO:0008289;GO:1902388;GO:0120013;GO:190238	BP:ceramide 1-phosphate transport;BP:ceramide transport;BP:lipid transport;BP:intermembrane lipid transfer;CC:cytoplasm;CC:nucleus;CC:membrane;CC:cytosol;MF:lipid binding;MF:ceramide 1-phosphate transporter activity;MF:lipid transfer activity;MF:ceramide 1-phosphate binding;	------	------	------	------	ENOG4111NKT	E:Amino acid transport and metabolism	NP_195677.2	Glycolipid transfer protein (GLTP) family protein [Arabidopsis thaliana]	sp|Q8L7U7|ACDH_ARATH;	ACD11 homolog protein OS=Arabidopsis thaliana OX=3702 GN=At4g39670 PE=2 SV=1;	PF08718.12	GLTP	Glycolipid transfer protein
AT3G21950		S-adenosyl-L-methionine-dependent methyltransferases superfamily protein [Source:UniProtKB/TrEMBL;Acc:A0A1I9LSP4]	5.982	2.58065	4.48675e-10	6.12324e-09	yes	up	0.46	0.48	0.35	3.42	2.35	3.67	0.43	3.14667	GO:0006633;GO:0046686;GO:0032259;GO:0008757;GO:0016740;GO:000816	BP:fatty acid biosynthetic process;BP:response to cadmium ion;BP:methylation;MF:S-adenosylmethionine-dependent methyltransferase activity;MF:transferase activity;MF:methyltransferase activity;	------	------	------	------	ENOG410Y96G	S:Function unknown	NP_001327559.1	S-adenosyl-L-methionine-dependent methyltransferases superfamily protein [Arabidopsis thaliana]	sp|Q6XMI3|BSMT1_ARATH;	Salicylate/benzoate carboxyl methyltransferase OS=Arabidopsis thaliana OX=3702 GN=BSMT1 PE=1 SV=1;	PF03492.16	Methyltransf_7	SAM dependent carboxyl methyltransferase
AT4G29800	PLP8	PATATIN-like protein 8 [Source:TAIR;Acc:AT4G29800]	5.969	2.57754	0.012407	0.0359185	yes	up	0.05	0.05	0.03	0.3	0.45	0.31	0.0433333	0.353333	GO:0006952;GO:0006629;GO:0016042;GO:001678	BP:defense response;BP:lipid metabolic process;BP:lipid catabolic process;MF:hydrolase activity;	------	------	------	------	COG3621	S:Function unknown	NP_001190866.1	PATATIN-like protein 8 [Arabidopsis thaliana]	sp|Q8H133|PLP8_ARATH;	Patatin-like protein 8 OS=Arabidopsis thaliana OX=3702 GN=PLP8 PE=2 SV=1;	PF01734.23	Patatin	Patatin-like phospholipase
AT5G09805	IDL3	Protein IDA-LIKE 3 [Source:UniProtKB/Swiss-Prot;Acc:Q6DUW7]	5.955	2.5742	0.00035673	0.00160918	yes	up	0.48	0.28	0.58	2.28	1.84	5.4	0.446667	3.17333	GO:0010227;GO:0048046;GO:0005576;GO:000561	BP:floral organ abscission;CC:apoplast;CC:extracellular region;CC:extracellular space;	------	------	------	------	ENOG41108WV;ENOG411189Q	U:Intracellular trafficking, secretion, and vesicular transport;S:Function unknown	NP_001318520.1	inflorescence deficient in abscission (IDA)-like 3 [Arabidopsis thaliana]	sp|Q6DUW7|IDL3_ARATH;	Protein IDA-LIKE 3 OS=Arabidopsis thaliana OX=3702 GN=IDL3 PE=2 SV=1;	------	------	------
AT1G54040	ESP	Epithiospecifier protein [Source:UniProtKB/Swiss-Prot;Acc:Q8RY71]	5.95	2.57285	0.00151427	0.00580859	yes	up	0.04	0.2	0.17	0.62	1.5	0.86	0.136667	0.993333	GO:0010150;GO:0050790;GO:0009753;GO:0080028;GO:0019762;GO:0042742;GO:0005737;GO:0005634;GO:0005829;GO:0005515;GO:003023	BP:leaf senescence;BP:regulation of catalytic activity;BP:response to jasmonic acid;BP:nitrile biosynthetic process;BP:glucosinolate catabolic process;BP:defense response to bacterium;CC:cytoplasm;CC:nucleus;CC:cytosol;MF:protein binding;MF:enzyme regulator activity;	------	------	------	------	ENOG410Y5WM	U:Intracellular trafficking, secretion, and vesicular transport	NP_175806.3	epithiospecifier protein [Arabidopsis thaliana]	sp|Q8RY71|ESP_ARATH;	Epithiospecifier protein OS=Arabidopsis thaliana OX=3702 GN=ESP PE=1 SV=2;	PF01344.26;PF13964.7;PF13418.7;PF07646.16;PF13415.7;PF13854.7	Kelch_1;Kelch_6;Kelch_4;Kelch_2;Kelch_3;Kelch_5	Kelch motif;Kelch motif;Galactose oxidase, central domain;Kelch motif;Galactose oxidase, central domain;Kelch motif
AT2G32487		unknown protein; FUNCTIONS IN: molecular_function unknown; INVOLVED IN: biological_process unknown; LOCATED IN: endomembrane system; Ha. [Source:TAIR;Acc:AT2G32487]	5.941	2.57059	3.41491e-06	2.43141e-05	yes	up	0.84	2.05	0.53	6.37	8.33	9.68	1.14	8.12667	GO:0016021;GO:0008408;GO:000367	CC:integral component of membrane;MF:3'-5' exonuclease activity;MF:nucleic acid binding;	------	------	------	------	------	------	NP_001324541.1	hypothetical protein AT2G32487 [Arabidopsis thaliana]	------	------	------	------	------
AT1G78320	GSTU23	Glutathione S-transferase U23 [Source:UniProtKB/Swiss-Prot;Acc:Q9M9F1]	5.928	2.56758	0.00600032	0.0192694	yes	up	0.49	0	0.16	1.85	1.57	1.07	0.216667	1.49667	GO:0006749;GO:0009636;GO:0009407;GO:0005737;GO:0005829;GO:0005739;GO:0004364;GO:0016740;GO:000551	BP:glutathione metabolic process;BP:response to toxic substance;BP:toxin catabolic process;CC:cytoplasm;CC:cytosol;CC:mitochondrion;MF:glutathione transferase activity;MF:transferase activity;MF:protein binding;	K00799	GST, gst	map00480	Glutathione metabolism	ENOG410XSIX	S:Function unknown	NP_177955.1	glutathione S-transferase TAU 23 [Arabidopsis thaliana]	sp|Q9M9F1|GSTUN_ARATH;	Glutathione S-transferase U23 OS=Arabidopsis thaliana OX=3702 GN=GSTU23 PE=1 SV=1;	PF02798.21;PF13410.7;PF13417.7;PF00043.26;PF13409.7;PF17171.5;PF14497.7	GST_N;GST_C_2;GST_N_3;GST_C;GST_N_2;GST_C_6;GST_C_3	Glutathione S-transferase, N-terminal domain;Glutathione S-transferase, C-terminal domain;Glutathione S-transferase, N-terminal domain;Glutathione S-transferase, C-terminal domain;Glutathione S-transferase, N-terminal domain;Glutathione S-transferase, C-terminal domain;Glutathione S-transferase, C-terminal domain
AT5G66800		Emb [Source:UniProtKB/TrEMBL;Acc:Q9FL00]	5.922	2.5661	2.21072e-06	1.6381e-05	yes	up	0.61	0.19	0.36	1.99	3.1	3.3	0.386667	2.79667	GO:0016310;GO:001630	BP:phosphorylation;MF:kinase activity;	------	------	------	------	ENOG410YTQ9	S:Function unknown	NP_201481.1	membrane-associated kinase regulator-like protein [Arabidopsis thaliana]	------	------	------	------	------
AT3G07000		At3g07000 [Source:UniProtKB/TrEMBL;Acc:Q9M8Z9]	5.919	2.56526	0.00171426	0.00646035	yes	up	0.18	0.02	0.05	0.63	0.43	0.76	0.0833333	0.606667	GO:004687	MF:metal ion binding;	------	------	------	------	ENOG41119PW	S:Function unknown	NP_187356.1	Cysteine/Histidine-rich C1 domain family protein [Arabidopsis thaliana]	------	------	PF03107.17;PF00130.23	C1_2;C1_1	C1 domain;Phorbol esters/diacylglycerol binding domain
AT1G12570		At1g12570 [Source:UniProtKB/TrEMBL;Acc:Q66GI5]	5.889	2.558	0.0122711	0.035573	yes	up	0.02	0.13	0	0.37	0.48	0.28	0.05	0.376667	GO:0055114;GO:0050660;GO:001661	BP:oxidation-reduction process;MF:flavin adenine dinucleotide binding;MF:oxidoreductase activity, acting on CH-OH group of donors;	------	------	------	------	COG2303	G:Carbohydrate transport and metabolism	NP_172718.2	Glucose-methanol-choline (GMC) oxidoreductase family protein [Arabidopsis thaliana]	sp|Q9S746|HTH_ARATH;	Protein HOTHEAD OS=Arabidopsis thaliana OX=3702 GN=HTH PE=1 SV=1;	PF00732.20;PF05199.14;PF01266.25;PF07992.15;PF05834.13	GMC_oxred_N;GMC_oxred_C;DAO;Pyr_redox_2;Lycopene_cycl	GMC oxidoreductase;GMC oxidoreductase;FAD dependent oxidoreductase;Pyridine nucleotide-disulphide oxidoreductase;Lycopene cyclase protein
AT1G19180	TIFY10A	TIFY10A [Source:UniProtKB/TrEMBL;Acc:A0A178W7G1]	5.887	2.55748	1.36232e-68	9.75467e-66	yes	up	15.87	13.17	17.71	92.72	127.3	117.75	15.5833	112.59	GO:2000022;GO:0009555;GO:0009753;GO:0009867;GO:0009611;GO:0006952;GO:0042742;GO:0009908;GO:0031347;GO:1900067;GO:0005634;GO:0016787;GO:0042802;GO:000551	BP:regulation of jasmonic acid mediated signaling pathway;BP:pollen development;BP:response to jasmonic acid;BP:jasmonic acid mediated signaling pathway;BP:response to wounding;BP:defense response;BP:defense response to bacterium;BP:flower development;BP:regulation of defense response;BP:regulation of cellular response to alkaline pH;CC:nucleus;MF:hydrolase activity;MF:identical protein binding;M…	K13464	JAZ	map04075	Plant hormone signal transduction	ENOG410ZDCD	S:Function unknown	NP_001319041.1	jasmonate-zim-domain protein 1 [Arabidopsis thaliana]	sp|Q9LMA8|TI10A_ARATH;	Protein TIFY 10A OS=Arabidopsis thaliana OX=3702 GN=TIFY10A PE=1 SV=1;	PF06200.15;PF09425.11	tify;Jas_motif	tify domain;Jas motif
AT4G34650	SQS2	Inactive squalene synthase 2 [Source:UniProtKB/Swiss-Prot;Acc:O65688]	5.881	2.55617	1.06315e-06	8.41471e-06	yes	up	0.53	0.06	0.53	3.01	2.37	2.69	0.373333	2.69	GO:0016126;GO:0009058;GO:0045338;GO:0008610;GO:0005783;GO:0016021;GO:0016020;GO:0005789;GO:0004310;GO:0016740;GO:005199	BP:sterol biosynthetic process;BP:biosynthetic process;BP:farnesyl diphosphate metabolic process;BP:lipid biosynthetic process;CC:endoplasmic reticulum;CC:integral component of membrane;CC:membrane;CC:endoplasmic reticulum membrane;MF:farnesyl-diphosphate farnesyltransferase activity;MF:transferase activity;MF:squalene synthase activity;	K00801	FDFT1	map00909;map00100	Sesquiterpenoid and triterpenoid biosynthesis;Steroid biosynthesis	COG1562	I:Lipid transport and metabolism	NP_195191.2	squalene synthase 2 [Arabidopsis thaliana]	sp|O65688|FDFT2_ARATH;	Inactive squalene synthase 2 OS=Arabidopsis thaliana OX=3702 GN=SQS2 PE=1 SV=2;	PF00494.20	SQS_PSY	Squalene/phytoene synthase
AT1G57590	PAE2	Pectin acetylesterase 2 [Source:UniProtKB/Swiss-Prot;Acc:F4I839]	5.864	2.55189	2.49414e-05	0.000148535	yes	up	0.17	0.13	0.3	1.4	1.95	0.96	0.2	1.43667	GO:0071555;GO:0005618;GO:0016021;GO:0005576;GO:0009505;GO:0016787;GO:0052793;GO:005268	BP:cell wall organization;CC:cell wall;CC:integral component of membrane;CC:extracellular region;CC:plant-type cell wall;MF:hydrolase activity;MF:pectin acetylesterase activity;MF:carboxylic ester hydrolase activity;	K19882	NOTUM	------	------	ENOG410XQKD;COG1696	S:Function unknown;M:Cell wall/membrane/envelope biogenesis	NP_176072.3	Pectinacetylesterase family protein [Arabidopsis thaliana]	sp|F4I839|PAE2_ARATH;	Pectin acetylesterase 2 OS=Arabidopsis thaliana OX=3702 GN=PAE2 PE=2 SV=1;	PF03283.14	PAE	Pectinacetylesterase
AT1G06160	ERF094	Ethylene-responsive transcription factor ERF094 [Source:UniProtKB/Swiss-Prot;Acc:Q9LND1]	5.863	2.55169	4.42097e-47	1.00474e-44	yes	up	8.39	7.69	8.79	49.57	55.51	72.9	8.29	59.3267	GO:0009753;GO:0009873;GO:0009723;GO:0006355;GO:0009861;GO:0005634;GO:0003700;GO:000367	BP:response to jasmonic acid;BP:ethylene-activated signaling pathway;BP:response to ethylene;BP:regulation of transcription, DNA-templated;BP:jasmonic acid and ethylene-dependent systemic resistance;CC:nucleus;MF:transcription factor activity, sequence-specific DNA binding;MF:DNA binding;	K14516	ERF1	map04016;map04075	MAPK signaling pathway - plant;Plant hormone signal transduction	ENOG41114BY	K:Transcription	NP_172106.1	octadecanoid-responsive AP2/ERF 59 [Arabidopsis thaliana]	sp|Q9LND1|ERF94_ARATH;	Ethylene-responsive transcription factor ERF094 OS=Arabidopsis thaliana OX=3702 GN=ERF094 PE=2 SV=1;	PF00847.21	AP2	AP2 domain
AT4G31950	CYP82C3	CYP82C3 [Source:UniProtKB/TrEMBL;Acc:A0A178UT04]	5.848	2.54797	0.0016126	0.00612668	yes	up	0.17	0.29	0.24	0.71	4	0.38	0.233333	1.69667	GO:0106146;GO:0071281;GO:0006952;GO:0071456;GO:0098542;GO:0010039;GO:0055114;GO:0016020;GO:0016021;GO:0004497;GO:0020037;GO:0016709;GO:0016705;GO:0106144;GO:0106149;GO:0005506;GO:0046872;GO:001649	BP:sideretin biosynthesis;BP:cellular response to iron ion;BP:defense response;BP:cellular response to hypoxia;BP:defense response to other organism;BP:response to iron ion;BP:oxidation-reduction process;CC:membrane;CC:integral component of membrane;MF:monooxygenase activity;MF:heme binding;MF:oxidoreductase activity, acting on paired donors, with incorporation or reduction of molecular oxygen, N…	K23136;K23137	CYP82C4;CYP82C2	------	------	COG2124	S:Function unknown	NP_194923.1	cytochrome P450, family 82, subfamily C, polypeptide 3 [Arabidopsis thaliana]	sp|O49396|C82C3_ARATH;	Cytochrome P450 82C3 OS=Arabidopsis thaliana OX=3702 GN=CYP82C3 PE=2 SV=3;	PF00067.23	p450	Cytochrome P450
AT3G14370	WAG2	WAG2 [Source:UniProtKB/TrEMBL;Acc:A0A178VAK4]	5.767	2.52785	0.000556087	0.00238668	yes	up	0.43	0.29	0	2.36	0.76	2	0.24	1.70667	GO:0006468;GO:0048825;GO:0009734;GO:0016310;GO:0009926;GO:0106311;GO:0007275;GO:0040008;GO:0005737;GO:0005634;GO:0005886;GO:0005829;GO:0016301;GO:0000166;GO:0004674;GO:0016740;GO:0004672;GO:0005524;GO:010631	BP:protein phosphorylation;BP:cotyledon development;BP:auxin-activated signaling pathway;BP:phosphorylation;BP:auxin polar transport;BP:old GO;BP:multicellular organism development;BP:regulation of growth;CC:cytoplasm;CC:nucleus;CC:plasma membrane;CC:cytosol;MF:kinase activity;MF:nucleotide binding;MF:protein serine/threonine kinase activity;MF:transferase activity;MF:protein kinase activity;MF:A…	------	------	------	------	ENOG410XQ0C	S:Function unknown	NP_188054.1	Protein kinase superfamily protein [Arabidopsis thaliana]	sp|Q9LUL2|WAG2_ARATH;	Serine/threonine-protein kinase WAG2 OS=Arabidopsis thaliana OX=3702 GN=WAG2 PE=2 SV=1;	PF00069.26;PF07714.18	Pkinase;PK_Tyr_Ser-Thr	Protein kinase domain;Protein tyrosine and serine/threonine kinase
AT1G01120	KCS1	3-ketoacyl-CoA synthase [Source:UniProtKB/TrEMBL;Acc:A0A178W124]	5.707	2.51276	1.17813e-15	3.10139e-14	yes	up	2.02	1.1	0.59	9.03	8.17	8.74	1.23667	8.64667	GO:0006633;GO:0070417;GO:0010025;GO:0009416;GO:0009409;GO:0042761;GO:0022626;GO:0005783;GO:0016021;GO:0016020;GO:0005789;GO:0102338;GO:0102337;GO:0009922;GO:0016740;GO:0016747;GO:0005515;GO:0102336;GO:0016746;GO:010275	BP:fatty acid biosynthetic process;BP:cellular response to cold;BP:wax biosynthetic process;BP:response to light stimulus;BP:response to cold;BP:very long-chain fatty acid biosynthetic process;CC:cytosolic ribosome;CC:endoplasmic reticulum;CC:integral component of membrane;CC:membrane;CC:endoplasmic reticulum membrane;MF:3-oxo-lignoceronyl-CoA synthase activity;MF:3-oxo-cerotoyl-CoA synthase acti…	K15397	KCS	map04626;map00062	Plant-pathogen interaction;Fatty acid elongation	ENOG410Y5VH	S:Function unknown	NP_171620.2	3-ketoacyl-CoA synthase 1 [Arabidopsis thaliana]	sp|Q9MAM3|KCS1_ARATH;	3-ketoacyl-CoA synthase 1 OS=Arabidopsis thaliana OX=3702 GN=KCS1 PE=1 SV=1;	PF08392.13;PF08541.11;PF02797.16	FAE1_CUT1_RppA;ACP_syn_III_C;Chal_sti_synt_C	FAE1/Type III polyketide synthase-like protein;3-Oxoacyl-[acyl-carrier-protein;Chalcone and stilbene synthases, C-terminal domain
AT1G17170	GSTU24	Glutathione S-transferase U24 [Source:UniProtKB/Swiss-Prot;Acc:Q9SHH6]	5.677	2.50516	7.116e-35	8.63608e-33	yes	up	2.39	2.81	2.73	18.07	19.85	17.33	2.64333	18.4167	GO:0006749;GO:0046256;GO:0009636;GO:0009407;GO:0005737;GO:0005829;GO:0004364;GO:0016740;GO:0005515;GO:004329	BP:glutathione metabolic process;BP:2,4,6-trinitrotoluene catabolic process;BP:response to toxic substance;BP:toxin catabolic process;CC:cytoplasm;CC:cytosol;MF:glutathione transferase activity;MF:transferase activity;MF:protein binding;MF:glutathione binding;	K00799	GST, gst	map00480	Glutathione metabolism	ENOG410XSIX	G:Carbohydrate transport and metabolism	NP_173160.1	glutathione S-transferase TAU 24 [Arabidopsis thaliana]	sp|Q9SHH6|GSTUO_ARATH;	Glutathione S-transferase U24 OS=Arabidopsis thaliana OX=3702 GN=GSTU24 PE=2 SV=1;	PF02798.21;PF13417.7;PF13410.7;PF13409.7;PF00043.26	GST_N;GST_N_3;GST_C_2;GST_N_2;GST_C	Glutathione S-transferase, N-terminal domain;Glutathione S-transferase, N-terminal domain;Glutathione S-transferase, C-terminal domain;Glutathione S-transferase, N-terminal domain;Glutathione S-transferase, C-terminal domain
AT1G25510		Eukaryotic aspartyl protease family protein [Source:UniProtKB/TrEMBL;Acc:Q9C6M0]	5.676	2.50492	3.79044e-07	3.24005e-06	yes	up	0.38	0.15	0.16	1.5	1.56	1.72	0.23	1.59333	GO:0006508;GO:0030163;GO:0008233;GO:0004190;GO:001678	BP:proteolysis;BP:protein catabolic process;MF:peptidase activity;MF:aspartic-type endopeptidase activity;MF:hydrolase activity;	K22683	APF2	------	------	ENOG410XNV7	S:Function unknown	NP_173922.1	Eukaryotic aspartyl protease family protein [Arabidopsis thaliana]	sp|Q9LS40|ASPG1_ARATH;	Protein ASPARTIC PROTEASE IN GUARD CELL 1 OS=Arabidopsis thaliana OX=3702 GN=ASPG1 PE=1 SV=1;	PF14543.7;PF14541.7;PF00026.24	TAXi_N;TAXi_C;Asp	Xylanase inhibitor N-terminal;Xylanase inhibitor C-terminal;Eukaryotic aspartyl protease
AT5G16960		Quinone oxidoreductase-like protein [Source:UniProtKB/TrEMBL;Acc:Q9LFK5]	5.666	2.50233	0.00336918	0.0116863	yes	up	0.52	0.58	2.7	9.43	10.27	4.86	1.26667	8.18667	GO:0006979;GO:0055114;GO:0009536;GO:0032440;GO:001649	BP:response to oxidative stress;BP:oxidation-reduction process;CC:plastid;MF:2-alkenal reductase [NA;MF:oxidoreductase activity;	K08070	E1.3.1.74	------	------	COG2130	S:Function unknown	NP_001318576.1	Zinc-binding dehydrogenase family protein [Arabidopsis thaliana]	sp|Q39173|P2_ARATH;	NADP-dependent alkenal double bond reductase P2 OS=Arabidopsis thaliana OX=3702 GN=P2 PE=2 SV=2;	PF00107.27;PF16884.6;PF13602.7	ADH_zinc_N;ADH_N_2;ADH_zinc_N_2	Zinc-binding dehydrogenase;N-terminal domain of oxidoreductase;Zinc-binding dehydrogenase
AT1G11160		Katanin p80 WD40 repeat-containing subunit B1 homolog [Source:UniProtKB/TrEMBL;Acc:F4I7E1]	5.664	2.50172	1.35803e-05	8.57241e-05	yes	up	0.1	0.06	0.07	0.42	0.64	0.55	0.0766667	0.536667	GO:0051013;GO:0007019;GO:0005737;GO:0005856;GO:0080008;GO:0008352;GO:0005874;GO:0008017;GO:000551	BP:microtubule severing;BP:microtubule depolymerization;CC:cytoplasm;CC:cytoskeleton;CC:Cul4-RING E3 ubiquitin ligase complex;CC:katanin complex;CC:microtubule;MF:microtubule binding;MF:protein binding;	K18643	KATNB1	------	------	ENOG410XQAC	S:Function unknown	NP_172582.2	Transducin/WD40 repeat-like superfamily protein [Arabidopsis thaliana]	sp|Q8H0T9|KTNB1_ARATH;	Katanin p80 WD40 repeat-containing subunit B1 homolog OS=Arabidopsis thaliana OX=3702 GN=At5g23430 PE=2 SV=3;	PF13925.7;PF00400.33;PF12894.8;PF08662.12	Katanin_con80;WD40;ANAPC4_WD40;eIF2A	con80 domain of Katanin;WD domain, G-beta repeat;Anaphase-promoting complex subunit 4 WD40 domain;Eukaryotic translation initiation factor eIF2A
AT3G08770	LTP6	Non-specific lipid-transfer protein [Source:UniProtKB/TrEMBL;Acc:F4IXC6]	5.647	2.49738	7.76419e-09	8.77803e-08	yes	up	2.29	1.25	0.71	8.04	12.31	8.61	1.41667	9.65333	GO:0009414;GO:0006869;GO:0016020;GO:000828	BP:response to water deprivation;BP:lipid transport;CC:membrane;MF:lipid binding;	------	------	------	------	ENOG410YT63	U:Intracellular trafficking, secretion, and vesicular transport	NP_001189842.1	lipid transfer protein 6 [Arabidopsis thaliana]	sp|Q9LDB4|NLTP6_ARATH;	Non-specific lipid-transfer protein 6 OS=Arabidopsis thaliana OX=3702 GN=LTP6 PE=3 SV=1;	PF00234.23;PF14368.7	Tryp_alpha_amyl;LTP_2	Protease inhibitor/seed storage/LTP family;Probable lipid transfer
AT4G13195	CLE44	CLAVATA3/ESR (CLE)-related protein 44 [Source:UniProtKB/Swiss-Prot;Acc:Q941C5]	5.646	2.49722	2.43279e-09	2.97262e-08	yes	up	0.38	0.37	0.58	2.93	2.84	3.57	0.443333	3.11333	GO:0010089;GO:0010067;GO:0010088;GO:0010087;GO:0010078;GO:0045168;GO:0045595;GO:0030154;GO:0090506;GO:0007275;GO:0016021;GO:0005615;GO:0016020;GO:0048046;GO:0005576;GO:003361	BP:xylem development;BP:procambium histogenesis;BP:phloem development;BP:phloem or xylem histogenesis;BP:maintenance of root meristem identity;BP:cell-cell signaling involved in cell fate commitment;BP:regulation of cell differentiation;BP:cell differentiation;BP:axillary shoot meristem initiation;BP:multicellular organism development;CC:integral component of membrane;CC:extracellular space;CC:me…	------	------	------	------	ENOG41115N3	S:Function unknown	NP_567397.1	CLAVATA3/ESR-RELATED 44 [Arabidopsis thaliana]	sp|Q941C5|CLE44_ARATH;	CLAVATA3/ESR;	------	------	------
AT4G34810		SAUR-like auxin-responsive protein family [Source:TAIR;Acc:AT4G34810]	5.602	2.48595	4.38405e-05	0.000246851	yes	up	2.5	0.38	0.66	7.22	5.77	10.25	1.18	7.74667	GO:0009733;GO:000367	BP:response to auxin;MF:molecular_function;	bna;K14488	;SAUR	map04075	Plant hormone signal transduction	ENOG410YVUY	S:Function unknown	NP_195207.2	SAUR-like auxin-responsive protein family [Arabidopsis thaliana]	sp|Q9FJG0|SAU20_ARATH;	Auxin-responsive protein SAUR20 OS=Arabidopsis thaliana OX=3702 GN=SAUR20 PE=2 SV=1;	PF02519.15	Auxin_inducible	Auxin responsive protein
AT4G14400	ACD6	Protein ACCELERATED CELL DEATH 6 [Source:UniProtKB/Swiss-Prot;Acc:Q8LPS2]	5.597	2.48476	6.93437e-09	7.86884e-08	yes	up	7.15	11.02	3.8	44.84	57.85	49.15	7.32333	50.6133	GO:0009617;GO:0009416;GO:0042742;GO:0050826;GO:0008219;GO:0031347;GO:0009751;GO:0009615;GO:2000031;GO:1900150;GO:0006952;GO:1900426;GO:0009816;GO:1902290;GO:0016567;GO:0071446;GO:0005783;GO:0005789;GO:0030176;GO:0016021;GO:0016020;GO:0005887;GO:0005886;GO:000551	BP:response to bacterium;BP:response to light stimulus;BP:defense response to bacterium;BP:response to freezing;BP:cell death;BP:regulation of defense response;BP:response to salicylic acid;BP:response to virus;BP:regulation of salicylic acid mediated signaling pathway;BP:regulation of defense response to fungus;BP:defense response;BP:positive regulation of defense response to bacterium;BP:defens…	------	------	------	------	COG0666	S:Function unknown	BAD94307.1	hypothetical protein [Arabidopsis thaliana]	sp|Q8LPS2|ACD6_ARATH;	Protein ACCELERATED CELL DEATH 6 OS=Arabidopsis thaliana OX=3702 GN=ACD6 PE=1 SV=1;	PF12796.8;PF13962.7;PF13637.7;PF13857.7	Ank_2;PGG;Ank_4;Ank_5	Ankyrin repeats;Domain of unknown function;Ankyrin repeats;Ankyrin repeats
AT3G03840		At3g03840 [Source:UniProtKB/TrEMBL;Acc:Q9SRW1]	5.565	2.4763	1.47129e-05	9.21715e-05	yes	up	0.69	0.38	0.7	3.47	4	4.37	0.59	3.94667	GO:0009733;GO:000367	BP:response to auxin;MF:molecular_function;	K14488	SAUR	map04075	Plant hormone signal transduction	------	------	NP_187034.1	SAUR-like auxin-responsive protein family [Arabidopsis thaliana]	sp|Q9SRW0|SAU28_ARATH;	Auxin-responsive protein SAUR28 OS=Arabidopsis thaliana OX=3702 GN=SAUR28 PE=2 SV=1;	PF02519.15	Auxin_inducible	Auxin responsive protein
AT4G05110	ATENT6	equilibrative nucleoside transporter 6 [Source:TAIR;Acc:AT4G05110]	5.559	2.47491	8.16086e-05	0.000432848	yes	up	0.1	0.2	0.17	0.92	0.94	1.17	0.156667	1.01	GO:0015858;GO:1901642;GO:0016021;GO:0016020;GO:0005886;GO:000533	BP:nucleoside transport;BP:nucleoside transmembrane transport;CC:integral component of membrane;CC:membrane;CC:plasma membrane;MF:nucleoside transmembrane transporter activity;	K15014	SLC29A1_2_3, ENT1_2_3	------	------	ENOG410Y3MT	K:Transcription	NP_001328892.1	equilibrative nucleoside transporter 6 [Arabidopsis thaliana]	sp|Q944N8|ENT6_ARATH;	Equilibrative nucleotide transporter 6 OS=Arabidopsis thaliana OX=3702 GN=ENT6 PE=1 SV=1;	PF01733.19	Nucleoside_tran	Nucleoside transporter
AT3G19710	BCAT4	Methionine aminotransferase BCAT4 [Source:UniProtKB/Swiss-Prot;Acc:Q9LE06]	5.556	2.47411	1.42437e-29	1.24377e-27	yes	up	13.49	12.34	7.49	57.81	100.17	69.25	11.1067	75.7433	GO:0019761;GO:0009611;GO:0009416;GO:0009081;GO:0005737;GO:0005829;GO:0008483;GO:0010326;GO:0003824;GO:0016740;GO:000408	BP:glucosinolate biosynthetic process;BP:response to wounding;BP:response to light stimulus;BP:branched-chain amino acid metabolic process;CC:cytoplasm;CC:cytosol;MF:transaminase activity;MF:methionine-oxo-acid transaminase activity;MF:catalytic activity;MF:transferase activity;MF:branched-chain-amino-acid transaminase activity;	K21346	BCAT4	map00966	Glucosinolate biosynthesis	COG0115	S:Function unknown	NP_188605.1	branched-chain aminotransferase4 [Arabidopsis thaliana]	sp|Q9LE06|BCAT4_ARATH;	Methionine aminotransferase BCAT4 OS=Arabidopsis thaliana OX=3702 GN=BCAT4 PE=1 SV=1;	PF01063.20	Aminotran_4	Amino-transferase class IV
AT5G13220	JAZ10	jasmonate-zim-domain protein 10 [Source:TAIR;Acc:AT5G13220]	5.52	2.46457	1.23954e-11	2.05928e-10	yes	up	3.75	1.57	1.96	7.87	13.75	24.69	2.42667	15.4367	GO:2000022;GO:0009753;GO:0009611;GO:0006952;GO:0031347;GO:0010112;GO:0005634;GO:004280	BP:regulation of jasmonic acid mediated signaling pathway;BP:response to jasmonic acid;BP:response to wounding;BP:defense response;BP:regulation of defense response;BP:regulation of systemic acquired resistance;CC:nucleus;MF:protein homodimerization activity;	K13464	JAZ	map04075	Plant hormone signal transduction	ENOG410Z0XE	S:Function unknown	NP_001330994.1	jasmonate-zim-domain protein 10 [Arabidopsis thaliana]	sp|Q93ZM9|TIF9_ARATH;	Protein TIFY 9 OS=Arabidopsis thaliana OX=3702 GN=TIFY9 PE=1 SV=1;	PF06200.15;PF09425.11	tify;Jas_motif	tify domain;Jas motif
AT1G61890	DTX37	Protein DETOXIFICATION 37 [Source:UniProtKB/Swiss-Prot;Acc:O80695]	5.488	2.45617	1.94789e-10	2.78764e-09	yes	up	6.83	7.08	6.71	24.65	55.01	59.4	6.87333	46.3533	GO:0080167;GO:0055085;GO:0042908;GO:0016021;GO:0016020;GO:0015297;GO:0022857;GO:004291	BP:response to karrikin;BP:transmembrane transport;BP:xenobiotic transport;CC:integral component of membrane;CC:membrane;MF:antiporter activity;MF:transmembrane transporter activity;MF:xenobiotic transporter activity;	K03327	TC.MATE, SLC47A, norM, mdtK, dinF	------	------	COG0534	S:Function unknown	NP_564787.1	MATE efflux family protein [Arabidopsis thaliana]	sp|O80695|DTX37_ARATH;	Protein DETOXIFICATION 37 OS=Arabidopsis thaliana OX=3702 GN=DTX37 PE=2 SV=1;	PF01554.19	MatE	MatE
AT3G63380	ACA12	Calcium-transporting ATPase [Source:UniProtKB/TrEMBL;Acc:A0A178VEV7]	5.483	2.45501	0.00173786	0.00653984	yes	up	0.54	0.07	0.63	2.84	3.54	1.98	0.413333	2.78667	GO:0006811;GO:0070588;GO:0006816;GO:0043231;GO:0016020;GO:0005887;GO:0016021;GO:0046872;GO:0000166;GO:0005516;GO:0005388;GO:0019829;GO:000552	BP:ion transport;BP:calcium ion transmembrane transport;BP:calcium ion transport;CC:intracellular membrane-bounded organelle;CC:membrane;CC:integral component of plasma membrane;CC:integral component of membrane;MF:metal ion binding;MF:nucleotide binding;MF:calmodulin binding;MF:calcium-transporting ATPase activity;MF:cation-transporting ATPase activity;MF:ATP binding;	K01537	ATP2C	------	------	ENOG410XNNC	S:Function unknown	NP_191897.1	ATPase E1-E2 type family protein / haloacid dehalogenase-like hydrolase family protein [Arabidopsis thaliana]	sp|Q9LY77|ACA12_ARATH;	Calcium-transporting ATPase 12, plasma membrane-type OS=Arabidopsis thaliana OX=3702 GN=ACA12 PE=2 SV=1;	PF00689.22;PF00122.21;PF00702.27;PF00690.27;PF13246.7	Cation_ATPase_C;E1-E2_ATPase;Hydrolase;Cation_ATPase_N;Cation_ATPase	Cation transporting ATPase, C-terminus;E1-E2 ATPase;haloacid dehalogenase-like hydrolase;Cation transporter/ATPase, N-terminus;Cation transport ATPase
AT2G23000	SCPL10	Scpl10 [Source:UniProtKB/TrEMBL;Acc:A0A178VYK6]	5.481	2.45443	0.00225124	0.00820336	yes	up	0.14	0.08	0.14	0.67	1.29	0.35	0.12	0.77	GO:0019748;GO:0006508;GO:0005576;GO:0004185;GO:0016740;GO:0016746;GO:001674	BP:secondary metabolic process;BP:proteolysis;CC:extracellular region;MF:serine-type carboxypeptidase activity;MF:transferase activity;MF:transferase activity, transferring acyl groups;MF:transferase activity, transferring acyl groups other than amino-acyl groups;	K16296	SCPL-I	------	------	COG2939	E:Amino acid transport and metabolism	NP_001324624.1	serine carboxypeptidase-like 10 [Arabidopsis thaliana]	sp|O64810|SCP10_ARATH;	Serine carboxypeptidase-like 10 OS=Arabidopsis thaliana OX=3702 GN=SCPL10 PE=2 SV=1;	PF00450.23	Peptidase_S10	Serine carboxypeptidase
AT1G64390	AtGH9C2	Endoglucanase 6 [Source:UniProtKB/Swiss-Prot;Acc:Q42059]	5.464	2.44985	7.77208e-20	3.09171e-18	yes	up	2	0.88	0.98	10.22	7.66	7.9	1.28667	8.59333	GO:0005975;GO:0030245;GO:0000272;GO:0071555;GO:0008152;GO:0005576;GO:0016787;GO:0008810;GO:0030246;GO:0016798;GO:000455	BP:carbohydrate metabolic process;BP:cellulose catabolic process;BP:polysaccharide catabolic process;BP:cell wall organization;BP:metabolic process;CC:extracellular region;MF:hydrolase activity;MF:cellulase activity;MF:carbohydrate binding;MF:hydrolase activity, acting on glycosyl bonds;MF:hydrolase activity, hydrolyzing O-glycosyl compounds;	K01179	E3.2.1.4	map00500	Starch and sucrose metabolism	ENOG410XPC9	G:Carbohydrate transport and metabolism	NP_176621.1	glycosyl hydrolase 9C2 [Arabidopsis thaliana]	sp|Q42059|GUN6_ARATH;	Endoglucanase 6 OS=Arabidopsis thaliana OX=3702 GN=At1g64390 PE=2 SV=2;	PF00759.20;PF09478.11	Glyco_hydro_9;CBM49	Glycosyl hydrolase family 9;Carbohydrate binding domain CBM49
AT4G37450	AGP18	arabinogalactan protein 18 [Source:TAIR;Acc:AT4G37450]	5.455	2.4476	8.08255e-24	4.83625e-22	yes	up	8.49	4.48	4.12	40.09	29.95	43.07	5.69667	37.7033	GO:0009554;GO:0031225;GO:0016021;GO:0016020;GO:000588	BP:megasporogenesis;CC:anchored component of membrane;CC:integral component of membrane;CC:membrane;CC:plasma membrane;	------	------	------	------	ENOG41119DP;ENOG41104ZI	S:Function unknown;U:Intracellular trafficking, secretion, and vesicular transport	NP_001329215.1	arabinogalactan protein 18 [Arabidopsis thaliana]	sp|Q9FPR2|AGP18_ARATH;	Lysine-rich arabinogalactan protein 18 OS=Arabidopsis thaliana OX=3702 GN=AGP18 PE=2 SV=1;	------	------	------
AT5G65600	LECRK92	L-type lectin-domain containing receptor kinase IX.2 [Source:UniProtKB/Swiss-Prot;Acc:Q9LSL5]	5.453	2.44713	2.26087e-08	2.3656e-07	yes	up	0.46	0.23	0.34	1.5	3.56	1.83	0.343333	2.29667	GO:0016310;GO:0042742;GO:0010942;GO:0106311;GO:0106310;GO:0009862;GO:0010726;GO:0002229;GO:0006468;GO:1902479;GO:0006952;GO:0007178;GO:1900426;GO:0140426;GO:0016021;GO:0016020;GO:0005886;GO:0030246;GO:0004675;GO:0000166;GO:0004674;GO:0016740;GO:0004672;GO:0005524;GO:0016301;GO:000551	BP:phosphorylation;BP:defense response to bacterium;BP:positive regulation of cell death;BP:old GO;BP:old GO;BP:systemic acquired resistance, salicylic acid mediated signaling pathway;BP:positive regulation of hydrogen peroxide metabolic process;BP:defense response to oomycetes;BP:protein phosphorylation;BP:positive regulation of defense response to bacterium, incompatible interaction;BP:defense …	------	------	------	------	COG0515	S:Function unknown	NP_201363.1	Concanavalin A-like lectin protein kinase family protein [Arabidopsis thaliana]	sp|Q9LSL5|LRK92_ARATH;	L-type lectin-domain containing receptor kinase IX.2 OS=Arabidopsis thaliana OX=3702 GN=LECRK92 PE=1 SV=1;	PF00139.20;PF00069.26;PF07714.18;PF03388.14;PF17667.2	Lectin_legB;Pkinase;PK_Tyr_Ser-Thr;Lectin_leg-like;Pkinase_fungal	Legume lectin domain;Protein kinase domain;Protein tyrosine and serine/threonine kinase;Legume-like lectin family;Fungal protein kinase
AT1G72940		At1g72940/F3N23_14 [Source:UniProtKB/TrEMBL;Acc:Q9SSN2]	5.442	2.44402	5.16927e-30	4.74535e-28	yes	up	7.65	8.02	14.18	65.8	53.1	76.84	9.95	65.2467	GO:0006952;GO:0007165;GO:0071456;GO:0016021;GO:0005789;GO:0016787;GO:0043531;GO:0003924;GO:0061809;GO:0000166;GO:0050135;GO:0005515;GO:0003953;GO:0005524;GO:000552	BP:defense response;BP:signal transduction;BP:cellular response to hypoxia;CC:integral component of membrane;CC:endoplasmic reticulum membrane;MF:hydrolase activity;MF:ADP binding;MF:GTPase activity;MF:NAD+ nucleotidase, cyclic ADP-ribose generating;MF:nucleotide binding;MF:NA;MF:protein binding;MF:NAD+ nucleosidase activity;MF:ATP binding;MF:GTP binding;	------	------	------	------	------	------	NP_177437.1	Toll-Interleukin-Resistance (TIR) domain-containing protein [Arabidopsis thaliana]	sp|Q9SSN3|TIR_ARATH;	Toll/interleukin-1 receptor-like protein OS=Arabidopsis thaliana OX=3702 GN=TIR PE=1 SV=1;	PF01582.21;PF13676.7;PF00931.23	TIR;TIR_2;NB-ARC	TIR domain;TIR domain;NB-ARC domain
AT1G30700		Berberine bridge enzyme-like 8 [Source:UniProtKB/Swiss-Prot;Acc:Q9SA85]	5.44	2.44369	0.000483571	0.00211087	yes	up	2.38	3.43	6.05	21.2	47.18	11.66	3.95333	26.68	GO:0055114;GO:0005618;GO:0005576;GO:0050660;GO:0000166;GO:0071949;GO:001649	BP:oxidation-reduction process;CC:cell wall;CC:extracellular region;MF:flavin adenine dinucleotide binding;MF:nucleotide binding;MF:FAD binding;MF:oxidoreductase activity;	------	------	------	------	COG0277	S:Function unknown	NP_174357.1	FAD-binding Berberine family protein [Arabidopsis thaliana]	sp|Q9SA85|BBE8_ARATH;	Berberine bridge enzyme-like 8 OS=Arabidopsis thaliana OX=3702 GN=At1g30700 PE=2 SV=1;	PF01565.24;PF08031.13	FAD_binding_4;BBE	FAD binding domain;Berberine and berberine like
AT3G12170		Chaperone DnaJ-domain superfamily protein [Source:UniProtKB/TrEMBL;Acc:A0A1I9LLP0]	5.433	2.44187	3.18222e-06	2.28331e-05	yes	up	0.52	0.54	0.23	2.5	3.38	2.79	0.43	2.89	GO:0016192;GO:001602	BP:vesicle-mediated transport;CC:integral component of membrane;	K09529	DNAJC9	------	------	COG2214;COG0484	S:Function unknown;	NP_001325582.1	Chaperone DnaJ-domain superfamily protein [Arabidopsis thaliana]	sp|Q9FL54|DNAJ6_ARATH;	Chaperone protein dnaJ 6 OS=Arabidopsis thaliana OX=3702 GN=ATJ6 PE=2 SV=1;	PF00226.32	DnaJ	DnaJ domain
AT3G50890	ZHD7	ZHD7 [Source:UniProtKB/TrEMBL;Acc:A0A178VL56]	5.4	2.433	8.72919e-08	8.2459e-07	yes	up	0.84	0.4	0.33	3.47	3.99	2.89	0.523333	3.45	GO:0006355;GO:0005634;GO:0003700;GO:0000976;GO:0005515;GO:0003677;GO:0046872;GO:004280	BP:regulation of transcription, DNA-templated;CC:nucleus;MF:transcription factor activity, sequence-specific DNA binding;MF:transcription regulatory region sequence-specific DNA binding;MF:protein binding;MF:DNA binding;MF:metal ion binding;MF:protein homodimerization activity;	------	------	------	------	ENOG4110838	S:Function unknown	NP_190658.1	homeobox protein 28 [Arabidopsis thaliana]	sp|Q9SVL0|ZHD7_ARATH;	Zinc-finger homeodomain protein 7 OS=Arabidopsis thaliana OX=3702 GN=ZHD7 PE=1 SV=1;	PF04770.13	ZF-HD_dimer	ZF-HD protein dimerisation region
AT2G38470	WRKY33	WRKY33 [Source:UniProtKB/TrEMBL;Acc:A0A384L4W4]	5.393	2.43107	3.68654e-09	4.36793e-08	yes	up	33.19	39.46	73.46	319.18	391.61	263.39	48.7033	324.727	GO:0034605;GO:0010120;GO:0042742;GO:0009414;GO:0009651;GO:0010508;GO:0050832;GO:0006970;GO:0009409;GO:0009408;GO:0006952;GO:0010200;GO:0009627;GO:0006355;GO:0070370;GO:0005634;GO:0003677;GO:0043565;GO:0046872;GO:0044212;GO:0003700;GO:0000976;GO:000551	BP:cellular response to heat;BP:camalexin biosynthetic process;BP:defense response to bacterium;BP:response to water deprivation;BP:response to salt stress;BP:positive regulation of autophagy;BP:defense response to fungus;BP:response to osmotic stress;BP:response to cold;BP:response to heat;BP:defense response;BP:response to chitin;BP:systemic acquired resistance;BP:regulation of transcription, D…	K13424	WRKY33	map04016;map04626	MAPK signaling pathway - plant;Plant-pathogen interaction	ENOG4112BTF	S:Function unknown	NP_181381.2	WRKY DNA-binding protein 33 [Arabidopsis thaliana]	sp|Q8S8P5|WRK33_ARATH;	Probable WRKY transcription factor 33 OS=Arabidopsis thaliana OX=3702 GN=WRKY33 PE=1 SV=2;	PF03106.16	WRKY	WRKY DNA -binding domain
AT2G46650	CYTB5-C	Cytochrome B5 isoform C [Source:UniProtKB/Swiss-Prot;Acc:Q9ZNV4]	5.387	2.42936	4.17037e-40	6.68535e-38	yes	up	11.3	8.26	6.73	52.1	67.56	53	8.76333	57.5533	GO:0022900;GO:0055114;GO:0043231;GO:0005783;GO:0005829;GO:0016020;GO:0005789;GO:0016021;GO:0020037;GO:0046872;GO:000905	BP:electron transport chain;BP:oxidation-reduction process;CC:intracellular membrane-bounded organelle;CC:endoplasmic reticulum;CC:cytosol;CC:membrane;CC:endoplasmic reticulum membrane;CC:integral component of membrane;MF:heme binding;MF:metal ion binding;MF:electron carrier activity;	K23490	CYB5	------	------	COG5274	S:Function unknown	BAD43205.1	putative cytochrome b5, partial [Arabidopsis thaliana]	sp|Q9ZNV4|CYB5C_ARATH;	Cytochrome B5 isoform C OS=Arabidopsis thaliana OX=3702 GN=CYTB5-C PE=1 SV=1;	PF00173.29	Cyt-b5	Cytochrome b5-like Heme/Steroid binding domain
AT3G15356	LEC	Lectin-like protein LEC [Source:UniProtKB/Swiss-Prot;Acc:Q9LJR2]	5.377	2.4268	3.99682e-54	1.30085e-51	yes	up	35	34.53	25.68	180.71	258.93	187.06	31.7367	208.9	GO:0010200;GO:0009817;GO:0009611;GO:0071369;GO:0006952;GO:0071323;GO:0050832;GO:0009873;GO:0002239;GO:0071395;GO:0048046;GO:0005618;GO:0005829;GO:0005576;GO:0005634;GO:003024	BP:response to chitin;BP:defense response to fungus, incompatible interaction;BP:response to wounding;BP:cellular response to ethylene stimulus;BP:defense response;BP:cellular response to chitin;BP:defense response to fungus;BP:ethylene-activated signaling pathway;BP:response to oomycetes;BP:cellular response to jasmonic acid stimulus;CC:apoplast;CC:cell wall;CC:cytosol;CC:extracellular region;CC…	------	------	------	------	ENOG411192G	S:Function unknown	NP_683568.1	Legume lectin family protein [Arabidopsis thaliana]	sp|Q9LJR2|LECT2_ARATH;	Lectin-like protein LEC OS=Arabidopsis thaliana OX=3702 GN=LEC PE=1 SV=1;	PF00139.20	Lectin_legB	Legume lectin domain
AT2G18680		unknown protein; FUNCTIONS IN: molecular_function unknown; INVOLVED IN: biological_process unknown; LOCATED IN: endomembrane system; EXPRESSED IN: male gametophyte, pollen tube; EXPRESSED DURING: L mature pollen stage, M germinated pollen stage; BES /.../idopsis thaliana protein match is: unknown protein (TAIR:AT2G18690.1); Ha. [Source:TAIR;Acc:AT2G18680]	5.372	2.42544	0.00113637	0.00451542	yes	up	1	2.31	2.5	7.1	25.01	6.63	1.93667	12.9133	GO:0008150;GO:0016021;GO:0016020;GO:000578	BP:biological_process;CC:integral component of membrane;CC:membrane;CC:endoplasmic reticulum;	------	------	------	------	ENOG410Z9KI	S:Function unknown	OAP07433.1	hypothetical protein AXX17_AT2G14020 [Arabidopsis thaliana]	------	------	------	------	------
AT5G05300		Gb [Source:UniProtKB/TrEMBL;Acc:Q9FLC4]	5.366	2.42381	0.000268507	0.00125333	yes	up	0.19	0.63	1.05	3.93	6.24	2.13	0.623333	4.1	GO:0009651;GO:0045088;GO:0042742;GO:0042542;GO:001602	BP:response to salt stress;BP:regulation of innate immune response;BP:defense response to bacterium;BP:response to hydrogen peroxide;CC:integral component of membrane;	------	------	------	------	------	------	NP_001318482.1	hypothetical protein AT5G05300 [Arabidopsis thaliana]	------	------	------	------	------
AT4G38820		At4g38820 [Source:UniProtKB/TrEMBL;Acc:Q9T0J0]	5.361	2.42244	0.000268013	0.00125156	yes	up	0	5.61	2.73	20.95	16.76	15.3	2.78	17.67	GO:0009733;GO:000815	BP:response to auxin;BP:biological_process;	K14488	SAUR	map04075	Plant hormone signal transduction	ENOG4111DHX	S:Function unknown	NP_001119142.1	SAUR-like auxin-responsive protein family [Arabidopsis thaliana]	sp|Q9FJF9|SAU21_ARATH;	Auxin-responsive protein SAUR21 OS=Arabidopsis thaliana OX=3702 GN=SAUR21 PE=2 SV=1;	------	------	------
AT4G11290	PER39	Peroxidase 39 [Source:UniProtKB/Swiss-Prot;Acc:Q9SUT2]	5.34	2.41673	2.71775e-11	4.35672e-10	yes	up	2.56	2.49	0.62	13.86	10.76	12.48	1.89	12.3667	GO:0098869;GO:0042744;GO:0055114;GO:0006979;GO:0099503;GO:0005773;GO:0005576;GO:0009505;GO:0009506;GO:0020037;GO:0004601;GO:0046872;GO:001649	BP:cellular oxidant detoxification;BP:hydrogen peroxide catabolic process;BP:oxidation-reduction process;BP:response to oxidative stress;CC:secretory vesicle;CC:vacuole;CC:extracellular region;CC:plant-type cell wall;CC:plasmodesma;MF:heme binding;MF:peroxidase activity;MF:metal ion binding;MF:oxidoreductase activity;	K00430	E1.11.1.7	map00940	Phenylpropanoid biosynthesis	ENOG410Y9ME	S:Function unknown	NP_192868.1	Peroxidase superfamily protein [Arabidopsis thaliana]	sp|Q9SUT2|PER39_ARATH;	Peroxidase 39 OS=Arabidopsis thaliana OX=3702 GN=PER39 PE=1 SV=1;	PF00141.24	peroxidase	Peroxidase
AT5G49330	MYB111	Transcription factor MYB111 [Source:UniProtKB/Swiss-Prot;Acc:Q9FJ07]	5.336	2.41584	0.00654274	0.0207568	yes	up	0.07	0.1	0.14	1.15	0.58	0.28	0.103333	0.67	GO:0051555;GO:1900386;GO:0030154;GO:0006355;GO:0009416;GO:0010224;GO:0005634;GO:0043565;GO:0044212;GO:0003700;GO:0005515;GO:000367	BP:flavonol biosynthetic process;BP:positive regulation of flavonol biosynthetic process;BP:cell differentiation;BP:regulation of transcription, DNA-templated;BP:response to light stimulus;BP:response to UV-B;CC:nucleus;MF:sequence-specific DNA binding;MF:transcription regulatory region DNA binding;MF:transcription factor activity, sequence-specific DNA binding;MF:protein binding;MF:DNA binding;	K09422	MYBP	------	------	COG5147	S:Function unknown	NP_199744.1	myb domain protein 111 [Arabidopsis thaliana]	sp|Q9FJ07|MY111_ARATH;	Transcription factor MYB111 OS=Arabidopsis thaliana OX=3702 GN=MYB111 PE=1 SV=1;	PF00249.32;PF13921.7	Myb_DNA-binding;Myb_DNA-bind_6	Myb-like DNA-binding domain;Myb-like DNA-binding domain
AT2G35980	NHL10	NDR1/HIN1-like protein 10 [Source:UniProtKB/Swiss-Prot;Acc:Q9SJ52]	5.298	2.40547	4.71645e-07	3.96533e-06	yes	up	0.71	1.93	2.89	7.87	20.92	7.46	1.84333	12.0833	GO:0010150;GO:0051607;GO:0006952;GO:0051707;GO:0016021;GO:0016020;GO:0046658;GO:0005886;GO:0009506;GO:000950	BP:leaf senescence;BP:defense response to virus;BP:defense response;BP:response to other organism;CC:integral component of membrane;CC:membrane;CC:anchored component of plasma membrane;CC:plasma membrane;CC:plasmodesma;CC:chloroplast;	------	------	------	------	ENOG410YGQV	S:Function unknown	NP_181142.1	Late embryogenesis abundant (LEA) hydroxyproline-rich glycoprotein family [Arabidopsis thaliana]	sp|Q9SJ52|NHL10_ARATH;	NDR1/HIN1-like protein 10 OS=Arabidopsis thaliana OX=3702 GN=NHL10 PE=2 SV=1;	PF03168.14	LEA_2	Late embryogenesis abundant protein
AT3G51450	SSL7	Protein STRICTOSIDINE SYNTHASE-LIKE 7 [Source:UniProtKB/Swiss-Prot;Acc:Q9SD04]	5.286	2.4022	2.12122e-09	2.61723e-08	yes	up	2.3	0.76	1.27	5.07	11.96	10.94	1.44333	9.32333	GO:0009751;GO:0009753;GO:0009615;GO:0009611;GO:0009723;GO:0009058;GO:0009620;GO:0005783;GO:0005773;GO:0005829;GO:0016021;GO:001684	BP:response to salicylic acid;BP:response to jasmonic acid;BP:response to virus;BP:response to wounding;BP:response to ethylene;BP:biosynthetic process;BP:response to fungus;CC:endoplasmic reticulum;CC:vacuole;CC:cytosol;CC:integral component of membrane;MF:strictosidine synthase activity;	------	------	------	------	COG3386	G:Carbohydrate transport and metabolism	NP_190713.1	Calcium-dependent phosphotriesterase superfamily protein [Arabidopsis thaliana]	sp|Q9SD04|SSL7_ARATH;	Protein STRICTOSIDINE SYNTHASE-LIKE 7 OS=Arabidopsis thaliana OX=3702 GN=SSL7 PE=2 SV=1;	PF03088.17;PF08450.13	Str_synth;SGL	Strictosidine synthase;SMP-30/Gluconolactonase/LRE-like region
AT5G56985		-	5.272	2.3983	3.86152e-06	2.72322e-05	yes	up	5.18	0.84	5.77	18.65	23.48	29.51	3.93	23.88	GO:0009617;GO:0042742;GO:0009753;GO:0009611;GO:001602	BP:response to bacterium;BP:defense response to bacterium;BP:response to jasmonic acid;BP:response to wounding;CC:integral component of membrane;	------	------	------	------	ENOG410Z9QH	S:Function unknown	NP_001330463.1	hypothetical protein AT5G56985 [Arabidopsis thaliana]	sp|F4K956|A70_ARATH;	Pathogen-associated molecular patterns-induced protein A70 OS=Arabidopsis thaliana OX=3702 GN=A70 PE=1 SV=1;	------	------	------
AT2G38090		Duplicated homeodomain-like superfamily protein [Source:UniProtKB/TrEMBL;Acc:Q8GXN7]	5.266	2.39673	7.4839e-10	9.90007e-09	yes	up	0.57	0.49	0.29	3.38	2.24	3.1	0.45	2.90667	GO:0006355;GO:0005634;GO:0044212;GO:0003700;GO:0000976;GO:000367	BP:regulation of transcription, DNA-templated;CC:nucleus;MF:transcription regulatory region DNA binding;MF:transcription factor activity, sequence-specific DNA binding;MF:transcription regulatory region sequence-specific DNA binding;MF:DNA binding;	------	------	------	------	COG5269	G:Carbohydrate transport and metabolism	NP_181344.2	Duplicated homeodomain-like superfamily protein [Arabidopsis thaliana]	sp|Q8S9H7|DIV_ANTMA;	Transcription factor DIVARICATA OS=Antirrhinum majus OX=4151 GN=DIVARICATA PE=2 SV=1;	PF00249.32;PF13921.7	Myb_DNA-binding;Myb_DNA-bind_6	Myb-like DNA-binding domain;Myb-like DNA-binding domain
AT3G43960	RDL3	Probable cysteine protease RDL3 [Source:UniProtKB/Swiss-Prot;Acc:Q9LXW3]	5.262	2.39551	2.41126e-09	2.94967e-08	yes	up	0.83	0.53	0.32	3.75	3.66	3.44	0.56	3.61667	GO:0048767;GO:0051603;GO:0006508;GO:0005615;GO:0016021;GO:0005764;GO:0031225;GO:0016787;GO:0004197;GO:0008233;GO:000823	BP:root hair elongation;BP:proteolysis involved in cellular protein catabolic process;BP:proteolysis;CC:extracellular space;CC:integral component of membrane;CC:lysosome;CC:anchored component of membrane;MF:hydrolase activity;MF:cysteine-type endopeptidase activity;MF:peptidase activity;MF:cysteine-type peptidase activity;	------	------	------	------	COG4870	S:Function unknown	NP_566867.1	Cysteine proteinases superfamily protein [Arabidopsis thaliana]	sp|Q9LXW3|RDL3_ARATH;	Probable cysteine protease RDL3 OS=Arabidopsis thaliana OX=3702 GN=RDL3 PE=2 SV=1;	PF00112.24;PF08246.13	Peptidase_C1;Inhibitor_I29	Papain family cysteine protease;Cathepsin propeptide inhibitor domain
AT3G10290		Probable sugar phosphate/phosphate translocator At3g10290 [Source:UniProtKB/Swiss-Prot;Acc:Q9SS40]	5.24	2.38958	0.0115648	0.0338129	yes	up	0.14	0.22	0	0.88	0.93	0.51	0.12	0.773333	GO:0008643;GO:0055085;GO:0005794;GO:0016021;GO:0016020;GO:0015297;GO:0022857;GO:001516	BP:carbohydrate transport;BP:transmembrane transport;CC:Golgi apparatus;CC:integral component of membrane;CC:membrane;MF:antiporter activity;MF:transmembrane transporter activity;MF:pyrimidine nucleotide-sugar transmembrane transporter activity;	------	------	------	------	ENOG410XP1S	Q:Secondary metabolites biosynthesis, transport and catabolism	NP_187640.1	Nucleotide-sugar transporter family protein [Arabidopsis thaliana]	sp|Q9SS40|PT310_ARATH;	Probable sugar phosphate/phosphate translocator At3g10290 OS=Arabidopsis thaliana OX=3702 GN=At3g10290 PE=3 SV=1;	PF03151.17;PF08449.12;PF00892.21	TPT;UAA;EamA	Triose-phosphate Transporter family;UAA transporter family;EamA-like transporter family
AT5G24660	LSU2	Protein RESPONSE TO LOW SULFUR 2 [Source:UniProtKB/Swiss-Prot;Acc:Q9FIR9]	5.221	2.38443	6.19124e-11	9.39223e-10	yes	up	1.32	1.51	1.51	8.03	7.92	11.5	1.44667	9.15	GO:0009658;GO:0047484;GO:0048587;GO:0006952;GO:0010438;GO:0045893;GO:0002229;GO:0098869;GO:0009651;GO:0009909;GO:0031347;GO:0042742;GO:000551	BP:chloroplast organization;BP:regulation of response to osmotic stress;BP:regulation of short-day photoperiodism, flowering;BP:defense response;BP:cellular response to sulfur starvation;BP:positive regulation of transcription, DNA-templated;BP:defense response to oomycetes;BP:cellular oxidant detoxification;BP:response to salt stress;BP:regulation of flower development;BP:regulation of defense r…	------	------	------	------	ENOG410ZF0Z	S:Function unknown	NP_197854.1	response to low sulfur 2 [Arabidopsis thaliana]	sp|Q9FIR9|LSU2_ARATH;	Protein RESPONSE TO LOW SULFUR 2 OS=Arabidopsis thaliana OX=3702 GN=LSU2 PE=2 SV=1;	------	------	------
AT4G10390		Probable receptor-like protein kinase At4g10390 [Source:UniProtKB/Swiss-Prot;Acc:Q9SV83]	5.188	2.3751	4.53407e-05	0.000254232	yes	up	0.31	0.18	0.13	1.1	1.08	1.72	0.206667	1.3	GO:0006468;GO:0016310;GO:0009611;GO:0005886;GO:0016301;GO:0004672;GO:0000166;GO:0004675;GO:0004674;GO:0016740;GO:0106311;GO:0005524;GO:010631	BP:protein phosphorylation;BP:phosphorylation;BP:response to wounding;CC:plasma membrane;MF:kinase activity;MF:protein kinase activity;MF:nucleotide binding;MF:transmembrane receptor protein serine/threonine kinase activity;MF:protein serine/threonine kinase activity;MF:transferase activity;MF:old GO;MF:ATP binding;MF:old GO;	------	------	------	------	COG0515	U:Intracellular trafficking, secretion, and vesicular transport	NP_192777.1	Protein kinase superfamily protein [Arabidopsis thaliana]	sp|Q9SV83|Y4103_ARATH;	Probable receptor-like protein kinase At4g10390 OS=Arabidopsis thaliana OX=3702 GN=At4g10390 PE=2 SV=1;	PF00069.26;PF07714.18;PF14531.7;PF01636.24	Pkinase;PK_Tyr_Ser-Thr;Kinase-like;APH	Protein kinase domain;Protein tyrosine and serine/threonine kinase;Kinase-like;Phosphotransferase enzyme family
AT5G49850	JAL46	Jacalin-related lectin 46 [Source:UniProtKB/Swiss-Prot;Acc:Q9LTA8]	5.173	2.37089	0.000478596	0.00209128	yes	up	0.17	0.08	0.04	0.64	0.62	0.63	0.0966667	0.63	GO:003024	MF:carbohydrate binding;	------	------	------	------	------	------	NP_199796.1	Mannose-binding lectin superfamily protein [Arabidopsis thaliana]	sp|Q9LTA8|JAL46_ARATH;	Jacalin-related lectin 46 OS=Arabidopsis thaliana OX=3702 GN=JAL46 PE=2 SV=1;	PF01419.18	Jacalin	Jacalin-like lectin domain
AT4G12880	ENODL19	At4g12880 [Source:UniProtKB/TrEMBL;Acc:Q9STZ8]	5.148	2.36395	3.77946e-21	1.7056e-19	yes	up	10.39	7.65	5.18	54.25	35.13	53.78	7.74	47.72	GO:0022900;GO:0048046;GO:0046658;GO:000905	BP:electron transport chain;CC:apoplast;CC:anchored component of plasma membrane;MF:electron carrier activity;	------	------	------	------	ENOG410YM9R;ENOG410ZMPK	S:Function unknown;	NP_193024.1	early nodulin-like protein 19 [Arabidopsis thaliana]	sp|Q39131|LAML_ARATH;	Lamin-like protein OS=Arabidopsis thaliana OX=3702 GN=At5g15350 PE=2 SV=1;	PF02298.18	Cu_bind_like	Plastocyanin-like domain
AT2G35860	FLA16	FLA16 [Source:UniProtKB/TrEMBL;Acc:A0A178VR39]	5.14	2.36178	4.73296e-14	1.02799e-12	yes	up	3.01	1.48	1	13.78	9.71	10.91	1.83	11.4667	GO:000557	CC:extracellular region;	------	------	------	------	COG2335	M:Cell wall/membrane/envelope biogenesis	NP_850253.1	FASCICLIN-like arabinogalactan protein 16 precursor [Arabidopsis thaliana]	sp|Q8RWC5|FLA16_ARATH;	Fasciclin-like arabinogalactan protein 16 OS=Arabidopsis thaliana OX=3702 GN=FLA16 PE=2 SV=1;	PF02469.23	Fasciclin	Fasciclin domain
AT4G01950	ATGPAT3	glycerol-3-phosphate acyltransferase 3 [Source:TAIR;Acc:AT4G01950]	5.127	2.35806	1.19058e-27	9.26626e-26	yes	up	2.78	1.64	1.81	11.56	14.87	12.71	2.07667	13.0467	GO:0016024;GO:0010143;GO:0016021;GO:0016020;GO:0004366;GO:0016791;GO:0102420;GO:0090447;GO:0016740;GO:001674	BP:CDP-diacylglycerol biosynthetic process;BP:cutin biosynthetic process;CC:integral component of membrane;CC:membrane;MF:glycerol-3-phosphate O-acyltransferase activity;MF:phosphatase activity;MF:sn-1-glycerol-3-phosphate C1;MF:glycerol-3-phosphate 2-O-acyltransferase activity;MF:transferase activity;MF:transferase activity, transferring acyl groups;	K13508	GPAT	map00564;map00561	Glycerophospholipid metabolism;Glycerolipid metabolism	ENOG410YBBE	I:Lipid transport and metabolism	NP_001329010.1	glycerol-3-phosphate acyltransferase 3 [Arabidopsis thaliana]	sp|Q9SYJ2|GPAT3_ARATH;	Probable glycerol-3-phosphate acyltransferase 3 OS=Arabidopsis thaliana OX=3702 GN=GPAT3 PE=2 SV=1;	PF01553.22	Acyltransferase	Acyltransferase
AT2G43000	JUB1	Transcription factor JUNGBRUNNEN 1 [Source:UniProtKB/Swiss-Prot;Acc:Q9SK55]	5.109	2.35313	1.63296e-06	1.24389e-05	yes	up	0.6	1.03	1.22	3.77	10.09	3.99	0.95	5.95	GO:0009718;GO:0042538;GO:0006561;GO:0010150;GO:0005992;GO:1900056;GO:0010120;GO:0006355;GO:0005634;GO:0003700;GO:000367	BP:anthocyanin-containing compound biosynthetic process;BP:hyperosmotic salinity response;BP:proline biosynthetic process;BP:leaf senescence;BP:trehalose biosynthetic process;BP:negative regulation of leaf senescence;BP:camalexin biosynthetic process;BP:regulation of transcription, DNA-templated;CC:nucleus;MF:transcription factor activity, sequence-specific DNA binding;MF:DNA binding;	------	------	------	------	ENOG410YFHY	K:Transcription	NP_181828.1	NAC domain containing protein 42 [Arabidopsis thaliana]	sp|Q9SK55|NAC42_ARATH;	Transcription factor JUNGBRUNNEN 1 OS=Arabidopsis thaliana OX=3702 GN=JUB1 PE=1 SV=1;	PF02365.16	NAM	No apical meristem
AT4G07275		-	5.097	2.34954	0.00253447	0.00912553	yes	up	2.24	0.83	3.78	14.56	10.56	11.35	2.28333	12.1567	GO:0009555;GO:0071555;GO:0010025;GO:0042761;GO:0005783;GO:0005634;GO:001674	BP:pollen development;BP:cell wall organization;BP:wax biosynthetic process;BP:very long-chain fatty acid biosynthetic process;CC:endoplasmic reticulum;CC:nucleus;MF:transferase activity, transferring acyl groups other than amino-acyl groups;	------	------	------	------	ENOG410YCVD	S:Function unknown	CAA0396365.1	unnamed protein product [Arabidopsis thaliana]	sp|Q39048|CER2_ARATH;	Protein ECERIFERUM 2 OS=Arabidopsis thaliana OX=3702 GN=CER2 PE=1 SV=1;	------	------	------
AT2G22920	SCPL12	Serine carboxypeptidase-like 12 [Source:UniProtKB/Swiss-Prot;Acc:O81009]	5.095	2.34908	0.0175369	0.0478848	yes	up	0.11	0.11	0.03	0.41	0.66	0.53	0.0833333	0.533333	GO:0019748;GO:0006508;GO:0005576;GO:0016787;GO:0004180;GO:0004185;GO:0016747;GO:000823	BP:secondary metabolic process;BP:proteolysis;CC:extracellular region;MF:hydrolase activity;MF:carboxypeptidase activity;MF:serine-type carboxypeptidase activity;MF:transferase activity, transferring acyl groups other than amino-acyl groups;MF:peptidase activity;	K16296	SCPL-I	------	------	COG2939	E:Amino acid transport and metabolism	NP_179876.1	serine carboxypeptidase-like 12 [Arabidopsis thaliana]	sp|O81009|SCP12_ARATH;	Serine carboxypeptidase-like 12 OS=Arabidopsis thaliana OX=3702 GN=SCPL12 PE=2 SV=1;	PF00450.23	Peptidase_S10	Serine carboxypeptidase
AT4G21990	APR3	5'-adenylylsulfate reductase 3, chloroplastic [Source:UniProtKB/Swiss-Prot;Acc:P92980]	5.092	2.34836	3.94998e-95	7.71359e-92	yes	up	25.97	22.84	22.47	142.9	171.01	132.78	23.76	148.897	GO:0008652;GO:0019419;GO:0019344;GO:0045454;GO:0000103;GO:0055114;GO:0009536;GO:0005623;GO:0009507;GO:0051539;GO:0046872;GO:0051536;GO:0033741;GO:0009973;GO:0003824;GO:0016671;GO:001649	BP:cellular amino acid biosynthetic process;BP:sulfate reduction;BP:cysteine biosynthetic process;BP:cell redox homeostasis;BP:sulfate assimilation;BP:oxidation-reduction process;CC:plastid;CC:cell;CC:chloroplast;MF:4 iron, 4 sulfur cluster binding;MF:metal ion binding;MF:iron-sulfur cluster binding;MF:adenylyl-sulfate reductas;MF:adenylyl-sulfate reductase activity;MF:catalytic activity;MF:oxido…	K05907	APR	map00920	Sulfur metabolism	COG0175	U:Intracellular trafficking, secretion, and vesicular transport	NP_193930.1	APS reductase 3 [Arabidopsis thaliana]	sp|P92980|APR3_ARATH;	5'-adenylylsulfate reductase 3, chloroplastic OS=Arabidopsis thaliana OX=3702 GN=APR3 PE=2 SV=2;	PF01507.20;PF00085.21;PF13098.7	PAPS_reduct;Thioredoxin;Thioredoxin_2	Phosphoadenosine phosphosulfate reductase family;Thioredoxin;Thioredoxin-like domain
AT3G15518		Putative uncharacterized protein [Source:UniProtKB/TrEMBL;Acc:Q8GYA5]	5.089	2.34738	0.00169095	0.00638708	yes	up	0.92	2.28	0.36	3.68	16.58	2.64	1.18667	7.63333	GO:0008150;GO:0009535;GO:0009534;GO:0005829;GO:0031977;GO:0009543;GO:0009579;GO:0009507;GO:0003755;GO:000367	BP:biological_process;CC:chloroplast thylakoid membrane;CC:chloroplast thylakoid;CC:cytosol;CC:thylakoid lumen;CC:chloroplast thylakoid lumen;CC:thylakoid;CC:chloroplast;MF:peptidyl-prolyl cis-trans isomerase activity;MF:molecular_function;	------	------	------	------	ENOG41119QU	S:Function unknown	AAF35418.1	hypothetical protein [Arabidopsis thaliana]	------	------	------	------	------
AT5G13060	ABAP1	ARMADILLO BTB ARABIDOPSIS PROTEIN 1 [Source:UniProtKB/Swiss-Prot;Acc:B7U179]	5.089	2.34734	3.04343e-08	3.10575e-07	yes	up	0.45	0.16	0.26	2.02	1.6	1.85	0.29	1.82333	GO:0042127;GO:0008285;GO:2000104;GO:0016567;GO:0006261;GO:0005634;GO:0031261;GO:000551	BP:regulation of cell proliferation;BP:negative regulation of cell proliferation;BP:negative regulation of DNA-dependent DNA replication;BP:protein ubiquitination;BP:DNA-dependent DNA replication;CC:nucleus;CC:DNA replication preinitiation complex;MF:protein binding;	------	------	------	------	ENOG410XRDX	S:Function unknown	NP_196810.5	ARMADILLO BTB protein 1 [Arabidopsis thaliana]	sp|B7U179|ABAP1_ARATH;	ARMADILLO BTB ARABIDOPSIS PROTEIN 1 OS=Arabidopsis thaliana OX=3702 GN=ABAP1 PE=1 SV=1;	PF00514.24;PF00651.32;PF13646.7;PF13513.7;PF03224.15	Arm;BTB;HEAT_2;HEAT_EZ;V-ATPase_H_N	Armadillo/beta-catenin-like repeat;BTB/POZ domain;HEAT repeats;HEAT-like repeat;V-ATPase subunit H
AT3G05600		Alpha/beta-Hydrolases superfamily protein [Source:UniProtKB/TrEMBL;Acc:Q9M9W5]	5.088	2.34723	4.57955e-13	8.84652e-12	yes	up	0.91	0.99	1.25	6.11	5.12	8.59	1.05	6.60667	GO:0010143;GO:0005829;GO:0004301;GO:0003824;GO:001678	BP:cutin biosynthetic process;CC:cytosol;MF:epoxide hydrolase activity;MF:catalytic activity;MF:hydrolase activity;	------	------	------	------	ENOG410XRPK;COG0596;ENOG410XVV6	S:Function unknown;	NP_187211.1	alpha/beta-Hydrolases superfamily protein [Arabidopsis thaliana]	sp|I6YGS0|EPHA_MYCTU;	Epoxide hydrolase A OS=Mycobacterium tuberculosis;	PF12697.8;PF00561.21;PF12146.9	Abhydrolase_6;Abhydrolase_1;Hydrolase_4	Alpha/beta hydrolase family;alpha/beta hydrolase fold;Serine aminopeptidase, S33
AT5G63130		At5g63130 [Source:UniProtKB/TrEMBL;Acc:Q9FML0]	5.082	2.34549	1.57163e-05	9.79126e-05	yes	up	0.46	0.14	0.58	1.79	3.64	1.81	0.393333	2.41333	GO:0071456;GO:000551	BP:cellular response to hypoxia;MF:protein binding;	------	------	------	------	ENOG41118CH	S:Function unknown	NP_001318869.1	Octicosapeptide/Phox/Bem1p family protein [Arabidopsis thaliana]	------	------	PF00564.25	PB1	PB1 domain
AT1G18590	SOT17	SOT17 [Source:UniProtKB/TrEMBL;Acc:A0A384KIF3]	5.057	2.33831	2.36568e-45	4.79408e-43	yes	up	4.82	4.27	4.04	25.48	31.47	24.65	4.37667	27.2	GO:0019761;GO:0051923;GO:0005737;GO:0005634;GO:0008146;GO:0016740;GO:004736	BP:glucosinolate biosynthetic process;BP:sulfation;CC:cytoplasm;CC:nucleus;MF:sulfotransferase activity;MF:transferase activity;MF:desulfoglucosinolate sulfotransferase activity;	K22321	ST5B_C, SOT18_17	map00966	Glucosinolate biosynthesis	ENOG4111H56	G:Carbohydrate transport and metabolism	NP_173294.1	sulfotransferase 17 [Arabidopsis thaliana]	sp|Q9FZ80|SOT17_ARATH;	Cytosolic sulfotransferase 17 OS=Arabidopsis thaliana OX=3702 GN=SOT17 PE=1 SV=1;	PF00685.28;PF13469.7	Sulfotransfer_1;Sulfotransfer_3	Sulfotransferase domain;Sulfotransferase family
AT5G44480	DUR	Putative UDP-arabinose 4-epimerase 4 [Source:UniProtKB/Swiss-Prot;Acc:Q9FI17]	5.038	2.33297	4.56263e-06	3.16672e-05	yes	up	0.49	0.78	0.27	1.54	5.22	2.82	0.513333	3.19333	GO:0005975;GO:0006012;GO:0033358;GO:0045227;GO:0005794;GO:0016021;GO:0016020;GO:0032580;GO:0016853;GO:0050373;GO:000397	BP:carbohydrate metabolic process;BP:galactose metabolic process;BP:UDP-L-arabinose biosynthetic process;BP:capsule polysaccharide biosynthetic process;CC:Golgi apparatus;CC:integral component of membrane;CC:membrane;CC:Golgi cisterna membrane;MF:isomerase activity;MF:UDP-arabinose 4-epimerase activity;MF:UDP-glucose 4-epimerase activity;	K12448	UXE, uxe	map00520	Amino sugar and nucleotide sugar metabolism	COG1087	M:Cell wall/membrane/envelope biogenesis	NP_199261.1	NAD(P)-binding Rossmann-fold superfamily protein [Arabidopsis thaliana]	sp|Q9FI17|ARAE4_ARATH;	Putative UDP-arabinose 4-epimerase 4 OS=Arabidopsis thaliana OX=3702 GN=At5g44480 PE=3 SV=1;	PF16363.6;PF01370.22;PF01073.20;PF02719.16;PF04321.18;PF13460.7;PF07993.13;PF00106.26	GDP_Man_Dehyd;Epimerase;3Beta_HSD;Polysacc_synt_2;RmlD_sub_bind;NAD_binding_10;NAD_binding_4;adh_short	GDP-mannose 4,6 dehydratase;NAD dependent epimerase/dehydratase family;3-beta hydroxysteroid dehydrogenase/isomerase family;Polysaccharide biosynthesis protein;RmlD substrate binding domain;NA;Male sterility protein;short chain dehydrogenase
AT5G54490	PBP1	PBP1 [Source:UniProtKB/TrEMBL;Acc:A0A178URF6]	5.036	2.33232	5.89222e-10	7.88603e-09	yes	up	1.66	1.23	1.25	12.48	6.85	6.06	1.38	8.46333	GO:0009733;GO:0071456;GO:0046872;GO:0005509;GO:000551	BP:response to auxin;BP:cellular response to hypoxia;MF:metal ion binding;MF:calcium ion binding;MF:protein binding;	K16465	CETN1	------	------	COG5126	S:Function unknown	NP_200260.1	pinoid-binding protein 1 [Arabidopsis thaliana]	sp|Q9LSQ6|PBP1_ARATH;	Calcium-binding protein PBP1 OS=Arabidopsis thaliana OX=3702 GN=PBP1 PE=1 SV=1;	PF13833.7	EF-hand_8	EF-hand domain pair
AT4G08770	PER37	Peroxidase 37 [Source:UniProtKB/Swiss-Prot;Acc:Q9LDN9]	5.034	2.33164	4.37014e-21	1.95166e-19	yes	up	2.39	2.87	1.97	15.79	17.92	11.14	2.41	14.95	GO:0045926;GO:0006979;GO:0098869;GO:0042744;GO:0055114;GO:0005773;GO:0005576;GO:0020037;GO:0046872;GO:0004601;GO:001649	BP:negative regulation of growth;BP:response to oxidative stress;BP:cellular oxidant detoxification;BP:hydrogen peroxide catabolic process;BP:oxidation-reduction process;CC:vacuole;CC:extracellular region;MF:heme binding;MF:metal ion binding;MF:peroxidase activity;MF:oxidoreductase activity;	K00430	E1.11.1.7	map00940	Phenylpropanoid biosynthesis	ENOG41119N5	S:Function unknown	NP_192617.1	Peroxidase superfamily protein [Arabidopsis thaliana]	sp|Q9LDN9|PER37_ARATH;	Peroxidase 37 OS=Arabidopsis thaliana OX=3702 GN=PER37 PE=2 SV=1;	PF00141.24	peroxidase	Peroxidase
AT3G03850		At3g03850 [Source:UniProtKB/TrEMBL;Acc:Q6NMM4]	5.027	2.32964	3.00274e-08	3.07005e-07	yes	up	1.23	1.48	0.93	6.82	7.28	8.05	1.21333	7.38333	GO:0009733;GO:000367	BP:response to auxin;MF:molecular_function;	K14488	SAUR	map04075	Plant hormone signal transduction	------	------	NP_187035.2	SAUR-like auxin-responsive protein family [Arabidopsis thaliana]	sp|Q9SRW0|SAU28_ARATH;	Auxin-responsive protein SAUR28 OS=Arabidopsis thaliana OX=3702 GN=SAUR28 PE=2 SV=1;	PF02519.15	Auxin_inducible	Auxin responsive protein
AT3G49110	PER33	Peroxidase 33 [Source:UniProtKB/Swiss-Prot;Acc:P24101]	4.991	2.31938	3.33105e-46	7.01513e-44	yes	up	13.81	17.2	10.57	94.71	84.61	77.22	13.86	85.5133	GO:0042744;GO:0009416;GO:0042742;GO:0009826;GO:0098869;GO:0002221;GO:0072593;GO:0050832;GO:0006979;GO:0055114;GO:0006952;GO:0048046;GO:0005774;GO:0005773;GO:0009505;GO:0005794;GO:0099503;GO:0005829;GO:0005618;GO:0005576;GO:0016491;GO:0020037;GO:0046872;GO:000460	BP:hydrogen peroxide catabolic process;BP:response to light stimulus;BP:defense response to bacterium;BP:unidimensional cell growth;BP:cellular oxidant detoxification;BP:pattern recognition receptor signaling pathway;BP:reactive oxygen species metabolic process;BP:defense response to fungus;BP:response to oxidative stress;BP:oxidation-reduction process;BP:defense response;CC:apoplast;CC:vacuolar …	K00430	E1.11.1.7	map00940	Phenylpropanoid biosynthesis	ENOG41119N5	G:Carbohydrate transport and metabolism	NP_190480.1	peroxidase CA [Arabidopsis thaliana]	sp|P24101|PER33_ARATH;	Peroxidase 33 OS=Arabidopsis thaliana OX=3702 GN=PER33 PE=1 SV=1;	PF00141.24	peroxidase	Peroxidase
AT1G08543		-	4.989	2.31879	0.00379552	0.0129559	yes	up	0	0.96	1.01	6.13	4.45	1.79	0.656667	4.12333	GO:0005773;GO:0050661;GO:0050660;GO:000449	CC:vacuole;MF:NADP binding;MF:flavin adenine dinucleotide binding;MF:N,N-dimethylaniline monooxygenase activity;	------	------	------	------	COG2072	S:Function unknown	NP_001322976.1	Flavin-binding monooxygenase family protein [Arabidopsis thaliana]	sp|Q94BV5|GSXL4_ARATH;	Flavin-containing monooxygenase FMO GS-OX-like 4 OS=Arabidopsis thaliana OX=3702 GN=At1g62600 PE=2 SV=1;	------	------	------
AT3G28180	CSLC4	Glycosyltransferase (Fragment) [Source:UniProtKB/TrEMBL;Acc:W8Q6R3]	4.983	2.31692	1.69506e-41	2.93641e-39	yes	up	8.53	6.24	6.05	38.65	35.51	53.57	6.94	42.5767	GO:0048868;GO:0071555;GO:0099402;GO:0005794;GO:0016020;GO:0016021;GO:0005802;GO:0000138;GO:0000139;GO:0005886;GO:0005768;GO:0016757;GO:0016740;GO:0005515;GO:004280	BP:pollen tube development;BP:cell wall organization;BP:plant organ development;CC:Golgi apparatus;CC:membrane;CC:integral component of membrane;CC:trans-Golgi network;CC:Golgi trans cisterna;CC:Golgi membrane;CC:plasma membrane;CC:endosome;MF:transferase activity, transferring glycosyl groups;MF:transferase activity;MF:protein binding;MF:protein homodimerization activity;	K20887	CSLC4	------	------	COG1215	S:Function unknown	NP_566835.1	Cellulose-synthase-like C4 [Arabidopsis thaliana]	sp|Q9LJP4|CSLC4_ARATH;	Xyloglucan glycosyltransferase 4 OS=Arabidopsis thaliana OX=3702 GN=CSLC4 PE=1 SV=1;	PF13632.7;PF13641.7;PF00535.27;PF13506.7	Glyco_trans_2_3;Glyco_tranf_2_3;Glycos_transf_2;Glyco_transf_21	Glycosyl transferase family group 2;Glycosyltransferase like family 2;Glycosyl transferase family 2;Glycosyl transferase family 21
AT5G47910	RBOHD	Respiratory burst oxidase homolog protein D [Source:UniProtKB/Swiss-Prot;Acc:Q9FIJ0]	4.979	2.31596	1.73091e-51	4.6477e-49	yes	up	9.27	6.32	7.87	41.44	58.29	44.3	7.82	48.01	GO:0007231;GO:0033500;GO:0098869;GO:0071456;GO:0043069;GO:0072593;GO:0050832;GO:0009408;GO:0055114;GO:0006952;GO:0009611;GO:0009536;GO:0016021;GO:0016020;GO:0005794;GO:0005886;GO:0016174;GO:0016491;GO:0050664;GO:0005509;GO:0046872;GO:0004601;GO:000551	BP:osmosensory signaling pathway;BP:carbohydrate homeostasis;BP:cellular oxidant detoxification;BP:cellular response to hypoxia;BP:negative regulation of programmed cell death;BP:reactive oxygen species metabolic process;BP:defense response to fungus;BP:response to heat;BP:oxidation-reduction process;BP:defense response;BP:response to wounding;CC:plastid;CC:integral component of membrane;CC:membr…	K13447	RBOH	map04016;map04626	MAPK signaling pathway - plant;Plant-pathogen interaction	ENOG410XNZY	S:Function unknown	NP_199602.1	respiratory burst oxidase homologue D [Arabidopsis thaliana]	sp|Q9FIJ0|RBOHD_ARATH;	Respiratory burst oxidase homolog protein D OS=Arabidopsis thaliana OX=3702 GN=RBOHD PE=1 SV=1;	PF08030.13;PF08022.13;PF08414.11;PF01794.20;PF13499.7;PF00036.33;PF13405.7	NAD_binding_6;FAD_binding_8;NADPH_Ox;Ferric_reduct;EF-hand_7;EF-hand_1;EF-hand_6	Ferric reductase NAD binding domain;FAD-binding domain;Respiratory burst NADPH oxidase;Ferric reductase like transmembrane component;EF-hand domain pair;EF hand;EF-hand domain
AT1G52030	F-ATMBP	Myrosinase-binding protein 2 [Source:UniProtKB/Swiss-Prot;Acc:Q9SAV1]	4.967	2.31247	0.00897014	0.0271009	yes	up	0.16	0.06	0	0.5	0.49	0.38	0.0733333	0.456667	GO:0009611;GO:0006952;GO:0007155;GO:0009908;GO:0010169;GO:0030246;GO:001018	BP:response to wounding;BP:defense response;BP:cell adhesion;BP:flower development;CC:thioglucosidase complex;MF:carbohydrate binding;MF:thioglucosidase binding;	------	------	------	------	ENOG4111KSN	S:Function unknown	BAA82151.1	myrosinase binding protein [Arabidopsis thaliana]	sp|Q9SAV1|JAL6_ARATH;	Myrosinase-binding protein 2 OS=Arabidopsis thaliana OX=3702 GN=F-ATMBP PE=2 SV=1;	PF01419.18	Jacalin	Jacalin-like lectin domain
AT2G43150		Proline-rich extensin-like family protein [Source:UniProtKB/TrEMBL;Acc:Q9ZW80]	4.961	2.31073	2.46551e-38	3.50739e-36	yes	up	25.99	34.64	20.96	175.56	135.14	187.4	27.1967	166.033	GO:0009664;GO:0016021;GO:000519	BP:plant-type cell wall organization;CC:integral component of membrane;MF:structural constituent of cell wall;	------	------	------	------	ENOG41119JU	S:Function unknown	OAP07414.1	hypothetical protein AXX17_AT2G40630 [Arabidopsis thaliana]	------	------	PF04554.14	Extensin_2	Extensin-like region
AT1G72520	LOX4	Lipoxygenase 4, chloroplastic [Source:UniProtKB/Swiss-Prot;Acc:Q9FNX8]	4.954	2.30856	0.000524262	0.0022651	yes	up	1.57	1.37	1.24	3.71	31.36	7.45	1.39333	14.1733	GO:0006633;GO:0034440;GO:0006631;GO:0080086;GO:0006629;GO:0009555;GO:0031408;GO:0009617;GO:0009611;GO:0009901;GO:0010193;GO:0048653;GO:0055114;GO:0009536;GO:0009507;GO:0016702;GO:0016165;GO:0046872;GO:0005515;GO:0051213;GO:001649	BP:fatty acid biosynthetic process;BP:lipid oxidation;BP:fatty acid metabolic process;BP:stamen filament development;BP:lipid metabolic process;BP:pollen development;BP:oxylipin biosynthetic process;BP:response to bacterium;BP:response to wounding;BP:anther dehiscence;BP:response to ozone;BP:anther development;BP:oxidation-reduction process;CC:plastid;CC:chloroplast;MF:oxidoreductase activity, ac…	K00454	LOX2S	map00591;map00592	Linoleic acid metabolism;alpha-Linolenic acid metabolism	ENOG410YN4N	S:Function unknown	NP_177396.1	PLAT/LH2 domain-containing lipoxygenase family protein [Arabidopsis thaliana]	sp|Q9FNX8|LOX4_ARATH;	Lipoxygenase 4, chloroplastic OS=Arabidopsis thaliana OX=3702 GN=LOX4 PE=2 SV=1;	PF00305.20;PF01477.24	Lipoxygenase;PLAT	Lipoxygenase;PLAT/LH2 domain
AT1G72910		Similar to part of disease resistance protein [Source:UniProtKB/TrEMBL;Acc:Q9SSN5]	4.915	2.2972	3.44284e-07	2.96059e-06	yes	up	8.42	11.98	21.33	107.09	72.86	73.86	13.91	84.6033	GO:0007165;GO:0071456;GO:0005739;GO:0016787;GO:0005515;GO:0050135;GO:0043531;GO:0003953;GO:006180	BP:signal transduction;BP:cellular response to hypoxia;CC:mitochondrion;MF:hydrolase activity;MF:protein binding;MF:NA;MF:ADP binding;MF:NAD+ nucleosidase activity;MF:NAD+ nucleotidase, cyclic ADP-ribose generating;	------	------	------	------	------	------	NP_177434.1	Toll-Interleukin-Resistance (TIR) domain-containing protein [Arabidopsis thaliana]	sp|Q9SSN3|TIR_ARATH;	Toll/interleukin-1 receptor-like protein OS=Arabidopsis thaliana OX=3702 GN=TIR PE=1 SV=1;	PF01582.21;PF13676.7;PF00931.23	TIR;TIR_2;NB-ARC	TIR domain;TIR domain;NB-ARC domain
AT5G17700	DTX25	Protein DETOXIFICATION [Source:UniProtKB/TrEMBL;Acc:A0A178UJQ3]	4.911	2.29612	4.05349e-19	1.4961e-17	yes	up	1.2	0.83	0.88	6.86	5.73	5.03	0.97	5.87333	GO:0055085;GO:0042908;GO:0016021;GO:0016020;GO:0015297;GO:0022857;GO:004291	BP:transmembrane transport;BP:xenobiotic transport;CC:integral component of membrane;CC:membrane;MF:antiporter activity;MF:transmembrane transporter activity;MF:xenobiotic transporter activity;	K03327	TC.MATE, SLC47A, norM, mdtK, dinF	------	------	COG0534	V:Defense mechanisms	NP_001330412.1	MATE efflux family protein [Arabidopsis thaliana]	sp|Q8L616|DTX25_ARATH;	Protein DETOXIFICATION 25 OS=Arabidopsis thaliana OX=3702 GN=DTX25 PE=2 SV=1;	PF01554.19	MatE	MatE
AT1G55260		Bifunctional inhibitor/lipid-transfer protein/seed storage 2S albumin superfamily protein [Source:UniProtKB/TrEMBL;Acc:F4I082]	4.902	2.2934	1.3833e-46	2.97146e-44	yes	up	10.73	6.7	7.84	51.25	50.27	49.68	8.42333	50.4	GO:0050832;GO:0006952;GO:0005634;GO:0016020;GO:0005886;GO:0016021;GO:003122	BP:defense response to fungus;BP:defense response;CC:nucleus;CC:membrane;CC:plasma membrane;CC:integral component of membrane;CC:anchored component of membrane;	------	------	------	------	ENOG410YR9F	K:Transcription	NP_564682.2	Bifunctional inhibitor/lipid-transfer protein/seed storage 2S albumin superfamily protein [Arabidopsis thaliana]	sp|O64864|YLS3_ARATH;	Protein YLS3 OS=Arabidopsis thaliana OX=3702 GN=YLS3 PE=2 SV=1;	PF14368.7;PF00234.23	LTP_2;Tryp_alpha_amyl	Probable lipid transfer;Protease inhibitor/seed storage/LTP family
AT3G20470	GRP5	Glycine-rich protein 5 [Source:UniProtKB/Swiss-Prot;Acc:Q9LTP5]	4.864	2.28213	4.13778e-06	2.90375e-05	yes	up	0.99	0.22	0.89	4.18	3.29	4.9	0.7	4.12333	GO:0009737;GO:0030307;GO:0046622;GO:0009413;GO:0009751;GO:0000325;GO:0005773;GO:0009505;GO:000519	BP:response to abscisic acid;BP:positive regulation of cell growth;BP:positive regulation of organ growth;BP:response to flooding;BP:response to salicylic acid;CC:plant-type vacuole;CC:vacuole;CC:plant-type cell wall;MF:structural constituent of cell wall;	------	------	------	------	ENOG41104ZP	S:Function unknown	CAA0383094.1	unnamed protein product [Arabidopsis thaliana]	sp|Q9LTP5|GRP5_ARATH;	Glycine-rich protein 5 OS=Arabidopsis thaliana OX=3702 GN=GRP5 PE=2 SV=1;	------	------	------
AT2G38750	ANN4	Annexin D4 [Source:UniProtKB/Swiss-Prot;Acc:Q9ZVJ6]	4.832	2.27276	3.86172e-13	7.5481e-12	yes	up	3.6	1.81	2.01	9.1	15.39	19.4	2.47333	14.63	GO:0009737;GO:0006970;GO:0009414;GO:0009651;GO:0009409;GO:0009408;GO:0005737;GO:0005794;GO:0009506;GO:0005544;GO:0005509;GO:0046872;GO:000372	BP:response to abscisic acid;BP:response to osmotic stress;BP:response to water deprivation;BP:response to salt stress;BP:response to cold;BP:response to heat;CC:cytoplasm;CC:Golgi apparatus;CC:plasmodesma;MF:calcium-dependent phospholipid binding;MF:calcium ion binding;MF:metal ion binding;MF:mRNA binding;	K17098	ANNAT	------	------	ENOG410XPUN	S:Function unknown	NP_181409.1	annexin 4 [Arabidopsis thaliana]	sp|Q9ZVJ6|ANXD4_ARATH;	Annexin D4 OS=Arabidopsis thaliana OX=3702 GN=ANN4 PE=1 SV=1;	PF00191.21	Annexin	Annexin
AT1G74100	SOT16	Sulfotransferase [Source:UniProtKB/TrEMBL;Acc:M1EU36]	4.829	2.27178	3.85153e-82	5.90963e-79	yes	up	20.88	16.56	19.71	108.55	126.2	103.56	19.05	112.77	GO:0019761;GO:0032260;GO:0051923;GO:0005737;GO:0005739;GO:0008146;GO:0016740;GO:004736	BP:glucosinolate biosynthetic process;BP:response to jasmonic acid stimulus involved in jasmonic acid and ethylene-dependent systemic resistance;BP:sulfation;CC:cytoplasm;CC:mitochondrion;MF:sulfotransferase activity;MF:transferase activity;MF:desulfoglucosinolate sulfotransferase activity;	K11821	ST5A, SOT16	map00380;map00966	Tryptophan metabolism;Glucosinolate biosynthesis	ENOG4111H56	S:Function unknown	NP_177550.1	sulfotransferase 16 [Arabidopsis thaliana]	sp|Q9C9D0|SOT16_ARATH;	Cytosolic sulfotransferase 16 OS=Arabidopsis thaliana OX=3702 GN=SOT16 PE=1 SV=1;	PF00685.28;PF13469.7	Sulfotransfer_1;Sulfotransfer_3	Sulfotransferase domain;Sulfotransferase family
AT4G37370	CYP81D8	Cytochrome P450, family 81, subfamily D, polypeptide 8 [Source:UniProtKB/TrEMBL;Acc:Q9SZT7]	4.826	2.2707	1.72558e-05	0.000106668	yes	up	2.83	2.66	3.77	12.81	31.88	10.47	3.08667	18.3867	GO:0080167;GO:0055114;GO:0005783;GO:0016021;GO:0016020;GO:0005886;GO:0004497;GO:0016705;GO:0020037;GO:0016709;GO:0005506;GO:0046872;GO:001649	BP:response to karrikin;BP:oxidation-reduction process;CC:endoplasmic reticulum;CC:integral component of membrane;CC:membrane;CC:plasma membrane;MF:monooxygenase activity;MF:oxidoreductase activity, acting on paired donors, with incorporation or reduction of molecular oxygen;MF:heme binding;MF:oxidoreductase activity, acting on paired donors, with incorporation or reduction of molecular oxygen, N…	K13260	CYP81E1_7	map00943	Isoflavonoid biosynthesis	COG2124	Q:Secondary metabolites biosynthesis, transport and catabolism	NP_195453.1	cytochrome P450, family 81, subfamily D, polypeptide 8 [Arabidopsis thaliana]	sp|Q9LHA1|C8D11_ARATH;	Cytochrome P450 81D11 OS=Arabidopsis thaliana OX=3702 GN=CYP81D11 PE=2 SV=1;	PF00067.23	p450	Cytochrome P450
AT1G74950	TIFY10B	TIFY10B [Source:UniProtKB/TrEMBL;Acc:A0A178WA69]	4.816	2.26774	7.84148e-38	1.07976e-35	yes	up	24.18	24.01	27.11	104.24	154.25	183.68	25.1	147.39	GO:2000022;GO:0009753;GO:0009611;GO:0006952;GO:0031347;GO:0005634;GO:0042802;GO:000551	BP:regulation of jasmonic acid mediated signaling pathway;BP:response to jasmonic acid;BP:response to wounding;BP:defense response;BP:regulation of defense response;CC:nucleus;MF:identical protein binding;MF:protein binding;	K13464	JAZ	map04075	Plant hormone signal transduction	ENOG410ZDCD	S:Function unknown	NP_565096.1	TIFY domain/Divergent CCT motif family protein [Arabidopsis thaliana]	sp|Q9S7M2|TI10B_ARATH;	Protein TIFY 10B OS=Arabidopsis thaliana OX=3702 GN=TIFY10B PE=1 SV=1;	PF06200.15;PF09425.11	tify;Jas_motif	tify domain;Jas motif
AT1G77855		unknown protein; BEST Arabidopsis thaliana protein match is: unknown protein (TAIR:AT1G22030.1); Ha. [Source:TAIR;Acc:AT1G77855]	4.806	2.26472	0.00289378	0.010234	yes	up	0.21	0.04	0.26	0.82	1.01	1.18	0.17	1.00333	GO:0008150;GO:0016021;GO:0016020;GO:0000139;GO:000425	BP:biological_process;CC:integral component of membrane;CC:membrane;CC:Golgi membrane;MF:serine-type endopeptidase activity;	------	------	------	------	ENOG41105EV;ENOG410YCAI	S:Function unknown;	NP_683505.1	BPS1-like protein [Arabidopsis thaliana]	------	------	PF05633.12;PF03087.15	BPS1;DUF241	Protein BYPASS1-related;Arabidopsis protein of unknown function
AT3G50930	HSR4	Protein HYPER-SENSITIVITY-RELATED 4 [Source:UniProtKB/Swiss-Prot;Acc:Q8VZG2]	4.801	2.26341	0.00190775	0.00710356	yes	up	1.6	0.88	0.59	3.63	12.06	3.14	1.02333	6.27667	GO:0009411;GO:0009617;GO:0006952;GO:0009863;GO:0002237;GO:0008219;GO:0009626;GO:0016020;GO:0016021;GO:0005739;GO:0005740;GO:0005741;GO:0016787;GO:0000166;GO:0042802;GO:0016887;GO:000552	BP:response to UV;BP:response to bacterium;BP:defense response;BP:salicylic acid mediated signaling pathway;BP:response to molecule of bacterial origin;BP:cell death;BP:plant-type hypersensitive response;CC:membrane;CC:integral component of membrane;CC:mitochondrion;CC:mitochondrial envelope;CC:mitochondrial outer membrane;MF:hydrolase activity;MF:nucleotide binding;MF:identical protein binding;M…	K08900	BCS1	------	------	COG0465	S:Function unknown	NP_190662.2	cytochrome BC1 synthesi [Arabidopsis thaliana]	sp|Q8VZG2|HSR4_ARATH;	Protein HYPER-SENSITIVITY-RELATED 4 OS=Arabidopsis thaliana OX=3702 GN=HSR4 PE=2 SV=1;	PF14363.7;PF00004.30;PF05496.13;PF13191.7;PF05673.14	AAA_assoc;AAA;RuvB_N;AAA_16;DUF815	Domain associated at C-terminal with AAA;ATPase family associated with various cellular activities;Holliday junction DNA helicase RuvB P-loop domain;AAA ATPase domain;Protein of unknown function
AT5G65390	AGP7	Classical arabinogalactan protein 7 [Source:UniProtKB/Swiss-Prot;Acc:Q8LG54]	4.79	2.26003	1.09024e-17	3.58096e-16	yes	up	9.39	6.26	5.63	41.82	26.86	54.59	7.09333	41.09	GO:0031225;GO:0016020;GO:000588	CC:anchored component of membrane;CC:membrane;CC:plasma membrane;	------	------	------	------	------	------	NP_569011.1	arabinogalactan protein 7 [Arabidopsis thaliana]	sp|Q8LG54|AGP7_ARATH;	Classical arabinogalactan protein 7 OS=Arabidopsis thaliana OX=3702 GN=AGP7 PE=1 SV=2;	------	------	------
AT3G12502		other RNA [Source:TAIR;Acc:AT3G12502]	4.782	2.25764	0.0169407	0.0465708	yes	up	0.12	0.13	0.58	1.77	1.37	1.44	0.276667	1.52667	GO:0005975;GO:0016998;GO:0031640;GO:0009626;GO:0050832;GO:0000272;GO:0046686;GO:0006032;GO:0099503;GO:0005773;GO:0005774;GO:0005829;GO:0008061;GO:000456	BP:carbohydrate metabolic process;BP:cell wall macromolecule catabolic process;BP:killing of cells of other organism;BP:plant-type hypersensitive response;BP:defense response to fungus;BP:polysaccharide catabolic process;BP:response to cadmium ion;BP:chitin catabolic process;CC:secretory vesicle;CC:vacuole;CC:vacuolar membrane;CC:cytosol;MF:chitin binding;MF:chitinase activity;	K20547	CHIB	map00520;map04016	Amino sugar and nucleotide sugar metabolism;MAPK signaling pathway - plant	COG3979	G:Carbohydrate transport and metabolism	NP_566426.2	basic chitinase [Arabidopsis thaliana]	sp|P19171|CHIB_ARATH;	Basic endochitinase B OS=Arabidopsis thaliana OX=3702 GN=CHI-B PE=1 SV=3;	------	------	------
AT3G22830	HSFA6B	Heat stress transcription factor A-6b [Source:UniProtKB/Swiss-Prot;Acc:Q9LUH8]	4.756	2.24981	0.000725273	0.00303354	yes	up	0.07	0.34	0.25	0.92	1.97	1.06	0.22	1.31667	GO:0061408;GO:0043618;GO:0006355;GO:0006357;GO:0034605;GO:0005737;GO:0005634;GO:0042025;GO:0043565;GO:0044212;GO:0003700;GO:0000976;GO:0003677;GO:000097	BP:positive regulation of transcription from RNA polymerase II promoter in response to heat stress;BP:regulation of transcription from RNA polymerase II promoter in response to stress;BP:regulation of transcription, DNA-templated;BP:regulation of transcription from RNA polymerase II promoter;BP:cellular response to heat;CC:cytoplasm;CC:nucleus;CC:host cell nucleus;MF:sequence-specific DNA binding…	K09419	HSFF	------	------	COG5169	S:Function unknown	NP_188922.1	heat shock transcription factor A6B [Arabidopsis thaliana]	sp|Q9LUH8|HFA6B_ARATH;	Heat stress transcription factor A-6b OS=Arabidopsis thaliana OX=3702 GN=HSFA6b PE=2 SV=1;	PF00447.18	HSF_DNA-bind	HSF-type DNA-binding
AT3G29030	EXPA5	Expansin [Source:UniProtKB/TrEMBL;Acc:Q1ECM3]	4.746	2.24659	4.9667e-08	4.88954e-07	yes	up	2.35	1.33	0.51	10.5	9.66	5.3	1.39667	8.48667	GO:0009664;GO:0080022;GO:0009826;GO:0071555;GO:0005618;GO:0016020;GO:000557	BP:plant-type cell wall organization;BP:primary root development;BP:unidimensional cell growth;BP:cell wall organization;CC:cell wall;CC:membrane;CC:extracellular region;	------	------	------	------	ENOG4111DWI	G:Carbohydrate transport and metabolism	NP_189545.1	expansin A5 [Arabidopsis thaliana]	sp|Q38864|EXPA5_ARATH;	Expansin-A5 OS=Arabidopsis thaliana OX=3702 GN=EXPA5 PE=2 SV=1;	PF01357.22;PF03330.19	Expansin_C;DPBB_1	Expansin C-terminal domain;Lytic transglycolase
AT1G26410	FOX4	Berberine bridge enzyme-like 6 [Source:UniProtKB/Swiss-Prot;Acc:Q9FZC7]	4.738	2.24421	2.39329e-09	2.92935e-08	yes	up	0.9	0.97	1.82	4.63	11.16	5.77	1.23	7.18667	GO:0071456;GO:0055114;GO:0005618;GO:0005576;GO:0050660;GO:0000166;GO:0071949;GO:001649	BP:cellular response to hypoxia;BP:oxidation-reduction process;CC:cell wall;CC:extracellular region;MF:flavin adenine dinucleotide binding;MF:nucleotide binding;MF:FAD binding;MF:oxidoreductase activity;	------	------	------	------	COG0277	C:Energy production and conversion	NP_173965.1	FAD-binding Berberine family protein [Arabidopsis thaliana]	sp|Q9FZC7|FOX4_ARATH;	Berberine bridge enzyme-like 6 OS=Arabidopsis thaliana OX=3702 GN=FOX4 PE=2 SV=1;	PF01565.24;PF08031.13	FAD_binding_4;BBE	FAD binding domain;Berberine and berberine like
AT3G16530		Lectin-like protein At3g16530 [Source:UniProtKB/Swiss-Prot;Acc:Q9LK72]	4.717	2.23792	1.74136e-53	5.58301e-51	yes	up	32.98	36.19	34.83	186.77	250.19	165.46	34.6667	200.807	GO:0010200;GO:0002239;GO:0005618;GO:0005829;GO:0048046;GO:0005576;GO:0005634;GO:003024	BP:response to chitin;BP:response to oomycetes;CC:cell wall;CC:cytosol;CC:apoplast;CC:extracellular region;CC:nucleus;MF:carbohydrate binding;	------	------	------	------	ENOG411192G	S:Function unknown	NP_188274.1	Legume lectin family protein [Arabidopsis thaliana]	sp|Q9LK72|LECT5_ARATH;	Lectin-like protein At3g16530 OS=Arabidopsis thaliana OX=3702 GN=At3g16530 PE=1 SV=1;	PF00139.20	Lectin_legB	Legume lectin domain
AT2G39650		At2g39650 [Source:UniProtKB/TrEMBL;Acc:O48813]	4.701	2.233	1.7426e-18	6.1567e-17	yes	up	2.56	2.96	5.5	18.8	22.39	22.53	3.67333	21.24	------	------	------	------	------	------	ENOG4111PZI	S:Function unknown	OAP08101.1	hypothetical protein AXX17_AT2G36560 [Arabidopsis thaliana]	------	------	PF04720.13	PDDEXK_6	PDDEXK-like family of unknown function
AT4G39030	DTX47	Protein DETOXIFICATION 47, chloroplastic [Source:UniProtKB/Swiss-Prot;Acc:Q945F0]	4.696	2.23146	2.24179e-14	5.07439e-13	yes	up	1.13	1.19	0.57	4.56	6.49	5.76	0.963333	5.60333	GO:0006952;GO:0009751;GO:0045087;GO:0009624;GO:0055085;GO:0002376;GO:0031348;GO:0009697;GO:0042742;GO:0042908;GO:0031969;GO:0009536;GO:0009941;GO:0016021;GO:0016020;GO:0005739;GO:0005886;GO:0009507;GO:0015297;GO:004291	BP:defense response;BP:response to salicylic acid;BP:innate immune response;BP:response to nematode;BP:transmembrane transport;BP:immune system process;BP:negative regulation of defense response;BP:salicylic acid biosynthetic process;BP:defense response to bacterium;BP:xenobiotic transport;CC:chloroplast membrane;CC:plastid;CC:chloroplast envelope;CC:integral component of membrane;CC:membrane;CC:…	------	------	------	------	COG0534	G:Carbohydrate transport and metabolism	NP_195614.2	MATE efflux family protein [Arabidopsis thaliana]	sp|Q945F0|DTX47_ARATH;	Protein DETOXIFICATION 47, chloroplastic OS=Arabidopsis thaliana OX=3702 GN=DTX47 PE=2 SV=1;	PF01554.19;PF14667.7	MatE;Polysacc_synt_C	MatE;Polysaccharide biosynthesis C-terminal domain
AT5G12940		Leucine-rich repeat (LRR) family protein [Source:UniProtKB/TrEMBL;Acc:Q9LXU5]	4.688	2.22882	2.72833e-06	1.98669e-05	yes	up	0.47	0.37	0.4	3.07	2.43	1.64	0.413333	2.38	GO:000551	MF:protein binding;	------	------	------	------	COG4886	S:Function unknown	NP_196798.1	Leucine-rich repeat (LRR) family protein [Arabidopsis thaliana]	sp|Q00874|DR100_ARATH;	DNA damage-repair/toleration protein DRT100 OS=Arabidopsis thaliana OX=3702 GN=DRT100 PE=2 SV=2;	PF13855.7;PF12799.8;PF08263.13	LRR_8;LRR_4;LRRNT_2	Leucine rich repeat;Leucine Rich repeats;Leucine rich repeat N-terminal domain
AT5G04950	NAS1	Nicotianamine synthase 1 [Source:UniProtKB/Swiss-Prot;Acc:Q9FF79]	4.687	2.22871	3.01437e-17	9.50831e-16	yes	up	1.57	1.61	1.09	7.92	8.96	7.74	1.42333	8.20667	GO:0009555;GO:0009860;GO:0030418;GO:0010233;GO:0030410;GO:001674	BP:pollen development;BP:pollen tube growth;BP:nicotianamine biosynthetic process;BP:phloem transport;MF:nicotianamine synthase activity;MF:transferase activity;	K05953	E2.5.1.43	------	------	ENOG4111NF0	S:Function unknown	NP_196114.1	nicotianamine synthase 1 [Arabidopsis thaliana]	sp|Q9FF79|NAS1_ARATH;	Nicotianamine synthase 1 OS=Arabidopsis thaliana OX=3702 GN=NAS1 PE=2 SV=1;	PF03059.17;PF13847.7	NAS;Methyltransf_31	Nicotianamine synthase protein;Methyltransferase domain
AT4G19030	NIP1-1	NLM1 [Source:UniProtKB/TrEMBL;Acc:A0A384L612]	4.682	2.22708	1.81916e-05	0.000111809	yes	up	0.8	0.19	0.76	3.25	2.37	4.31	0.583333	3.31	GO:0015700;GO:0080170;GO:0006833;GO:0046685;GO:0055085;GO:0031347;GO:0016021;GO:0016020;GO:0005886;GO:0015105;GO:0015250;GO:0015267;GO:000551	BP:arsenite transport;BP:hydrogen peroxide transmembrane transport;BP:water transport;BP:response to arsenic-containing substance;BP:transmembrane transport;BP:regulation of defense response;CC:integral component of membrane;CC:membrane;CC:plasma membrane;MF:arsenite transmembrane transporter activity;MF:water channel activity;MF:channel activity;MF:protein binding;	K09874	NIP	------	------	COG0580	L:Replication, recombination and repair	NP_567572.1	NOD26-like major intrinsic protein 1 [Arabidopsis thaliana]	sp|Q8VZW1|NIP11_ARATH;	Aquaporin NIP1-1 OS=Arabidopsis thaliana OX=3702 GN=NIP1-1 PE=1 SV=1;	PF00230.21	MIP	Major intrinsic protein
AT2G44300		At2g44300 [Source:UniProtKB/TrEMBL;Acc:O64865]	4.675	2.22505	4.93822e-09	5.70926e-08	yes	up	1.45	1	0.59	5.47	6.46	5.38	1.01333	5.77	GO:0080027;GO:0010150;GO:0006869;GO:0009625;GO:0005829;GO:0016020;GO:0005886;GO:0016021;GO:0031225;GO:000828	BP:response to herbivore;BP:leaf senescence;BP:lipid transport;BP:response to insect;CC:cytosol;CC:membrane;CC:plasma membrane;CC:integral component of membrane;CC:anchored component of membrane;MF:lipid binding;	------	------	------	------	ENOG410YR9F	S:Function unknown	NP_181959.1	Bifunctional inhibitor/lipid-transfer protein/seed storage 2S albumin superfamily protein [Arabidopsis thaliana]	sp|O64864|YLS3_ARATH;	Protein YLS3 OS=Arabidopsis thaliana OX=3702 GN=YLS3 PE=2 SV=1;	PF14368.7;PF00234.23	LTP_2;Tryp_alpha_amyl	Probable lipid transfer;Protease inhibitor/seed storage/LTP family
AT1G69930	GSTU11	Glutathione S-transferase U11 [Source:UniProtKB/Swiss-Prot;Acc:Q9CAS6]	4.672	2.22418	0.0173887	0.0475831	yes	up	0.34	0.54	0.11	0.49	4.78	0.51	0.33	1.92667	GO:0006749;GO:0009636;GO:0009407;GO:0005737;GO:0005829;GO:0004364;GO:0016740;GO:000551	BP:glutathione metabolic process;BP:response to toxic substance;BP:toxin catabolic process;CC:cytoplasm;CC:cytosol;MF:glutathione transferase activity;MF:transferase activity;MF:protein binding;	K00799	GST, gst	map00480	Glutathione metabolism	ENOG410XSIX	O:Posttranslational modification, protein turnover, chaperones	NP_177151.1	glutathione S-transferase TAU 11 [Arabidopsis thaliana]	sp|Q9CAS6|GSTUB_ARATH;	Glutathione S-transferase U11 OS=Arabidopsis thaliana OX=3702 GN=GSTU11 PE=2 SV=1;	PF13417.7;PF02798.21;PF13409.7	GST_N_3;GST_N;GST_N_2	Glutathione S-transferase, N-terminal domain;Glutathione S-transferase, N-terminal domain;Glutathione S-transferase, N-terminal domain
AT1G66090		Disease resistance protein (TIR-NBS class) [Source:UniProtKB/TrEMBL;Acc:Q9C515]	4.667	2.22265	1.1584e-21	5.52969e-20	yes	up	3.57	2.04	3.09	15.26	20.87	13.62	2.9	16.5833	GO:0006952;GO:0007165;GO:0071456;GO:0016021;GO:0016787;GO:0005515;GO:0050135;GO:0043531;GO:0003953;GO:006180	BP:defense response;BP:signal transduction;BP:cellular response to hypoxia;CC:integral component of membrane;MF:hydrolase activity;MF:protein binding;MF:NA;MF:ADP binding;MF:NAD+ nucleosidase activity;MF:NAD+ nucleotidase, cyclic ADP-ribose generating;	------	------	------	------	COG4886;ENOG410ZQRA	S:Function unknown;K:Transcription	NP_176783.1	Disease resistance protein (TIR-NBS class) [Arabidopsis thaliana]	sp|F4I594|RLM1A_ARATH;	Disease resistance protein RML1A OS=Arabidopsis thaliana OX=3702 GN=RLM1A PE=3 SV=1;	PF01582.21;PF00931.23;PF13676.7;PF13401.7;PF13191.7;PF05729.13;PF03215.16;PF00005.28;PF03266.16	TIR;NB-ARC;TIR_2;AAA_22;AAA_16;NACHT;Rad17;ABC_tran;NTPase_1	TIR domain;NB-ARC domain;TIR domain;AAA domain;AAA ATPase domain;NACHT domain;Rad17 P-loop domain;ABC transporter;NTPase
AT1G78410	VQ10	VQ motif-containing protein 10 [Source:UniProtKB/Swiss-Prot;Acc:Q8VYI5]	4.657	2.21937	3.07284e-08	3.13249e-07	yes	up	1.45	2.3	1.9	8.76	16.32	6.65	1.88333	10.5767	GO:0006979;GO:0005634;GO:000551	BP:response to oxidative stress;CC:nucleus;MF:protein binding;	------	------	------	------	ENOG41115YH	S:Function unknown	NP_001321086.1	VQ motif-containing protein [Arabidopsis thaliana]	sp|Q8VYI5|VQ10_ARATH;	VQ motif-containing protein 10 OS=Arabidopsis thaliana OX=3702 GN=VQ10 PE=1 SV=1;	PF05678.15	VQ	VQ motif
AT4G11211		At4g11211 [Source:UniProtKB/TrEMBL;Acc:Q3EA55]	4.653	2.21824	1.30511e-16	3.80395e-15	yes	up	11.82	5.94	7.16	48.37	46	41.53	8.30667	45.3	------	------	------	------	------	------	------	------	ESQ38387.1	hypothetical protein EUTSA_v10029180mg [Eutrema salsugineum]	------	------	------	------	------
AT1G18570	MYB51	Transcription factor MYB51 [Source:UniProtKB/Swiss-Prot;Acc:O49782]	4.645	2.21581	7.05821e-78	8.65472e-75	yes	up	12.43	13.72	14.2	69.31	83.58	78.33	13.45	77.0733	GO:0030154;GO:0052544;GO:0009682;GO:0009617;GO:0009625;GO:0006355;GO:0042742;GO:0009759;GO:0005634;GO:0043565;GO:0044212;GO:0003700;GO:0000976;GO:000367	BP:cell differentiation;BP:defense response by callose deposition in cell wall;BP:induced systemic resistance;BP:response to bacterium;BP:response to insect;BP:regulation of transcription, DNA-templated;BP:defense response to bacterium;BP:indole glucosinolate biosynthetic process;CC:nucleus;MF:sequence-specific DNA binding;MF:transcription regulatory region DNA binding;MF:transcription factor act…	K09422	MYBP	------	------	COG5147	S:Function unknown	NP_173292.1	myb domain protein 51 [Arabidopsis thaliana]	sp|O49782|MYB51_ARATH;	Transcription factor MYB51 OS=Arabidopsis thaliana OX=3702 GN=MYB51 PE=1 SV=2;	PF00249.32;PF13921.7	Myb_DNA-binding;Myb_DNA-bind_6	Myb-like DNA-binding domain;Myb-like DNA-binding domain
AT1G64640	ENODL8	ENODL8 [Source:UniProtKB/TrEMBL;Acc:A0A178WAZ0]	4.641	2.21438	4.75639e-20	1.93875e-18	yes	up	7.26	3.87	3.74	29.86	23.7	30.11	4.95667	27.89	GO:0022900;GO:0031225;GO:0046658;GO:0016021;GO:000905	BP:electron transport chain;CC:anchored component of membrane;CC:anchored component of plasma membrane;CC:integral component of membrane;MF:electron carrier activity;	------	------	------	------	ENOG410YR23	S:Function unknown	NP_176645.3	early nodulin-like protein 8 [Arabidopsis thaliana]	sp|P80728|MAVI_CUCPE;	Mavicyanin OS=Cucurbita pepo OX=3663 PE=1 SV=1;	PF02298.18	Cu_bind_like	Plastocyanin-like domain
AT2G29350	SAG13	SAG13 [Source:UniProtKB/TrEMBL;Acc:A0A178VTS8]	4.639	2.21371	4.88848e-07	4.10193e-06	yes	up	0.75	2.18	1.32	7.63	12.51	4.31	1.41667	8.15	GO:0007568;GO:0055114;GO:0002213;GO:0031347;GO:0016021;GO:0016020;GO:0005777;GO:0005886;GO:0004022;GO:001649	BP:aging;BP:oxidation-reduction process;BP:defense response to insect;BP:regulation of defense response;CC:integral component of membrane;CC:membrane;CC:peroxisome;CC:plasma membrane;MF:alcohol dehydrogenas;MF:oxidoreductase activity;	K08081	TR1	map00960	Tropane, piperidine and pyridine alkaloid biosynthesis	COG1028	S:Function unknown	NP_180496.1	senescence-associated gene 13 [Arabidopsis thaliana]	sp|Q9ZW18|SAG13_ARATH;	Senescence-associated protein 13 OS=Arabidopsis thaliana OX=3702 GN=SAG13 PE=1 SV=1;	PF13561.7;PF00106.26;PF08659.11	adh_short_C2;adh_short;KR	Enoyl;short chain dehydrogenase;KR domain
AT5G61000	RPA1D	Replication protein A subunit [Source:UniProtKB/TrEMBL;Acc:A0A178UJ91]	4.625	2.20954	1.78346e-10	2.56601e-09	yes	up	0.59	0.38	0.61	3.82	2.46	2.68	0.526667	2.98667	GO:0007004;GO:0000723;GO:0051321;GO:0000724;GO:0006260;GO:0006261;GO:0006268;GO:0006281;GO:0006289;GO:0006974;GO:0006310;GO:0000784;GO:0005634;GO:0005662;GO:0003676;GO:0003677;GO:0043565;GO:0043047;GO:0000166;GO:0046872;GO:0003697;GO:0005524;GO:0016787;GO:0004386;GO:000368	BP:telomere maintenance via telomerase;BP:telomere maintenance;BP:meiotic cell cycle;BP:double-strand break repair via homologous recombination;BP:DNA replication;BP:DNA-dependent DNA replication;BP:DNA unwinding involved in DNA replication;BP:DNA repair;BP:nucleotide-excision repair;BP:cellular response to DNA damage stimulus;BP:DNA recombination;CC:nuclear chromosome, telomeric region;CC:nucleu…	K07466	RFA1, RPA1, rpa	map03430;map03440;map03420;map03030	Mismatch repair;Homologous recombination;Nucleotide excision repair;DNA replication	COG1599	L:Replication, recombination and repair	NP_200908.1	Replication factor-A protein 1-like protein [Arabidopsis thaliana]	sp|Q9FME0|RFA1D_ARATH;	Replication protein A 70 kDa DNA-binding subunit D OS=Arabidopsis thaliana OX=3702 GN=RPA1D PE=2 SV=1;	PF08646.11;PF04057.13;PF16900.6;PF01336.26;PF02721.15;PF17244.3	Rep_fac-A_C;Rep-A_N;REPA_OB_2;tRNA_anti-codon;DUF223;CDC24_OB3	Replication factor-A C terminal domain;Replication factor-A protein 1, N-terminal domain;Replication protein A OB domain;OB-fold nucleic acid binding domain;Domain of unknown function DUF223;Cell division control protein 24, OB domain 3
AT3G23810	SAHH2	Adenosylhomocysteinase [Source:UniProtKB/TrEMBL;Acc:A0A178VEP9]	4.624	2.20904	8.97778e-28	7.09014e-26	yes	up	13.96	8.36	9.21	76.33	44.95	57.33	10.51	59.5367	GO:0033353;GO:0006730;GO:0005829;GO:0005773;GO:0005886;GO:0016787;GO:0004013;GO:000372	BP:S-adenosylmethionine cycle;BP:one-carbon metabolic process;CC:cytosol;CC:vacuole;CC:plasma membrane;MF:hydrolase activity;MF:adenosylhomocysteinase activity;MF:mRNA binding;	K01251	E3.3.1.1, ahcY	map00270	Cysteine and methionine metabolism	COG0499	S:Function unknown	NP_189023.1	S-adenosyl-l-homocysteine (SAH) hydrolase 2 [Arabidopsis thaliana]	sp|Q9LK36|SAHH2_ARATH;	Adenosylhomocysteinase 2 OS=Arabidopsis thaliana OX=3702 GN=SAHH2 PE=2 SV=1;	PF05221.18;PF00670.22;PF02826.20;PF07991.13	AdoHcyase;AdoHcyase_NAD;2-Hacid_dh_C;IlvN	S-adenosyl-L-homocysteine hydrolase;S-adenosyl-L-homocysteine hydrolase, NAD binding domain;D-isomer specific 2-hydroxyacid dehydrogenase, NAD binding domain;Acetohydroxy acid isomeroreductase, NADPH-binding domain
AT2G33570	GALS1	Galactan beta-1,4-galactosyltransferase GALS1 [Source:UniProtKB/Swiss-Prot;Acc:O22807]	4.624	2.20901	3.90219e-19	1.44274e-17	yes	up	2.88	1.97	1.77	12.73	8.81	16.02	2.20667	12.52	GO:0042546;GO:0045489;GO:0071555;GO:0005794;GO:0016021;GO:0016020;GO:0000139;GO:0016740;GO:0016757;GO:000383	BP:cell wall biogenesis;BP:pectin biosynthetic process;BP:cell wall organization;CC:Golgi apparatus;CC:integral component of membrane;CC:membrane;CC:Golgi membrane;MF:transferase activity;MF:transferase activity, transferring glycosyl groups;MF:beta-N-acetylglucosaminylglycopeptide beta-1,4-galactosyltransferase activity;	K23869	GALS	------	------	ENOG410Z7P2	S:Function unknown	NP_565768.1	glycosyltransferase family protein (DUF23) [Arabidopsis thaliana]	sp|O22807|GALS1_ARATH;	Galactan beta-1,4-galactosyltransferase GALS1 OS=Arabidopsis thaliana OX=3702 GN=GALS1 PE=2 SV=2;	PF01697.28;PF13704.7	Glyco_transf_92;Glyco_tranf_2_4	Glycosyltransferase family 92;Glycosyl transferase family 2
AT2G30750	CYP71A12	Cytochrome P450 71A12 [Source:UniProtKB/Swiss-Prot;Acc:O49340]	4.622	2.20838	7.06165e-05	0.000379418	yes	up	5.37	6.72	11.87	35	74.55	27.31	7.98667	45.62	GO:0006952;GO:0055114;GO:0016020;GO:0016021;GO:0004497;GO:0020037;GO:0016705;GO:0047720;GO:0005506;GO:0046872;GO:001649	BP:defense response;BP:oxidation-reduction process;CC:membrane;CC:integral component of membrane;MF:monooxygenase activity;MF:heme binding;MF:oxidoreductase activity, acting on paired donors, with incorporation or reduction of molecular oxygen;MF:indoleacetaldoxime dehydratase activity;MF:iron ion binding;MF:metal ion binding;MF:oxidoreductase activity;	K11868	CYP71A13	map00380	Tryptophan metabolism	COG2124	T:Signal transduction mechanisms	NP_180633.3	cytochrome P450 family 71 polypeptide [Arabidopsis thaliana]	sp|O49340|C71AC_ARATH;	Cytochrome P450 71A12 OS=Arabidopsis thaliana OX=3702 GN=CYP71A12 PE=2 SV=1;	PF00067.23	p450	Cytochrome P450
AT1G75780	TUBB1	Tubulin beta-1 chain [Source:UniProtKB/Swiss-Prot;Acc:P12411]	4.587	2.19769	1.00351e-18	3.58079e-17	yes	up	2.02	1.28	1.44	10.82	7.64	8.23	1.58	8.89667	GO:0007010;GO:0000278;GO:0009826;GO:0007017;GO:0000226;GO:0009416;GO:0005737;GO:0005856;GO:0005773;GO:0005874;GO:0005200;GO:0003924;GO:0000166;GO:0005525;GO:000372	BP:cytoskeleton organization;BP:mitotic cell cycle;BP:unidimensional cell growth;BP:microtubule-based process;BP:microtubule cytoskeleton organization;BP:response to light stimulus;CC:cytoplasm;CC:cytoskeleton;CC:vacuole;CC:microtubule;MF:structural constituent of cytoskeleton;MF:GTPase activity;MF:nucleotide binding;MF:GTP binding;MF:mRNA binding;	K07375	TUBB	map04145	Phagosome	COG5023	S:Function unknown	NP_177706.1	tubulin beta-1 chain [Arabidopsis thaliana]	sp|P12411|TBB1_ARATH;	Tubulin beta-1 chain OS=Arabidopsis thaliana OX=3702 GN=TUBB1 PE=2 SV=1;	PF00091.26;PF03953.18	Tubulin;Tubulin_C	Tubulin/FtsZ family, GTPase domain;Tubulin C-terminal domain
AT5G10430	AGP4	ATAGP4 [Source:UniProtKB/TrEMBL;Acc:A0A178UE88]	4.577	2.1945	1.02009e-20	4.44473e-19	yes	up	8.45	5.89	6.57	38.49	27.56	49.87	6.97	38.64	GO:0010198;GO:0031225;GO:0016021;GO:0016020;GO:000588	BP:synergid death;CC:anchored component of membrane;CC:integral component of membrane;CC:membrane;CC:plasma membrane;	------	------	------	------	COG0534	B:Chromatin structure and dynamics	NP_001330870.1	transmembrane protein [Arabidopsis thaliana]	sp|Q9ZT16|AGP4_ARATH;	Classical arabinogalactan protein 4 OS=Arabidopsis thaliana OX=3702 GN=AGP4 PE=1 SV=1;	------	------	------
AT4G13680		Uncharacterized protein AT4g13680 [Source:UniProtKB/TrEMBL;Acc:Q9SVP4]	4.566	2.19083	0.000123996	0.000628791	yes	up	0.42	0.26	0.31	2.34	2.28	0.9	0.33	1.84	------	------	------	------	------	------	ENOG41106XR	S:Function unknown	NP_193104.1	hypothetical protein (DUF295) [Arabidopsis thaliana]	------	------	------	------	------
AT1G68450	VQ8	VQ motif-containing protein 8, chloroplastic [Source:UniProtKB/Swiss-Prot;Acc:Q9CA36]	4.557	2.18793	0.0119217	0.0346866	yes	up	1.14	0.08	1.16	1.09	10.28	1.82	0.793333	4.39667	GO:0007165;GO:0005634;GO:0009536;GO:0009507;GO:000551	BP:signal transduction;CC:nucleus;CC:plastid;CC:chloroplast;MF:protein binding;	------	------	------	------	ENOG410YP72	S:Function unknown	NP_177012.1	VQ motif-containing protein [Arabidopsis thaliana]	sp|Q9CA36|VQ8_ARATH;	VQ motif-containing protein 8, chloroplastic OS=Arabidopsis thaliana OX=3702 GN=VQ8 PE=2 SV=1;	PF05678.15	VQ	VQ motif
AT3G13600	IQM2	Calmodulin-binding family protein [Source:UniProtKB/TrEMBL;Acc:A0A178VF87]	4.547	2.18502	0.00115941	0.00459337	yes	up	0.27	0.38	0.12	0.49	2.4	0.92	0.256667	1.27	GO:0008150;GO:0005737;GO:000563	BP:biological_process;CC:cytoplasm;CC:nucleus;	------	------	------	------	ENOG410XYNX;ENOG4111I0K	S:Function unknown;	NP_001319541.1	calmodulin-binding family protein [Arabidopsis thaliana]	sp|Q9LHN9|IQM2_ARATH;	IQ domain-containing protein IQM2 OS=Arabidopsis thaliana OX=3702 GN=IQM2 PE=2 SV=1;	------	------	------
AT1G11740		Ankyrin repeat family protein [Source:UniProtKB/TrEMBL;Acc:F4IAG4]	4.546	2.18447	0.00450335	0.0150258	yes	up	0.17	0.02	0.17	0.78	0.32	0.89	0.12	0.663333	GO:0008150;GO:0005737;GO:0016021;GO:0016020;GO:0016765;GO:000551	BP:biological_process;CC:cytoplasm;CC:integral component of membrane;CC:membrane;MF:transferase activity, transferring alkyl or ary;MF:protein binding;	K21437	ANKRD13	------	------	ENOG410XNMS	S:Function unknown	NP_172639.2	ankyrin repeat family protein [Arabidopsis thaliana]	sp|Q5F259|AN13B_MOUSE;	Ankyrin repeat domain-containing protein 13B OS=Mus musculus OX=10090 GN=Ankrd13b PE=2 SV=1;	PF11904.9;PF13637.7;PF12796.8	GPCR_chapero_1;Ank_4;Ank_2	GPCR-chaperone;Ankyrin repeats;Ankyrin repeats
AT3G06520		Agenet domain-containing protein [Source:UniProtKB/TrEMBL;Acc:Q9C8Z3]	4.535	2.18122	1.0237e-09	1.31993e-08	yes	up	0.64	0.96	1.44	6.02	7.09	3.94	1.01333	5.68333	------	------	------	------	------	------	ENOG410YHUE	S:Function unknown	NP_001319487.1	agenet domain-containing protein [Arabidopsis thaliana]	sp|Q500V5|AGDP1_ARATH;	Protein AGENET DOMAIN;	PF05641.13	Agenet	Agenet domain
AT5G12340		DUF4228 domain protein [Source:UniProtKB/TrEMBL;Acc:Q1PDX4]	4.519	2.17592	0.00335484	0.0116441	yes	up	0.44	0.1	0.79	2.37	3.32	1.08	0.443333	2.25667	------	------	------	------	------	------	ENOG410YHQZ	S:Function unknown	ABK28270.1	unknown, partial [Arabidopsis thaliana]	------	------	PF14009.7	DUF4228	Domain of unknown function
AT1G62540	FMO GS-OX2	flavin-monooxygenase glucosinolate S-oxygenase 2 [Source:TAIR;Acc:AT1G62540]	4.498	2.16926	0.000217033	0.00103648	yes	up	0.2	0.55	0.12	1.76	2.15	1.02	0.29	1.64333	GO:0019761;GO:0055114;GO:0080107;GO:0080106;GO:0004497;GO:0050660;GO:0080103;GO:0080102;GO:0004499;GO:0050661;GO:0080104;GO:001649	BP:glucosinolate biosynthetic process;BP:oxidation-reduction process;MF:8-methylthiopropyl glucosinolate S-oxygenase activity;MF:7-methylthiopropyl glucosinolate S-oxygenase activity;MF:monooxygenase activity;MF:flavin adenine dinucleotide binding;MF:4-methylthiopropyl glucosinolate S-oxygenase activity;MF:3-methylthiopropyl glucosinolate S-oxygenase activity;MF:N,N-dimethylaniline monooxygenase …	K22324	GS-OX	------	------	COG2072	P:Inorganic ion transport and metabolism	NP_001320894.1	flavin-monooxygenase glucosinolate S-oxygenase 2 [Arabidopsis thaliana]	sp|Q94K43|GSOX2_ARATH;	Flavin-containing monooxygenase FMO GS-OX2 OS=Arabidopsis thaliana OX=3702 GN=FMOGS-OX2 PE=1 SV=1;	PF00743.20;PF13738.7;PF07992.15;PF01266.25;PF13450.7;PF00890.25;PF13454.7;PF01593.25;PF03486.15;PF12831.8;PF13434.7;PF01946.18;PF01494.20;PF00070.28;PF01134.23	FMO-like;Pyr_redox_3;Pyr_redox_2;DAO;NAD_binding_8;FAD_binding_2;NAD_binding_9;Amino_oxidase;HI0933_like;FAD_oxidored;K_oxygenase;Thi4;FAD_binding_3;Pyr_redox;GIDA	Flavin-binding monooxygenase-like;Pyridine nucleotide-disulphide oxidoreductase;Pyridine nucleotide-disulphide oxidoreductase;FAD dependent oxidoreductase;NA;FAD binding domain;FAD-NA;Flavin containing amine oxidoreductase;HI0933-like protein;FAD dependent oxidoreductase;L-lysine 6-monooxygenase;Thi4 family;FAD binding domain;Pyridine nucleotide-disulphide oxidoreductase;Glucose inhibited divisio…
AT1G62180	APR2	5'-adenylylsulfate reductase 2, chloroplastic [Source:UniProtKB/Swiss-Prot;Acc:P92981]	4.476	2.16205	7.72401e-57	2.81219e-54	yes	up	8.92	6.24	7.09	38.83	44.14	41.57	7.41667	41.5133	GO:0008652;GO:0019419;GO:0019344;GO:0019379;GO:0045454;GO:0000103;GO:0055114;GO:0009536;GO:0009570;GO:0005623;GO:0009507;GO:0033741;GO:0009973;GO:0003824;GO:0016671;GO:0005515;GO:0004604;GO:001649	BP:cellular amino acid biosynthetic process;BP:sulfate reduction;BP:cysteine biosynthetic process;BP:sulfate assimilation, phosphoadenylyl sulfate reduction by phosphoadenylyl-sulfate reductas;BP:cell redox homeostasis;BP:sulfate assimilation;BP:oxidation-reduction process;CC:plastid;CC:chloroplast stroma;CC:cell;CC:chloroplast;MF:adenylyl-sulfate reductas;MF:adenylyl-sulfate reductase activity;M…	K05907	APR	map00920	Sulfur metabolism	COG0175	P:Inorganic ion transport and metabolism	NP_176409.1	5'adenylylphosphosulfate reductase 2 [Arabidopsis thaliana]	sp|P92981|APR2_ARATH;	5'-adenylylsulfate reductase 2, chloroplastic OS=Arabidopsis thaliana OX=3702 GN=APR2 PE=1 SV=2;	PF01507.20;PF00085.21;PF13098.7	PAPS_reduct;Thioredoxin;Thioredoxin_2	Phosphoadenosine phosphosulfate reductase family;Thioredoxin;Thioredoxin-like domain
AT1G24100	UGT74B1	Glycosyltransferase [Source:UniProtKB/TrEMBL;Acc:A0A178WKT6]	4.471	2.16071	1.521e-77	1.71961e-74	yes	up	15.8	11.99	13.18	71.35	80.94	72.7	13.6567	74.9967	GO:0052544;GO:0019761;GO:0042742;GO:0005634;GO:0005829;GO:0043231;GO:0103101;GO:0047251;GO:0080044;GO:0103099;GO:0103100;GO:0103102;GO:0103103;GO:0102659;GO:0080043;GO:0016740;GO:0016757;GO:0016758;GO:000819	BP:defense response by callose deposition in cell wall;BP:glucosinolate biosynthetic process;BP:defense response to bacterium;CC:nucleus;CC:cytosol;CC:intracellular membrane-bounded organelle;MF:UDP-glucos;MF:thiohydroximate beta-D-glucosyltransferase activity;MF:quercetin 7-O-glucosyltransferase activity;MF:UDP-glucos;MF:UDP-glucos;MF:UDP-glucos;MF:UDP-glucos;MF:UDP-glucos;MF:quercetin 3-O-gluco…	K11820	UGT74B1	map00380;map00966	Tryptophan metabolism;Glucosinolate biosynthesis	COG1819	S:Function unknown	NP_173820.1	UDP-glucosyl transferase 74B1 [Arabidopsis thaliana]	sp|O48676|U74B1_ARATH;	UDP-glycosyltransferase 74B1 OS=Arabidopsis thaliana OX=3702 GN=UGT74B1 PE=1 SV=1;	PF00201.19	UDPGT	UDP-glucoronosyl and UDP-glucosyl transferase
AT2G06050	OPR3	12-oxophytodienoate reductase 3 [Source:UniProtKB/Swiss-Prot;Acc:Q9FUP0]	4.448	2.15326	1.34607e-29	1.1802e-27	yes	up	15.88	11.3	11.45	51.67	79.77	83.05	12.8767	71.4967	GO:0006633;GO:0048443;GO:0006631;GO:0006629;GO:0009695;GO:0009620;GO:0031408;GO:0010193;GO:0055114;GO:0005777;GO:0016629;GO:0003824;GO:0010181;GO:001649	BP:fatty acid biosynthetic process;BP:stamen development;BP:fatty acid metabolic process;BP:lipid metabolic process;BP:jasmonic acid biosynthetic process;BP:response to fungus;BP:oxylipin biosynthetic process;BP:response to ozone;BP:oxidation-reduction process;CC:peroxisome;MF:12-oxophytodienoate reductase activity;MF:catalytic activity;MF:FMN binding;MF:oxidoreductase activity;	K05894	OPR	map00592	alpha-Linolenic acid metabolism	COG1902	S:Function unknown	NP_001077884.1	oxophytodienoate-reductase 3 [Arabidopsis thaliana]	sp|Q9FUP0|OPR3_ARATH;	12-oxophytodienoate reductase 3 OS=Arabidopsis thaliana OX=3702 GN=OPR3 PE=1 SV=2;	PF00724.21	Oxidored_FMN	NAD
AT5G56840		At5g56840 [Source:UniProtKB/TrEMBL;Acc:Q9FJS9]	4.433	2.14831	8.67437e-14	1.82145e-12	yes	up	1.51	2.17	1.48	10.42	9.74	7.99	1.72	9.38333	GO:0006355;GO:0005634;GO:0016021;GO:0003700;GO:0008270;GO:0003676;GO:000367	BP:regulation of transcription, DNA-templated;CC:nucleus;CC:integral component of membrane;MF:transcription factor activity, sequence-specific DNA binding;MF:zinc ion binding;MF:nucleic acid binding;MF:DNA binding;	------	------	------	------	ENOG410YK2X	K:Transcription	NP_200495.1	myb-like transcription factor family protein [Arabidopsis thaliana]	sp|Q7XC57|MYBS3_ORYSJ;	Transcription factor MYBS3 OS=Oryza sativa subsp. japonica OX=39947 GN=MYBS3 PE=2 SV=1;	PF00249.32	Myb_DNA-binding	Myb-like DNA-binding domain
AT4G17490	ERF6	Ethylene-responsive transcription factor 6 [Source:UniProtKB/Swiss-Prot;Acc:Q8VZ91]	4.426	2.14613	4.23268e-06	2.96453e-05	yes	up	13.67	23.18	41.49	128.83	158.43	141.24	26.1133	142.833	GO:0010200;GO:0009873;GO:0009624;GO:0000302;GO:0006952;GO:0006355;GO:0010087;GO:0009644;GO:0051301;GO:0005634;GO:0044212;GO:0003700;GO:0000976;GO:0005515;GO:0003677;GO:000823	BP:response to chitin;BP:ethylene-activated signaling pathway;BP:response to nematode;BP:response to reactive oxygen species;BP:defense response;BP:regulation of transcription, DNA-templated;BP:phloem or xylem histogenesis;BP:response to high light intensity;BP:cell division;CC:nucleus;MF:transcription regulatory region DNA binding;MF:transcription factor activity, sequence-specific DNA binding;M…	K09286	EREBP	------	------	ENOG410YIK7;ENOG410Z37D	K:Transcription;	NP_567529.1	ethylene responsive element binding factor 6 [Arabidopsis thaliana]	sp|Q8VZ91|EF103_ARATH;	Ethylene-responsive transcription factor 6 OS=Arabidopsis thaliana OX=3702 GN=ERF6 PE=2 SV=2;	PF00847.21	AP2	AP2 domain
AT1G72900		Similar to part of disease resistance protein [Source:UniProtKB/TrEMBL;Acc:Q9SSN6]	4.421	2.14442	1.16433e-61	6.10026e-59	yes	up	32.59	27.26	39.38	180.71	167.87	189.44	33.0767	179.34	GO:0007165;GO:0071456;GO:0016787;GO:0043531;GO:0005515;GO:0050135;GO:0003953;GO:006180	BP:signal transduction;BP:cellular response to hypoxia;MF:hydrolase activity;MF:ADP binding;MF:protein binding;MF:NA;MF:NAD+ nucleosidase activity;MF:NAD+ nucleotidase, cyclic ADP-ribose generating;	------	------	------	------	------	------	NP_177433.1	Toll-Interleukin-Resistance (TIR) domain-containing protein [Arabidopsis thaliana]	sp|Q9SSN3|TIR_ARATH;	Toll/interleukin-1 receptor-like protein OS=Arabidopsis thaliana OX=3702 GN=TIR PE=1 SV=1;	PF01582.21;PF13676.7;PF00931.23	TIR;TIR_2;NB-ARC	TIR domain;TIR domain;NB-ARC domain
AT2G31270	CDT1A	CDT1-like protein a, chloroplastic [Source:UniProtKB/Swiss-Prot;Acc:Q9SJW9]	4.418	2.14337	3.98485e-12	6.97624e-11	yes	up	0.59	0.56	0.52	3.17	3.01	2.94	0.556667	3.04	GO:0000076;GO:0071163;GO:0051276;GO:0048229;GO:0009658;GO:0030174;GO:0006260;GO:0007049;GO:0000278;GO:0009536;GO:0005634;GO:0009507;GO:0019901;GO:0070182;GO:0005515;GO:0003677;GO:000469	BP:DNA replication checkpoint;BP:DNA replication preinitiation complex assembly;BP:chromosome organization;BP:gametophyte development;BP:chloroplast organization;BP:regulation of DNA-dependent DNA replication initiation;BP:DNA replication;BP:cell cycle;BP:mitotic cell cycle;CC:plastid;CC:nucleus;CC:chloroplast;MF:protein kinase binding;MF:DNA polymerase binding;MF:protein binding;MF:DNA binding;M…	K10727	CDT1	------	------	ENOG410XT37	S:Function unknown	NP_180685.1	CDT1-like protein A [Arabidopsis thaliana]	sp|Q9SJW9|CDT1A_ARATH;	CDT1-like protein a, chloroplastic OS=Arabidopsis thaliana OX=3702 GN=CDT1A PE=1 SV=1;	PF16679.6;PF08839.12	CDT1_C;CDT1	DNA replication factor Cdt1 C-terminal domain;DNA replication factor CDT1 like
AT4G21850	MSRB9	MSRB9 [Source:UniProtKB/TrEMBL;Acc:A0A178V287]	4.414	2.14192	1.5432e-07	1.39518e-06	yes	up	5.69	2.78	1.38	11.43	15.98	25.21	3.28333	17.54	GO:0006979;GO:0055114;GO:0030091;GO:0005737;GO:0005829;GO:0033743;GO:0046872;GO:0016671;GO:001649	BP:response to oxidative stress;BP:oxidation-reduction process;BP:protein repair;CC:cytoplasm;CC:cytosol;MF:peptide-methionin;MF:metal ion binding;MF:oxidoreductase activity, acting on a sulfur group of donors, disulfide as acceptor;MF:oxidoreductase activity;	K07305	msrB	------	------	COG0229	O:Posttranslational modification, protein turnover, chaperones	NP_567638.1	methionine sulfoxide reductase B9 [Arabidopsis thaliana]	sp|Q84JT6|MSRB9_ARATH;	Peptide methionine sulfoxide reductase B9 OS=Arabidopsis thaliana OX=3702 GN=MSRB9 PE=2 SV=1;	PF01641.19	SelR	SelR domain
AT1G35210		Uncharacterized protein T32G9.25 [Source:UniProtKB/TrEMBL;Acc:Q9C6F2]	4.405	2.13905	1.08923e-15	2.88505e-14	yes	up	2.25	3.22	3.36	19.92	15.55	12.25	2.94333	15.9067	GO:0010224;GO:0016021;GO:000551	BP:response to UV-B;CC:integral component of membrane;MF:protein binding;	------	------	------	------	ENOG410Z68U	S:Function unknown	AAO39913.1	At1g35210 [Arabidopsis thaliana]	------	------	PF05340.13	DUF740	Protein of unknown function
AT5G59680		Probable LRR receptor-like serine/threonine-protein kinase At5g59680 [Source:UniProtKB/Swiss-Prot;Acc:Q9FN93]	4.397	2.13662	7.82342e-06	5.19168e-05	yes	up	0.3	0.13	0.13	0.77	1.24	1.03	0.186667	1.01333	GO:0006468;GO:0016310;GO:0016021;GO:0016020;GO:0016301;GO:0000166;GO:0004674;GO:0016740;GO:0106311;GO:0005515;GO:0004672;GO:0005524;GO:010631	BP:protein phosphorylation;BP:phosphorylation;CC:integral component of membrane;CC:membrane;MF:kinase activity;MF:nucleotide binding;MF:protein serine/threonine kinase activity;MF:transferase activity;MF:old GO;MF:protein binding;MF:protein kinase activity;MF:ATP binding;MF:old GO;	------	------	------	------	COG0515	T:Signal transduction mechanisms	NP_200776.2	Leucine-rich repeat protein kinase family protein [Arabidopsis thaliana]	sp|Q9FN93|Y5596_ARATH;	Probable LRR receptor-like serine/threonine-protein kinase At5g59680 OS=Arabidopsis thaliana OX=3702 GN=At5g59680 PE=1 SV=1;	PF12819.8;PF00069.26;PF07714.18;PF13855.7;PF12799.8	Malectin_like;Pkinase;PK_Tyr_Ser-Thr;LRR_8;LRR_4	Malectin-like domain;Protein kinase domain;Protein tyrosine and serine/threonine kinase;Leucine rich repeat;Leucine Rich repeats
AT1G65484		unknown protein; FUNCTIONS IN: molecular_function unknown; INVOLVED IN: biological_process unknown; LOCATED IN: endomembrane system; Ha. [Source:TAIR;Acc:AT1G65484]	4.392	2.13481	0.0103086	0.0305813	yes	up	0.24	0.95	0.74	1.36	2.97	2.27	0.643333	2.2	GO:0009751;GO:0009723;GO:0009414;GO:0005794;GO:0097038;GO:0005783;GO:0099503;GO:0016021;GO:0005886;GO:000367	BP:response to salicylic acid;BP:response to ethylene;BP:response to water deprivation;CC:Golgi apparatus;CC:perinuclear endoplasmic reticulum;CC:endoplasmic reticulum;CC:secretory vesicle;CC:integral component of membrane;CC:plasma membrane;MF:molecular_function;	------	------	------	------	------	------	NP_001117550.1	transmembrane protein [Arabidopsis thaliana]	------	------	------	------	------
AT2G46210	SLD2	Delta(8)-fatty-acid desaturase 2 [Source:UniProtKB/Swiss-Prot;Acc:Q3EBF7]	4.387	2.13336	0.0173425	0.0474865	yes	up	0.52	0.05	0	0.8	1.46	0.8	0.19	1.02	GO:0030148;GO:0006629;GO:0070417;GO:0006665;GO:0016021;GO:0016020;GO:0005789;GO:0005783;GO:0046872;GO:0052631;GO:001649	BP:sphingolipid biosynthetic process;BP:lipid metabolic process;BP:cellular response to cold;BP:sphingolipid metabolic process;CC:integral component of membrane;CC:membrane;CC:endoplasmic reticulum membrane;CC:endoplasmic reticulum;MF:metal ion binding;MF:sphingolipid delta-8 desaturase activity;MF:oxidoreductase activity;	K21734	SLD	------	------	ENOG410XVSZ	I:Lipid transport and metabolism	NP_182144.1	Fatty acid/sphingolipid desaturase [Arabidopsis thaliana]	sp|Q3EBF7|SLD2_ARATH;	Delt;	PF00487.25;PF00173.29	FA_desaturase;Cyt-b5	Fatty acid desaturase;Cytochrome b5-like Heme/Steroid binding domain
AT1G51913		Putative uncharacterized protein [Source:UniProtKB/TrEMBL;Acc:Q1G3Z2]	4.378	2.13011	0.0056193	0.0181653	yes	up	0.37	3.14	4.13	11.88	22.73	5.74	2.54667	13.45	GO:001602	CC:integral component of membrane;	------	------	------	------	ENOG41107MY	S:Function unknown	NP_001077700.1	transmembrane protein [Arabidopsis thaliana]	------	------	------	------	------
AT5G60490	FLA12	Fasciclin-like arabinogalactan protein 12 [Source:UniProtKB/Swiss-Prot;Acc:Q8LEE9]	4.369	2.12743	1.21313e-06	9.5211e-06	yes	up	0.55	0.52	0.39	2.74	2.85	2.24	0.486667	2.61	GO:0009834;GO:0031225;GO:0016020;GO:000588	BP:plant-type secondary cell wall biogenesis;CC:anchored component of membrane;CC:membrane;CC:plasma membrane;	------	------	------	------	ENOG41106XV	G:Carbohydrate transport and metabolism	NP_200857.1	FASCICLIN-like arabinogalactan-protein 12 [Arabidopsis thaliana]	sp|Q8LEE9|FLA12_ARATH;	Fasciclin-like arabinogalactan protein 12 OS=Arabidopsis thaliana OX=3702 GN=FLA12 PE=2 SV=2;	PF02469.23	Fasciclin	Fasciclin domain
AT5G60780	NRT2.3	High affinity nitrate transporter 2.3 [Source:UniProtKB/Swiss-Prot;Acc:Q9FJH7]	4.366	2.12633	4.83982e-05	0.000269546	yes	up	0.48	0.49	0.09	2.33	1.59	1.75	0.353333	1.89	GO:0015706;GO:0042128;GO:0055085;GO:0071249;GO:0016021;GO:0016020;GO:0009705;GO:0005886;GO:0022857;GO:001511	BP:nitrate transport;BP:nitrate assimilation;BP:transmembrane transport;BP:cellular response to nitrate;CC:integral component of membrane;CC:membrane;CC:plant-type vacuole membrane;CC:plasma membrane;MF:transmembrane transporter activity;MF:nitrate transmembrane transporter activity;	K02575	NRT, narK, nrtP, nasA	map00910	Nitrogen metabolism	COG2223	P:Inorganic ion transport and metabolism	NP_200886.1	nitrate transporter 2.3 [Arabidopsis thaliana]	sp|Q9FJH7|NRT23_ARATH;	High affinity nitrate transporter 2.3 OS=Arabidopsis thaliana OX=3702 GN=NRT2.3 PE=1 SV=1;	PF07690.17	MFS_1	Major Facilitator Superfamily
AT4G21390	B120	B120 [Source:UniProtKB/TrEMBL;Acc:A0A178USE7]	4.358	2.1237	5.17266e-10	6.9883e-09	yes	up	0.8	0.8	0.66	2.81	6.36	2.98	0.753333	4.05	GO:0006468;GO:0016310;GO:0045087;GO:0048544;GO:0016020;GO:0016021;GO:0005886;GO:0106310;GO:0004672;GO:0030246;GO:0106311;GO:0000166;GO:0004674;GO:0016740;GO:0005516;GO:0016301;GO:000552	BP:protein phosphorylation;BP:phosphorylation;BP:innate immune response;BP:recognition of pollen;CC:membrane;CC:integral component of membrane;CC:plasma membrane;CC:old GO;MF:protein kinase activity;MF:carbohydrate binding;MF:old GO;MF:nucleotide binding;MF:protein serine/threonine kinase activity;MF:transferase activity;MF:calmodulin binding;MF:kinase activity;MF:ATP binding;	------	------	------	------	COG0515	T:Signal transduction mechanisms	NP_193870.1	S-locus lectin protein kinase family protein [Arabidopsis thaliana]	sp|O81906|B120_ARATH;	G-type lectin S-receptor-like serine/threonine-protein kinase B120 OS=Arabidopsis thaliana OX=3702 GN=B120 PE=2 SV=1;	PF07714.18;PF00069.26;PF01453.25;PF00954.21;PF08276.12	PK_Tyr_Ser-Thr;Pkinase;B_lectin;S_locus_glycop;PAN_2	Protein tyrosine and serine/threonine kinase;Protein kinase domain;D-mannose binding lectin;S-locus glycoprotein domain;PAN-like domain
AT5G42380	CML37	Calcium-binding protein CML37 [Source:UniProtKB/Swiss-Prot;Acc:Q9FIH9]	4.353	2.12197	0.000261862	0.00122417	yes	up	0.93	0.52	0.56	1.41	7.07	2.23	0.67	3.57	GO:0019722;GO:0050790;GO:0000226;GO:0010193;GO:0071456;GO:0005737;GO:0005634;GO:0005515;GO:0005509;GO:0046872;GO:003023	BP:calcium-mediated signaling;BP:regulation of catalytic activity;BP:microtubule cytoskeleton organization;BP:response to ozone;BP:cellular response to hypoxia;CC:cytoplasm;CC:nucleus;MF:protein binding;MF:calcium ion binding;MF:metal ion binding;MF:enzyme regulator activity;	K13448	CML	map04626	Plant-pathogen interaction	COG5126	P:Inorganic ion transport and metabolism	NP_199053.1	calmodulin like 37 [Arabidopsis thaliana]	sp|Q9FIH9|CML37_ARATH;	Calcium-binding protein CML37 OS=Arabidopsis thaliana OX=3702 GN=CML37 PE=2 SV=1;	PF13833.7;PF13499.7;PF00036.33;PF13405.7;PF13202.7;PF12763.8;PF10591.10	EF-hand_8;EF-hand_7;EF-hand_1;EF-hand_6;EF-hand_5;EF-hand_4;SPARC_Ca_bdg	EF-hand domain pair;EF-hand domain pair;EF hand;EF-hand domain;EF hand;Cytoskeletal-regulatory complex EF hand;Secreted protein acidic and rich in cysteine Ca binding region
AT3G46490		2-oxoglutarate (2OG) and Fe(II)-dependent oxygenase superfamily protein [Source:UniProtKB/TrEMBL;Acc:F4J938]	4.341	2.11818	2.52667e-36	3.26961e-34	yes	up	10.6	6.64	6.76	43.51	36.84	45.09	8	41.8133	GO:0055114;GO:0046872;GO:0051213;GO:001649	BP:oxidation-reduction process;MF:metal ion binding;MF:dioxygenase activity;MF:oxidoreductase activity;	------	------	------	------	COG3491	S:Function unknown	NP_190233.2	2-oxoglutarate (2OG) and Fe(II)-dependent oxygenase superfamily protein [Arabidopsis thaliana]	sp|C8VK14|HXNY_EMENI;	2-oxoglutarate-F;	PF14226.7;PF03171.21	DIOX_N;2OG-FeII_Oxy	non-haem dioxygenase in morphine synthesis N-terminal;2OG-F
AT2G22200	ERF056	Ethylene-responsive transcription factor ERF056 [Source:UniProtKB/Swiss-Prot;Acc:Q9SIE4]	4.332	2.11503	1.81541e-05	0.000111643	yes	up	0.43	0.37	0.39	2.21	1.64	2.44	0.396667	2.09667	GO:0006355;GO:0009873;GO:0006096;GO:0005634;GO:0043565;GO:0003700;GO:0003677;GO:000433	BP:regulation of transcription, DNA-templated;BP:ethylene-activated signaling pathway;BP:glycolytic process;CC:nucleus;MF:sequence-specific DNA binding;MF:transcription factor activity, sequence-specific DNA binding;MF:DNA binding;MF:fructose-bisphosphate aldolase activity;	K09286	EREBP	------	------	ENOG4111XTC;ENOG410YGN6	G:Carbohydrate transport and metabolism;K:Transcription	NP_179810.1	Integrase-type DNA-binding superfamily protein [Arabidopsis thaliana]	sp|Q9SIE4|ERF56_ARATH;	Ethylene-responsive transcription factor ERF056 OS=Arabidopsis thaliana OX=3702 GN=ERF056 PE=2 SV=1;	PF00847.21	AP2	AP2 domain
AT3G25780	AOC3	Allene oxide cyclase 3, chloroplastic [Source:UniProtKB/Swiss-Prot;Acc:Q9LS01]	4.326	2.11307	3.67924e-08	3.70008e-07	yes	up	0.81	0.58	0.65	2.31	4.39	4.1	0.68	3.6	GO:0009620;GO:0009695;GO:0009536;GO:0005774;GO:0005886;GO:0009507;GO:0046423;GO:001685	BP:response to fungus;BP:jasmonic acid biosynthetic process;CC:plastid;CC:vacuolar membrane;CC:plasma membrane;CC:chloroplast;MF:allene-oxide cyclase activity;MF:isomerase activity;	K10525	AOC	map00592	alpha-Linolenic acid metabolism	ENOG4111X07	S:Function unknown	NP_566777.1	allene oxide cyclase 3 [Arabidopsis thaliana]	sp|Q9LS01|AOC3_ARATH;	Allene oxide cyclase 3, chloroplastic OS=Arabidopsis thaliana OX=3702 GN=AOC3 PE=2 SV=1;	PF06351.12;PF03018.15	Allene_ox_cyc;Dirigent	Allene oxide cyclase;Dirigent-like protein
AT4G33490		Eukaryotic aspartyl protease family protein [Source:UniProtKB/TrEMBL;Acc:Q8LCW1]	4.323	2.11211	1.25586e-12	2.31365e-11	yes	up	4.73	1.89	1.88	14.97	17.39	13.55	2.83333	15.3033	GO:0006508;GO:0030163;GO:0008233;GO:0004190;GO:001678	BP:proteolysis;BP:protein catabolic process;MF:peptidase activity;MF:aspartic-type endopeptidase activity;MF:hydrolase activity;	------	------	------	------	ENOG410XNV7	S:Function unknown	NP_001190905.1	Eukaryotic aspartyl protease family protein [Arabidopsis thaliana]	sp|Q0IU52|ASP1_ORYSJ;	Aspartic proteinase Asp1 OS=Oryza sativa subsp. japonica OX=39947 GN=ASP1 PE=2 SV=1;	PF14543.7;PF00026.24;PF14541.7	TAXi_N;Asp;TAXi_C	Xylanase inhibitor N-terminal;Eukaryotic aspartyl protease;Xylanase inhibitor C-terminal
AT3G07960	PIP5K6	PIP5K6 [Source:UniProtKB/TrEMBL;Acc:A0A384KKN2]	4.316	2.1097	0.000860298	0.00352471	yes	up	0.14	0.08	0.07	0.64	0.46	0.48	0.0966667	0.526667	GO:0072583;GO:0016310;GO:0046488;GO:0046854;GO:0016324;GO:0090406;GO:0016308;GO:0016301;GO:0016307;GO:0000166;GO:0016740;GO:000552	BP:clathrin-dependent endocytosis;BP:phosphorylation;BP:phosphatidylinositol metabolic process;BP:phosphatidylinositol phosphorylation;CC:apical plasma membrane;CC:pollen tube;MF:1-phosphatidylinositol-4-phosphate 5-kinase activity;MF:kinase activity;MF:phosphatidylinositol phosphate kinase activity;MF:nucleotide binding;MF:transferase activity;MF:ATP binding;	K00889	PIP5K	map04070;map04144;map00562	Phosphatidylinositol signaling system;Endocytosis;Inositol phosphate metabolism	COG5253	S:Function unknown	NP_187453.1	Phosphatidylinositol-4-phosphate 5-kinase family protein [Arabidopsis thaliana]	sp|Q9SFB8|PI5K6_ARATH;	Phosphatidylinositol 4-phosphate 5-kinase 6 OS=Arabidopsis thaliana OX=3702 GN=PIP5K6 PE=2 SV=1;	PF01504.19;PF02493.21	PIP5K;MORN	Phosphatidylinositol-4-phosphate 5-Kinase;MORN repeat
AT5G41460		At5g41460 [Source:UniProtKB/TrEMBL;Acc:Q9FN55]	4.315	2.10949	1.55272e-06	1.18697e-05	yes	up	0.64	0.51	0.16	2.31	2.63	2.04	0.436667	2.32667	GO:0016021;GO:0016020;GO:0008375;GO:001674	CC:integral component of membrane;CC:membrane;MF:acetylglucosaminyltransferase activity;MF:transferase activity;	------	------	------	------	ENOG410YRJG	O:Posttranslational modification, protein turnover, chaperones	NP_198961.1	transferring glycosyl group transferase (DUF604) [Arabidopsis thaliana]	------	------	PF04646.13;PF02434.17	DUF604;Fringe	Protein of unknown function, DUF604;Fringe-like
AT5G58390	PER67	Peroxidase [Source:UniProtKB/TrEMBL;Acc:A0A178UMG0]	4.305	2.10588	1.55374e-31	1.5818e-29	yes	up	5.95	6.9	4.7	34.71	26.85	31.31	5.85	30.9567	GO:0006979;GO:0098869;GO:0042744;GO:0055114;GO:0005773;GO:0005576;GO:0020037;GO:0046872;GO:0004601;GO:001649	BP:response to oxidative stress;BP:cellular oxidant detoxification;BP:hydrogen peroxide catabolic process;BP:oxidation-reduction process;CC:vacuole;CC:extracellular region;MF:heme binding;MF:metal ion binding;MF:peroxidase activity;MF:oxidoreductase activity;	K00430	E1.11.1.7	map00940	Phenylpropanoid biosynthesis	ENOG410YAKJ	G:Carbohydrate transport and metabolism	NP_200647.1	Peroxidase superfamily protein [Arabidopsis thaliana]	sp|Q9LVL2|PER67_ARATH;	Peroxidase 67 OS=Arabidopsis thaliana OX=3702 GN=PER67 PE=2 SV=1;	PF00141.24	peroxidase	Peroxidase
AT3G09870		F8A24.8 protein [Source:UniProtKB/TrEMBL;Acc:Q9SF89]	4.304	2.10575	0.0136294	0.0389481	yes	up	0.83	0.16	0.66	3.58	3.15	1.71	0.55	2.81333	GO:0009733;GO:000367	BP:response to auxin;MF:molecular_function;	K14488	SAUR	map04075	Plant hormone signal transduction	ENOG411175A	S:Function unknown	NP_187598.1	SAUR-like auxin-responsive protein family [Arabidopsis thaliana]	sp|P33083|AX6B_SOYBN;	Auxin-induced protein 6B OS=Glycine max OX=3847 PE=2 SV=1;	PF02519.15	Auxin_inducible	Auxin responsive protein
AT1G67810	SUFE2	SufE-like protein 2, chloroplastic [Source:UniProtKB/Swiss-Prot;Acc:Q9FXE3]	4.302	2.10485	8.90829e-30	8.0403e-28	yes	up	9.83	7.35	7.03	33.2	49.46	44.69	8.07	42.45	GO:0050790;GO:0016226;GO:0051176;GO:0009536;GO:0009507;GO:000804	BP:regulation of catalytic activity;BP:iron-sulfur cluster assembly;BP:positive regulation of sulfur metabolic process;CC:plastid;CC:chloroplast;MF:enzyme activator activity;	------	------	------	------	COG2166	S:Function unknown	NP_176947.1	sulfur E2 [Arabidopsis thaliana]	sp|Q9FXE3|SUFE2_ARATH;	SufE-like protein 2, chloroplastic OS=Arabidopsis thaliana OX=3702 GN=SUFE2 PE=2 SV=1;	PF02657.16	SufE	Fe-S metabolism associated domain
AT5G05270	CHI3	Probable chalcone--flavonone isomerase 3 [Source:UniProtKB/Swiss-Prot;Acc:Q8VZW3]	4.299	2.10386	4.95842e-05	0.000275627	yes	up	0.69	0.3	0.31	1.97	2.22	2.25	0.433333	2.14667	GO:0009813;GO:0080167;GO:0016872;GO:0045430;GO:001685	BP:flavonoid biosynthetic process;BP:response to karrikin;MF:intramolecular lyase activity;MF:chalcone isomerase activity;MF:isomerase activity;	K01859	E5.5.1.6	map00941	Flavonoid biosynthesis	ENOG4111ZUZ	S:Function unknown	NP_568154.1	Chalcone-flavanone isomerase family protein [Arabidopsis thaliana]	sp|Q8VZW3|CFI3_ARATH;	Probable chalcone--flavonone isomerase 3 OS=Arabidopsis thaliana OX=3702 GN=CHI3 PE=1 SV=1;	PF02431.16	Chalcone	Chalcone-flavanone isomerase
AT2G25440	AtRLP20	Receptor-like protein 20 [Source:UniProtKB/Swiss-Prot;Acc:Q9SKK5]	4.295	2.1025	0.00367605	0.0125961	yes	up	0.06	0.21	0.34	0.41	1.84	0.41	0.203333	0.886667	GO:0050832;GO:0002240;GO:0002758;GO:0010555;GO:0002237;GO:0042742;GO:0002238;GO:0032491;GO:0002229;GO:0016021;GO:0016020;GO:0005886;GO:0005783;GO:0019901;GO:000551	BP:defense response to fungus;BP:response to molecule of oomycetes origin;BP:innate immune response-activating signal transduction;BP:response to mannitol;BP:response to molecule of bacterial origin;BP:defense response to bacterium;BP:response to molecule of fungal origin;BP:detection of molecule of fungal origin;BP:defense response to oomycetes;CC:integral component of membrane;CC:membrane;CC:pl…	------	------	------	------	COG4886	S:Function unknown	NP_180114.1	receptor like protein 20 [Arabidopsis thaliana]	sp|Q9SKK5|RLP20_ARATH;	Receptor-like protein 20 OS=Arabidopsis thaliana OX=3702 GN=RLP20 PE=3 SV=1;	PF13855.7;PF12799.8	LRR_8;LRR_4	Leucine rich repeat;Leucine Rich repeats
AT5G10830		At5g10830 [Source:UniProtKB/TrEMBL;Acc:Q9LEV6]	4.266	2.09274	4.61682e-06	3.20019e-05	yes	up	1.08	0.75	0.28	4.13	4.1	2.95	0.703333	3.72667	GO:0032259;GO:0008168;GO:001674	BP:methylation;MF:methyltransferase activity;MF:transferase activity;	------	------	------	------	ENOG4111IQH	G:Carbohydrate transport and metabolism	NP_196644.1	S-adenosyl-L-methionine-dependent methyltransferases superfamily protein [Arabidopsis thaliana]	sp|Q55EX9|Y8948_DICDI;	Putative methyltransferase DDB_G0268948 OS=Dictyostelium discoideum OX=44689 GN=DDB_G0268948 PE=1 SV=2;	PF08241.13;PF13649.7;PF08242.13	Methyltransf_11;Methyltransf_25;Methyltransf_12	Methyltransferase domain;Methyltransferase domain;Methyltransferase domain
AT1G51440		Phospholipase A1-Igamma3, chloroplastic [Source:UniProtKB/Swiss-Prot;Acc:Q9C8J6]	4.261	2.09114	0.016497	0.045573	yes	up	0.19	0.05	0.03	0.53	0.47	0.43	0.09	0.476667	GO:0006629;GO:0016042;GO:0009536;GO:0009507;GO:0016787;GO:0004806;GO:0008970;GO:0047714;GO:000462	BP:lipid metabolic process;BP:lipid catabolic process;CC:plastid;CC:chloroplast;MF:hydrolase activity;MF:triglyceride lipase activity;MF:phosphatidylcholine 1-acylhydrolase activity;MF:galactolipase activity;MF:phospholipase activity;	------	------	------	------	ENOG4111RPC;COG3675	O:Posttranslational modification, protein turnover, chaperones;	NP_564590.1	alpha/beta-Hydrolases superfamily protein [Arabidopsis thaliana]	sp|Q9C8J6|PLA17_ARATH;	Phospholipase A1-Igamma3, chloroplastic OS=Arabidopsis thaliana OX=3702 GN=At1g51440 PE=1 SV=1;	PF01764.26	Lipase_3	Lipase
AT1G26960	ATHB-23	Homeobox-leucine zipper protein ATHB-23 [Source:UniProtKB/Swiss-Prot;Acc:Q8LFD3]	4.261	2.09107	2.60254e-08	2.69033e-07	yes	up	0.61	0.71	0.76	3.6	3.36	3.93	0.693333	3.63	GO:0010311;GO:0006355;GO:0006357;GO:0045893;GO:0048527;GO:0009739;GO:0005634;GO:0043565;GO:0044212;GO:0003700;GO:0000976;GO:0003677;GO:000098	BP:lateral root formation;BP:regulation of transcription, DNA-templated;BP:regulation of transcription from RNA polymerase II promoter;BP:positive regulation of transcription, DNA-templated;BP:lateral root development;BP:response to gibberellin;CC:nucleus;MF:sequence-specific DNA binding;MF:transcription regulatory region DNA binding;MF:transcription factor activity, sequence-specific DNA binding…	K09338	HD-ZIP	------	------	ENOG410Z2UE	K:Transcription	NP_564268.1	homeobox protein 23 [Arabidopsis thaliana]	sp|Q8LFD3|ATB23_ARATH;	Homeobox-leucine zipper protein ATHB-23 OS=Arabidopsis thaliana OX=3702 GN=ATHB-23 PE=2 SV=1;	PF02183.19;PF00046.30	HALZ;Homeodomain	Homeobox associated leucine zipper;Homeodomain
AT3G04290	LTL1	LTL1 [Source:UniProtKB/TrEMBL;Acc:A0A178VLC7]	4.258	2.09022	6.13658e-29	5.18976e-27	yes	up	8.4	5.79	4.72	32.67	36.83	29.19	6.30333	32.8967	GO:0009751;GO:0006629;GO:0016042;GO:0010226;GO:0042538;GO:0005576;GO:0016787;GO:0016788;GO:000551	BP:response to salicylic acid;BP:lipid metabolic process;BP:lipid catabolic process;BP:response to lithium ion;BP:hyperosmotic salinity response;CC:extracellular region;MF:hydrolase activity;MF:hydrolase activity, acting on ester bonds;MF:protein binding;	------	------	------	------	COG3240	T:Signal transduction mechanisms	NP_187079.1	Li-tolerant lipase 1 [Arabidopsis thaliana]	sp|Q9M8Y5|LTL1_ARATH;	GDSL esterase/lipase LTL1 OS=Arabidopsis thaliana OX=3702 GN=LTL1 PE=2 SV=1;	PF00657.23	Lipase_GDSL	GDSL-like Lipase/Acylhydrolase
AT1G08477		-	4.248	2.08684	1.10846e-22	6.01286e-21	yes	up	17.51	8.83	10.83	55.74	70.35	63.84	12.39	63.31	GO:0019419;GO:0019344;GO:0019379;GO:0045454;GO:0000103;GO:0009570;GO:0005623;GO:0009507;GO:0033741;GO:0016671;GO:0009973;GO:000460	BP:sulfate reduction;BP:cysteine biosynthetic process;BP:sulfate assimilation, phosphoadenylyl sulfate reduction by phosphoadenylyl-sulfate reductas;BP:cell redox homeostasis;BP:sulfate assimilation;CC:chloroplast stroma;CC:cell;CC:chloroplast;MF:adenylyl-sulfate reductas;MF:oxidoreductase activity, acting on a sulfur group of donors, disulfide as acceptor;MF:adenylyl-sulfate reductase activity;M…	K05907	APR	map00920	Sulfur metabolism	COG0175	P:Inorganic ion transport and metabolism	AAB80957.1	adenosine-5'-phosphosulfate reductase [Arabidopsis thaliana]	sp|P92981|APR2_ARATH;	5'-adenylylsulfate reductase 2, chloroplastic OS=Arabidopsis thaliana OX=3702 GN=APR2 PE=1 SV=2;	------	------	------
AT5G52310	RD29A	Low-temperature-induced 78 kDa protein [Source:UniProtKB/Swiss-Prot;Acc:Q06738]	4.233	2.08173	8.24659e-17	2.44675e-15	yes	up	1.51	0.84	0.98	6.76	5.17	5.36	1.11	5.76333	GO:0010150;GO:0007623;GO:0009737;GO:0009611;GO:2000280;GO:0000302;GO:0010555;GO:0006970;GO:0009414;GO:0009651;GO:0009409;GO:1902074;GO:0009609;GO:0042538;GO:0005737;GO:0009536;GO:0005829;GO:000367	BP:leaf senescence;BP:circadian rhythm;BP:response to abscisic acid;BP:response to wounding;BP:regulation of root development;BP:response to reactive oxygen species;BP:response to mannitol;BP:response to osmotic stress;BP:response to water deprivation;BP:response to salt stress;BP:response to cold;BP:response to salt;BP:response to symbiotic bacterium;BP:hyperosmotic salinity response;CC:cytoplas…	------	------	------	------	ENOG410ZG4Y	S:Function unknown	NP_200044.1	low-temperature-responsive protein 78 (LTI78) / desiccation-responsive protein 29A (RD29A) [Arabidopsis thaliana]	sp|Q06738|RD29A_ARATH;	Low-temperature-induced 78 kDa protein OS=Arabidopsis thaliana OX=3702 GN=RD29A PE=1 SV=2;	------	------	------
AT4G29780		Nuclease [Source:UniProtKB/TrEMBL;Acc:Q84J48]	4.229	2.08023	1.07736e-17	3.54408e-16	yes	up	2.87	2.51	3.71	15.51	21.33	10.59	3.03	15.81	GO:0071456;GO:0005575;GO:0046872;GO:000367	BP:cellular response to hypoxia;CC:cellular_component;MF:metal ion binding;MF:molecular_function;	K23222	HARBI1	------	------	ENOG411206Y	S:Function unknown	NP_567834.2	nuclease [Arabidopsis thaliana]	sp|Q9M2U3|ALPL_ARATH;	Protein ALP1-like OS=Arabidopsis thaliana OX=3702 GN=At3g55350 PE=2 SV=1;	PF13359.7	DDE_Tnp_4	DDE superfamily endonuclease
AT2G38390	PER23	Peroxidase 23 [Source:UniProtKB/Swiss-Prot;Acc:O80912]	4.209	2.07347	4.48309e-06	3.11957e-05	yes	up	0.62	0.48	0.38	2.98	1.97	2.68	0.493333	2.54333	GO:0006979;GO:0098869;GO:0042744;GO:0010043;GO:0055114;GO:0099503;GO:0005773;GO:0005576;GO:0020037;GO:0046872;GO:0004601;GO:001649	BP:response to oxidative stress;BP:cellular oxidant detoxification;BP:hydrogen peroxide catabolic process;BP:response to zinc ion;BP:oxidation-reduction process;CC:secretory vesicle;CC:vacuole;CC:extracellular region;MF:heme binding;MF:metal ion binding;MF:peroxidase activity;MF:oxidoreductase activity;	K00430	E1.11.1.7	map00940	Phenylpropanoid biosynthesis	ENOG411082W	G:Carbohydrate transport and metabolism	NP_181373.1	Peroxidase superfamily protein [Arabidopsis thaliana]	sp|O80912|PER23_ARATH;	Peroxidase 23 OS=Arabidopsis thaliana OX=3702 GN=PER23 PE=2 SV=1;	PF00141.24	peroxidase	Peroxidase
AT5G03120		unknown protein; FUNCTIONS IN: molecular_function unknown; INVOLVED IN: biological_process unknown; LOCATED IN: endomembrane system; EXPRESSED IN: 21 plant structures; EXPRESSED DURING: 13 growth stages; Ha. [Source:TAIR;Acc:AT5G03120]	4.205	2.07218	1.69137e-11	2.75453e-10	yes	up	2.99	2.74	1.51	14.82	8.67	12.81	2.41333	12.1	GO:0016021;GO:001602	CC:integral component of membrane;CC:membrane;	------	------	------	------	ENOG411195B	S:Function unknown	NP_001330592.1	transmembrane protein [Arabidopsis thaliana]	------	------	------	------	------
AT5G16530	PIN5	Auxin efflux carrier component [Source:UniProtKB/TrEMBL;Acc:A0A178UIR3]	4.2	2.07029	0.000275744	0.00128209	yes	up	0.42	0.32	0.24	2.18	1.95	1.03	0.326667	1.72	GO:0009555;GO:0009734;GO:0010252;GO:0010315;GO:0080162;GO:0009926;GO:0055085;GO:0016020;GO:0005783;GO:0016021;GO:0005789;GO:0005886;GO:0010329;GO:008016	BP:pollen development;BP:auxin-activated signaling pathway;BP:auxin homeostasis;BP:auxin efflux;BP:intracellular auxin transport;BP:auxin polar transport;BP:transmembrane transport;CC:membrane;CC:endoplasmic reticulum;CC:integral component of membrane;CC:endoplasmic reticulum membrane;CC:plasma membrane;MF:auxin efflux transmembrane transporter activity;MF:auxin transmembrane transporter activity;	K13947	PIN	------	------	ENOG410YAQ9	U:Intracellular trafficking, secretion, and vesicular transport	NP_197157.4	Auxin efflux carrier family protein [Arabidopsis thaliana]	sp|Q9FFD0|PIN5_ARATH;	Auxin efflux carrier component 5 OS=Arabidopsis thaliana OX=3702 GN=PIN5 PE=2 SV=2;	PF03547.19	Mem_trans	Membrane transport protein
AT1G62870		F16P17.2 protein [Source:UniProtKB/TrEMBL;Acc:Q9LQ19]	4.199	2.06998	0.00194371	0.00722242	yes	up	0.13	0.05	0.11	0.64	0.44	0.39	0.0966667	0.49	------	------	------	------	------	------	ENOG4110UCC	S:Function unknown	NP_176475.2	hypothetical protein AT1G62870 [Arabidopsis thaliana]	------	------	PF04937.16	DUF659	Protein of unknown function
AT5G63195		other RNA [Source:TAIR;Acc:AT5G63195]	4.197	2.06931	0.000130627	0.000658684	yes	up	0.24	0.49	0.22	1.62	1.41	1.85	0.316667	1.62667	GO:0045892;GO:0090549;GO:0006417;GO:0009646;GO:0005829;GO:0005634;GO:004302	BP:negative regulation of transcription, DNA-templated;BP:response to carbon starvation;BP:regulation of translation;BP:response to absence of light;CC:cytosol;CC:nucleus;MF:ribosome binding;	------	------	------	------	ENOG410XQZZ	S:Function unknown	BAB10561.1	topoisomerase-like protein [Arabidopsis thaliana]	sp|Q94BR1|MRF1_ARATH;	MA3 DOMAIN-CONTAINING TRANSLATION REGULATORY FACTOR 1 OS=Arabidopsis thaliana OX=3702 GN=MRF1 PE=1 SV=1;	------	------	------
AT5G56980	A70	unknown protein; FUNCTIONS IN: molecular_function unknown; INVOLVED IN: biological_process unknown; LOCATED IN: endomembrane system; EXPRESSED IN: 18 plant structures; EXPRESSED DURING: 12 growth stages; BEST Arabidopsis thaliana protein match is: u /.../ protein (TAIR:AT4G26130.1); Ha. [Source:TAIR;Acc:AT5G56980]	4.185	2.0653	2.73083e-18	9.49206e-17	yes	up	6.01	5.29	7.32	19.71	36.33	39.81	6.20667	31.95	GO:0009617;GO:0009753;GO:0009611;GO:0042742;GO:0016021;GO:001602	BP:response to bacterium;BP:response to jasmonic acid;BP:response to wounding;BP:defense response to bacterium;CC:integral component of membrane;CC:membrane;	------	------	------	------	ENOG410Z9QH	S:Function unknown	NP_568845.1	cotton fiber protein [Arabidopsis thaliana]	sp|F4K956|A70_ARATH;	Pathogen-associated molecular patterns-induced protein A70 OS=Arabidopsis thaliana OX=3702 GN=A70 PE=1 SV=1;	PF05553.12;PF14364.7	DUF761;DUF4408	Cotton fibre expressed protein;Domain of unknown function
AT5G51190	ERF105	Ethylene-responsive transcription factor ERF105 [Source:UniProtKB/Swiss-Prot;Acc:Q8VY90]	4.184	2.06486	2.21954e-17	7.0844e-16	yes	up	9.68	16.1	22	100.4	74.64	70.15	15.9267	81.73	GO:0010200;GO:0009873;GO:0006355;GO:0009408;GO:0005634;GO:0044212;GO:0003700;GO:0000976;GO:000367	BP:response to chitin;BP:ethylene-activated signaling pathway;BP:regulation of transcription, DNA-templated;BP:response to heat;CC:nucleus;MF:transcription regulatory region DNA binding;MF:transcription factor activity, sequence-specific DNA binding;MF:transcription regulatory region sequence-specific DNA binding;MF:DNA binding;	------	------	------	------	ENOG410YIK7	S:Function unknown	NP_568755.1	Integrase-type DNA-binding superfamily protein [Arabidopsis thaliana]	sp|Q8VY90|EF105_ARATH;	Ethylene-responsive transcription factor ERF105 OS=Arabidopsis thaliana OX=3702 GN=ERF105 PE=2 SV=1;	PF00847.21	AP2	AP2 domain
AT2G43100	IPMI2	IPMI2 [Source:UniProtKB/TrEMBL;Acc:A0A178VZE1]	4.179	2.06306	1.36854e-19	5.29685e-18	yes	up	8.6	7.06	4.82	29.62	45.63	29.49	6.82667	34.9133	GO:0008652;GO:0019761;GO:0009098;GO:0009082;GO:0009536;GO:0009570;GO:0009507;GO:0016829;GO:000386	BP:cellular amino acid biosynthetic process;BP:glucosinolate biosynthetic process;BP:leucine biosynthetic process;BP:branched-chain amino acid biosynthetic process;CC:plastid;CC:chloroplast stroma;CC:chloroplast;MF:lyase activity;MF:3-isopropylmalate dehydratase activity;	K21359	MAM-IS, IPMI2	map00966;map00290	Glucosinolate biosynthesis;Valine, leucine and isoleucine biosynthesis	COG0066	E:Amino acid transport and metabolism	NP_181838.1	isopropylmalate isomerase 2 [Arabidopsis thaliana]	sp|Q9ZW84|LEUD1_ARATH;	3-isopropylmalate dehydratase small subunit 2 OS=Arabidopsis thaliana OX=3702 GN=SSU2 PE=1 SV=1;	PF00694.20	Aconitase_C	Aconitase C-terminal domain
AT1G06420		DNA ligase-like protein [Source:UniProtKB/TrEMBL;Acc:Q9LMH9]	4.174	2.06131	0.00426182	0.0143335	yes	up	0.62	0.19	0.11	1.47	1.48	1.39	0.306667	1.44667	GO:0008150;GO:0005575;GO:001687	BP:biological_process;CC:cellular_component;MF:ligase activity;	------	------	------	------	ENOG411058P	S:Function unknown	NP_172130.1	DNA ligase-like protein [Arabidopsis thaliana]	------	------	------	------	------
AT1G24070	CSLA10	Probable glucomannan 4-beta-mannosyltransferase 10 [Source:UniProtKB/Swiss-Prot;Acc:Q9LR87]	4.172	2.0609	1.93827e-05	0.000118251	yes	up	0.23	0.34	0.21	1.29	1.11	1.53	0.26	1.31	GO:0097502;GO:0071555;GO:0005794;GO:0016021;GO:0016020;GO:0000139;GO:0047259;GO:0016740;GO:0051753;GO:001675	BP:mannosylation;BP:cell wall organization;CC:Golgi apparatus;CC:integral component of membrane;CC:membrane;CC:Golgi membrane;MF:glucomannan 4-beta-mannosyltransferase activity;MF:transferase activity;MF:mannan synthase activity;MF:transferase activity, transferring glycosyl groups;	------	------	------	------	COG1215	M:Cell wall/membrane/envelope biogenesis	NP_173818.1	cellulose synthase-like A10 [Arabidopsis thaliana]	sp|Q9LR87|CSLAA_ARATH;	Probable glucomannan 4-beta-mannosyltransferase 10 OS=Arabidopsis thaliana OX=3702 GN=CSLA10 PE=2 SV=2;	PF13641.7;PF13632.7;PF00535.27;PF13506.7	Glyco_tranf_2_3;Glyco_trans_2_3;Glycos_transf_2;Glyco_transf_21	Glycosyltransferase like family 2;Glycosyl transferase family group 2;Glycosyl transferase family 2;Glycosyl transferase family 21
AT2G22190	TPPE	Probable trehalose-phosphate phosphatase E [Source:UniProtKB/Swiss-Prot;Acc:Q67X99]	4.172	2.06077	3.58411e-08	3.61117e-07	yes	up	2.11	0.92	0.81	7.7	7.8	4.6	1.28	6.7	GO:0016311;GO:0005992;GO:0009507;GO:0016787;GO:0004805;GO:000382	BP:dephosphorylation;BP:trehalose biosynthetic process;CC:chloroplast;MF:hydrolase activity;MF:trehalose-phosphatase activity;MF:catalytic activity;	K01087	otsB	map00500	Starch and sucrose metabolism	COG1877	S:Function unknown	NP_179809.2	Haloacid dehalogenase-like hydrolase (HAD) superfamily protein [Arabidopsis thaliana]	sp|Q67X99|TPPE_ARATH;	Probable trehalose-phosphate phosphatase E OS=Arabidopsis thaliana OX=3702 GN=TPPE PE=2 SV=1;	PF02358.17	Trehalose_PPase	Trehalose-phosphatase
AT4G15620		CASP-like protein 1E2 [Source:UniProtKB/Swiss-Prot;Acc:O23413]	4.158	2.05597	1.50418e-09	1.9029e-08	yes	up	1.42	1.72	1.11	6.31	8.54	6.78	1.41667	7.21	GO:0042545;GO:0007043;GO:0016021;GO:0016020;GO:0048226;GO:0005886;GO:0009506;GO:0051539;GO:004342	BP:cell wall modification;BP:cell-cell junction assembly;CC:integral component of membrane;CC:membrane;CC:Casparian strip;CC:plasma membrane;CC:plasmodesma;MF:4 iron, 4 sulfur cluster binding;MF:protein histidine kinase binding;	------	------	------	------	ENOG410YQ35	S:Function unknown	NP_193297.1	Uncharacterized protein family (UPF0497) [Arabidopsis thaliana]	sp|O23413|CSPLN_ARATH;	CASP-like protein 1E2 OS=Arabidopsis thaliana OX=3702 GN=At4g15620 PE=2 SV=1;	PF04535.13	DUF588	Domain of unknown function
AT4G14750	IQD19	IQ-domain 19 [Source:TAIR;Acc:AT4G14750]	4.155	2.0547	8.45474e-11	1.26738e-09	yes	up	1.21	0.73	0.75	5.2	4.62	4.19	0.896667	4.67	GO:000551	MF:protein binding;	------	------	------	------	ENOG410Y92I	S:Function unknown	NP_001328647.1	IQ-domain 19 [Arabidopsis thaliana]	sp|Q9SD11|IQD20_ARATH;	Protein IQ-DOMAIN 20 OS=Arabidopsis thaliana OX=3702 GN=IQD20 PE=1 SV=1;	PF13178.7;PF00612.28	DUF4005;IQ	Protein of unknown function;IQ calmodulin-binding motif
AT3G46110		At3g46110 [Source:UniProtKB/TrEMBL;Acc:Q8GY65]	4.153	2.05413	2.35413e-08	2.4465e-07	yes	up	0.51	0.81	0.67	3.36	3.8	2.91	0.663333	3.35667	GO:0010928;GO:0010600;GO:0051258;GO:2000024;GO:2000067;GO:0051302;GO:0006970;GO:1905392;GO:0010229;GO:0090708;GO:1902074;GO:0005886;GO:0031234;GO:0005515;GO:004280	BP:regulation of auxin mediated signaling pathway;BP:regulation of auxin biosynthetic process;BP:protein polymerization;BP:regulation of leaf development;BP:regulation of root morphogenesis;BP:regulation of cell division;BP:response to osmotic stress;BP:plant organ morphogenesis;BP:inflorescence development;BP:specification of plant organ axis polarity;BP:response to salt;CC:plasma membrane;CC:ex…	------	------	------	------	ENOG410YDQZ	S:Function unknown	NP_190197.2	UPSTREAM OF FLC-like protein (DUF966) [Arabidopsis thaliana]	sp|Q9LX14|UFC_ARATH;	Protein UPSTREAM OF FLC OS=Arabidopsis thaliana OX=3702 GN=UFC PE=2 SV=1;	PF06136.14	DUF966	Domain of unknown function
AT3G14870		AT3G14870 protein [Source:UniProtKB/TrEMBL;Acc:Q9LKB7]	4.151	2.0535	2.86779e-15	7.19662e-14	yes	up	1.2	1.19	0.93	4.64	5.25	6.6	1.10667	5.49667	GO:0009639;GO:000995	BP:response to red or far red light;BP:negative gravitropism;	------	------	------	------	ENOG410YB2T	S:Function unknown	NP_188105.3	hypothetical protein (DUF641) [Arabidopsis thaliana]	sp|F4KGE8|GIL1_ARATH;	Protein GRAVITROPIC IN THE LIGHT 1 OS=Arabidopsis thaliana OX=3702 GN=GIL1 PE=2 SV=1;	PF04859.13	DUF641	Plant protein of unknown function
AT2G35640		Homeodomain-like superfamily protein [Source:UniProtKB/TrEMBL;Acc:Q9ZQN7]	4.142	2.05046	0.000725869	0.0030344	yes	up	0.61	0.34	0.16	1.43	2.04	2.14	0.37	1.87	GO:0006355;GO:0016021;GO:0003700;GO:000367	BP:regulation of transcription, DNA-templated;CC:integral component of membrane;MF:transcription factor activity, sequence-specific DNA binding;MF:DNA binding;	------	------	------	------	ENOG410YGIR	S:Function unknown	NP_181107.1	Homeodomain-like superfamily protein [Arabidopsis thaliana]	sp|Q8VZ20|ASR3_ARATH;	Trihelix transcription factor ASR3 OS=Arabidopsis thaliana OX=3702 GN=ASR3 PE=1 SV=1;	PF13837.7	Myb_DNA-bind_4	Myb/SANT-like DNA-binding domain
AT4G16807		unknown protein; FUNCTIONS IN: molecular_function unknown; INVOLVED IN: biological_process unknown; LOCATED IN: cellular_component unknown; BEST Arabidopsis thaliana protein match is: unknown protein (TAIR:AT3G33528.1); Ha. [Source:TAIR;Acc:AT4G16807]	4.142	2.05036	0.00131768	0.00515336	yes	up	0.13	0.29	0.17	0.74	1.25	1.07	0.196667	1.02	GO:0008150;GO:0006508;GO:0008233;GO:0046872;GO:000367	BP:biological_process;BP:proteolysis;MF:peptidase activity;MF:metal ion binding;MF:molecular_function;	------	------	------	------	ENOG410ZB13;COG1024	S:Function unknown;I:Lipid transport and metabolism	NP_001118995.1	ATP-dependent caseinolytic protease/crotonase family protein [Arabidopsis thaliana]	------	------	------	------	------
AT2G23010	SCPL9	SCPL9 [Source:UniProtKB/TrEMBL;Acc:A0A178W1Q9]	4.13	2.04608	0.000580459	0.0024789	yes	up	0.18	0.17	0.5	1.35	1.83	1.12	0.283333	1.43333	GO:0019748;GO:0006508;GO:0005576;GO:0004180;GO:0004185;GO:0047158;GO:001674	BP:secondary metabolic process;BP:proteolysis;CC:extracellular region;MF:carboxypeptidase activity;MF:serine-type carboxypeptidase activity;MF:sinapoylglucose-sinapoylglucose O-sinapoyltransferase activity;MF:transferase activity, transferring acyl groups other than amino-acyl groups;	K16296	SCPL-I	------	------	COG2939	E:Amino acid transport and metabolism	NP_973517.1	serine carboxypeptidase-like 9 [Arabidopsis thaliana]	sp|O64811|SCP9_ARATH;	Serine carboxypeptidase-like 9 OS=Arabidopsis thaliana OX=3702 GN=SCPL9 PE=2 SV=1;	PF00450.23	Peptidase_S10	Serine carboxypeptidase
AT5G53420		CCT motif family protein [Source:UniProtKB/TrEMBL;Acc:Q8L602]	4.127	2.04521	9.34691e-20	3.69083e-18	yes	up	17.77	10.66	7.16	63.34	56.27	56.35	11.8633	58.6533	GO:0090548;GO:0005634;GO:000551	BP:response to nitrate starvation;CC:nucleus;MF:protein binding;	------	------	------	------	ENOG410YARK	S:Function unknown	NP_568793.1	CCT motif family protein [Arabidopsis thaliana]	------	------	PF06203.15	CCT	CCT motif
AT4G23280	CRK20	Putative cysteine-rich receptor-like protein kinase 20 [Source:UniProtKB/Swiss-Prot;Acc:O65479]	4.121	2.04285	2.369e-07	2.08988e-06	yes	up	0.44	0.47	0.59	1.84	3.68	2.41	0.5	2.64333	GO:0006468;GO:0009751;GO:0016310;GO:0042742;GO:0016020;GO:0016021;GO:0005886;GO:0004672;GO:0106311;GO:0000166;GO:0004674;GO:0016740;GO:0016301;GO:0005524;GO:010631	BP:protein phosphorylation;BP:response to salicylic acid;BP:phosphorylation;BP:defense response to bacterium;CC:membrane;CC:integral component of membrane;CC:plasma membrane;MF:protein kinase activity;MF:old GO;MF:nucleotide binding;MF:protein serine/threonine kinase activity;MF:transferase activity;MF:kinase activity;MF:ATP binding;MF:old GO;	------	------	------	------	COG0515	T:Signal transduction mechanisms	NP_001320044.1	cysteine-rich RLK (RECEPTOR-like protein kinase) 20 [Arabidopsis thaliana]	sp|O65479|CRK20_ARATH;	Putative cysteine-rich receptor-like protein kinase 20 OS=Arabidopsis thaliana OX=3702 GN=CRK20 PE=2 SV=2;	PF07714.18;PF00069.26;PF01657.18;PF08693.11;PF01636.24	PK_Tyr_Ser-Thr;Pkinase;Stress-antifung;SKG6;APH	Protein tyrosine and serine/threonine kinase;Protein kinase domain;Salt stress response/antifungal;Transmembrane alpha-helix domain;Phosphotransferase enzyme family
AT5G18080	SAUR24	Auxin-responsive protein SAUR24 [Source:UniProtKB/Swiss-Prot;Acc:Q9FK62]	4.102	2.03627	0.00122827	0.0048412	yes	up	1.26	0.24	1.15	5.02	4.69	3.29	0.883333	4.33333	GO:0009733;GO:0009734;GO:0040008;GO:0007275;GO:0016020;GO:0005886;GO:000367	BP:response to auxin;BP:auxin-activated signaling pathway;BP:regulation of growth;BP:multicellular organism development;CC:membrane;CC:plasma membrane;MF:molecular_function;	K14488	SAUR	map04075	Plant hormone signal transduction	ENOG4111DHX	S:Function unknown	XP_010492793.1	PREDICTED: auxin-responsive protein SAUR21-like [Camelina sativa]	sp|Q9FK62|SAU24_ARATH;	Auxin-responsive protein SAUR24 OS=Arabidopsis thaliana OX=3702 GN=SAUR24 PE=2 SV=1;	PF02519.15	Auxin_inducible	Auxin responsive protein
AT5G56490	GULLO4	Probable L-gulonolactone oxidase 4 [Source:UniProtKB/Swiss-Prot;Acc:Q9FM82]	4.101	2.03599	7.65345e-06	5.08832e-05	yes	up	0.38	0.31	0.31	1.26	1.77	1.85	0.333333	1.62667	GO:0019853;GO:0055114;GO:0016020;GO:0050660;GO:0003885;GO:0071949;GO:0016491;GO:005010	BP:L-ascorbic acid biosynthetic process;BP:oxidation-reduction process;CC:membrane;MF:flavin adenine dinucleotide binding;MF:D-arabinono-1,4-lactone oxidase activity;MF:FAD binding;MF:oxidoreductase activity;MF:L-gulonolactone oxidase activity;	K00103	GULO	map00053	Ascorbate and aldarate metabolism	COG0277	C:Energy production and conversion	NP_200460.1	D-arabinono-1,4-lactone oxidase family protein [Arabidopsis thaliana]	sp|Q9FM82|GGLO4_ARATH;	Probable L-gulonolactone oxidase 4 OS=Arabidopsis thaliana OX=3702 GN=GULLO4 PE=2 SV=1;	PF01565.24;PF04030.15	FAD_binding_4;ALO	FAD binding domain;D-arabinono-1,4-lactone oxidase
AT4G27280	KRP1	Calcium-binding protein KRP1 [Source:UniProtKB/Swiss-Prot;Acc:O81831]	4.089	2.03164	3.39798e-05	0.000195899	yes	up	21.39	27.04	52.99	182.49	115.81	211.19	33.8067	169.83	GO:0009733;GO:0080167;GO:0071456;GO:0005515;GO:0005509;GO:004687	BP:response to auxin;BP:response to karrikin;BP:cellular response to hypoxia;MF:protein binding;MF:calcium ion binding;MF:metal ion binding;	K10840;K16465	CETN2;CETN1	map03420	Nucleotide excision repair	COG5126;COG5126;COG5126;COG0655;COG0655;COG0655	D:Cell cycle control, cell division, chromosome partitioning;T:Signal transduction mechanisms;Z:Cytoskeleton;D:Cell cycle control, cell division, chromosome partitioning;T:Signal transduction mechanisms;Z:Cytoskeleton	NP_194458.1	Calcium-binding EF-hand family protein [Arabidopsis thaliana]	sp|O81831|CARP1_ARATH;	Calcium-binding protein KRP1 OS=Arabidopsis thaliana OX=3702 GN=KRP1 PE=2 SV=1;	PF13833.7	EF-hand_8	EF-hand domain pair
AT3G23000	CIPK7	CBL-interacting serine/threonine-protein kinase 7 [Source:UniProtKB/Swiss-Prot;Acc:Q9XIW0]	4.078	2.028	1.62697e-21	7.64749e-20	yes	up	8.87	6.22	4.56	38.97	32.7	26.57	6.55	32.7467	GO:0006468;GO:0016310;GO:0007165;GO:0009409;GO:0035556;GO:0005737;GO:0005634;GO:0016301;GO:0106311;GO:0000166;GO:0004674;GO:0016740;GO:0005515;GO:0004672;GO:0005524;GO:010631	BP:protein phosphorylation;BP:phosphorylation;BP:signal transduction;BP:response to cold;BP:intracellular signal transduction;CC:cytoplasm;CC:nucleus;MF:kinase activity;MF:old GO;MF:nucleotide binding;MF:protein serine/threonine kinase activity;MF:transferase activity;MF:protein binding;MF:protein kinase activity;MF:ATP binding;MF:old GO;	K12761	SNF1	------	------	COG0515	S:Function unknown	NP_188940.1	CBL-interacting protein kinase 7 [Arabidopsis thaliana]	sp|Q9XIW0|CIPK7_ARATH;	CBL-interacting serine/threonine-protein kinase 7 OS=Arabidopsis thaliana OX=3702 GN=CIPK7 PE=1 SV=1;	PF00069.26;PF07714.18;PF03822.15;PF14531.7;PF06293.15	Pkinase;PK_Tyr_Ser-Thr;NAF;Kinase-like;Kdo	Protein kinase domain;Protein tyrosine and serine/threonine kinase;NAF domain;Kinase-like;Lipopolysaccharide kinase
AT1G53700	WAG1	Serine/threonine-protein kinase WAG1 [Source:UniProtKB/Swiss-Prot;Acc:Q9C8M5]	4.074	2.0265	0.000386717	0.00172668	yes	up	0.53	0.2	0.27	2.64	0.89	1.39	0.333333	1.64	GO:0006468;GO:0048825;GO:0009734;GO:0016310;GO:0009926;GO:0106311;GO:0007275;GO:0040008;GO:0005737;GO:0005634;GO:0005886;GO:0005829;GO:0016301;GO:0000166;GO:0004674;GO:0016740;GO:0004672;GO:0005524;GO:010631	BP:protein phosphorylation;BP:cotyledon development;BP:auxin-activated signaling pathway;BP:phosphorylation;BP:auxin polar transport;BP:old GO;BP:multicellular organism development;BP:regulation of growth;CC:cytoplasm;CC:nucleus;CC:plasma membrane;CC:cytosol;MF:kinase activity;MF:nucleotide binding;MF:protein serine/threonine kinase activity;MF:transferase activity;MF:protein kinase activity;MF:A…	------	------	------	------	ENOG410XQ0C	K:Transcription	NP_175774.1	WAG 1 [Arabidopsis thaliana]	sp|Q9C8M5|WAG1_ARATH;	Serine/threonine-protein kinase WAG1 OS=Arabidopsis thaliana OX=3702 GN=WAG1 PE=2 SV=1;	PF00069.26;PF07714.18	Pkinase;PK_Tyr_Ser-Thr	Protein kinase domain;Protein tyrosine and serine/threonine kinase
AT5G67310	CYP81G1	At5g67310 [Source:UniProtKB/TrEMBL;Acc:Q8GZ20]	4.071	2.02541	0.00064962	0.00274694	yes	up	0.47	0.12	0.25	0.89	1.96	1.3	0.28	1.38333	GO:0055114;GO:0016020;GO:0016021;GO:0004497;GO:0020037;GO:0016709;GO:0016705;GO:0005506;GO:0046872;GO:001649	BP:oxidation-reduction process;CC:membrane;CC:integral component of membrane;MF:monooxygenase activity;MF:heme binding;MF:oxidoreductase activity, acting on paired donors, with incorporation or reduction of molecular oxygen, NA;MF:oxidoreductase activity, acting on paired donors, with incorporation or reduction of molecular oxygen;MF:iron ion binding;MF:metal ion binding;MF:oxidoreductase activit…	K07408	CYP1A1	map00380	Tryptophan metabolism	COG2124;COG5217	Q:Secondary metabolites biosynthesis, transport and catabolism;Z:Cytoskeleton	NP_201532.2	cytochrome P450, family 81, subfamily G, polypeptide 1 [Arabidopsis thaliana]	sp|Q9FG65|C81D1_ARATH;	Cytochrome P450 81D1 OS=Arabidopsis thaliana OX=3702 GN=CYP81D1 PE=2 SV=1;	PF00067.23	p450	Cytochrome P450
AT4G12030	BASS5	Probable sodium/metabolite cotransporter BASS5, chloroplastic [Source:UniProtKB/Swiss-Prot;Acc:F4JPW1]	4.068	2.0243	3.63052e-26	2.58236e-24	yes	up	5.09	3.7	3.69	17.95	24.09	23.13	4.16	21.7233	GO:0015718;GO:0009753;GO:0009611;GO:0033506;GO:0019761;GO:0009941;GO:0009536;GO:0016021;GO:0016020;GO:0009507;GO:000802	BP:monocarboxylic acid transport;BP:response to jasmonic acid;BP:response to wounding;BP:glucosinolate biosynthetic process from homomethionine;BP:glucosinolate biosynthetic process;CC:chloroplast envelope;CC:plastid;CC:integral component of membrane;CC:membrane;CC:chloroplast;MF:monocarboxylic acid transmembrane transporter activity;	------	------	------	------	COG0385	S:Function unknown	NP_974538.1	bile acid transporter 5 [Arabidopsis thaliana]	sp|F4JPW1|BASS5_ARATH;	Probable sodium/metabolite cotransporter BASS5, chloroplastic OS=Arabidopsis thaliana OX=3702 GN=BASS5 PE=2 SV=1;	PF01758.17;PF13593.7	SBF;SBF_like	Sodium Bile acid symporter family;SBF-like CPA transporter family
AT3G59550	SYN3	Sister chromatid cohesion 1 protein 3 [Source:UniProtKB/Swiss-Prot;Acc:Q9FQ19]	4.064	2.02298	2.06098e-07	1.82941e-06	yes	up	0.27	0.36	0.48	2.28	1.63	1.65	0.37	1.85333	GO:0007064;GO:0051301;GO:0007062;GO:0006302;GO:0009555;GO:0007049;GO:0000278;GO:0051177;GO:0007059;GO:0007130;GO:0009561;GO:1990414;GO:0000795;GO:0000780;GO:0008278;GO:0005730;GO:0005634;GO:0000790;GO:0034991;GO:0034990;GO:0000798;GO:0005515;GO:000368	BP:mitotic sister chromatid cohesion;BP:cell division;BP:sister chromatid cohesion;BP:double-strand break repair;BP:pollen development;BP:cell cycle;BP:mitotic cell cycle;BP:meiotic sister chromatid cohesion;BP:chromosome segregation;BP:synaptonemal complex assembly;BP:megagametogenesis;BP:replication-born double-strand break repair via sister chromatid exchange;CC:synaptonemal complex;CC:condens…	K06670	SCC1, MCD1, RAD21	------	------	ENOG410XRB4	S:Function unknown	NP_191514.1	Rad21/Rec8-like family protein [Arabidopsis thaliana]	sp|Q9FQ19|SCC13_ARATH;	Sister chromatid cohesion 1 protein 3 OS=Arabidopsis thaliana OX=3702 GN=SYN3 PE=2 SV=2;	PF04825.14;PF04824.17	Rad21_Rec8_N;Rad21_Rec8	N terminus of Rad21 / Rec8 like protein;Conserved region of Rad21 / Rec8 like protein
AT1G57630		Disease resistance protein RPP1-WsB, putative [Source:UniProtKB/TrEMBL;Acc:Q9FVT9]	4.063	2.02271	0.000439546	0.0019368	yes	up	1.32	1.57	0.69	3.68	10.89	3.52	1.19333	6.03	GO:0006952;GO:0007165;GO:0071456;GO:0016787;GO:0043531;GO:0061809;GO:0000166;GO:0050135;GO:0005515;GO:0003953;GO:000552	BP:defense response;BP:signal transduction;BP:cellular response to hypoxia;MF:hydrolase activity;MF:ADP binding;MF:NAD+ nucleotidase, cyclic ADP-ribose generating;MF:nucleotide binding;MF:NA;MF:protein binding;MF:NAD+ nucleosidase activity;MF:ATP binding;	------	------	------	------	ENOG410ZSQ7;ENOG410XYF5	S:Function unknown;	NP_176076.1	Toll-Interleukin-Resistance (TIR) domain family protein [Arabidopsis thaliana]	sp|F4J339|RPP1_ARATH;	Probable disease resistance protein RPP1 OS=Arabidopsis thaliana OX=3702 GN=RPP1 PE=1 SV=1;	PF01582.21;PF13676.7	TIR;TIR_2	TIR domain;TIR domain
AT3G55980	SZF1	Salt-inducible zinc finger 1 [Source:UniProtKB/TrEMBL;Acc:A0A1I9LNJ4]	4.052	2.01878	7.05996e-05	0.000379418	yes	up	21.21	27.01	57.97	194.2	213.43	133.25	35.3967	180.293	GO:0010200;GO:0006355;GO:0071456;GO:0005634;GO:0003700;GO:0003677;GO:0005515;GO:004687	BP:response to chitin;BP:regulation of transcription, DNA-templated;BP:cellular response to hypoxia;CC:nucleus;MF:transcription factor activity, sequence-specific DNA binding;MF:DNA binding;MF:protein binding;MF:metal ion binding;	------	------	------	------	ENOG410XR0Z	S:Function unknown	NP_001326199.1	salt-inducible zinc finger 1 [Arabidopsis thaliana]	sp|Q93ZS9|C3H47_ARATH;	Zinc finger CCCH domain-containing protein 47 OS=Arabidopsis thaliana OX=3702 GN=At3g55980 PE=2 SV=1;	PF13637.7;PF12796.8;PF00642.25;PF18044.2;PF18345.2	Ank_4;Ank_2;zf-CCCH;zf-CCCH_4;zf_CCCH_4	Ankyrin repeats;Ankyrin repeats;Zinc finger C-x8-C-x5-C-x3-H type;CCCH-type zinc finger;Zinc finger domain
AT5G64900	PEP1	Elicitor peptide 1 [Source:UniProtKB/Swiss-Prot;Acc:Q9LV87]	4.037	2.01323	0.0012378	0.00487169	yes	up	0.65	1.04	0.65	3.27	6.05	2.21	0.78	3.84333	GO:0009753;GO:0045087;GO:0009611;GO:0009723;GO:0006952;GO:0009814;GO:000551	BP:response to jasmonic acid;BP:innate immune response;BP:response to wounding;BP:response to ethylene;BP:defense response;BP:defense response, incompatible interaction;MF:protein binding;	------	------	------	------	ENOG41105WJ	O:Posttranslational modification, protein turnover, chaperones	NP_569001.1	precursor of peptide 1 [Arabidopsis thaliana]	sp|Q9LV87|PEP1_ARATH;	Elicitor peptide 1 OS=Arabidopsis thaliana OX=3702 GN=PEP1 PE=1 SV=1;	PF17232.3	Pep1_7	Elicitor peptide 1-7
AT4G24570	PUMP4	DIC2 [Source:UniProtKB/TrEMBL;Acc:A0A178URN9]	4.033	2.01179	0.000185109	0.000898604	yes	up	10.31	14.99	29.59	96.1	118.56	58.63	18.2967	91.0967	GO:0015729;GO:1902358;GO:0015709;GO:1902356;GO:0008272;GO:0071456;GO:0035435;GO:0006839;GO:0055085;GO:0071422;GO:0071423;GO:0005743;GO:0016021;GO:0016020;GO:0005739;GO:0005347;GO:0015141;GO:0015140;GO:0015297;GO:0005310;GO:0015131;GO:0015116;GO:001511	BP:oxaloacetate transport;BP:sulfate transmembrane transport;BP:thiosulfate transport;BP:oxaloacetat;BP:sulfate transport;BP:cellular response to hypoxia;BP:phosphate ion transmembrane transport;BP:mitochondrial transport;BP:transmembrane transport;BP:succinate transmembrane transport;BP:malate transmembrane transport;CC:mitochondrial inner membrane;CC:integral component of membrane;CC:membrane;C…	K13577;K15104	SLC25A10, DIC;SLC25A11, OGC	------	------	ENOG410XQHU	U:Intracellular trafficking, secretion, and vesicular transport	NP_194188.1	dicarboxylate carrier 2 [Arabidopsis thaliana]	sp|Q9SB52|PUMP4_ARATH;	Mitochondrial uncoupling protein 4 OS=Arabidopsis thaliana OX=3702 GN=PUMP4 PE=2 SV=1;	PF00153.28	Mito_carr	Mitochondrial carrier protein
AT3G44550	FAR5	Probable fatty acyl-CoA reductase 5 [Source:UniProtKB/Swiss-Prot;Acc:Q0WRB0]	4.014	2.0052	0.0160535	0.0445653	yes	up	0.05	0.15	0.04	0.5	0.46	0.41	0.08	0.456667	GO:0006629;GO:0009611;GO:0009651;GO:0035336;GO:0010345;GO:0043231;GO:0080019;GO:0102965;GO:0050062;GO:001649	BP:lipid metabolic process;BP:response to wounding;BP:response to salt stress;BP:long-chain fatty-acyl-CoA metabolic process;BP:suberin biosynthetic process;CC:intracellular membrane-bounded organelle;MF:fatty-acyl-CoA reductas;MF:alcohol-forming fatty acyl-CoA reductase activity;MF:long-chain-fatty-acyl-CoA reductase activity;MF:oxidoreductase activity;	K13356	FAR	map04146;map00073	Peroxisome;Cutin, suberine and wax biosynthesis	ENOG410XS7R	S:Function unknown	NP_190041.2	fatty acid reductase 5 [Arabidopsis thaliana]	sp|Q0WRB0|FACR5_ARATH;	Probable fatty acyl-CoA reductase 5 OS=Arabidopsis thaliana OX=3702 GN=FAR5 PE=1 SV=1;	PF07993.13;PF03015.20;PF01370.22;PF01073.20;PF02719.16;PF04321.18	NAD_binding_4;Sterile;Epimerase;3Beta_HSD;Polysacc_synt_2;RmlD_sub_bind	Male sterility protein;Male sterility protein;NAD dependent epimerase/dehydratase family;3-beta hydroxysteroid dehydrogenase/isomerase family;Polysaccharide biosynthesis protein;RmlD substrate binding domain
AT5G07460	MRSA2	PMSR2 [Source:UniProtKB/TrEMBL;Acc:A0A178UBC0]	4.014	2.00517	3.11307e-23	1.77379e-21	yes	up	7.52	7.79	4.79	29.6	39.28	30.11	6.7	32.9967	GO:0006464;GO:0080167;GO:0034599;GO:0006979;GO:0055114;GO:0005737;GO:0005829;GO:0005886;GO:0008113;GO:0033744;GO:0036456;GO:001649	BP:cellular protein modification process;BP:response to karrikin;BP:cellular response to oxidative stress;BP:response to oxidative stress;BP:oxidation-reduction process;CC:cytoplasm;CC:cytosol;CC:plasma membrane;MF:peptide-methionin;MF:L-methionin;MF:L-methionine;MF:oxidoreductase activity;	K07304	msrA	------	------	COG0225	E:Amino acid transport and metabolism	NP_196363.1	peptidemethionine sulfoxide reductase 2 [Arabidopsis thaliana]	sp|Q9LY15|MSRA2_ARATH;	Peptide methionine sulfoxide reductase A2 OS=Arabidopsis thaliana OX=3702 GN=MRSA2 PE=1 SV=1;	PF01625.22	PMSR	Peptide methionine sulfoxide reductase
AT2G22330	CYP79B3	cytochrome P450, family 79, subfamily B, polypeptide 3 [Source:TAIR;Acc:AT2G22330]	4.012	2.00422	1.73073e-38	2.47852e-36	yes	up	8.96	10.05	8.8	37.21	53.76	45.35	9.27	45.44	GO:0010120;GO:0042742;GO:0009617;GO:0009611;GO:0006569;GO:0002229;GO:0052544;GO:0019761;GO:0009682;GO:0009684;GO:0006952;GO:0055114;GO:0010112;GO:0009625;GO:0016020;GO:0016021;GO:0004497;GO:0016491;GO:0016709;GO:0005506;GO:0046872;GO:0020037;GO:001670	BP:camalexin biosynthetic process;BP:defense response to bacterium;BP:response to bacterium;BP:response to wounding;BP:tryptophan catabolic process;BP:defense response to oomycetes;BP:defense response by callose deposition in cell wall;BP:glucosinolate biosynthetic process;BP:induced systemic resistance;BP:indoleacetic acid biosynthetic process;BP:defense response;BP:oxidation-reduction process;B…	K11813	CYP79B3	map00380;map00966	Tryptophan metabolism;Glucosinolate biosynthesis	COG2124	S:Function unknown	NP_001323954.1	cytochrome P450, family 79, subfamily B, polypeptide 3 [Arabidopsis thaliana]	sp|Q501D8|C79B3_ARATH;	Tryptophan N-monooxygenase 2 OS=Arabidopsis thaliana OX=3702 GN=CYP79B3 PE=1 SV=1;	PF00067.23	p450	Cytochrome P450
AT2G04050	DTX3	Protein DETOXIFICATION 3 [Source:UniProtKB/Swiss-Prot;Acc:Q9SIA4]	4.009	2.00312	0.000949776	0.00385091	yes	up	1.44	0.11	0.53	4.28	4.05	1.72	0.693333	3.35	GO:0055085;GO:0042908;GO:0016021;GO:0016020;GO:0015297;GO:0022857;GO:004291	BP:transmembrane transport;BP:xenobiotic transport;CC:integral component of membrane;CC:membrane;MF:antiporter activity;MF:transmembrane transporter activity;MF:xenobiotic transporter activity;	K03327	TC.MATE, SLC47A, norM, mdtK, dinF	------	------	COG0534	V:Defense mechanisms	NP_178492.1	MATE efflux family protein [Arabidopsis thaliana]	sp|Q9SIA4|DTX3_ARATH;	Protein DETOXIFICATION 3 OS=Arabidopsis thaliana OX=3702 GN=DTX3 PE=3 SV=1;	PF01554.19	MatE	MatE
AT4G01270		Putative RING zinc finger protein [Source:UniProtKB/TrEMBL;Acc:Q9M143]	4.008	2.00297	0.000912438	0.00371777	yes	up	0.42	0.28	0.1	1.82	1.05	1.03	0.266667	1.3	------	------	K11985	TRAIP, TRIP	------	------	ENOG410YY6J	S:Function unknown	NP_192036.1	RING/U-box superfamily protein [Arabidopsis thaliana]	------	------	PF13639.7;PF12678.8;PF00097.26;PF12861.8;PF13923.7;PF13445.7;PF14634.7;PF17123.6	zf-RING_2;zf-rbx1;zf-C3HC4;zf-ANAPC11;zf-C3HC4_2;zf-RING_UBOX;zf-RING_5;zf-RING_11	Ring finger domain;RING-H2 zinc finger domain;Zinc finger, C3HC4 type;Anaphase-promoting complex subunit 11 RING-H2 finger;Zinc finger, C3HC4 type;RING-type zinc-finger;zinc-RING finger domain;RING-like zinc finger
AT4G31800	WRKY18	WRKY like transcription factor [Source:UniProtKB/TrEMBL;Acc:Q0WTZ3]	4.006	2.00213	1.0866e-24	6.92619e-23	yes	up	19.68	23.67	19.73	76.78	95.71	139.46	21.0267	103.983	GO:0009751;GO:0010200;GO:0050832;GO:0006355;GO:0002237;GO:0042742;GO:0031347;GO:0005634;GO:0043565;GO:0003700;GO:0042802;GO:0005515;GO:000367	BP:response to salicylic acid;BP:response to chitin;BP:defense response to fungus;BP:regulation of transcription, DNA-templated;BP:response to molecule of bacterial origin;BP:defense response to bacterium;BP:regulation of defense response;CC:nucleus;MF:sequence-specific DNA binding;MF:transcription factor activity, sequence-specific DNA binding;MF:identical protein binding;MF:protein binding;MF:D…	------	------	------	------	ENOG410YHES;ENOG410ZQZN	J:Translation, ribosomal structure and biogenesis;S:Function unknown	NP_567882.1	WRKY DNA-binding protein 18 [Arabidopsis thaliana]	sp|Q9C5T4|WRK18_ARATH;	WRKY transcription factor 18 OS=Arabidopsis thaliana OX=3702 GN=WRKY18 PE=1 SV=2;	PF03106.16	WRKY	WRKY DNA -binding domain
AT1G55210	DIR20	Dirigent protein 20 [Source:UniProtKB/Swiss-Prot;Acc:Q9C891]	4.004	2.00161	1.73855e-12	3.15154e-11	yes	up	4.83	2.54	2.89	18.3	17.06	18.12	3.42	17.8267	GO:0048046;GO:000557	CC:apoplast;CC:extracellular region;	------	------	------	------	ENOG410ZQVA	S:Function unknown	NP_001185232.1	Disease resistance-responsive (dirigent-like protein) family protein [Arabidopsis thaliana]	sp|Q9C891|DIR20_ARATH;	Dirigent protein 20 OS=Arabidopsis thaliana OX=3702 GN=DIR20 PE=2 SV=1;	PF03018.15	Dirigent	Dirigent-like protein
AT1G27030		At1g27030/T7N9_9 [Source:UniProtKB/TrEMBL;Acc:Q9LFY3]	3.997	1.99903	4.08667e-17	1.26493e-15	yes	up	3.2	3.35	2.39	14.97	10.86	18.16	2.98	14.6633	GO:0008150;GO:000557	BP:biological_process;CC:cellular_component;	------	------	------	------	ENOG410Z3E0;ENOG4110777	S:Function unknown;	NP_564270.1	hypothetical protein AT1G27030 [Arabidopsis thaliana]	------	------	PF07063.14	DUF1338	Domain of unknown function
AT3G52630	RPA3A	Replication protein A 14 kDa subunit A [Source:UniProtKB/Swiss-Prot;Acc:Q9LXK1]	3.996	1.99848	7.04608e-05	0.000378866	yes	up	1.64	1.29	1.88	10.96	6.86	4.53	1.60333	7.45	GO:0006310;GO:0006281;GO:0006974;GO:0006260;GO:0005634;GO:000367	BP:DNA recombination;BP:DNA repair;BP:cellular response to DNA damage stimulus;BP:DNA replication;CC:nucleus;MF:DNA binding;	K10740	RPA3	map03430;map03440;map03420;map03030	Mismatch repair;Homologous recombination;Nucleotide excision repair;DNA replication	ENOG410YSBX	L:Replication, recombination and repair	NP_001078273.1	Nucleic acid-binding, OB-fold-like protein [Arabidopsis thaliana]	sp|Q9LXK1|RFA3A_ARATH;	Replication protein A 14 kDa subunit A OS=Arabidopsis thaliana OX=3702 GN=RPA3A PE=3 SV=1;	PF08661.12	Rep_fac-A_3	Replication factor A protein 3
AT5G48410	GLR1.3	Glutamate receptor 1.3 [Source:UniProtKB/Swiss-Prot;Acc:Q9FH75]	3.992	1.99696	0.000484995	0.00211537	yes	up	0.19	0.44	0.44	1.06	3.49	0.79	0.356667	1.78	GO:0071230;GO:0070588;GO:0006811;GO:0019722;GO:0006816;GO:0034220;GO:0016020;GO:0005886;GO:0016021;GO:0038023;GO:0005262;GO:0015276;GO:000806	BP:cellular response to amino acid stimulus;BP:calcium ion transmembrane transport;BP:ion transport;BP:calcium-mediated signaling;BP:calcium ion transport;BP:ion transmembrane transport;CC:membrane;CC:plasma membrane;CC:integral component of membrane;MF:signaling receptor activity;MF:calcium channel activity;MF:ligand-gated ion channel activity;MF:glutamate receptor activity;	K05387	GRIP	------	------	ENOG410XPSH;ENOG410XQQV	U:Intracellular trafficking, secretion, and vesicular transport;S:Function unknown	NP_199652.1	glutamate receptor 1.3 [Arabidopsis thaliana]	sp|Q9FH75|GLR13_ARATH;	Glutamate receptor 1.3 OS=Arabidopsis thaliana OX=3702 GN=GLR1.3 PE=2 SV=1;	PF01094.29;PF00060.27;PF00497.21;PF13458.7;PF10613.10	ANF_receptor;Lig_chan;SBP_bac_3;Peripla_BP_6;Lig_chan-Glu_bd	Receptor family ligand binding region;Ligand-gated ion channel;Bacterial extracellular solute-binding proteins, family 3;Periplasmic binding protein;Ligated ion channel L-glutamate- and glycine-binding site
AT2G46440	CNGC11	Cyclic nucleotide-gated ion channel 11 [Source:UniProtKB/Swiss-Prot;Acc:Q9SKD6]	3.989	1.9959	1.22405e-14	2.85182e-13	yes	up	1.96	3.02	1.26	9.37	10.64	10.57	2.08	10.1933	GO:0055085;GO:0009620;GO:0006811;GO:0009617;GO:0006952;GO:0034220;GO:0016020;GO:0016021;GO:0005886;GO:0030553;GO:0030552;GO:0000166;GO:0005516;GO:0005261;GO:000521	BP:transmembrane transport;BP:response to fungus;BP:ion transport;BP:response to bacterium;BP:defense response;BP:ion transmembrane transport;CC:membrane;CC:integral component of membrane;CC:plasma membrane;MF:cGMP binding;MF:cAMP binding;MF:nucleotide binding;MF:calmodulin binding;MF:cation channel activity;MF:ion channel activity;	K05391	CNGC	map04626	Plant-pathogen interaction	ENOG410XPSE	U:Intracellular trafficking, secretion, and vesicular transport	VYS55712.1	unnamed protein product [Arabidopsis thaliana]	sp|Q9SKD6|CNG11_ARATH;	Cyclic nucleotide-gated ion channel 11 OS=Arabidopsis thaliana OX=3702 GN=CNGC11 PE=2 SV=2;	PF00520.32;PF00027.30	Ion_trans;cNMP_binding	Ion transport protein;Cyclic nucleotide-binding domain
AT5G05250		AT5g05250/K18I23_5 [Source:UniProtKB/TrEMBL;Acc:Q9FLC9]	3.983	1.99375	2.41193e-07	2.12601e-06	yes	up	3.83	1.05	1.12	10.21	8.96	9.72	2	9.63	GO:000815	BP:biological_process;	------	------	------	------	ENOG410YTJH	S:Function unknown	NP_568152.1	hypothetical protein AT5G05250 [Arabidopsis thaliana]	------	------	------	------	------
AT3G54810	GATA8	GATA transcription factor [Source:UniProtKB/TrEMBL;Acc:B9DHF1]	3.982	1.99338	1.54392e-22	8.20916e-21	yes	up	9.36	6.96	8.91	31.24	36.08	56.23	8.41	41.1833	GO:0007623;GO:0030154;GO:0006355;GO:0009845;GO:0045893;GO:0005634;GO:0043565;GO:0044212;GO:0003700;GO:0000976;GO:0008270;GO:0005515;GO:0003677;GO:004687	BP:circadian rhythm;BP:cell differentiation;BP:regulation of transcription, DNA-templated;BP:seed germination;BP:positive regulation of transcription, DNA-templated;CC:nucleus;MF:sequence-specific DNA binding;MF:transcription regulatory region DNA binding;MF:transcription factor activity, sequence-specific DNA binding;MF:transcription regulatory region sequence-specific DNA binding;MF:zinc ion bi…	------	------	------	------	COG5641	S:Function unknown	CAA0386429.1	unnamed protein product [Arabidopsis thaliana]	sp|Q9SV30|GATA8_ARATH;	GATA transcription factor 8 OS=Arabidopsis thaliana OX=3702 GN=GATA8 PE=2 SV=1;	PF00320.28	GATA	GATA zinc finger
AT4G11521	CRK34	Putative cysteine-rich receptor-like protein kinase 34 [Source:UniProtKB/Swiss-Prot;Acc:Q8LPI0]	3.962	1.98628	6.58808e-20	2.62558e-18	yes	up	2.22	2.36	2.74	12.13	12.12	11.3	2.44	11.85	GO:0016021;GO:0005576;GO:0005524;GO:000467	CC:integral component of membrane;CC:extracellular region;MF:ATP binding;MF:protein kinase activity;	------	------	------	------	COG0515	T:Signal transduction mechanisms	NP_001154221.1	Receptor-like protein kinase-related family protein [Arabidopsis thaliana]	sp|Q8LPI0|CRK34_ARATH;	Putative cysteine-rich receptor-like protein kinase 34 OS=Arabidopsis thaliana OX=3702 GN=CRK34 PE=5 SV=1;	PF01657.18	Stress-antifung	Salt stress response/antifungal
AT5G01420		Glutaredoxin family protein [Source:UniProtKB/TrEMBL;Acc:Q9M031]	3.959	1.98526	0.0122082	0.0354096	yes	up	0.11	0.11	0.19	0.51	0.86	0.66	0.136667	0.676667	GO:0016192;GO:0045454;GO:0016021;GO:0005623;GO:0015035;GO:000905	BP:vesicle-mediated transport;BP:cell redox homeostasis;CC:integral component of membrane;CC:cell;MF:protein disulfide oxidoreductase activity;MF:electron carrier activity;	------	------	------	------	ENOG4111HAI	H:Coenzyme transport and metabolism	NP_195762.1	Glutaredoxin family protein [Arabidopsis thaliana]	sp|A8MXD5|GRCR1_HUMAN;	Glutaredoxin domain-containing cysteine-rich protein 1 OS=Homo sapiens OX=9606 GN=GRXCR1 PE=1 SV=1;	PF00462.25	Glutaredoxin	Glutaredoxin
AT4G13395	DVL10	DVL10 [Source:UniProtKB/TrEMBL;Acc:Q6IM91]	3.958	1.98485	4.50762e-15	1.10535e-13	yes	up	4.71	5.56	4.96	29.78	19.41	23.6	5.07667	24.2633	GO:0048367;GO:0071456;GO:000367	BP:shoot system development;BP:cellular response to hypoxia;MF:molecular_function;	------	------	------	------	ENOG410ZD85	S:Function unknown	XP_002863136.2	uncharacterized protein LOC9299212 [Arabidopsis lyrata subsp. lyrata]	------	------	PF08137.13	DVL	DVL family
AT1G74000	SSL11	Protein STRICTOSIDINE SYNTHASE-LIKE 11 [Source:UniProtKB/Swiss-Prot;Acc:P92976]	3.955	1.98358	0.0049314	0.0162597	yes	up	0.35	0.17	0.13	0.91	1.37	0.84	0.216667	1.04	GO:0009820;GO:0009058;GO:0005783;GO:0005618;GO:0005773;GO:0009505;GO:0016844;GO:001682	BP:alkaloid metabolic process;BP:biosynthetic process;CC:endoplasmic reticulum;CC:cell wall;CC:vacuole;CC:plant-type cell wall;MF:strictosidine synthase activity;MF:lyase activity;	K01757	STR1	map00901	Indole alkaloid biosynthesis	COG3386;COG3386	O:Posttranslational modification, protein turnover, chaperones;U:Intracellular trafficking, secretion, and vesicular transport	NP_177540.3	strictosidine synthase 3 [Arabidopsis thaliana]	sp|P92976|SSL11_ARATH;	Protein STRICTOSIDINE SYNTHASE-LIKE 11 OS=Arabidopsis thaliana OX=3702 GN=SSL11 PE=2 SV=2;	PF03088.17;PF08450.13	Str_synth;SGL	Strictosidine synthase;SMP-30/Gluconolactonase/LRE-like region
AT3G19030		AT3g19030/K13E13_15 [Source:UniProtKB/TrEMBL;Acc:Q9LJ63]	3.94	1.97835	6.44844e-60	2.94721e-57	yes	up	150.27	122.64	106.45	571.38	589.48	594.71	126.453	585.19	GO:0006413;GO:000374	BP:translational initiation;MF:translation initiation factor activity;	------	------	------	------	ENOG41106QQ;ENOG411064V	S:Function unknown;	EOA32281.1	hypothetical protein CARUB_v10015542mg [Capsella rubella]	------	------	------	------	------
AT5G54710		Ankyrin repeat family protein [Source:TAIR;Acc:AT5G54710]	3.934	1.97615	7.69642e-40	1.21564e-37	yes	up	15.36	11.62	14.65	53.89	75	74.25	13.8767	67.7133	GO:0006979;GO:0098869;GO:0016021;GO:0016020;GO:0020037;GO:0005515;GO:000460	BP:response to oxidative stress;BP:cellular oxidant detoxification;CC:integral component of membrane;CC:membrane;MF:heme binding;MF:protein binding;MF:peroxidase activity;	------	------	------	------	COG0666	S:Function unknown	NP_001332664.1	Ankyrin repeat family protein [Arabidopsis thaliana]	sp|Q9ZU96|Y2168_ARATH;	Ankyrin repeat-containing protein At2g01680 OS=Arabidopsis thaliana OX=3702 GN=At2g01680 PE=2 SV=1;	PF13857.7;PF12796.8;PF13637.7;PF13606.7;PF13962.7;PF00023.31	Ank_5;Ank_2;Ank_4;Ank_3;PGG;Ank	Ankyrin repeats;Ankyrin repeats;Ankyrin repeats;Ankyrin repeat;Domain of unknown function;Ankyrin repeat
AT2G43440		F-box protein At2g43440 [Source:UniProtKB/Swiss-Prot;Acc:A8MS20]	3.934	1.97612	0.0169645	0.0466182	yes	up	0.13	0.16	0.17	1.18	0.63	0.44	0.153333	0.75	GO:000551	MF:protein binding;	------	------	------	------	ENOG41106S2;ENOG41103R3;ENOG410ZR7K	S:Function unknown;	NP_181872.3	F-box and associated interaction domains-containing protein [Arabidopsis thaliana]	sp|A8MS20|FB350_ARATH;	F-box protein At2g43440 OS=Arabidopsis thaliana OX=3702 GN=At2g43440 PE=2 SV=1;	PF00646.34;PF07734.14;PF12937.8;PF08268.13	F-box;FBA_1;F-box-like;FBA_3	F-box domain;F-box associated;F-box-like;F-box associated domain
AT5G42650	CYP74A	Allene oxide synthase, chloroplastic [Source:UniProtKB/Swiss-Prot;Acc:Q96242]	3.931	1.9749	5.47251e-23	3.06133e-21	yes	up	19.34	11.13	10.75	54.44	81.41	62.71	13.74	66.1867	GO:0006633;GO:0006631;GO:0009695;GO:0009753;GO:0009611;GO:0019373;GO:0016125;GO:0006629;GO:0006952;GO:0055114;GO:0050832;GO:0031408;GO:0009620;GO:0031407;GO:0009535;GO:0009534;GO:0009536;GO:0005739;GO:0009579;GO:0009941;GO:0010287;GO:0009507;GO:0004497;GO:0016491;GO:0016829;GO:0016705;GO:0047987;GO:0005506;GO:0046872;GO:0020037;GO:0019825;GO:000997	BP:fatty acid biosynthetic process;BP:fatty acid metabolic process;BP:jasmonic acid biosynthetic process;BP:response to jasmonic acid;BP:response to wounding;BP:epoxygenase P450 pathway;BP:sterol metabolic process;BP:lipid metabolic process;BP:defense response;BP:oxidation-reduction process;BP:defense response to fungus;BP:oxylipin biosynthetic process;BP:response to fungus;BP:oxylipin metabolic …	K01723	AOS	map00592	alpha-Linolenic acid metabolism	ENOG410ZAGU	Q:Secondary metabolites biosynthesis, transport and catabolism	NP_199079.1	allene oxide synthase [Arabidopsis thaliana]	sp|Q96242|CP74A_ARATH;	Allene oxide synthase, chloroplastic OS=Arabidopsis thaliana OX=3702 GN=CYP74A PE=1 SV=3;	PF00067.23	p450	Cytochrome P450
[truncated: 1,742 more rows]

## Sheet: WT_25C_Si_vs_CK DEGs
Gene_id	Gene name	Gene description	FC(WT_Si_25C/WT_CK_25C)	Log2FC(WT_Si_25C/WT_CK_25C)	Pvalue	Padjust	Significant	Regulate	WT_CK_25C_1	WT_CK_25C_2	WT_CK_25C_3	WT_Si_25C_1	WT_Si_25C_2	WT_Si_25C_3	Mean expression level in WT_CK_25C	Mean expression level in WT_Si_25C	GO_id	GO_term	KO_id	KO_name	Pathway_id	Pathway_definition	COG_id	COG_Functional Categories	NR_hit-name	NR_description	Swiss-Prot_hit-name	Swiss-Prot_description	Pfam_id	Domain	Domain description
[truncated: 3,035 more rows]

## Sheet: WT_28C_Si_vs_CK DEGs
Gene_id	Gene name	Gene description	FC(WT_Si_28C/WT_CK_28C)	Log2FC(WT_Si_28C/WT_CK_28C)	Pvalue	Padjust	Significant	Regulate	WT_CK_28C_1	WT_CK_28C_2	WT_CK_28C_3	WT_Si_28C_1	WT_Si_28C_2	WT_Si_28C_3	Mean expression level in WT_CK_28C	Mean expression level in WT_Si_28C	GO_id	GO_term	KO_id	KO_name	Pathway_id	Pathway_definition	COG_id	COG_Functional Categories	NR_hit-name	NR_description	Swiss-Prot_hit-name	Swiss-Prot_description	Pfam_id	Domain	Domain description
[truncated: 2,497 more rows]
