# Supplementary material for: High Ambient Temperature Regulated the Plant Systemic Response to the Beneficial Endophytic Fungus Serendipita indica
Source: Front Plant Sci. 2022 Mar 16;13:844572. doi: 10.3389/fpls.2022.844572 (PMC8966885; doi:10.3389/fpls.2022.844572)
Supplement: Supplementary file 2 [file Table_2.XLSX]

## Sheet: Sheet1
Category	Type	Functional description	Up/Down Ratio	Type	wt_Si/CK_22C_up_COG	wt_Si/CK_25C_up_COG	wt_Si/CK_28C_up_COG	Up_Total DEGs		Type	wt_Si/CK_22C_down_COG	wt_Si/CK_25C_down_COG	wt_Si/CK_28C_down_COG	Down_Total DEGs
INFORMATION STORAGE AND PROCESSING	A	RNA processing and modification	1	A	5	3	4	12		A	4	4	4	12
INFORMATION STORAGE AND PROCESSING	B	Chromatin structure and dynamics	2.13333	B	7	17	8	32		B	4	8	3	15
METABOLISM	C	Energy production and conversion	1.21277	C	17	18	22	57		C	13	19	15	47
CELLULAR PROCESSES AND SIGNALING	D	Cell cycle control, cell division, chromosome partitioning	4.46154	D	18	18	22	58		D	3	8	2	13
METABOLISM	E	Amino acid transport and metabolism	1.98611	E	38	57	48	143		E	22	28	22	72
METABOLISM	F	Nucleotide transport and metabolism	2.5	F	12	13	10	35		F	3	7	4	14
METABOLISM	G	Carbohydrate transport and metabolism	1.69128	G	74	94	84	252		G	40	61	48	149
METABOLISM	H	Coenzyme transport and metabolism	2.23529	H	11	14	13	38		H	5	7	5	17
METABOLISM	I	Lipid transport and metabolism	1.93333	I	27	32	28	87		I	14	18	13	45
INFORMATION STORAGE AND PROCESSING	J	Translation, ribosomal structure and biogenesis	1.76596	J	16	43	24	83		J	11	23	13	47
INFORMATION STORAGE AND PROCESSING	K	Transcription	2.32335	K	133	141	114	388		K	42	85	40	167
INFORMATION STORAGE AND PROCESSING	L	Replication, recombination and repair	4.45833	L	27	44	36	107		L	6	11	7	24
CELLULAR PROCESSES AND SIGNALING	M	Cell wall/membrane/envelope biogenesis	2.36	M	21	24	14	59		M	8	10	7	25
CELLULAR PROCESSES AND SIGNALING	O	Posttranslational modification, protein turnover, chaperones	1.94488	O	73	101	73	247		O	30	58	39	127
METABOLISM	P	Inorganic ion transport and metabolism	3.27778	P	31	44	43	118		P	9	12	15	36
METABOLISM	Q	Secondary metabolites biosynthesis, transport and catabolism	3.57143	Q	34	34	32	100		Q	5	13	10	28
CELLULAR PROCESSES AND SIGNALING	T	Signal transduction mechanisms	3.14444	T	84	90	109	283		T	19	44	27	90
CELLULAR PROCESSES AND SIGNALING	U	Intracellular trafficking, secretion, and vesicular transport	2.57692	U	66	69	66	201		U	20	34	24	78
CELLULAR PROCESSES AND SIGNALING	V	Defense mechanisms	6.66667	V	13	12	15	40		V	2	3	1	6
CELLULAR PROCESSES AND SIGNALING	Z	Cytoskeleton	2.75	Z	19	19	17	55		Z	6	10	4	20
POORLY CHARACTERIZED	S	Function unknown	2.28199	S	882	1102	994	2978		S	349	561	395	1305
CELLULAR PROCESSES AND SIGNALING	N	Cell motility		N	0	1	1	2
Total number of DEGs			2.29996		1608	1990	1777	5375			615	1024	698	2337
