# Supplementary material for: High Ambient Temperature Regulated the Plant Systemic Response to the Beneficial Endophytic Fungus Serendipita indica
Source: Front Plant Sci. 2022 Mar 16;13:844572. doi: 10.3389/fpls.2022.844572 (PMC8966885; doi:10.3389/fpls.2022.844572)
Supplement: Supplementary file 3 [file Table_3.XLSX]

## Sheet: PIF4 target vs WT_DEGs_28C
	Specific(1) WT_28C_Si/CK upregulated DEGs	Specific(2) WT_28C_Si/CK downregulated DEGs	Specific(3) PIF4 target	Shared (1) by WT_28C_upregulated DEGs and PIF4 target	Shared (2) by WT_28C_downregulated DEGs and PIF4 target
Gene Number Count	1479	527	3872	295	196
Gene ID	AT1G02920	AT3G47340	AT1G01060	AT5G23020	AT5G49360
	AT1G02930	AT3G13450	AT1G01070	AT5G45380	AT1G03090
	AT2G38860	AT1G08630	AT1G01100	AT2G43140	AT5G07440
	AT3G16530	AT1G66760	AT1G01110	AT1G66390	AT1G06570
	AT1G21110	AT2G39570	AT1G01140	AT2G39210	AT1G10070
	AT1G64400	AT4G36850	AT1G01150	AT5G16570	AT5G57655
	AT1G26380	AT4G34030	AT1G01250	AT5G11670	AT2G38400
	AT4G39950	AT2G18050	AT1G01260	AT2G36880	AT3G45300
	AT3G23000	AT2G30600	AT1G01320	AT4G16370	AT3G61260
	AT1G45201	AT1G62510	AT1G01370	AT1G18570	AT2G28190
	AT5G37600	AT1G79700	AT1G01380	AT4G36220	AT1G21400
	AT2G43150	AT2G19800	AT1G01390	AT2G18690	AT3G13750
	AT5G19240	AT1G55810	AT1G01400	AT4G33050	AT2G22980
	AT3G15356	AT1G11260	AT1G01430	AT1G64710	AT2G46220
	AT2G46430	AT5G02810	AT1G01440	AT1G02360	AT4G38470
	AT1G21120	AT5G02160	AT1G01471	AT3G24503	AT1G72150
	AT4G39940	AT5G24490	AT1G01490	AT1G78850	AT4G25580
	AT1G27020	AT5G57560	AT1G01500	AT2G25470	AT3G30775
	AT4G08770	AT5G56870	AT1G01540	AT1G25220	AT1G76490
	AT4G30530	AT1G35140	AT1G01570	AT1G73600	AT5G20250
	AT1G78370	AT2G43400	AT1G01580	AT3G23810	AT3G26520
	AT3G28940	AT5G21170	AT1G01630	AT5G25250	AT5G44020
	AT1G12940	AT3G54890	AT1G01650	AT4G37800	AT1G54100
	AT5G57220	AT5G66400	AT1G01660	AT2G47010	AT3G45970
	AT1G04040	AT5G65730	AT1G01710	AT4G39800	AT2G32150
	AT2G30870	AT1G12780	AT1G01720	AT2G42610	AT5G66052
	AT3G03780	AT4G16680	AT1G01840	AT1G55210	AT1G72180
	AT2G43590	AT2G33830	AT1G01940	AT1G12110	AT2G18280
	AT5G61160	AT4G37870	AT1G01950	AT5G05250	AT1G12240
	AT4G31500	AT4G37300	AT1G02060	AT4G30170	AT1G12440
	AT1G26420	AT3G57520	AT1G02065	AT2G43000	AT2G18700
	AT4G04610	AT5G49440	AT1G02210	AT3G02840	AT3G45730
	AT3G12500	AT2G05540	AT1G02250	AT4G27300	AT2G24270
	AT1G09310	AT2G34590	AT1G02340	AT5G48540	AT4G13540
	AT4G21960	AT3G51840	AT1G02350	AT3G14210	AT3G19390
	AT3G54640	AT2G15960	AT1G02391	AT5G03760	AT4G35100
	AT3G20470	AT4G25810	AT1G02630	AT3G17390	AT5G64260
	AT4G14365	AT5G63190	AT1G02670	AT4G34135	AT1G64660
	AT5G07460	AT4G19160	AT1G02813	AT1G64390	AT3G54500
	AT2G47800	AT1G07040	AT1G02816	AT5G54710	AT1G60140
	AT1G24020	AT5G20240	AT1G03080	AT4G26950	AT2G22990
	AT4G01700	AT2G34430	AT1G03130	AT1G01340	AT1G22370
	AT4G23130	AT5G14180	AT1G03140	AT2G22500	AT1G18330
	AT1G18590	AT3G06850	AT1G03457	AT4G39830	AT5G01240
	AT5G25610	AT2G15880	AT1G03470	AT2G38530	AT3G06080
	AT2G38540	AT5G48180	AT1G03475	AT3G50740	AT3G05880
	AT4G22690	AT1G64720	AT1G03590	AT1G07000	AT3G23080
	AT3G19710	AT4G31290	AT1G03600	AT4G30650	AT2G42580
	AT3G02020	AT3G51000	AT1G03780	AT2G26440	AT1G67265
	AT2G30860	AT2G40420	AT1G03790	AT2G23680	AT1G28330
	AT1G16410	AT5G64040	AT1G03800	AT2G37040	AT5G19940
	AT4G12880	AT2G25080	AT1G03870	AT5G07030	AT4G38680
	AT4G38550	AT4G16563	AT1G03880	AT1G66940	AT5G01600
	AT2G40100	AT5G16110	AT1G03982	AT5G18470	AT5G57660
	AT1G67810	AT2G14170	AT1G04150	AT2G29720	AT5G54380
	AT2G04400	AT5G57550	AT1G04160	AT2G44670	AT1G01620
	AT1G26410	AT2G29290	AT1G04240	AT1G74650	AT1G68190
	AT5G22580	AT4G16690	AT1G04530	AT3G22550	AT5G53970
	AT4G35630	AT1G80160	AT1G04550	AT2G16660	AT4G28750
	AT5G44070	AT1G50040	AT1G04600	AT1G79530	AT1G02620
	AT5G64550	AT4G34881	AT1G04610	AT3G07390	AT5G09440
	AT2G05520	AT4G36730	AT1G04684	AT5G53550	AT1G28260
	AT3G28930	AT1G19540	AT1G04690	AT2G22330	AT4G27450
	AT5G61420	AT1G12520	AT1G05010	AT4G15236	AT1G09420
	AT5G53420	AT5G52920	AT1G05020	AT2G39200	AT2G35170
	AT4G13770	AT1G19530	AT1G05085	AT2G45300	AT5G51550
	AT3G22890	AT5G02840	AT1G05090	AT1G67360	AT3G13740
	AT5G47910	AT2G13360	AT1G05150	AT3G52470	AT3G16240
	AT5G44720	AT3G22960	AT1G05160	AT3G61820	AT4G35770
	AT1G24100	AT5G20230	AT1G05490	AT4G36360	AT3G01500
	AT1G21270	AT3G15850	AT1G05700	AT5G59870	AT1G60160
	AT5G13930	AT4G37220	AT1G05710	AT1G80130	AT1G68010
	AT3G59760	AT2G01850	AT1G05805	AT1G79110	AT5G25240
	AT2G15390	AT3G10740	AT1G05810	AT4G39210	AT5G40890
	AT1G68600	AT4G25170	AT1G05830	AT1G19670	AT5G63810
	AT5G19250	AT1G15040	AT1G05835	AT1G07090	AT1G22740
	AT1G48600	AT5G56100	AT1G05850	AT3G61990	AT4G24050
	AT1G70830	AT1G18270	AT1G05860	AT5G57010	AT1G76090
	AT3G04720	AT5G03615	AT1G05870	AT5G28630	AT1G23870
	AT3G49110	AT1G29930	AT1G05880	AT4G14680	AT3G29240
	AT4G11290	AT2G38230	AT1G06040	AT1G67520	AT5G45830
	AT5G03630	AT5G54080	AT1G06070	AT2G36870	AT1G68020
	AT5G22300	AT1G80380	AT1G06080	AT2G35860	AT4G29950
	AT3G01120	AT1G43670	AT1G06360	AT1G18400	AT1G70090
	AT5G24380	AT1G74880	AT1G06380	AT3G15210	AT1G77210
	AT5G40780	AT4G01870	AT1G06390	AT4G17615	AT5G06980
	AT5G14200	AT5G54270	AT1G06400	AT1G35230	AT5G01720
	AT5G05730	AT1G61520	AT1G06410	AT1G11700	AT2G02710
	AT2G43100	AT5G21930	AT1G06580	AT1G02205	AT5G16030
	AT4G20000	AT5G66040	AT1G06840	AT1G69770	AT5G47240
	AT3G25610	AT1G21680	AT1G06850	AT5G14700	AT4G14480
	AT5G59050	AT5G01530	AT1G06910	AT1G28570	AT2G37025
	AT4G23280	AT2G42170	AT1G06920	AT1G67750	AT3G61198
	AT4G27560	AT5G64570	AT1G06970	AT4G34230	AT2G17500
	AT1G62800	AT2G27385	AT1G06980	AT2G27660	AT2G23130
	AT4G21990	AT3G16950	AT1G07010	AT3G21560	AT4G08950
	AT5G38900	AT2G15890	AT1G07100	AT2G41880	AT5G20710
	AT3G56240	AT2G38800	AT1G07135	AT4G16260	AT5G27920
	AT1G53310	AT3G47470	AT1G07140	AT1G14370	AT5G51790
	AT2G18230	AT5G39530	AT1G07200	AT5G65640	AT4G14130
	AT2G46650	AT2G34420	AT1G07210	AT4G02060	AT2G33810
	AT1G21310	AT2G01530	AT1G07430	AT4G28250	AT4G34970
	AT1G55450	AT4G28040	AT1G07440	AT1G35260	AT3G59930
	AT2G19190	AT3G14595	AT1G07500	AT2G39700	AT4G26530
	AT2G32860	AT1G55510	AT1G07510	AT1G29980	AT1G32170
	AT2G24600	AT4G14410	AT1G07580	AT2G41178	AT3G16690
	AT3G54830	AT4G13340	AT1G07590	AT3G23010	AT3G29575
	AT2G14750	AT3G13062	AT1G07885	AT3G27170	AT1G79360
	AT5G52750	AT3G13065	AT1G07890	AT3G45860	AT5G04770
	AT4G25110	AT3G15620	AT1G07980	AT2G16440	AT1G03610
	AT5G40990	AT5G49730	AT1G08010	AT4G01720	AT3G24715
	AT2G17710	AT3G56140	AT1G08030	AT1G02400	AT4G14140
	AT4G27070	AT1G75220	AT1G08115	AT1G08650	AT4G04630
	AT5G17990	AT5G24735	AT1G08120	AT3G47420	AT2G41640
	AT5G54810	AT4G25910	AT1G08190	AT1G10850	AT4G33467
	AT3G08770	AT3G28220	AT1G08200	AT2G41820	AT1G21910
	AT1G27030	AT3G15820	AT1G08210	AT4G33040	AT3G29670
	AT1G30530	AT5G18630	AT1G08250	AT3G47820	AT2G23150
	AT4G23190	AT5G26740	AT1G08260	AT4G38620	AT1G52890
	AT1G59960	AT4G33150	AT1G08490	AT5G47060	AT1G62770
	AT3G61280	AT2G47270	AT1G08500	AT2G44480	AT3G19680
	AT1G16400	AT5G45820	AT1G08510	AT5G54970	AT3G17860
	AT4G23210	AT4G30270	AT1G08560	AT1G80280	AT2G39710
	AT5G08760	AT4G15530	AT1G08570	AT1G04250	AT2G22860
	AT1G22410	AT4G16190	AT1G08580	AT2G18360	AT1G27670
	AT2G47240	AT1G07110	AT1G08590	AT5G47730	AT4G39070
	AT1G66880	AT5G24800	AT1G08660	AT5G11970	AT4G25270
	AT5G10760	AT1G53580	AT1G08910	AT2G25625	AT5G66110
	AT1G73330	AT4G21810	AT1G09060	AT4G19430	AT2G18260
	AT2G46420	AT2G46910	AT1G09070	AT4G16780	AT5G59220
	AT1G61560	AT1G13650	AT1G09250	AT5G49280	AT1G08920
	AT5G20960	AT5G38200	AT1G09260	AT4G17670	AT1G49500
	AT1G65690	AT1G04133	AT1G09340	AT5G52900	AT3G05905
	AT4G39030	AT1G48840	AT1G09350	AT4G34770	AT1G72070
	AT3G26450	AT1G58270	AT1G09390	AT4G17680	AT4G29905
	AT2G31880	AT5G52120	AT1G09520	AT5G41460	AT2G40008
	AT1G62560	AT3G14690	AT1G09530	AT2G25060	AT2G28120
	AT5G44380	AT5G51150	AT1G09570	AT5G03350	AT5G41080
	AT4G35380	AT1G07187	AT1G09575	AT1G19320	AT4G25707
	AT3G05690	AT1G58180	AT1G10020	AT1G29280	AT1G02640
	AT2G27402	AT3G51330	AT1G10030	AT5G07000	AT4G37240
	AT4G11460	AT4G32340	AT1G10060	AT3G55240	AT3G27690
	AT5G42830	AT1G19400	AT1G10090	AT5G66640	AT4G14550
	AT2G35980	AT5G42900	AT1G10095	AT1G15000	AT5G08150
	AT2G25000	AT2G39800	AT1G10120	AT5G07760	AT1G15330
	AT3G26200	AT4G04840	AT1G10140	AT3G14370	AT5G18600
	AT5G58390	AT4G37180	AT1G10150	AT5G64660	AT4G25780
	AT4G01390	AT4G15760	AT1G10410	AT2G38390	AT2G20670
	AT4G30060	AT5G45310	AT1G10417	AT4G25070	AT1G02660
	AT3G50930	AT3G20680	AT1G10560	AT1G28480	AT5G60022
	AT2G30750	AT1G52342	AT1G10750	AT1G65920	AT1G75470
	AT1G51800	AT1G31290	AT1G10840	AT5G17160	AT2G19802
	AT4G34200	AT1G73750	AT1G10950	AT3G15540	AT5G63450
	AT1G69730	AT4G15610	AT1G10960	AT2G46660	AT5G44010
	AT5G01500	AT4G22470	AT1G11120	AT2G41090	AT1G31920
	AT5G24090	AT5G08410	AT1G11430	AT5G28490	AT5G22920
	AT5G12470	AT3G51325	AT1G11440	AT4G24970	AT4G14490
	AT1G34060	AT4G36900	AT1G11545	AT3G22840	AT1G68670
	AT1G74100	AT3G13061	AT1G11550	AT4G14750	AT3G15630
	AT3G21080	AT1G22690	AT1G11710	AT1G78860	AT5G64870
	AT3G23550	AT3G50820	AT1G11740	AT4G02290	AT5G05965
	AT3G13110	AT4G17970	AT1G11820	AT1G72520	AT2G32550
	AT3G18000	AT3G58490	AT1G11840	AT2G05940	AT4G27950
	AT5G61520	AT1G69523	AT1G11970	AT4G35110	AT4G22810
	AT2G17040	AT3G54880	AT1G12070	AT5G59820	AT4G32480
	AT2G43570	AT2G28110	AT1G12080	AT1G25510	AT5G21950
	AT4G12500	AT3G10020	AT1G12090	AT4G35720	AT1G03170
	AT4G18250	AT1G05340	AT1G12100	AT5G14690	AT4G13800
	AT5G60900	AT4G10030	AT1G12180	AT3G16870	AT1G18280
	AT1G49750	AT5G37540	AT1G12190	AT5G01250	AT1G62420
	AT1G19020	AT3G62950	AT1G12230	AT5G03140	AT5G06865
	AT1G17745	AT1G66100	AT1G12320	AT3G49570	AT1G69890
	AT5G27420	AT5G42825	AT1G12330	AT1G22180	AT4G20362
	AT5G02490	AT3G21870	AT1G12420	AT2G45680	AT1G15010
	AT1G13430	AT5G26280	AT1G12423	AT1G56600	AT2G19810
	AT2G37710	AT2G25770	AT1G12450	AT3G55620	AT1G70290
	AT5G48657	AT5G39520	AT1G12451	AT1G63100	AT3G49790
	AT4G34950	AT2G41210	AT1G12460	AT5G53760	AT1G10550
	AT1G54000	AT3G43850	AT1G12500	AT2G04495	AT5G14650
	AT3G09020	AT5G39190	AT1G12510	AT4G02110	AT1G18710
	AT4G23140	AT2G29940	AT1G12570	AT2G34150	AT5G19120
	AT2G20610	AT2G23110	AT1G12580	AT1G70260	AT1G47990
	AT5G56840	AT1G22570	AT1G12820	AT2G16720	AT3G07350
	AT2G30766	AT3G22640	AT1G12830	AT1G02800	AT5G25290
	AT3G54600	AT5G13370	AT1G12845	AT5G54670	AT5G12270
	AT4G21903	AT2G38210	AT1G12920	AT3G22400	AT3G53550
	AT4G17030	AT1G63180	AT1G12930	AT1G19230	AT1G03990
	AT4G04955	AT4G06410	AT1G12980	AT5G22930	AT1G29100
	AT4G29030	AT1G15380	AT1G12990	AT2G39220	AT5G51780
	AT4G02330	AT4G26140	AT1G13240	AT2G34190	AT2G18550
	AT5G07690	AT3G18320	AT1G13245	AT5G67060	AT5G67411
	AT5G39970	AT1G21360	AT1G13250	AT3G51660	AT2G34030
	AT5G22460	AT4G12830	AT1G13260	AT4G36110	AT1G07985
	AT4G23810	AT1G18200	AT1G13270	AT1G29290	AT2G02720
	AT1G24140	AT1G21410	AT1G13280	AT4G15160	AT5G66700
	AT2G27920	AT5G03860	AT1G13940	AT3G05650	AT5G13170
	AT3G46900	AT3G48390	AT1G13950	AT5G09970
	AT4G18253	AT1G13700	AT1G14180	AT1G14870
	AT1G78570	AT5G66650	AT1G14185	AT1G01830
	AT1G21520	AT2G23030	AT1G14270	AT2G38090
	AT1G05675	AT2G33380	AT1G14280	AT1G56170
	AT2G29350	AT4G22990	AT1G14290	AT2G29730
	AT4G23160	AT2G21140	AT1G14345	AT4G12120
	AT4G38950	AT4G30280	AT1G14350	AT1G66350
	AT1G08090	AT2G46070	AT1G14360	AT3G43960
	AT5G23940	AT1G02860	AT1G14549	AT3G52460
	AT1G11300	AT1G33790	AT1G14600	AT1G64450
	AT1G66920	AT3G48580	AT1G14610	AT3G57540
	AT2G31110	AT1G11070	AT1G14690	AT5G16600
	AT3G44990	AT4G30670	AT1G14700	AT3G14380
	AT3G15518	AT2G29300	AT1G14710	AT3G22410
	AT1G65860	AT5G57640	AT1G14720	AT2G44070
	AT3G57630	AT4G24040	AT1G14730	AT4G14465
	AT4G04830	AT5G04220	AT1G14750	AT1G47840
	AT1G64170	AT2G31380	AT1G14755	AT2G34940
	AT4G13840	AT1G55800	AT1G14840	AT2G20980
	AT5G25930	AT1G09380	AT1G14850	AT4G25760
	AT3G25250	AT3G28290	AT1G14860	AT3G16410
	AT5G44568	AT3G28300	AT1G14890	AT2G25440
	AT5G15950	AT1G77640	AT1G14900	AT2G40475
	AT2G34490	AT5G06795	AT1G14910	AT1G14540
	AT5G50200	AT1G09240	AT1G14920	AT5G64800
	AT4G36500	AT4G22467	AT1G15100	AT1G14880
	AT4G11470	AT5G06860	AT1G15110	AT4G29700
	AT4G39670	AT1G78720	AT1G15120	AT1G15550
	AT1G13210	AT4G25000	AT1G15175	AT4G34650
	AT2G36570	AT1G65610	AT1G15180	AT1G16300
	AT5G59530	AT5G64190	AT1G15210	AT1G78090
	AT1G62180	AT3G20660	AT1G15215	AT1G68330
	AT1G09780	AT1G58190	AT1G15320	AT2G42800
	AT3G23430	AT5G48110	AT1G15340	AT3G51410
	AT5G44480	AT5G26260	AT1G15350	AT5G35525
	AT1G65486	AT3G15780	AT1G15410	AT1G46480
	AT1G36622	AT2G43520	AT1G15570	AT2G21650
	AT5G11920	AT5G63780	AT1G15660	AT3G15340
	AT5G53830	AT5G24270	AT1G15670	AT4G29150
	AT3G07195	AT5G60265	AT1G15680	AT1G29270
	AT5G58940	AT3G55710	AT1G15690	AT5G65320
	AT5G63980	AT5G24420	AT1G15750	AT4G40020
	AT2G07690	AT3G46370	AT1G15757	AT2G33560
	AT1G35560	AT3G60130	AT1G15800	AT4G27270
	AT3G22060	AT1G50732	AT1G15880	AT5G65300
	AT1G43910	AT1G22380	AT1G16170	AT1G62870
	AT4G04570	AT5G02170	AT1G16180	AT3G02120
	AT1G55760	AT5G10150	AT1G16290	AT2G01610
	AT2G35930	AT1G72530	AT1G16490	AT2G33240
	AT5G41740	AT5G09565	AT1G16850	AT5G01790
	AT4G38560	AT5G23380	AT1G16858	AT1G75580
	AT5G24110	AT1G22550	AT1G16870	AT1G67920
	AT5G55180	AT2G36900	AT1G16880	AT5G18080
	AT4G28490	AT4G26260	AT1G17110	AT3G18010
	AT1G28190	AT2G17650	AT1G17120	AT2G34020
	AT4G11850	AT1G09500	AT1G17220	AT1G35830
	AT1G21320	AT1G49320	AT1G17230	AT4G29270
	AT4G39330	AT4G33420	AT1G17350	AT4G14819
	AT5G40390	AT1G03440	AT1G17360	AT4G11550
	AT4G23220	AT3G46700	AT1G17380	AT2G20562
	AT3G22600	AT1G15830	AT1G17450	AT4G37390
	AT1G71400	AT3G14770	AT1G17455	AT1G68430
	AT4G11521	AT3G55230	AT1G17490	AT1G03180
	AT2G16060	AT4G31870	AT1G17500	AT4G37810
	AT1G32450	AT1G16730	AT1G17615	AT5G64810
	AT3G55950	AT1G33960	AT1G17620	AT5G09520
	AT1G14210	AT1G55152	AT1G17830	AT1G02230
	AT1G14170	AT4G28190	AT1G17840	AT1G19840
	AT1G05300	AT2G23100	AT1G17940	AT1G04540
	AT1G28290	AT2G28671	AT1G17950	AT2G36090
	AT5G55450	AT4G39110	AT1G18070	AT2G21220
	AT2G28250	AT3G03480	AT1G18075	AT4G28330
	AT5G65040	AT5G61350	AT1G18290	AT5G40630
	AT2G43620	AT5G15240	AT1G18335	AT5G23270
	AT3G52400	AT1G23120	AT1G18390	AT4G38850
	AT1G21240	AT2G32300	AT1G18410	AT5G58610
	AT2G38870	AT1G66040	AT1G18450	AT3G17130
	AT1G04680	AT1G76410	AT1G18460	AT2G41810
	AT4G01480	AT5G42200	AT1G18580	AT5G55830
	AT5G08260	AT1G54740	AT1G18650	AT3G47830
	AT4G11890	AT1G45163	AT1G18670	AT1G78030
	AT4G15920	AT1G75770	AT1G18680	AT4G30640
	AT4G28420	AT4G28652	AT1G18700	AT1G02810
	AT2G25297	AT1G42560	AT1G18720	AT4G34800
	AT1G07370	AT3G11110	AT1G18730	AT1G73540
	AT1G08477	AT3G16120	AT1G18740	AT3G12720
	AT5G06510	AT4G24230	AT1G18870	AT2G47780
	AT1G61360	AT5G51480	AT1G19000	AT4G17280
	AT1G67980	AT5G19600	AT1G19010	AT4G18630
	AT5G12140	AT4G01430	AT1G19140	AT4G28700
	AT2G47130	AT5G16980	AT1G19150	AT4G35180
	AT1G11330	AT1G18265	AT1G19170	AT1G17400
	AT1G41830	AT1G49310	AT1G19180	AT1G15760
	AT5G52320	AT1G45616	AT1G19220	AT2G45310
	AT1G74210	AT1G22500	AT1G19290	AT3G30340
	AT1G65500	AT1G67070	AT1G19300	AT2G20750
	AT2G32990	AT1G05253	AT1G19310	AT3G12820
	AT1G21313	AT1G20350	AT1G19397	AT4G14690
	AT1G53070	AT1G69880	AT1G19450
	AT1G09932	AT4G37150	AT1G19460
	AT4G36990	AT5G52300	AT1G19570
	AT3G05600	AT2G47190	AT1G19580
	AT1G51060	AT1G75750	AT1G19660
	AT3G04290	AT5G66390	AT1G19790
	AT1G45010	AT1G18773	AT1G19800
	AT3G22125	AT1G80570	AT1G19835
	AT5G42380	AT4G13570	AT1G19850
	AT1G09200	AT1G02610	AT1G19870
	AT3G12910	AT5G63970	AT1G19880
	AT5G45280	AT4G12690	AT1G20010
	AT1G24150	AT2G25780	AT1G20015
	AT3G03770	AT2G36100	AT1G20030
	AT2G32487	AT1G30750	AT1G20070
	AT5G67340	AT1G14520	AT1G20080
	AT1G24145	AT1G22490	AT1G20190
	AT1G44900	AT2G30790	AT1G20200
	AT1G24280	AT3G20395	AT1G20320
	AT5G65360	AT4G38390	AT1G20330
	AT5G44390	AT1G02650	AT1G20340
	AT5G44635	AT1G33720	AT1G20440
	AT5G12420	AT5G44005	AT1G20450
	AT1G66465	AT5G50260	AT1G20460
	AT2G38010	AT1G49490	AT1G20490
	AT1G55910	AT3G15440	AT1G20500
	AT3G16030	AT1G73870	AT1G20510
	AT5G55730	AT1G73610	AT1G20515
	AT5G38530	AT4G21970	AT1G20610
	AT1G75040	AT3G03265	AT1G20620
	AT4G23180	AT2G25090	AT1G20770
	AT2G40740	AT1G78780	AT1G20780
	AT1G21440	AT2G36590	AT1G20790
	AT1G52410	AT4G39675	AT1G20890
	AT2G46140	AT1G10770	AT1G20900
	AT5G52540	AT1G11362	AT1G20970
	AT1G79680	ATMG01080	AT1G20980
	AT3G09520	AT5G57050	AT1G21010
	AT1G65790	AT5G14410	AT1G21050
	AT1G35710	AT1G17810	AT1G21060
	AT2G02930	AT4G01670	AT1G21130
	AT1G76960	AT1G77145	AT1G21140
	AT3G63200	AT1G12030	AT1G21600
	AT2G36690	AT3G28770	AT1G21730
	AT2G18660	AT4G34138	AT1G21738
	AT5G64905	AT3G28740	AT1G21810
	AT5G52760	AT3G02410	AT1G21830
	AT1G53035	AT3G59480	AT1G21835
	AT3G09010	AT5G02670	AT1G21900
	AT2G18680	AT1G07610	AT1G21975
	AT3G56710	AT5G03545	AT1G21980
	AT2G29120	AT3G15450	AT1G21990
	AT4G20780	AT3G01425	AT1G22060
	AT1G53700	AT1G70880	AT1G22065
	AT4G22517	AT1G79770	AT1G22190
	AT2G29460	AT3G19040	AT1G22320
	AT1G57630	AT5G28010	AT1G22330
	AT4G28460	AT1G07180	AT1G22360
	AT5G45650	AT4G21323	AT1G22460
	AT1G65484	AT4G04460	AT1G22470
	AT4G26120	AT2G21235	AT1G22520
	AT1G19250	AT3G17225	AT1G22530
	AT1G35320	AT1G71250	AT1G22600
	AT3G19370	AT1G15050	AT1G22610
	AT2G46640	AT5G59260	AT1G22630
	AT2G17740	AT5G18270	AT1G22640
	AT2G26560	AT4G15990	AT1G22650
	AT1G74030	AT3G61060	AT1G22730
	AT2G45290	AT1G20180	AT1G22760
	AT1G18250	AT3G46690	AT1G22767
	AT3G44720	AT1G15825	AT1G22880
	AT2G46535	AT2G38820	AT1G22882
	AT1G30420	AT1G47578	AT1G22910
	AT2G04040	AT1G65510	AT1G23020
	AT1G67940	AT5G10250	AT1G23030
	AT4G35880	AT4G22755	AT1G23040
	AT5G10400	AT2G17036	AT1G23050
	AT4G21380	AT2G05440	AT1G23060
	AT5G15120	AT5G39160	AT1G23070
	AT2G32680	AT1G06520	AT1G23074
	AT4G01070	AT1G47655	AT1G23080
	AT5G08240	AT4G20990	AT1G23090
	AT1G78410	AT3G25830	AT1G23100
	AT4G21850	AT2G25900	AT1G23380
	AT1G65310	AT5G06870	AT1G23390
	AT1G07160	AT5G40730	AT1G23480
	AT5G12930	AT2G32660	AT1G23490
	AT1G55820	AT5G57620	AT1G23700
	AT4G38340	AT1G18810	AT1G23710
	AT5G65600	AT1G29775	AT1G23860
	AT1G75780	AT3G21720	AT1G23980
	AT1G72930	AT2G41260	AT1G24000
	AT1G60390	AT1G61860	AT1G24120
	AT1G42990	AT1G30860	AT1G24130
	AT4G18430	ATMG00060	AT1G24170
	AT3G01830	AT1G30040	AT1G24180
	AT3G22850	AT1G68170	AT1G24260
	AT3G60440	AT5G59990	AT1G24265
	AT3G21240	AT5G24820	AT1G24530
	AT1G06160	AT2G17880	AT1G24540
	AT4G11000	AT2G39430	AT1G24590
	AT2G46400	AT2G39855	AT1G24600
	AT3G20600	AT2G35075	AT1G24625
	AT1G13750	AT5G59590	AT1G24650
	AT4G09500	AT4G23240	AT1G25230
	AT1G66700	AT1G33055	AT1G25240
	AT5G44820	AT1G63570	AT1G25250
	AT4G13505	AT2G02680	AT1G25270
	AT2G31230	AT1G44608	AT1G25275
	AT1G22890	AT3G21670	AT1G25425
	AT1G30755	AT5G02090	AT1G25440
	AT1G13520	AT3G48360	AT1G25450
	AT1G10990	AT5G51530	AT1G25500
	AT3G13650	AT5G16370	AT1G25540
	AT5G39670	AT3G52310	AT1G25550
	AT1G04770	AT3G60140	AT1G25560
	AT1G13470	AT1G61590	AT1G25570
	AT1G77920	AT1G22110	AT1G26150
	AT3G17060	AT4G23420	AT1G26160
	AT2G37430	AT5G23700	AT1G26270
	AT3G23250	AT2G29620	AT1G26300
	AT5G52310	AT2G21820	AT1G26560
	AT1G59590	AT2G07140	AT1G26773
	AT2G18370	AT1G49530	AT1G26780
	AT4G19370	AT1G70850	AT1G26850
	AT2G33530	AT1G06933	AT1G26870
	AT5G33290	ATCG00180	AT1G26910
	AT3G23110	AT4G26288	AT1G26916
	AT5G42860	AT1G71030	AT1G26920
	AT1G34750	AT1G02820	AT1G26940
	AT2G16890	AT1G31173	AT1G26945
	AT1G26250	AT1G03200	AT1G27050
	AT5G16170	AT1G32780	AT1G27180
	AT4G00970	AT5G49190	AT1G27190
	AT1G74710	AT3G26040	AT1G27210
	AT5G61000	AT1G51830	AT1G27213
	AT2G21850	AT3G45060	AT1G27220
	AT5G63560	AT5G01055	AT1G27280
	AT4G09510	AT2G03850	AT1G27290
	AT1G62540	AT5G51000	AT1G27320
	AT4G39510	AT5G63250	AT1G27330
	AT2G43800	AT2G08750	AT1G27650
	AT2G35760	AT1G70030	AT1G27660
	AT5G44400	AT1G76590	AT1G28110
	AT3G52370	AT4G06534	AT1G28120
	AT3G11080	AT4G32860	AT1G28130
	AT4G23200	AT5G51470	AT1G28270
	AT5G10520	AT3G24463	AT1G28280
	AT1G65985	AT3G18550	AT1G28310
	AT1G67330	AT2G40113	AT1G28320
	AT2G46440	AT1G04147	AT1G28335
	AT1G52030	AT1G68290	AT1G28350
	AT1G29025	AT1G24577	AT1G28360
	AT5G49850	AT3G54065	AT1G28440
	AT2G28790	AT5G09930	AT1G28450
	AT1G76790	AT1G80120	AT1G28490
	AT2G46620	AT2G25095	AT1G28580
	AT1G51890	AT5G46060	AT1G28590
	AT3G46940	AT4G31110	AT1G28680
	AT4G13180	AT2G31910	AT1G28685
	AT4G02520	ATCG00440	AT1G29050
	AT2G21550	AT5G36910	AT1G29060
	AT2G29370	AT1G51840	AT1G29090
	AT5G60780	AT5G39580	AT1G29265
	AT3G53190	AT5G15290	AT1G29395
	AT5G01540	AT5G02330	AT1G29400
	AT5G14760	AT3G54625	AT1G29440
	AT5G49680	AT4G03380	AT1G29450
	AT4G04220	AT1G47603	AT1G29460
	AT3G18250	AT1G02580	AT1G29465
	AT3G57460	AT5G05420	AT1G29490
	AT5G47140	AT1G70020	AT1G29500
	AT4G14450	AT5G39180	AT1G29630
	AT1G51790	AT1G64940	AT1G29640
	AT4G26550	AT1G04157	AT1G29660
	AT1G60270	AT1G01520	AT1G29940
	AT2G32870	AT5G01935	AT1G29950
	AT5G57480	AT2G46572	AT1G30016
	AT4G23320	AT5G40680	AT1G30100
	AT2G32140	AT3G44860	AT1G30110
	AT5G48530	AT3G02040	AT1G30320
	AT1G47480	AT3G51540	AT1G30330
	AT2G40670	AT3G22961	AT1G30350
	AT1G30900	AT3G55580	AT1G30360
	AT5G52910	AT2G24400	AT1G30430
	AT5G48290	AT2G04805	AT1G30440
	AT4G26070	AT5G47000	AT1G30490
	AT1G23730	AT3G04115	AT1G30500
	AT4G26255	AT1G53100	AT1G30560
	AT1G18370	AT3G12203	AT1G30570
	AT4G22513	AT2G20030	AT1G30680
	AT1G57590	AT2G25200	AT1G30690
	AT1G51913	AT2G30362	AT1G30820
	AT2G15042	AT1G30760	AT1G30825
	AT1G33030	AT1G14250	AT1G31020
	AT5G24760	AT3G09450	AT1G31040
	AT5G23420	AT5G66520	AT1G31300
	AT3G55290	AT5G50360	AT1G31310
	AT4G31920	AT3G05080	AT1G31358
	AT1G74300	AT2G27370	AT1G31360
	AT4G22840	AT4G33930	AT1G31410
	AT5G39320	AT5G28080	AT1G31420
	AT3G26840	AT1G66060	AT1G31812
	AT3G06035	AT5G00820	AT1G31814
	AT1G52400	ATMG01010	AT1G31835
	AT3G62960	AT5G59390	AT1G31840
	AT3G08870	AT1G05267	AT1G31875
	AT3G13950	AT2G08220	AT1G31880
	AT4G21390	AT1G19160	AT1G31930
	AT1G24147	AT4G18980	AT1G32050
	AT1G71697	AT1G68935	AT1G32060
	AT5G38250	AT4G03510	AT1G32090
	AT1G06830	AT5G18636	AT1G32100
	AT5G66750	AT1G09510	AT1G32160
	AT5G57510	AT4G14245	AT1G32190
	AT5G15970	AT5G06285	AT1G32200
	AT1G26770	AT2G38220	AT1G32225
	AT4G30110	AT4G21440	AT1G32230
	AT5G22250	AT5G59865	AT1G32240
	AT1G77660	AT4G24340	AT1G32530
	AT2G39330	AT2G45610	AT1G32540
	AT1G49000	AT1G52343	AT1G32640
	AT3G11840	AT1G23510	AT1G32650
	AT2G02020	AT1G15840	AT1G32690
	AT4G23230	AT4G05315	AT1G32700
	AT3G47090	AT1G05973	AT1G32710
	AT3G50900	AT2G25600	AT1G32740
	AT1G66960	AT2G04090	AT1G32910
	AT3G28130	AT1G19620	AT1G32920
	AT4G34590	AT3G53980	AT1G33060
	AT1G56430	AT4G16857	AT1G33070
	AT5G59680	AT2G04621	AT1G33140
	AT5G33370		AT1G33170
	AT1G15125		AT1G33230
	AT5G47850		AT1G33240
	AT2G40900		AT1G33250
	AT4G05020		AT1G33415
	AT4G25750		AT1G33440
	AT4G33720		AT1G33470
	AT1G53625		AT1G33560
	AT1G13340		AT1G33590
	AT5G17780		AT1G33760
	AT1G04020		AT1G33770
	AT5G67280		AT1G34110
	AT3G55150		AT1G34120
	AT1G66930		AT1G34580
	AT5G36925		AT1G34630
	AT2G22190		AT1G35240
	AT3G54420		AT1G35255
	AT1G51920		AT1G35430
	AT1G43800		AT1G35501
	AT4G23030		AT1G35510
	AT4G18360		AT1G35617
	AT1G74590		AT1G35620
	AT1G04220		AT1G35820
	AT1G19960		AT1G36150
	AT5G24580		AT1G36160
	AT4G05110		AT1G36925
	AT1G55120		AT1G36940
	AT5G44990		AT1G37130
	AT5G44910		AT1G37140
	AT1G26960		AT1G42190
	AT3G21950		AT1G42430
	AT2G41230		AT1G42540
	AT1G08940		AT1G42550
	AT2G37460		AT1G44100
	AT1G52290		AT1G44170
	AT2G29740		AT1G44180
	AT4G28680		AT1G44542
	AT1G44800		AT1G44575
	AT3G58550		AT1G44830
	AT4G37370		AT1G44835
	AT4G36880		AT1G45110
	AT1G69720		AT1G45130
	AT3G54150		AT1G45230
	AT5G05460		AT1G45249
	AT5G38550		AT1G45688
	AT1G16520		AT1G46408
	AT1G24575		AT1G46768
	AT1G51915		AT1G46840
	AT4G34810		AT1G47128
	AT2G36200		AT1G47200
	AT1G70170		AT1G47870
	AT4G01450		AT1G48000
	AT2G30670		AT1G48260
	AT3G59140		AT1G48325
	AT5G05270		AT1G48330
	AT4G26660		AT1G48350
	AT3G48850		AT1G49130
	AT5G06740		AT1G49140
	AT3G27500		AT1G49190
	AT2G15220		AT1G49200
	AT3G48630		AT1G49210
	AT5G67450		AT1G49220
	AT5G40540		AT1G49230
	AT4G25350		AT1G49240
	AT4G12030		AT1G49450
	AT2G27389		AT1G49510
	AT5G54490		AT1G49730
	AT3G51450		AT1G49740
	AT1G22250		AT1G49780
	AT1G69930		AT1G49790
	AT1G66090		AT1G50020
	AT3G27650		AT1G50030
	AT1G01560		AT1G50450
	AT5G42010		AT1G50460
	AT1G68585		AT1G50630
	AT5G41880		AT1G50640
	AT2G34960		AT1G50890
	AT5G05340		AT1G51130
	AT1G07620		AT1G51140
	AT1G73810		AT1G51580
	AT2G46150		AT1G51680
	AT1G01120		AT1G51690
	AT3G17420		AT1G51940
	AT2G28755		AT1G51950
	AT5G17700		AT1G52180
	AT2G03090		AT1G52185
	AT1G28370		AT1G52190
	AT1G74360		AT1G52560
	AT1G30370		AT1G52565
	AT1G53990		AT1G52700
	AT3G12145		AT1G52710
	AT2G36890		AT1G52750
	AT4G24580		AT1G52760
	AT3G12502		AT1G52900
	AT5G25170		AT1G53165
	AT5G48430		AT1G53170
	AT4G28230		AT1G53180
	AT4G04750		AT1G53220
	AT4G04480		AT1G53230
	AT5G10390		AT1G53450
	AT5G62550		AT1G53460
	AT1G63020		AT1G53510
	AT3G60160		AT1G53520
	AT3G29000		AT1G53750
	AT1G51850		AT1G53760
	AT4G03450		AT1G53770
	AT3G46110		AT1G53780
	AT5G25910		AT1G53830
	AT1G29860		AT1G53840
	AT5G48400		AT1G53850
	AT5G08020		AT1G53860
	AT5G64890		AT1G54110
	AT5G49330		AT1G54115
	AT4G15910		AT1G54120
	AT5G19730		AT1G54200
	AT4G15390		AT1G54210
	AT4G04700		AT1G54420
	AT3G14740		AT1G55220
	AT4G39230		AT1G55325
	AT2G14247		AT1G55330
	AT5G05790		AT1G55340
	AT4G23150		AT1G55546
	AT4G31650		AT1G55550
	AT3G01990		AT1G55690
	AT2G23270		AT1G55700
	AT1G73805		AT1G55880
	AT1G26390		AT1G56165
	AT3G63380		AT1G56210
	AT3G11340		AT1G56220
	AT4G08300		AT1G56590
	AT1G35310		AT1G56630
	AT1G56150		AT1G56650
	AT2G24762		AT1G58030
	AT1G50110		AT1G58037
	AT4G37900		AT1G58100
	AT1G73620		AT1G58110
	AT3G44400		AT1G58200
	AT4G13510		AT1G58210
	AT1G51460		AT1G59740
	AT3G50160		AT1G59810
	AT4G05590		AT1G59820
	AT3G09940		AT1G59900
	AT5G51465		AT1G59910
	AT1G11600		AT1G59920
	AT5G53110		AT1G60010
	AT3G59550		AT1G60025
	AT3G15680		AT1G60050
	AT4G31950		AT1G60060
	AT4G23610		AT1G60170
	AT5G44565		AT1G60190
	AT1G58590		AT1G60430
	AT1G24070		AT1G60440
	AT4G13195		AT1G60450
	AT1G06137		AT1G61100
	AT1G70985		AT1G61105
	AT5G05300		AT1G61260
	AT1G64405		AT1G61270
	AT3G60120		AT1G61350
	AT5G43420		AT1G61353
	AT2G46380		AT1G61730
	AT3G23800		AT1G61732
	AT1G21250		AT1G61740
	AT2G31160		AT1G61890
	AT5G43650		AT1G61900
	AT4G15093		AT1G62370
	AT3G47540		AT1G62380
	AT5G41761		AT1G62430
	AT1G04520		AT1G62450
	AT3G22142		AT1G62480
	AT4G22030		AT1G62760
	AT3G29030		AT1G62810
	AT3G54580		AT1G62820
	AT2G32210		AT1G62880
	AT3G28550		AT1G62940
	AT1G58400		AT1G62950
	AT2G31345		AT1G63090
	AT2G36970		AT1G63420
	AT4G07820		AT1G63670
	AT3G58990		AT1G63680
	AT2G19580		AT1G63830
	AT2G38380		AT1G63840
	AT5G16190		AT1G64060
	AT2G27970		AT1G64110
	AT1G58420		AT1G64120
	AT4G23885		AT1G64370
	AT3G63110		AT1G64380
	AT1G05575		AT1G64385
	AT3G54390		AT1G64620
	AT1G68740		AT1G64625
	AT5G13060		AT1G64640
	AT1G16500		AT1G64650
	AT5G11210		AT1G64670
	AT4G28430		AT1G64680
	AT1G48960		AT1G64700
	AT1G18980		AT1G64850
	AT2G15760		AT1G64860
	AT1G74080		AT1G64980
	AT1G47890		AT1G64990
	AT1G44130		AT1G65000
	AT3G23740		AT1G65010
	AT1G08050		AT1G65590
	AT2G30770		AT1G65830
	AT5G45090		AT1G65840
	AT1G74440		AT1G65930
	AT5G52860		AT1G66145
	AT2G30840		AT1G66150
	AT3G09490		AT1G66173
	AT4G12870		AT1G66180
	AT4G22305		AT1G66190
	AT5G11140		AT1G66235
	AT1G32350		AT1G66240
	AT1G68238		AT1G66345
	AT4G02420		AT1G66400
	AT1G56540		AT1G66950
	AT5G37490		AT1G67040
	AT1G18970		AT1G67050
	AT3G09405		AT1G67060
	AT1G17560		AT1G67190
	AT4G23510		AT1G67195
	AT5G64000		AT1G67230
	AT5G41750		AT1G67238
	AT1G67630		AT1G67260
	AT3G15390		AT1G67270
	AT2G32380		AT1G67470
	AT1G52270		AT1G67480
	AT4G14650		AT1G67510
	AT3G02800		AT1G67590
	AT2G29110		AT1G67600
	AT2G43870		AT1G67710
	AT5G06730		AT1G67720
	AT1G76620		AT1G67730
	AT1G59970		AT1G67740
	AT4G23310		AT1G67790
	AT3G18730		AT1G67880
	AT4G28310		AT1G67890
	AT4G15417		AT1G67900
	AT5G56610		AT1G67910
	AT5G15130		AT1G68120
	AT4G21200		AT1G68130
	AT1G15150		AT1G68185
	AT1G10040		AT1G68440
	AT2G18210		AT1G68490
	AT3G27660		AT1G68500
	AT2G04100		AT1G68540
	AT5G50930		AT1G68550
	AT5G64080		AT1G68560
	AT1G23830		AT1G68570
	AT3G45710		AT1G68610
	AT5G37690		AT1G68620
	AT3G26830		AT1G68660
	AT1G63220		AT1G68825
	AT5G24240		AT1G68830
	AT5G53820		AT1G68840
	AT3G48920		AT1G69000
	AT2G29100		AT1G69010
	AT4G30250		AT1G69030
	AT1G15520		AT1G69040
	AT1G61800		AT1G69120
	AT2G43880		AT1G69130
	AT5G25180		AT1G69150
	AT4G01270		AT1G69160
	AT5G56960		AT1G69252
	AT1G26240		AT1G69260
	AT3G03190		AT1G69270
	AT2G31270		AT1G69280
	AT2G43610		AT1G69295
	AT1G69920		AT1G69310
	AT1G68450		AT1G69410
	AT2G31180		AT1G69420
	AT1G68390		AT1G69526
	AT1G17430		AT1G69530
	AT4G21740		AT1G69540
	AT2G17280		AT1G69550
	AT1G04730		AT1G69560
	AT3G51280		AT1G69570
	AT3G02820		AT1G69580
	AT5G44585		AT1G69587
	AT1G69440		AT1G69600
	AT3G14225		AT1G69680
	AT1G60095		AT1G69690
	AT5G65420		AT1G69740
	AT4G01360		AT1G69750
	AT2G33850		AT1G69760
	AT1G12380		AT1G69780
	AT4G11170		AT1G69790
	AT3G29034		AT1G69800
	AT3G20370		AT1G69850
	AT4G37290		AT1G69900
	AT1G26200		AT1G69910
	AT1G16060		AT1G70080
	AT5G41400		AT1G70200
	AT4G35620		AT1G70209
	AT1G30280		AT1G70210
	AT4G15975		AT1G70220
	AT4G21760		AT1G70270
	AT4G20325		AT1G70280
	AT5G38310		AT1G70300
	AT3G52630		AT1G70310
	AT3G51240		AT1G70360
	AT4G32830		AT1G70370
	AT1G51860		AT1G70410
	AT5G64790		AT1G70420
	AT4G28790		AT1G70430
	AT3G10930		AT1G70510
	AT4G26960		AT1G70530
	AT5G28610		AT1G70540
	AT4G25240		AT1G70560
	AT5G20790		AT1G70700
	AT2G34010		AT1G70710
	AT1G25370		AT1G70920
	AT5G54140		AT1G70940
	AT5G27765		AT1G70944
	AT3G60550		AT1G70949
	AT5G03390		AT1G71002
	AT5G38340		AT1G71010
	AT3G24840		AT1G71080
	AT1G05260		AT1G71090
	AT3G05740		AT1G71100
	AT1G31580		AT1G71110
	AT3G23120		AT1G71870
	AT3G06030		AT1G71880
	AT3G54430		AT1G71960
	AT1G24270		AT1G71970
	AT1G27720		AT1G72000
	AT3G18900		AT1G72010
	AT1G75150		AT1G72080
	AT1G69810		AT1G72100
	AT4G14368		AT1G72141
	AT5G52810		AT1G72160
	AT3G62040		AT1G72175
	AT2G02010		AT1G72200
	AT3G56620		AT1G72240
	AT1G68795		AT1G72250
	AT1G02970		AT1G72280
	AT3G25882		AT1G72290
	AT5G64900		AT1G72390
	AT5G09800		AT1G72430
	AT3G50190		AT1G72440
	AT4G23700		AT1G72450
	AT4G19970		AT1G72460
	AT1G14470		AT1G72470
	AT3G50140		AT1G72490
	AT2G26390		AT1G72500
	AT1G13480		AT1G72590
	AT1G65060		AT1G72600
	AT1G16510		AT1G72610
	AT1G75300		AT1G72620
	AT1G03820		AT1G72690
	AT4G31910		AT1G72700
	AT1G08757		AT1G72810
	AT3G56870		AT1G72820
	AT1G61550		AT1G72990
	AT2G22930		AT1G73000
	AT5G25090		AT1G73050
	AT2G44300		AT1G73060
	AT3G13672		AT1G73066
	AT1G20720		AT1G73080
	AT5G23530		AT1G73120
	AT3G25780		AT1G73130
	AT5G46350		AT1G73370
	AT2G29470		AT1G73380
	AT5G53990		AT1G73470
	AT1G35210		AT1G73480
	AT4G00670		AT1G73550
	AT2G32960		AT1G73590
	AT3G57260		AT1G73660
	AT4G02700		AT1G73670
	AT3G19615		AT1G73680
	AT2G36440		AT1G73687
	AT4G37400		AT1G73690
	AT4G14400		AT1G73830
	AT1G31200		AT1G73840
	AT4G39250		AT1G73880
	AT3G06370		AT1G73960
	AT4G31875		AT1G73965
	AT1G55265		AT1G74448
	AT4G19030		AT1G74500
	AT1G13530		AT1G74510
	AT4G05775		AT1G74660
	AT1G68470		AT1G74670
	AT5G01870		AT1G74740
	AT2G33130		AT1G74750
	AT4G04490		AT1G74770
	AT4G11280		AT1G74780
	AT1G76680		AT1G74790
	AT3G54590		AT1G74840
	AT1G01600		AT1G74920
	AT4G11070		AT1G74929
	AT4G22510		AT1G75060
	AT5G55340		AT1G75070
	AT1G20060		AT1G75166
	AT1G65620		AT1G75170
	AT2G24700		AT1G75180
	AT4G10310		AT1G75190
	AT1G16330		AT1G75200
	AT5G44575		AT1G75210
	AT2G35990		AT1G75230
	AT2G41231		AT1G75240
	AT3G61950		AT1G75295
	AT1G70990		AT1G75310
	AT4G07165		AT1G75380
	AT3G26190		AT1G75388
	AT3G28580		AT1G75430
	AT4G13990		AT1G75440
	AT4G08555		AT1G75450
	AT5G16690		AT1G75460
	AT2G42760		AT1G75490
	AT1G64490		AT1G75500
	AT1G11610		AT1G75510
	AT3G44450		AT1G75520
	AT3G52450		AT1G75530
	AT2G29750		AT1G75540
	AT5G49120		AT1G75550
	AT2G48130		AT1G75590
	AT1G58170		AT1G75600
	AT3G50760		AT1G75710
	AT1G65250		AT1G75800
	AT4G08780		AT1G75810
	AT4G33130		AT1G75820
	AT4G28550		AT1G75830
	AT3G13433		AT1G76100
	AT5G61890		AT1G76160
	AT1G66620		AT1G76170
	AT4G30860		AT1G76180
	AT1G71200		AT1G76185
	AT1G35290		AT1G76240
	AT3G20960		AT1G76250
	AT2G34500		AT1G76380
	AT2G40750		AT1G76390
	AT3G48600		AT1G76420
	AT5G16350		AT1G76500
	AT4G38080		AT1G76730
	AT5G26220		AT1G76740
	AT5G60250		AT1G76880
	AT2G13820		AT1G76890
	AT5G19260		AT1G76900
	AT4G19050		AT1G77200
	AT5G52720		AT1G77280
	AT3G25130		AT1G77480
	AT5G63580		AT1G77490
	AT5G67270		AT1G77500
	AT5G40590		AT1G77670
	AT2G03505		AT1G77680
	AT3G07960		AT1G77690
	AT4G24010		AT1G77700
	AT5G42530		AT1G77855
	AT1G13830		AT1G77860
	AT1G76690		AT1G77880
	AT5G65090		AT1G78040
	AT4G04540		AT1G78070
	AT1G61255		AT1G78080
	AT3G25010		AT1G78100
	AT4G14390		AT1G78220
	AT1G30700		AT1G78230
	AT3G13432		AT1G78240
	AT3G03670		AT1G78250
	AT3G03130		AT1G78260
	AT5G57190		AT1G78290
	ATMG00590		AT1G78300
	AT5G59670		AT1G78390
	AT5G62480		AT1G78400
	AT1G16220		AT1G78670
	AT4G31730		AT1G78680
	AT4G00955		AT1G78690
	AT3G21700		AT1G78700
	AT5G42840		AT1G78710
	AT1G23140		AT1G78880
	AT3G01175		AT1G78890
	AT5G55170		AT1G78960
	AT5G23990		AT1G78970
	AT2G43040		AT1G79060
	AT5G43080		AT1G79070
	AT3G12220		AT1G79100
	AT2G19590		AT1G79120
	AT4G12620		AT1G79330
	AT5G48310		AT1G79340
	AT4G21920		AT1G79350
	AT1G66600		AT1G79370
	AT3G21780		AT1G79420
	AT5G19890		AT1G79540
	AT2G04050		AT1G79630
	AT1G33800		AT1G79640
	AT3G55110		AT1G79650
	AT2G20110		AT1G79660
	AT3G27640		AT1G79750
	AT1G17170		AT1G79760
	AT5G13320		AT1G80133
	AT4G02850		AT1G80170
	AT5G62210		AT1G80180
	AT3G61390		AT1G80240
	AT5G03995		AT1G80250
	AT1G06135		AT1G80290
	AT1G26330		AT1G80300
	AT4G38830		AT1G80390
	AT4G39630		AT1G80400
	AT2G26400		AT1G80490
	AT1G14260		AT1G80500
	AT5G48410		AT1G80831
	AT2G47140		AT1G80865
	AT3G53600		AT1G80870
	AT4G19975		AT2G01140
	AT3G09190		AT2G01150
	AT1G48605		AT2G01180
	AT1G21890		AT2G01190
	AT5G57390		AT2G01200
	AT1G56020		AT2G01300
	AT4G19720		AT2G01310
	AT4G14640		AT2G01410
	AT5G03435		AT2G01420
	AT3G13600		AT2G01430
	AT4G22505		AT2G01440
	AT2G20142		AT2G01450
	AT3G48080		AT2G01570
	AT3G50010		AT2G01580
	AT2G29710		AT2G01600
	AT1G61600		AT2G01620
	AT2G28085		AT2G01670
	AT3G60415		AT2G01680
	AT2G23010		AT2G01890
	AT1G59860		AT2G01900
	AT4G16807		AT2G01905
	AT1G06090		AT2G01910
	AT2G35350		AT2G02070
	AT4G31970		AT2G02080
	AT5G01550		AT2G02170
	AT5G20820		AT2G02180
	AT5G27630		AT2G02440
	AT3G61760		AT2G02450
	AT5G55150		AT2G02860
	AT2G37560		AT2G02870
	AT5G55560		AT2G02960
	AT5G63590		AT2G02970
	AT5G12970		AT2G03110
	AT1G09000		AT2G03120
	AT1G63530		AT2G03240
	AT4G17000		AT2G03250
	AT1G13609		AT2G03530
	AT3G26960		AT2G03550
	AT1G05640		AT2G03700
	AT3G11520		AT2G03710
	AT2G20590		AT2G03720
	AT5G67520		AT2G03730
	AT4G27652		AT2G03740
	AT3G25100		AT2G03890
	AT5G24660		AT2G03913
	AT2G41180		AT2G04240
	AT1G02450		AT2G04270
	AT1G66270		AT2G04500
	AT5G20640		AT2G05786
	AT1G24095		AT2G05790
	AT5G59320		AT2G05920
	AT1G16070		AT2G06166
	AT5G60142		AT2G06200
	AT2G45900		AT2G07050
	AT1G56060		AT2G07110
	AT5G39000		AT2G10606
	AT3G57240		AT2G10608
	AT5G38565		AT2G10940
	AT4G32950		AT2G10950
	AT3G47780		AT2G13650
	AT5G05240		AT2G13660
	AT2G25510		AT2G14206
	AT3G58070		AT2G14210
	AT3G61400		AT2G14880
	AT5G40260		AT2G14890
	AT5G44582		AT2G14900
	AT1G31690		AT2G14960
	AT1G23965		AT2G15000
	AT1G67000		AT2G15430
	AT3G05660		AT2G15820
	AT3G26480		AT2G15830
	AT2G24195		AT2G16280
	AT2G01379		AT2G16290
	AT2G34655		AT2G16340
	AT1G78320		AT2G16365
	AT2G28210		AT2G16430
	AT2G37300		AT2G16668
	AT1G49570		AT2G16676
	AT5G14750		AT2G16700
	AT5G23830		AT2G16730
	AT4G24140		AT2G16835
	AT2G32280		AT2G16850
	AT5G07780		AT2G16860
	AT2G46940		AT2G16870
	AT5G58860		AT2G17290
	AT3G52748		AT2G17295
	AT4G10390		AT2G17480
	AT2G17060		AT2G17723
	AT5G11590		AT2G17730
	AT5G07810		AT2G18000
	AT2G32030		AT2G18010
	AT4G23600		AT2G18020
	AT1G11160		AT2G18080
	AT4G04510		AT2G18090
	AT4G12000		AT2G18160
	AT5G22540		AT2G18170
	AT5G12920		AT2G18193
	AT5G16530		AT2G18196
	AT2G24680		AT2G18290
	AT5G14565		AT2G18300
	AT2G37390		AT2G18310
	AT1G16640		AT2G18350
	AT3G49340		AT2G18560
	AT2G33080		AT2G18721
	AT2G37510		AT2G18730
	AT3G13090		AT2G18780
	AT2G41850		AT2G18790
	AT4G30975		AT2G18870
	AT1G68765		AT2G18876
	AT5G35480		AT2G18950
	AT3G25510		AT2G18960
	AT3G47480		AT2G18970
	AT1G65450		AT2G18980
	AT5G44567		AT2G19170
	AT2G19780		AT2G19180
	AT5G20550		AT2G19450
	AT1G79960		AT2G19460
	AT5G12880		AT2G19660
	AT1G36640		AT2G19670
	AT1G79850		AT2G19870
	AT2G02850		AT2G19880
	AT4G30090		AT2G20050
	AT4G29740		AT2G20060
	AT3G48450		AT2G20100
	AT5G52390		AT2G20362
	AT5G63130		AT2G20370
	AT1G73040		AT2G20515
	AT4G16820		AT2G20520
	AT4G14380		AT2G20570
	AT1G53690		AT2G20580
	AT4G19230		AT2G20630
	AT1G19210		AT2G20635
	AT5G25970		AT2G20680
	AT4G12350		AT2G20723
	AT1G56670		AT2G20725
	AT5G08640		AT2G20740
	AT3G48490		AT2G20760
	AT2G28780		AT2G20825
	AT1G17250		AT2G20830
	AT5G01840		AT2G20835
	AT4G36610		AT2G20840
	AT1G05540		AT2G20990
	AT2G42060		AT2G21050
	AT5G51160		AT2G21170
	AT3G28880		AT2G21180
	AT3G16680		AT2G21200
	AT3G29410		AT2G21210
	AT5G14330		AT2G21230
	AT5G52220		AT2G21500
	AT5G49152		AT2G21510
	AT1G19970		AT2G21520
	AT2G45080		AT2G21580
	AT1G67820		AT2G21590
	AT3G60540		AT2G21640
	AT5G05135		AT2G21660
	AT4G11210		AT2G21670
	AT4G14940		AT2G22070
	AT3G57010		AT2G22080
	AT5G45700		AT2G22121
	AT3G21305		AT2G22122
	AT4G18195		AT2G22125
	AT3G27400		AT2G22170
	AT3G45330		AT2G22180
	AT5G09480		AT2G22320
	AT1G03100		AT2G22426
	AT1G56240		AT2G22430
	AT1G12370		AT2G22440
	AT1G02460		AT2G22496
	AT5G45240		AT2G22620
	AT3G05980		AT2G22630
	AT1G04660		AT2G22668
	AT3G09960		AT2G22670
	AT5G07390		AT2G22750
	AT1G53080		AT2G22760
	AT2G46750		AT2G22790
	AT4G04900		AT2G22795
	AT4G17660		AT2G22800
	AT4G21840		AT2G22802
	AT5G62150		AT2G22805
	AT1G17710		AT2G22821
	AT5G38000		AT2G22830
	AT3G46880		AT2G22840
	AT3G45070		AT2G22850
	AT5G38010		AT2G22900
	AT1G11100		AT2G23120
	AT1G01200		AT2G23160
	AT4G15500		AT2G23171
	AT3G12170		AT2G23180
	AT1G61480		AT2G23290
	AT2G26310		AT2G23300
	AT2G04070		AT2G23450
	AT2G44580		AT2G23460
	AT5G54610		AT2G23690
	AT5G37940		AT2G23700
	AT5G16740		AT2G23740
	AT4G35810		AT2G23755
	AT3G21520		AT2G23760
	AT1G43605		AT2G23770
	AT2G25810		AT2G24180
	AT3G63255		AT2G24210
	AT5G23190		AT2G24220
	AT5G11930		AT2G24280
	AT4G15396		AT2G24550
	AT4G17760		AT2G24560
	AT5G52400		AT2G24625
	AT2G45870		AT2G24780
	AT2G01913		AT2G24790
	AT4G37490		AT2G25052
	AT1G61120		AT2G25430
	AT2G42990		AT2G25460
	AT1G13420		AT2G25490
	AT1G15625		AT2G25500
	AT3G02885		AT2G25620
	AT2G38160		AT2G26110
	AT2G29680		AT2G26120
	AT1G14390		AT2G26360
	AT1G07490		AT2G26370
	AT3G60900		AT2G26450
	AT3G52540		AT2G26690
	AT1G51670		AT2G26695
	AT5G01120		AT2G26700
	AT5G01330		AT2G26710
	AT2G22880		AT2G26730
	AT5G07700		AT2G26770
	AT2G32020		AT2G26780
	AT1G18180		AT2G26900
	AT5G19970		AT2G26910
	AT1G55020		AT2G27050
	AT2G04515		AT2G27060
	AT5G55380		AT2G27090
	AT1G24430		AT2G27260
	AT1G67035		AT2G27490
	AT5G09290		AT2G27500
	AT5G56580		AT2G27540
	AT3G23175		AT2G27550
	AT4G38820		AT2G27680
	AT1G26760		AT2G27760
	AT3G25905		AT2G27770
	AT5G43240		AT2G27820
	AT1G71691		AT2G27830
	AT5G41040		AT2G27840
	AT5G59720		AT2G27860
	AT5G06590		AT2G27880
	AT1G69520		AT2G28056
	AT5G57123		AT2G28060
	AT2G40150		AT2G28130
	AT4G15270		AT2G28140
	AT2G14560		AT2G28200
	AT4G36950		AT2G28315
	AT1G35250		AT2G28320
	AT4G11480		AT2G28340
	AT2G44450		AT2G28350
	AT5G47960		AT2G28355
	AT1G47395		AT2G28360
	AT1G80370		AT2G28401
	AT2G17050		AT2G28405
	AT1G52800		AT2G28490
	AT2G24980		AT2G28500
	AT2G29440		AT2G28510
	AT1G66280		AT2G28520
	AT4G24890		AT2G28830
	AT5G19880		AT2G28840
	AT5G36970		AT2G28850
	AT1G08100		AT2G28940
	AT1G49700		AT2G28950
	AT3G53650		AT2G29452
	AT1G35910		AT2G29654
	AT2G37260		AT2G29660
	AT5G36907		AT2G29980
	AT1G01590		AT2G29990
	AT2G42110		AT2G30010
	AT3G57200		AT2G30020
	AT4G00525		AT2G30032
	AT3G56260		AT2G30140
	AT4G09820		AT2G30150
	AT3G08470		AT2G30230
	AT3G48540		AT2G30240
	AT2G25260		AT2G30520
	AT4G24265		AT2G30530
	AT1G08037		AT2G31005
	AT1G27880		AT2G31010
	AT1G02405		AT2G31082
	AT1G64360		AT2G31083
	AT3G06020		AT2G31360
	AT1G74460		AT2G31370
	AT4G13690		AT2G31740
	AT1G02940		AT2G31750
	AT1G04760		AT2G31930
	AT2G16580		AT2G31940
	AT1G72720		AT2G31981
	AT5G24540		AT2G31990
	AT4G02730		AT2G32090
	AT1G56250		AT2G32100
	AT5G25570		AT2G32415
	AT3G60660		AT2G32430
	AT5G50120		AT2G32510
	AT4G12540		AT2G32560
	AT2G35730		AT2G32710
	AT2G47230		AT2G32720
	AT3G21460		AT2G32930
	AT1G13500		AT2G32940
	AT5G43570		AT2G32970
	AT1G27580		AT2G32980
	AT4G12735		AT2G33040
	AT1G60830		AT2G33050
	AT2G38470		AT2G33175
	AT1G51620		AT2G33180
	AT4G13210		AT2G33210
	AT1G72910		AT2G33233
	AT4G35160		AT2G33310
	AT1G29195		AT2G33360
	AT1G72220		AT2G33570
	AT1G50590		AT2G33710
	AT5G02060		AT2G33720
	AT3G25490		AT2G33800
	AT1G09812		AT2G34070
	AT3G53150		AT2G34110
	AT5G42610		AT2G34160
	AT5G39110		AT2G34180
	AT5G42280		AT2G34185
	AT2G26020		AT2G34186
	AT2G41450		AT2G34315
	AT5G59520		AT2G34640
	AT5G06585		AT2G34650
	AT3G56220		AT2G34710
	AT2G43445		AT2G34720
	AT2G35585		AT2G34930
	AT1G68850		AT2G34985
	AT4G33810		AT2G35160
	AT4G26380		AT2G35200
	AT2G47950		AT2G35208
	AT5G26690		AT2G35260
	AT5G12340		AT2G35460
	AT3G62210		AT2G35470
	AT2G34080		AT2G35620
	AT4G03480		AT2G35630
	AT1G65550		AT2G35700
	AT2G05632		AT2G35710
	AT5G19650		AT2G35850
	AT2G47550		AT2G35880
	AT3G49750		AT2G35890
	AT4G01895		AT2G35940
	AT4G15210		AT2G35950
	AT5G22390		AT2G36050
	AT3G56500		AT2G36053
	AT4G14120		AT2G36060
	AT1G48580		AT2G36080
	AT2G48140		AT2G36190
	AT3G01960		AT2G36270
	AT2G43440		AT2G36280
	AT3G20110		AT2G36310
	AT1G61410		AT2G36320
	AT1G74190		AT2G36400
	AT3G01140		AT2G36410
	AT5G46295		AT2G36881
	AT1G13600		AT2G36910
	AT5G19410		AT2G36950
	AT3G14395		AT2G37030
	AT5G64667		AT2G37050
	AT3G55515		AT2G37170
	AT1G33260		AT2G37180
	AT1G74420		AT2G37270
	AT5G49560		AT2G37280
	AT1G58225		AT2G37555
	AT5G19520		AT2G37630
	AT1G68568		AT2G37640
	AT1G57560		AT2G37650
	AT4G14060		AT2G37678
	AT3G01995		AT2G37680
	AT3G42725		AT2G37930
	AT1G54540		AT2G37940
	AT5G39090		AT2G38050
	AT1G63710		AT2G38060
	AT2G35658		AT2G38070
	AT5G18300		AT2G38080
	AT1G16360		AT2G38110
	AT3G27150		AT2G38120
	AT2G37820		AT2G38130
	AT4G36680		AT2G38170
	AT5G24640		AT2G38180
	AT2G32130		AT2G38310
	AT2G33020		AT2G38320
	AT5G04950		AT2G38510
	AT1G33930		AT2G39000
	AT5G40570		AT2G39010
	AT5G44574		AT2G39130
	AT4G16350		AT2G39170
	AT1G47130		AT2G39175
	AT1G08860		AT2G39230
	AT1G15640		AT2G39450
	AT5G37840		AT2G39460
	AT3G52550		AT2G39480
	AT5G07475		AT2G39490
	AT2G03360		AT2G39705
	AT4G34580		AT2G39760
	AT5G43250		AT2G39770
	AT1G67110		AT2G39860
	AT5G25880		AT2G39865
	AT3G60490		AT2G39870
	AT2G20150		AT2G39920
	AT1G16150		AT2G39930
	AT5G55460		AT2G39950
	AT3G16900		AT2G39960
	AT5G45920		AT2G39980
	AT1G14550		AT2G39990
	AT1G47485		AT2G40000
	AT1G14080		AT2G40004
	AT1G13635		AT2G40260
	AT2G38500		AT2G40270
	AT2G37960		AT2G40280
	AT5G51310		AT2G40480
	AT2G35859		AT2G40540
	AT1G66830		AT2G40610
	AT5G35870		AT2G40620
	AT3G15050		AT2G40640
	AT1G08283		AT2G40690
	AT5G37950		AT2G40700
	AT4G35590		AT2G40800
	AT5G59330		AT2G40802
	AT2G36660		AT2G40970
	AT2G28690		AT2G40980
	AT5G24330		AT2G41060
	AT4G15480		AT2G41070
	AT5G11290		AT2G41100
	AT1G79400		AT2G41110
	AT3G24510		AT2G41140
	AT4G26890		AT2G41170
	AT2G25980		AT2G41300
	AT3G13610		AT2G41310
	AT4G11650		AT2G41370
	AT2G35380		AT2G41380
	AT5G27060		AT2G41400
	AT1G27710		AT2G41410
	AT3G23190		AT2G41420
	AT2G20710		AT2G41430
	AT1G55940		AT2G41630
	AT3G27495		AT2G41740
	AT2G45760		AT2G41750
	AT5G22570		AT2G41870
	AT1G18140		AT2G41890
	AT3G49960		AT2G41900
	AT3G50170		AT2G41930
	AT5G58680		AT2G41940
	AT1G13040		AT2G41945
	AT2G34920		AT2G42010
	AT1G14630		AT2G42030
	AT5G60730		AT2G42040
	AT1G67780		AT2G42140
	AT2G27313		AT2G42150
	AT3G42180		AT2G42280
	AT4G16240		AT2G42290
	AT5G65230		AT2G42365
			AT2G42380
			AT2G42388
			AT2G42430
			AT2G42440
			AT2G42570
			AT2G42600
			AT2G42620
			AT2G42690
			AT2G42700
			AT2G42810
			AT2G42820
			AT2G42830
			AT2G42870
			AT2G42880
			AT2G42900
			AT2G42955
			AT2G42960
			AT2G43010
			AT2G43020
			AT2G43050
			AT2G43060
			AT2G43130
			AT2G43320
			AT2G43330
			AT2G43340
			AT2G43670
			AT2G43680
			AT2G43910
			AT2G43920
			AT2G44080
			AT2G44120
			AT2G44140
			AT2G44490
			AT2G44500
			AT2G44660
			AT2G44735
			AT2G44740
			AT2G44745
			AT2G44798
			AT2G44810
			AT2G44820
			AT2G44910
			AT2G44920
			AT2G45040
			AT2G45050
			AT2G45180
			AT2G45190
			AT2G45200
			AT2G45210
			AT2G45412
			AT2G45420
			AT2G45430
			AT2G45440
			AT2G45450
			AT2G45470
			AT2G45480
			AT2G45580
			AT2G45590
			AT2G45600
			AT2G45660
			AT2G45670
			AT2G45685
			AT2G45690
			AT2G45710
			AT2G45720
			AT2G45820
			AT2G45830
			AT2G45950
			AT2G45960
			AT2G45970
			AT2G46040
			AT2G46050
			AT2G46160
			AT2G46170
			AT2G46225
			AT2G46260
			AT2G46270
			AT2G46340
			AT2G46360
			AT2G46510
			AT2G46520
			AT2G46530
			AT2G46580
			AT2G46590
			AT2G46600
			AT2G46662
			AT2G46680
			AT2G46685
			AT2G46700
			AT2G46710
			AT2G46770
			AT2G46780
			AT2G46787
			AT2G46790
			AT2G46800
			AT2G46820
			AT2G46830
			AT2G46860
			AT2G46870
			AT2G46970
			AT2G46980
			AT2G47000
			AT2G47020
			AT2G47060
			AT2G47070
			AT2G47160
			AT2G47170
			AT2G47340
			AT2G47350
			AT2G47430
			AT2G47440
			AT2G47490
			AT2G47500
			AT2G47770
			AT2G47830
			AT2G47840
			AT2G47930
			AT2G47940
			AT3G01070
			AT3G01080
			AT3G01360
			AT3G01370
			AT3G01470
			AT3G01472
			AT3G01480
			AT3G01490
			AT3G01513
			AT3G01516
			AT3G01550
			AT3G01560
			AT3G01740
			AT3G01750
			AT3G01850
			AT3G01860
			AT3G02110
			AT3G02140
			AT3G02150
			AT3G02170
			AT3G02180
			AT3G02460
			AT3G02470
			AT3G02493
			AT3G02500
			AT3G02540
			AT3G02550
			AT3G02555
			AT3G02570
			AT3G02580
			AT3G02830
			AT3G02980
			AT3G02990
			AT3G03150
			AT3G03160
			AT3G03170
			AT3G03200
			AT3G03210
			AT3G03456
			AT3G03460
			AT3G03626
			AT3G03820
			AT3G03826
			AT3G03830
			AT3G03840
			AT3G03847
			AT3G03850
			AT3G03870
			AT3G03990
			AT3G04110
			AT3G04120
			AT3G04370
			AT3G04380
			AT3G04420
			AT3G04430
			AT3G04470
			AT3G04480
			AT3G04670
			AT3G04680
			AT3G04721
			AT3G04730
			AT3G04732
			AT3G04735
			AT3G04855
			AT3G04860
			AT3G04870
			AT3G04903
			AT3G04910
			AT3G04920
			AT3G04930
			AT3G04940
			AT3G05020
			AT3G05030
			AT3G05110
			AT3G05120
			AT3G05165
			AT3G05170
			AT3G05220
			AT3G05230
			AT3G05625
			AT3G05630
			AT3G05640
			AT3G05820
			AT3G05830
			AT3G05835
			AT3G05840
			AT3G05890
			AT3G05910
			AT3G05920
			AT3G06060
			AT3G06070
			AT3G06120
			AT3G06125
			AT3G06160
			AT3G06410
			AT3G06420
			AT3G06480
			AT3G06490
			AT3G06500
			AT3G06590
			AT3G06600
			AT3G06650
			AT3G06740
			AT3G06750
			AT3G06760
			AT3G06770
			AT3G06778
			AT3G06780
			AT3G06868
			AT3G06880
			AT3G07005
			AT3G07010
			AT3G07310
			AT3G07320
			AT3G07340
			AT3G07360
			AT3G07380
			AT3G07460
			AT3G07470
			AT3G07480
			AT3G07560
			AT3G07570
			AT3G08020
			AT3G08030
			AT3G08580
			AT3G08590
			AT3G08600
			AT3G08610
			AT3G08636
			AT3G08660
			AT3G08670
			AT3G08720
			AT3G08730
			AT3G08880
			AT3G08890
			AT3G08930
			AT3G08940
			AT3G08990
			AT3G09000
			AT3G09035
			AT3G09040
			AT3G09300
			AT3G09680
			AT3G09690
			AT3G09720
			AT3G09730
			AT3G09970
			AT3G09975
			AT3G10320
			AT3G10330
			AT3G10415
			AT3G10420
			AT3G10720
			AT3G10760
			AT3G10770
			AT3G10910
			AT3G10915
			AT3G10920
			AT3G10974
			AT3G10980
			AT3G10985
			AT3G10986
			AT3G11410
			AT3G11420
			AT3G11490
			AT3G11500
			AT3G11580
			AT3G11590
			AT3G11670
			AT3G11680
			AT3G11690
			AT3G11700
			AT3G11750
			AT3G11760
			AT3G11770
			AT3G11773
			AT3G11890
			AT3G11900
			AT3G12150
			AT3G12160
			AT3G12280
			AT3G12290
			AT3G12300
			AT3G12320
			AT3G12560
			AT3G12570
			AT3G12590
			AT3G12600
			AT3G12610
			AT3G12620
			AT3G12630
			AT3G12670
			AT3G12680
			AT3G12700
			AT3G12710
			AT3G12830
			AT3G12835
			AT3G12840
			AT3G12915
			AT3G12920
			AT3G12930
			AT3G12965
			AT3G12970
			AT3G13310
			AT3G13320
			AT3G13360
			AT3G13370
			AT3G13405
			AT3G13410
			AT3G13500
			AT3G13510
			AT3G13520
			AT3G13525
			AT3G13682
			AT3G13686
			AT3G13720
			AT3G13724
			AT3G13784
			AT3G13790
			AT3G13800
			AT3G13810
			AT3G13820
			AT3G13860
			AT3G13960
			AT3G13970
			AT3G13980
			AT3G13990
			AT3G14010
			AT3G14020
			AT3G14050
			AT3G14060
			AT3G14067
			AT3G14070
			AT3G14205
			AT3G14350
			AT3G14360
			AT3G14440
			AT3G14450
			AT3G14550
			AT3G14560
			AT3G14640
			AT3G14650
			AT3G14750
			AT3G14760
			AT3G14830
			AT3G14840
			AT3G14850
			AT3G14880
			AT3G14890
			AT3G14980
			AT3G14990
			AT3G15020
			AT3G15030
			AT3G15090
			AT3G15095
			AT3G15115
			AT3G15120
			AT3G15200
			AT3G15220
			AT3G15350
			AT3G15470
			AT3G15480
			AT3G15490
			AT3G15500
			AT3G15510
			AT3G15520
			AT3G15530
			AT3G15534
			AT3G15536
			AT3G15548
			AT3G15570
			AT3G15578
			AT3G15640
			AT3G15720
			AT3G15730
			AT3G15760
			AT3G15770
			AT3G16000
			AT3G16010
			AT3G16050
			AT3G16060
			AT3G16110
			AT3G16117
			AT3G16180
			AT3G16190
			AT3G16230
			AT3G16400
			AT3G16570
			AT3G16580
			AT3G16620
			AT3G16630
			AT3G16785
			AT3G16800
			AT3G16820
			AT3G16830
			AT3G16840
			AT3G16850
			AT3G16851
			AT3G16857
			AT3G16860
			AT3G17080
			AT3G17090
			AT3G17100
			AT3G17120
			AT3G17180
			AT3G17185
			AT3G17400
			AT3G17510
			AT3G17520
			AT3G17570
			AT3G17580
			AT3G17800
			AT3G17810
			AT3G17820
			AT3G17830
			AT3G17840
			AT3G17845
			AT3G17850
			AT3G17980
			AT3G17998
			AT3G18020
			AT3G18035
			AT3G18040
			AT3G18050
			AT3G18060
			AT3G18070
			AT3G18080
			AT3G18170
			AT3G18485
			AT3G18490
			AT3G18535
			AT3G18540
			AT3G18710
			AT3G18715
			AT3G18773
			AT3G18779
			AT3G18780
			AT3G18830
			AT3G18840
			AT3G19170
			AT3G19180
			AT3G19200
			AT3G19210
			AT3G19274
			AT3G19380
			AT3G19530
			AT3G19540
			AT3G19550
			AT3G19553
			AT3G19560
			AT3G19580
			AT3G19590
			AT3G19670
			AT3G19690
			AT3G19820
			AT3G19830
			AT3G19960
			AT3G19970
			AT3G20015
			AT3G20250
			AT3G20260
			AT3G20300
			AT3G20310
			AT3G20340
			AT3G20350
			AT3G20550
			AT3G20555
			AT3G20640
			AT3G20650
			AT3G20770
			AT3G20810
			AT3G20820
			AT3G20830
			AT3G21150
			AT3G21260
			AT3G21270
			AT3G21320
			AT3G21330
			AT3G21550
			AT3G22072
			AT3G22080
			AT3G22380
			AT3G22415
			AT3G22436
			AT3G22440
			AT3G22540
			AT3G22845
			AT3G22880
			AT3G22886
			AT3G22968
			AT3G22980
			AT3G23020
			AT3G23030
			AT3G23040
			AT3G23050
			AT3G23060
			AT3G23090
			AT3G23637
			AT3G23640
			AT3G23690
			AT3G23700
[truncated: 1,874 more rows]
